# Supplementary material
Source: Research Square preprint supplement (doi:10.21203/rs.3.rs-9691764/v1)
Supplement: Supplementary file 1 [file 516c273ee2eb2feb43cf9816.docx]

**Appendix A2**

**Functional trait expression determines contrasting temporal trends of Lepidoptera inside and outside protected areas**

Werner Ulrich, Mike Teucher, Patrick Gros, Thomas Schmitt & Jan Christian Habel

Table A1. Summary data of records for each study decade and site category with respect to categorical species traits.

| Decade | Site category | Phagy | | | Main habitat type | | | Dispersion | | |
| --- | --- | --- | --- | --- | --- | --- | --- | --- | --- | --- |
|  |  | Monophagous | Oligophagous | Polyphagous | Both | Forest | Open landscape | Dispersive | Intermediate | Sedentary |
| 1960 | Outside | 2820 | 7272 | 7166 | 331 | 6716 | 10211 | 555 | 14251 | 2452 |
| 1960 | Before | 1294 | 3123 | 2426 | 101 | 2328 | 4414 | 111 | 5675 | 1057 |
| 1960 | Inside | 0 | 0 | 0 | 0 | 0 | 0 | 0 | 0 | 0 |
| 1970 | Outside | 4024 | 11644 | 10274 | 758 | 9789 | 15395 | 1020 | 20739 | 4183 |
| 1970 | Before | 2346 | 7317 | 6491 | 387 | 6979 | 8788 | 389 | 13464 | 2301 |
| 1970 | Inside | 65 | 288 | 158 | 33 | 133 | 345 | 41 | 373 | 97 |
| 1980 | Outside | 2534 | 7208 | 6188 | 733 | 4424 | 10773 | 1305 | 11904 | 2721 |
| 1980 | Before | 1007 | 3331 | 2710 | 248 | 3326 | 3474 | 264 | 6045 | 739 |
| 1980 | Inside | 369 | 863 | 566 | 69 | 575 | 1154 | 87 | 1228 | 483 |
| 1990 | Outside | 2760 | 6328 | 5886 | 1301 | 3106 | 10567 | 1875 | 10176 | 2923 |
| 1990 | Before | 382 | 1230 | 966 | 197 | 705 | 1676 | 165 | 2097 | 316 |
| 1990 | Inside | 275 | 502 | 372 | 82 | 220 | 847 | 71 | 803 | 275 |
| 2000 | Outside | 3540 | 8645 | 8662 | 1917 | 5474 | 13456 | 2516 | 15064 | 3267 |
| 2000 | Before | 188 | 336 | 391 | 60 | 59 | 796 | 78 | 627 | 210 |
| 2000 | Inside | 3632 | 7202 | 7804 | 685 | 4690 | 13263 | 1047 | 13631 | 3960 |
| 2010 | Outside | 3842 | 10552 | 11277 | 2292 | 7664 | 15715 | 2820 | 20016 | 2835 |
| 2010 | Before | 0 | 0 | 0 | 0 | 0 | 0 | 0 | 0 | 0 |
| 2010 | Inside | 1499 | 3788 | 3981 | 511 | 2510 | 6247 | 802 | 7031 | 1435 |
| 2020 | Outside | 3381 | 9172 | 7587 | 3208 | 4610 | 12322 | 3229 | 14354 | 2557 |
| 2020 | Before | 0 | 0 | 0 | 0 | 0 | 0 | 0 | 0 | 0 |
| 2020 | Inside | 534 | 1052 | 705 | 451 | 274 | 1566 | 350 | 1430 | 511 |

Table A2 Summary data of records for each study site and site category with respect to categorical species traits.

| Site | Site category | | | Phagy | | | Main habitat type | | | Dispersion | | |
| --- | --- | --- | --- | --- | --- | --- | --- | --- | --- | --- | --- | --- |
|  | Before | Outside | Inside | Monophagous | Oligophagous | Polyphagous | Both | Forest | Open landscape | Dispersive | Intermediate | Sedentary |
| Bluntautal | 7578 | 0 | 2145 | 1299 | 4423 | 4001 | 375 | 3688 | 5660 | 260 | 8218 | 1245 |
| Hohe Tauern | 2130 | 0 | 23018 | 5214 | 9843 | 10091 | 728 | 6299 | 18121 | 1539 | 17548 | 6061 |
| Kalkhochalpen | 8374 | 0 | 2382 | 1460 | 4966 | 4330 | 216 | 4148 | 6392 | 246 | 8844 | 1666 |
| Salzachauen | 7517 | 0 | 919 | 1286 | 3659 | 3491 | 383 | 4793 | 3260 | 388 | 7870 | 178 |
| Wallersee-Wenger Moor | 7939 | 0 | 5191 | 2332 | 6141 | 4657 | 1122 | 2871 | 9137 | 972 | 9924 | 2234 |
| Outside any PA | 0 | 140762 | 0 | 22901 | 60821 | 57040 | 10540 | 41783 | 88439 | 13320 | 106504 | 20938 |
