# Supplementary material
Source: Research Square preprint supplement (doi:10.21203/rs.3.rs-9691764/v1)
Supplement: Supplementary file 2 [file e9bfdb705f78705e2edac7d7.xlsx]

## Sheet: A1
Functional trait expression determines contrasting temporal trends of Lepidoptera inside and outside protected areas
Table A1. Records of 1,595 butterfly and macromoth species with information on record site. NA: sites outside of protected area.
Species	Place of record	Date of record	Year of record	Altitude of record	Name of protected area	Date of erection	Mean altitude of protected area	Area (km2)	Distance to nearest protected area (m)
Abraxas_grossulariatus	Koppl: Observation-Fundort â€˘ 13,09370/47,81738	2020-07-01	2020	565.698	NA	2015-03-17	NA	NA	4880.42
Abraxas_sylvata	Bergheim Ortsgebiet â€˘ PG-0360	1941-07-01	1941	427.029	NA	2002-12-03	NA	NA	3736.31
Abraxas_sylvata	Bergheim Ortsgebiet â€˘ PG-0360	1941-07-01	1941	427.029	NA	2002-12-03	NA	NA	3736.31
Abraxas_sylvata	Bergheim Ortsgebiet â€˘ PG-0360	1941-07-01	1941	427.029	NA	2002-12-03	NA	NA	3736.31
Abraxas_sylvata	Bergheim Ortsgebiet â€˘ PG-0360	1941-07-01	1941	427.029	NA	2002-12-03	NA	NA	3736.31
Abraxas_sylvata	Salzburg Stadt: Liefering, Salzachseen â€˘ NW (Saalachspitz) â€˘ PG-0510	1957-07-01	1957	409.823	NA	2002-12-03	NA	NA	3312.76
Abraxas_sylvata	Salzburg Stadt: Liefering, Salzachseen â€˘ NW (Saalachspitz) â€˘ PG-0510	1957-07-01	1957	409.823	NA	2002-12-03	NA	NA	3312.76
Abraxas_sylvata	Salzburg Stadt: Morzg, Kleingmain, Josefiau â€˘ PG-0378	1932-07-01	1932	424.267	NA	2015-03-17	NA	NA	2402.26
Abraxas_sylvata	Salzburg Stadt: Morzg, Kleingmain, Josefiau â€˘ PG-0378	1932-07-01	1932	424.267	NA	2015-03-17	NA	NA	2402.26
Abraxas_sylvata	Bergheim Ortsgebiet â€˘ PG-0360	1941-07-01	1941	427.029	NA	2002-12-03	NA	NA	3736.31
Abraxas_sylvata	Bergheim Ortsgebiet â€˘ PG-0360	1941-07-01	1941	427.029	NA	2002-12-03	NA	NA	3736.31
Abraxas_sylvata	Bergheim Ortsgebiet â€˘ PG-0360	1943-07-01	1943	427.029	NA	2002-12-03	NA	NA	3736.31
Abraxas_sylvata	Bergheim Ortsgebiet â€˘ PG-0360	1941-07-01	1941	427.029	NA	2002-12-03	NA	NA	3736.31
Abraxas_sylvata	Bergheim Ortsgebiet â€˘ PG-0360	1941-07-01	1941	427.029	NA	2002-12-03	NA	NA	3736.31
Abraxas_sylvata	Bergheim Ortsgebiet â€˘ PG-0360	1941-07-01	1941	427.029	NA	2002-12-03	NA	NA	3736.31
Abraxas_sylvata	Bergheim Ortsgebiet â€˘ PG-0360	1941-07-01	1941	427.029	NA	2002-12-03	NA	NA	3736.31
Abraxas_sylvata	Bergheim Ortsgebiet â€˘ PG-0360	1941-07-01	1941	427.029	NA	2002-12-03	NA	NA	3736.31
Abraxas_sylvata	GroĂźgmain: KĂĽhbach-Tal, Veitlbruch â€˘ PG-0221	1971-07-01	1971	632.422	NA	2003-09-19	NA	NA	1829.15
Abraxas_sylvata	Strobl: Aigen, Asenalm â€˘ E (SchĂ¶ffaubach)	2018-07-01	2018	613.52	NA	1973-07-27	NA	NA	5443.31
Abraxas_sylvata	Bischofshofen: MĂĽhlbach-Tal, Haidberg â€˘ PG-0606	1975-07-01	1975	961.86	NA	1983-12-15	NA	NA	4127.99
Abraxas_sylvata	Golling an der Salzach: ObergĂ¤u, Luegwinkl â€˘ PG-1322	2005-07-01	2005	474.54	NA	1983-12-15	NA	NA	2352.07
Abraxas_sylvata	Golling an der Salzach: ObergĂ¤u, Luegwinkl â€˘ PG-1322	2003-07-01	2003	474.54	NA	1983-12-15	NA	NA	2352.07
Abraxas_sylvata	Elsbethen: Observation-Fundort â€˘ 13,08827/47,77034	2022-07-01	2022	444.475	NA	2015-03-17	NA	NA	3545.64
Abraxas_sylvata	Golling an der Salzach: ObergĂ¤u, Luegwinkl â€˘ PG-1322	2003-07-01	2003	474.54	NA	1983-12-15	NA	NA	2352.07
Abraxas_sylvata	Golling an der Salzach: ObergĂ¤u, Luegwinkl â€˘ PG-1322	2003-07-01	2003	474.54	NA	1983-12-15	NA	NA	2352.07
Abraxas_sylvata	St. Gilgen: Kienberg, Mondsee-Ufer bei Scharfling (St. Lorenz, OĂ–) â€˘ GE-0025	2007-07-01	2007	481.93	NA	1973-07-27	NA	NA	8928.64
Abraxas_sylvata	St. Gilgen: Kienberg, Mondsee-Ufer bei Scharfling (St. Lorenz, OĂ–) â€˘ GE-0025	2006-07-01	2006	481.93	NA	1973-07-27	NA	NA	8928.64
Abraxas_sylvata	St. Gilgen: Kienberg, Mondsee-Ufer bei Scharfling (St. Lorenz, OĂ–) â€˘ GE-0025	2013-07-01	2013	481.93	NA	1973-07-27	NA	NA	8928.64
Abraxas_sylvata	St. Gilgen: Kienberg, Mondsee-Ufer bei Scharfling (St. Lorenz, OĂ–) â€˘ GE-0025	2012-07-01	2012	481.93	NA	1973-07-27	NA	NA	8928.64
Abraxas_sylvata	St. Gilgen: Kienberg, Mondsee-Ufer bei Scharfling (St. Lorenz, OĂ–) â€˘ GE-0025	2005-07-01	2005	481.93	NA	1973-07-27	NA	NA	8928.64
Abraxas_sylvata	St. Gilgen: Kienberg, Mondsee-Ufer bei Scharfling (St. Lorenz, OĂ–) â€˘ GE-0025	2003-07-01	2003	481.93	NA	1973-07-27	NA	NA	8928.64
Abraxas_sylvata	St. Gilgen: Kienberg, Mondsee-Ufer bei Scharfling (St. Lorenz, OĂ–) â€˘ GE-0025	2006-07-01	2006	481.93	NA	1973-07-27	NA	NA	8928.64
Abraxas_sylvata	St. Gilgen: Kienberg, Mondsee-Ufer bei Scharfling (St. Lorenz, OĂ–) â€˘ GE-0025	2001-07-01	2001	481.93	NA	1973-07-27	NA	NA	8928.64
Abraxas_sylvata	Salzburg Stadt: Aigen â€˘ PG-0355	1967-07-01	1967	433.096	NA	2015-03-17	NA	NA	3422.92
Abraxas_sylvata	Salzburg Stadt: Aigen â€˘ PG-0355	1964-07-01	1964	433.096	NA	2015-03-17	NA	NA	3422.92
Abraxas_sylvata	Salzburg Stadt: MĂ¶nchsberg â€˘ PG-0658	1929-07-01	1929	431.537	NA	2015-03-17	NA	NA	878.234
Abraxas_sylvata	Salzburg Stadt: Aigen â€˘ PG-0355	1967-07-01	1967	433.096	NA	2015-03-17	NA	NA	3422.92
Abraxas_sylvata	Salzburg Stadt: Leopoldskron-Moos, Moor W Gneis / "Gneiser Moor" â€˘ GE-0005	1972-07-01	1972	435.996	NA	2015-03-17	NA	NA	384.555
Abraxas_sylvata	Salzburg-Stadt: Observation-Fundort â€˘ 13,07758/47,77489	2022-07-01	2022	424.117	NA	2015-03-17	NA	NA	2674.34
Abraxas_sylvata	Salzburg Stadt: Aigen â€˘ PG-0355	1969-07-01	1969	433.096	NA	2015-03-17	NA	NA	3422.92
Abraxas_sylvata	Salzburg Stadt: Leopoldskron-Moos, Moor W Gneis / "Gneiser Moor" â€˘ GE-0005	1993-07-01	1993	435.996	NA	2015-03-17	NA	NA	384.555
Abraxas_sylvata	Salzburg Stadt: Hallwang, Kasern â€˘ PG-0273	1960-07-01	1960	498.487	NA	2015-03-17	NA	NA	5051.82
Abraxas_sylvata	Salzburg Stadt: Hallwang, Kasern â€˘ PG-0273	1960-07-01	1960	498.487	NA	2015-03-17	NA	NA	5051.82
Abraxas_sylvata	Bergheim: Plainberg â€˘ PG-0337	1959-07-01	1959	501.429	NA	2002-12-03	NA	NA	4519.79
Abraxas_sylvata	Salzburg Stadt: Hallwang, Kasern â€˘ PG-0273	1960-07-01	1960	498.487	NA	2015-03-17	NA	NA	5051.82
Abraxas_sylvata	Hallein: Rif â€˘ GE-0191	1960-07-01	1960	434.276	NA	2015-03-17	NA	NA	4967.98
Abraxas_sylvata	Hallein: Rif â€˘ GE-0191	1962-07-01	1962	434.276	NA	2015-03-17	NA	NA	4967.98
Abraxas_sylvata	St. Georgen bei Salzburg: Roding â€˘ PG-0679	1976-07-01	1976	446.205	NA	2002-12-03	NA	NA	1009.66
Abraxas_sylvata	Salzburg Stadt: Innere Stadt, Kapuzinerberg â€˘ PG-0736	1975-07-01	1975	623.933	NA	2015-03-17	NA	NA	1992.32
Abraxas_sylvata	Golling an der Salzach: Pass Lueg â€˘ POE-0018	2011-07-01	2011	495.44	NA	1983-12-15	NA	NA	552.641
Abraxas_sylvata	Pfarrwerfen Ortsgebiet â€˘ PG-0180	1956-07-01	1956	535.08	NA	1982-02-16	NA	NA	3573.97
Abraxas_sylvata	Pfarrwerfen Ortsgebiet â€˘ PG-0180	1956-07-01	1956	535.08	NA	1982-02-16	NA	NA	3573.97
Abraxas_sylvata	Golling an der Salzach: Pass Lueg â€˘ POE-0018	2011-07-01	2011	495.44	NA	1983-12-15	NA	NA	552.641
Abraxas_sylvata	Salzburg - Gaisberg: Observation-Fundort â€˘ 13,09438/47,77211	2022-07-01	2022	545.43	NA	2015-03-17	NA	NA	3961.46
Abraxas_sylvata	Golling an der Salzach: PaĂź Lueg â€˘ PG-0538	2015-07-01	2015	550.88	NA	1982-02-16	NA	NA	1959.16
Abraxas_sylvata	Golling an der Salzach: PaĂź Lueg â€˘ PG-0538	2014-07-01	2014	550.88	NA	1982-02-16	NA	NA	1959.16
Abraxas_sylvata	Golling an der Salzach: PaĂź Lueg â€˘ PG-0538	2013-07-01	2013	550.88	NA	1982-02-16	NA	NA	1959.16
Abraxas_sylvata	Golling an der Salzach: PaĂź Lueg â€˘ PG-0538	2012-07-01	2012	550.88	NA	1982-02-16	NA	NA	1959.16
Abraxas_sylvata	Bischofshofen: MĂĽhlbach-Tal, Haidberg â€˘ PG-0606	1971-07-01	1971	961.86	NA	1983-12-15	NA	NA	4127.99
Abraxas_sylvata	Bischofshofen: MĂĽhlbach-Tal, Haidberg â€˘ PG-0606	1998-07-01	1998	961.86	NA	1983-12-15	NA	NA	4127.99
Abraxas_sylvata	Bischofshofen: MĂĽhlbach-Tal, Haidberg â€˘ PG-0606	1974-07-01	1974	961.86	NA	1983-12-15	NA	NA	4127.99
Abraxas_sylvata	Bischofshofen: MĂĽhlbach-Tal, Haidberg â€˘ PG-0606	1973-07-01	1973	961.86	NA	1983-12-15	NA	NA	4127.99
Abraxas_sylvata	Koppl: Guggenthal, Kohlhub, Alter Bach NE Kohlhub â€˘ PG-0392	2019-07-01	2019	563.714	NA	2015-03-17	NA	NA	4881.17
Abraxas_sylvata	Koppl: Guggenthal, Kohlhub, Alter Bach NE Kohlhub â€˘ PG-0392	2017-07-01	2017	563.714	NA	2015-03-17	NA	NA	4881.17
Abraxas_sylvata	Koppl: Observation-Fundort â€˘ 13,09381/47,81734	2019-07-01	2019	567.249	NA	2015-03-17	NA	NA	4884.27
Abraxas_sylvata	Koppl: Observation-Fundort â€˘ 13,09353/47,81712	2022-07-01	2022	567.245	NA	2015-03-17	NA	NA	4852.78
Abraxas_sylvata	GroĂźgmain: KĂĽhbach-Tal, Veitlbruch â€˘ PG-0221	1982-07-01	1982	632.422	NA	2003-09-19	NA	NA	1829.15
Abraxas_sylvata	GroĂźgmain: KĂĽhbach-Tal, Veitlbruch â€˘ PG-0221	1982-07-01	1982	632.422	NA	2003-09-19	NA	NA	1829.15
Abraxas_sylvata	GroĂźgmain: KĂĽhbach-Tal, Veitlbruch â€˘ PG-0221	1980-07-01	1980	632.422	NA	2003-09-19	NA	NA	1829.15
Abraxas_sylvata	GroĂźgmain: KĂĽhbach-Tal, Veitlbruch â€˘ PG-0221	1976-07-01	1976	632.422	NA	2003-09-19	NA	NA	1829.15
Abraxas_sylvata	Werfen: Observation-Fundort â€˘ 13,18398/47,47755	2022-07-01	2022	636.33	NA	1982-02-16	NA	NA	2605.3
Abraxas_sylvata	Bischofshofen: MĂĽhlbach-Tal, Haidberg â€˘ PG-0606	1975-07-01	1975	961.86	NA	1983-12-15	NA	NA	4127.99
Abraxas_sylvata	GroĂźgmain: KĂĽhbach-Tal, Veitlbruch â€˘ PG-0221	1990-07-01	1990	632.422	NA	2003-09-19	NA	NA	1829.15
Abraxas_sylvata	Werfen: Observation-Fundort â€˘ 13,18393/47,47758	2022-07-01	2022	640.18	NA	1982-02-16	NA	NA	2606.81
Abraxas_sylvata	Koppl: Guggenthal, Kohlhub, Alter Bach NE Kohlhub â€˘ PG-0392	2009-07-01	2009	563.714	NA	2015-03-17	NA	NA	4881.17
Abraxas_sylvata	Koppl: Guggenthal, Kohlhub, Alter Bach NE Kohlhub â€˘ PG-0392	2008-07-01	2008	563.714	NA	2015-03-17	NA	NA	4881.17
Abraxas_sylvata	Koppl: Guggenthal, Kohlhub, Alter Bach NE Kohlhub â€˘ PG-0392	2010-07-01	2010	563.714	NA	2015-03-17	NA	NA	4881.17
Abraxas_sylvata	Koppl: Guggenthal, Kohlhub, Alter Bach NE Kohlhub â€˘ PG-0392	2009-07-01	2009	563.714	NA	2015-03-17	NA	NA	4881.17
Abraxas_sylvata	Koppl: Guggenthal, Kohlhub, Alter Bach NE Kohlhub â€˘ PG-0392	2003-07-01	2003	563.714	NA	2015-03-17	NA	NA	4881.17
Abraxas_sylvata	Koppl: Guggenthal, Kohlhub, Alter Bach NE Kohlhub â€˘ PG-0392	2001-07-01	2001	563.714	NA	2015-03-17	NA	NA	4881.17
Abraxas_sylvata	Koppl: Guggenthal, Kohlhub, Alter Bach NE Kohlhub â€˘ PG-0392	2007-07-01	2007	563.714	NA	2015-03-17	NA	NA	4881.17
Abraxas_sylvata	Koppl: Guggenthal, Kohlhub, Alter Bach NE Kohlhub â€˘ PG-0392	2007-07-01	2007	563.714	NA	2015-03-17	NA	NA	4881.17
Abraxas_sylvata	Koppl: Guggenthal, Kohlhub, Alter Bach NE Kohlhub â€˘ PG-0392	2012-07-01	2012	563.714	NA	2015-03-17	NA	NA	4881.17
Abraxas_sylvata	Koppl: Guggenthal, Kohlhub, Alter Bach NE Kohlhub â€˘ PG-0392	2016-07-01	2016	563.714	NA	2015-03-17	NA	NA	4881.17
Abraxas_sylvata	Koppl: Guggenthal, Kohlhub, Alter Bach NE Kohlhub â€˘ PG-0392	2013-07-01	2013	563.714	NA	2015-03-17	NA	NA	4881.17
Abraxas_sylvata	Koppl: Guggenthal, Kohlhub, Alter Bach NE Kohlhub â€˘ PG-0392	2013-07-01	2013	563.714	NA	2015-03-17	NA	NA	4881.17
Abraxas_sylvata	Koppl: Guggenthal, Kohlhub, Alter Bach NE Kohlhub â€˘ PG-0392	2011-07-01	2011	563.714	NA	2015-03-17	NA	NA	4881.17
Abraxas_sylvata	Koppl: Guggenthal, Kohlhub, Alter Bach NE Kohlhub â€˘ PG-0392	2011-07-01	2011	563.714	NA	2015-03-17	NA	NA	4881.17
Abraxas_sylvata	Koppl: Guggenthal, Kohlhub, Alter Bach NE Kohlhub â€˘ PG-0392	2018-07-01	2018	563.714	NA	2015-03-17	NA	NA	4881.17
Abraxas_sylvata	Koppl: Guggenthal, Kohlhub, Alter Bach NE Kohlhub â€˘ PG-0392	2011-07-01	2011	563.714	NA	2015-03-17	NA	NA	4881.17
Abraxas_sylvata	Leogang Ortsgebiet â€˘ PG-0065	1961-07-01	1961	793.02	NA	1983-12-15	NA	NA	7432.94
Abraxas_sylvata	Leogang Ortsgebiet â€˘ PG-0065	1961-07-01	1961	793.02	NA	1983-12-15	NA	NA	7432.94
Abraxas_sylvata	Faistenau: Tiefbrunnau, KĂĽhleiten / "KĂĽhleitenalm" â€˘ GE-0018	1975-07-01	1975	909.45	NA	2016-02-01	NA	NA	7570.21
Abraxas_sylvata	Taxenbach: Eschenau â€˘ PG-0939	1973-07-01	1973	948.43	NA	2005-02-22	NA	NA	6867.25
Abraxas_sylvata	St. Johann im Pongau: Wagrainer StraĂźe	1971-07-01	1971	717.17	NA	1990-04-27	NA	NA	5119.3
Abraxas_sylvata	St. Johann im Pongau: Wagrainer StraĂźe	1971-07-01	1971	717.17	NA	1990-04-27	NA	NA	5119.3
Abraxas_sylvata	Zell am See Ortsgebiet â€˘ PG-0780	1954-07-01	1954	759.13	NA	1972-12-28	NA	NA	1238.34
Abraxas_sylvata	Koppl: Winkl, "Spechtenschmiede" â€˘ W â€˘ PG-0909	1972-07-01	1972	742.43	NA	1975-09-30	NA	NA	7098.18
Abraxas_sylvata	GroĂźarl: Observation-Fundort â€˘ 13,19299/47,24792	2022-07-01	2022	929.65	NA	1990-04-27	NA	NA	3133.89
Abraxas_sylvata	GroĂźarl: Observation-Fundort â€˘ 13,19305/47,24793	2022-07-01	2022	929.65	NA	1990-04-27	NA	NA	3136.69
Abraxas_sylvata	GroĂźarl: Observation-Fundort â€˘ 13,19303/47,24796	2022-07-01	2022	929.42	NA	1990-04-27	NA	NA	3133.4
Abraxas_sylvata	GroĂźarl: Observation-Fundort â€˘ 13,19302/47,24792	2022-07-01	2022	929.65	NA	1990-04-27	NA	NA	3135.64
Abraxas_sylvata	Hollersbach im Pinzgau (ungenau) â€˘ "Steinbruch" â€˘ GE-0089	1992-07-01	1992	821.95	NA	1984-01-01	NA	NA	2409.97
Abraxas_sylvata	Werfen: Observation-Fundort â€˘ 13,16848/47,45285	2022-07-01	2022	837.77	NA	1983-12-15	NA	NA	1959.07
Abraxas_sylvata	Salzburg Stadt: Gaisberg, Zistelalm â€˘ PG-0288	1959-07-01	1959	1005	NA	2015-03-17	NA	NA	5707.28
Abraxas_sylvata	Hollersbach im Pinzgau (ungenau) â€˘ "Steinbruch" â€˘ GE-0089	1992-07-01	1992	821.95	NA	1984-01-01	NA	NA	2409.97
Abraxas_sylvata	WeiĂźbach bei Lofer (ungenau) â€˘ PG-0320	1958-07-01	1958	664.86	NA	1983-12-15	NA	NA	5089.17
Abraxas_sylvata	WeiĂźbach bei Lofer (ungenau) â€˘ PG-0320	1958-07-01	1958	664.86	NA	1983-12-15	NA	NA	5089.17
Abraxas_sylvata	WeiĂźbach bei Lofer (ungenau) â€˘ PG-0320	1953-07-01	1953	664.86	NA	1983-12-15	NA	NA	5089.17
Abraxas_sylvata	WeiĂźbach bei Lofer (ungenau) â€˘ PG-0320	1958-07-01	1958	664.86	NA	1983-12-15	NA	NA	5089.17
Abraxas_sylvata	GroĂźgmain: KĂĽhbach-Tal, Veitlbruch â€˘ PG-0221	1981-07-01	1981	632.422	NA	2003-09-19	NA	NA	1829.15
Abraxas_sylvata	GroĂźgmain: KĂĽhbach-Tal, Veitlbruch â€˘ PG-0221	1981-07-01	1981	632.422	NA	2003-09-19	NA	NA	1829.15
Abraxas_sylvata	GroĂźgmain: KĂĽhbach-Tal, Veitlbruch â€˘ PG-0221	1979-07-01	1979	632.422	NA	2003-09-19	NA	NA	1829.15
Abraxas_sylvata	GroĂźgmain: KĂĽhbach-Tal, Veitlbruch â€˘ PG-0221	1986-07-01	1986	632.422	NA	2003-09-19	NA	NA	1829.15
Abraxas_sylvata	Abtenau Ortsgebiet â€˘ PG-0354	1927-07-01	1927	714.61	NA	1982-02-16	NA	NA	2658.48
Abraxas_sylvata	HĂĽttau Ortsgebiet â€˘ PG-1215	1941-07-01	1941	703.05	NA	1982-02-16	NA	NA	7910.45
Abraxas_sylvata	Sankt Veit im Pongau: Observation-Fundort â€˘ 13,14863/47,32578	2007-07-01	2007	668.7	NA	1990-04-27	NA	NA	3586.68
Abraxas_sylvata	Abtenau Ortsgebiet â€˘ PG-0354	1927-07-01	1927	714.61	NA	1982-02-16	NA	NA	2658.48
Abraxas_sylvata	WeiĂźbach bei Lofer (ungenau) â€˘ PG-0320	1953-07-01	1953	664.86	NA	1983-12-15	NA	NA	5089.17
Abraxas_sylvata	WeiĂźbach bei Lofer (ungenau) â€˘ PG-0320	1953-07-01	1953	664.86	NA	1983-12-15	NA	NA	5089.17
Abraxas_sylvata	Faistenau: Observation-Fundort â€˘ 13,25014/47,74677	2022-07-01	2022	686.51	NA	1975-09-30	NA	NA	6827.18
Abraxas_sylvata	WeiĂźbach bei Lofer (ungenau) â€˘ PG-0320	1927-07-01	1927	664.86	NA	1983-12-15	NA	NA	5089.17
Abraxas_sylvata	Salzburg Stadt: Nonntal, Thumegger Bezirk â€˘ GE-0012	2013-07-01	2013	424.724	NA	2015-03-17	NA	NA	357.071
Abraxas_sylvata	Salzburg Stadt (ungenau) â€˘ 410-435 m â€˘ PG-0346	1952-07-01	1952	423.869	NA	2015-03-17	NA	NA	866.906
Abraxas_sylvata	Salzburg Stadt: Hallwang, Sam, "GLT MoorwĂ¤ldchen in Sam" â€˘ PG-0007	1969-07-01	1969	429.789	NA	2015-03-17	NA	NA	4811.07
Abraxas_sylvata	Salzburg Stadt: MĂ¶nchsberg â€˘ PG-0658	1942-07-01	1942	431.537	NA	2015-03-17	NA	NA	878.234
Abraxas_sylvata	Hallwang: SĂ¶llheim â€˘ PG-0338	1958-07-01	1958	455.046	NA	1980-01-25	NA	NA	5036.4
Abraxas_sylvata	Hallein: Rif â€˘ GE-0191	1960-07-01	1960	434.276	NA	2015-03-17	NA	NA	4967.98
Abraxas_sylvata	Salzburg Stadt: Aigen, Parsch â€˘ PG-0208	1962-07-01	1962	432.161	NA	2015-03-17	NA	NA	2878
Abraxas_sylvata	Salzburg-Stadt: Observation-Fundort â€˘ 13,0789/47,77613	2022-07-01	2022	423.877	NA	2015-03-17	NA	NA	2763.63
Abraxas_sylvata	Salzburg Stadt: MĂ¶nchsberg â€˘ PG-0658	1941-07-01	1941	431.537	NA	2015-03-17	NA	NA	878.234
Abraxas_sylvata	Salzburg Stadt: Riedenburg, Rainberg â€˘ PG-0381	1993-07-01	1993	445.517	NA	2015-03-17	NA	NA	711.944
Abraxas_sylvata	Dorfgastein: Strohlehenalm	2000-07-01	2000	1082.09	NA	1990-04-27	NA	NA	3349.72
Abraxas_sylvata	Dorfgastein: Strohlehenalm	2000-07-01	2000	1082.09	NA	1990-04-27	NA	NA	3349.72
Abraxas_sylvata	Uttendorf: Stubachtal, Schneiderau â€˘ PG-0219	1947-07-01	1947	1006.22	NA	1984-01-01	NA	NA	1399.67
Abraxas_sylvata	Uttendorf: Stubachtal, Schneiderau â€˘ PG-0219	1950-07-01	1950	1006.22	NA	1984-01-01	NA	NA	1399.67
Abraxas_sylvata	GrĂ¶dig: Untersberg â€˘ PG-0222	1903-07-01	1903	1611.75	NA	2018-12-31	NA	NA	3290.67
Abraxas_sylvata	Uttendorf: Stubachtal, Schneiderau â€˘ PG-0219	1947-07-01	1947	1006.22	NA	1984-01-01	NA	NA	1399.67
Abraxas_sylvata	Fusch an der GroĂźglocknerstraĂźe: Observation-Fundort â€˘ 12,83126/47,12394	2022-07-01	2022	2565.08	NA	1984-01-01	NA	NA	161.508
Abraxas_sylvata	St. Johann im Pongau: Hahnbaum	1998-07-01	1998	1231.37	NA	1990-04-27	NA	NA	6752.59
Abraxas_sylvata	WeiĂźbach bei Lofer: DieĂźbach-Tal, DieĂźbachstausee â€˘ W â€˘ PG-1341	2003-07-01	2003	1399.81	NA	1983-12-15	NA	NA	129.19
Abraxas_sylvata	Abtenau: Einberg â€˘ POE-0007	2011-07-01	2011	1111.01	NA	2005-02-22	NA	NA	6465.8
Abraxas_sylvata	St. Gilgen: Kienberg, Mondsee-Ufer bei Scharfling (St. Lorenz, OĂ–) â€˘ GE-0025	2010-07-01	2010	481.93	NA	1973-07-27	NA	NA	8928.64
Abraxas_sylvata	St. Gilgen: Kienberg, Mondsee-Ufer bei Scharfling (St. Lorenz, OĂ–) â€˘ GE-0025	2008-07-01	2008	481.93	NA	1973-07-27	NA	NA	8928.64
Abraxas_sylvata	St. Gilgen: Kienberg, Mondsee-Ufer bei Scharfling (St. Lorenz, OĂ–) â€˘ GE-0025	2012-07-01	2012	481.93	NA	1973-07-27	NA	NA	8928.64
Abraxas_sylvata	St. Gilgen: Kienberg, Mondsee-Ufer bei Scharfling (St. Lorenz, OĂ–) â€˘ GE-0025	2006-07-01	2006	481.93	NA	1973-07-27	NA	NA	8928.64
Abraxas_sylvata	St. Gilgen: Kienberg, Mondsee-Ufer bei Scharfling (St. Lorenz, OĂ–) â€˘ GE-0025	2006-07-01	2006	481.93	NA	1973-07-27	NA	NA	8928.64
Abraxas_sylvata	St. Gilgen: Kienberg, Mondsee-Ufer bei Scharfling (St. Lorenz, OĂ–) â€˘ GE-0025	2008-07-01	2008	481.93	NA	1973-07-27	NA	NA	8928.64
Abraxas_sylvata	St. Gilgen: Kienberg, Mondsee-Ufer bei Scharfling (St. Lorenz, OĂ–) â€˘ GE-0025	2007-07-01	2007	481.93	NA	1973-07-27	NA	NA	8928.64
Abraxas_sylvata	Elsbethen: Observation-Fundort â€˘ 13,10071/47,76727	2019-07-01	2019	544.983	NA	2015-03-17	NA	NA	4530.8
Abraxas_sylvata	Golling an der Salzach Ortsgebiet â€˘ PG-0225	1956-07-01	1956	467.92	NA	2002-12-03	NA	NA	1771.24
Abraxas_sylvata	Bergheim: Plainberg â€˘ PG-0337	1959-07-01	1959	501.429	NA	2002-12-03	NA	NA	4519.79
Abraxas_sylvata	Bergheim: Plainberg â€˘ PG-0337	1959-07-01	1959	501.429	NA	2002-12-03	NA	NA	4519.79
Abraxas_sylvata	Salzburg-Stadt: Observation-Fundort â€˘ 13,09199/47,7799	2022-07-01	2022	447.364	NA	2015-03-17	NA	NA	3734.96
Abraxas_sylvata	Bergheim: Plainberg â€˘ PG-0337	1959-07-01	1959	501.429	NA	2002-12-03	NA	NA	4519.79
Abraxas_sylvata	Bergheim: Plainberg â€˘ PG-0337	1959-07-01	1959	501.429	NA	2002-12-03	NA	NA	4519.79
Abraxas_sylvata	St. Gilgen: Kienberg, Mondsee-Ufer bei Scharfling (St. Lorenz, OĂ–) â€˘ GE-0025	2006-07-01	2006	481.93	NA	1973-07-27	NA	NA	8928.64
Abraxas_sylvata	St. Gilgen: Kienberg, Mondsee-Ufer bei Scharfling (St. Lorenz, OĂ–) â€˘ GE-0025	2004-07-01	2004	481.93	NA	1973-07-27	NA	NA	8928.64
Abraxas_sylvata	Golling an der Salzach: ObergĂ¤u, Luegwinkl â€˘ PG-1322	2003-07-01	2003	474.54	NA	1983-12-15	NA	NA	2352.07
Abraxas_sylvata	Golling an der Salzach: ObergĂ¤u, Luegwinkl â€˘ PG-1322	2003-07-01	2003	474.54	NA	1983-12-15	NA	NA	2352.07
Abraxas_sylvata	Golling an der Salzach: ObergĂ¤u, Luegwinkl â€˘ PG-1322	2003-07-01	2003	474.54	NA	1983-12-15	NA	NA	2352.07
Abraxas_sylvata	Koppl: Guggenthal, Kohlhub, Alter Bach NE Kohlhub â€˘ PG-0392	2004-07-01	2004	563.714	NA	2015-03-17	NA	NA	4881.17
Abraxas_sylvata	Koppl: Guggenthal, Kohlhub, Alter Bach NE Kohlhub â€˘ PG-0392	2001-07-01	2001	563.714	NA	2015-03-17	NA	NA	4881.17
Abraxas_sylvata	Koppl: Guggenthal, Kohlhub, Alter Bach NE Kohlhub â€˘ PG-0392	2005-07-01	2005	563.714	NA	2015-03-17	NA	NA	4881.17
Abraxas_sylvata	Koppl: Guggenthal, Kohlhub, Alter Bach NE Kohlhub â€˘ PG-0392	2004-07-01	2004	563.714	NA	2015-03-17	NA	NA	4881.17
Abraxas_sylvata	Koppl: Guggenthal, Kohlhub, Alter Bach NE Kohlhub â€˘ PG-0392	2010-07-01	2010	563.714	NA	2015-03-17	NA	NA	4881.17
Abraxas_sylvata	Koppl: Guggenthal, Kohlhub, Alter Bach NE Kohlhub â€˘ PG-0392	2010-07-01	2010	563.714	NA	2015-03-17	NA	NA	4881.17
Abraxas_sylvata	Koppl: Guggenthal, Kohlhub, Alter Bach NE Kohlhub â€˘ PG-0392	2011-07-01	2011	563.714	NA	2015-03-17	NA	NA	4881.17
Abraxas_sylvata	Koppl: Guggenthal, Kohlhub, Alter Bach NE Kohlhub â€˘ PG-0392	2011-07-01	2011	563.714	NA	2015-03-17	NA	NA	4881.17
Abraxas_sylvata	Koppl: Guggenthal, Kohlhub, Alter Bach NE Kohlhub â€˘ PG-0392	2005-07-01	2005	563.714	NA	2015-03-17	NA	NA	4881.17
Abraxas_sylvata	Koppl: Guggenthal, Kohlhub, Alter Bach NE Kohlhub â€˘ PG-0392	2005-07-01	2005	563.714	NA	2015-03-17	NA	NA	4881.17
Abraxas_sylvata	Koppl: Guggenthal, Kohlhub, Alter Bach NE Kohlhub â€˘ PG-0392	2009-07-01	2009	563.714	NA	2015-03-17	NA	NA	4881.17
Abraxas_sylvata	Koppl: Guggenthal, Kohlhub, Alter Bach NE Kohlhub â€˘ PG-0392	2008-07-01	2008	563.714	NA	2015-03-17	NA	NA	4881.17
Abraxas_sylvata	Salzburg Stadt: Morzg, Hellbrunn, Hellbrunner Berg	2015-07-01	2015	486.943	NA	2015-03-17	NA	NA	2102.16
Abraxas_sylvata	Hallwang Ortsgebiet â€˘ PG-0330	1946-07-01	1946	509.733	NA	1980-01-25	NA	NA	3857.03
Abraxas_sylvata	Werfen: Ghf. Stegenwald, Autobahn-Kehre â€˘ PG-0753	1953-07-01	1953	514.86	NA	1982-02-16	NA	NA	277.986
Abraxas_sylvata	Pfarrwerfen Ortsgebiet â€˘ PG-0180	1960-07-01	1960	535.08	NA	1982-02-16	NA	NA	3573.97
Abraxas_sylvata	Pfarrwerfen Ortsgebiet â€˘ PG-0180	1960-07-01	1960	535.08	NA	1982-02-16	NA	NA	3573.97
Abraxas_sylvata	Pfarrwerfen Ortsgebiet â€˘ PG-0180	1962-07-01	1962	535.08	NA	1982-02-16	NA	NA	3573.97
Abraxas_sylvata	Pfarrwerfen Ortsgebiet â€˘ PG-0180	1959-07-01	1959	535.08	NA	1982-02-16	NA	NA	3573.97
Abraxas_sylvata	GroĂźgmain: KĂĽhbach-Tal, Veitlbruch â€˘ PG-0221	1971-07-01	1971	632.422	NA	2003-09-19	NA	NA	1829.15
Abraxas_sylvata	GroĂźgmain: KĂĽhbach-Tal, Veitlbruch â€˘ PG-0221	1992-07-01	1992	632.422	NA	2003-09-19	NA	NA	1829.15
Abraxas_sylvata	GroĂźgmain: KĂĽhbach-Tal, Veitlbruch â€˘ PG-0221	1981-07-01	1981	632.422	NA	2003-09-19	NA	NA	1829.15
Abraxas_sylvata	GroĂźgmain: KĂĽhbach-Tal, Veitlbruch â€˘ PG-0221	1979-07-01	1979	632.422	NA	2003-09-19	NA	NA	1829.15
Abraxas_sylvata	Koppl: Observation-Fundort â€˘ 13,09379/47,81741	2020-07-01	2020	563.862	NA	2015-03-17	NA	NA	4887.8
Abraxas_sylvata	Koppl: Observation-Fundort â€˘ 13,09381/47,81739	2021-07-01	2021	566.114	NA	2015-03-17	NA	NA	4887.64
Abraxas_sylvata	Schwarzach im Pongau Ortsgebiet â€˘ PG-0633	1961-07-01	1961	595.33	NA	1990-04-27	NA	NA	3088.82
Abraxas_sylvata	Koppl: Observation-Fundort â€˘ 13,09395/47,81736	2022-07-01	2022	567.141	NA	2015-03-17	NA	NA	4893.96
Abraxas_sylvata	WeiĂźbach bei Lofer (ungenau) â€˘ PG-0320	1976-07-01	1976	664.86	NA	1983-12-15	NA	NA	5089.17
Abraxas_sylvata	Salzburg - Gaisberg: Observation-Fundort â€˘ 13,09061/47,80871	2022-07-01	2022	640.724	NA	2015-03-17	NA	NA	4158.62
Abraxas_sylvata	HĂĽttau Ortsgebiet â€˘ PG-1215	1940-07-01	1940	703.05	NA	1982-02-16	NA	NA	7910.45
Abraxas_sylvata	HĂĽttau Ortsgebiet â€˘ PG-1215	1940-07-01	1940	703.05	NA	1982-02-16	NA	NA	7910.45
Abraxas_sylvata	GroĂźgmain: KĂĽhbach-Tal, Veitlbruch â€˘ PG-0221	1987-07-01	1987	632.422	NA	2003-09-19	NA	NA	1829.15
Abraxas_sylvata	GroĂźgmain: KĂĽhbach-Tal, Veitlbruch â€˘ PG-0221	1983-07-01	1983	632.422	NA	2003-09-19	NA	NA	1829.15
Abraxas_sylvata	Lofer: Loferbach-Tal, "Steppenhang" â€˘ PG-0420	2009-07-01	2009	643.03	NA	2018-12-31	NA	NA	5143.58
Abraxas_sylvata	GroĂźgmain: KĂĽhbach-Tal, Veitlbruch â€˘ PG-0221	1996-07-01	1996	632.422	NA	2003-09-19	NA	NA	1829.15
Abraxas_sylvata	Koppl: Guggenthal, Kohlhub, Alter Bach NE Kohlhub â€˘ PG-0392	2016-07-01	2016	563.714	NA	2015-03-17	NA	NA	4881.17
Abraxas_sylvata	Koppl: Guggenthal, Kohlhub, Alter Bach NE Kohlhub â€˘ PG-0392	2015-07-01	2015	563.714	NA	2015-03-17	NA	NA	4881.17
Abraxas_sylvata	Koppl: Guggenthal, Kohlhub, Alter Bach NE Kohlhub â€˘ PG-0392	2013-07-01	2013	563.714	NA	2015-03-17	NA	NA	4881.17
Abraxas_sylvata	Koppl: Guggenthal, Kohlhub, Alter Bach NE Kohlhub â€˘ PG-0392	2012-07-01	2012	563.714	NA	2015-03-17	NA	NA	4881.17
Abraxas_sylvata	Koppl: Guggenthal, Kohlhub, Alter Bach NE Kohlhub â€˘ PG-0392	2015-07-01	2015	563.714	NA	2015-03-17	NA	NA	4881.17
Abraxas_sylvata	Koppl: Guggenthal, Kohlhub, Alter Bach NE Kohlhub â€˘ PG-0392	2014-07-01	2014	563.714	NA	2015-03-17	NA	NA	4881.17
Abraxas_sylvata	Koppl: Guggenthal, Kohlhub, Alter Bach NE Kohlhub â€˘ PG-0392	2015-07-01	2015	563.714	NA	2015-03-17	NA	NA	4881.17
Abraxas_sylvata	Koppl: Guggenthal, Kohlhub, Alter Bach NE Kohlhub â€˘ PG-0392	2018-07-01	2018	563.714	NA	2015-03-17	NA	NA	4881.17
Abraxas_sylvata	Koppl: Observation-Fundort â€˘ 13,09357/47,81724	2021-07-01	2021	567.47	NA	2015-03-17	NA	NA	4863.24
Abraxas_sylvata	Koppl: Observation-Fundort â€˘ 13,09357/47,81720	2021-07-01	2021	567.574	NA	2015-03-17	NA	NA	4860.55
Abraxas_sylvata	Koppl: Observation-Fundort â€˘ 13,09378/47,81737	2020-07-01	2020	566.114	NA	2015-03-17	NA	NA	4884.51
Abraxas_sylvata	Koppl: Observation-Fundort â€˘ 13,09383/47,81737	2021-07-01	2021	566.603	NA	2015-03-17	NA	NA	4887.49
Abraxas_sylvata	Koppl: Guggenthal, Kohlhub, Alter Bach NE Kohlhub â€˘ PG-0392	2013-07-01	2013	563.714	NA	2015-03-17	NA	NA	4881.17
Abraxas_sylvata	Koppl: Guggenthal, Kohlhub, Alter Bach NE Kohlhub â€˘ PG-0392	2013-07-01	2013	563.714	NA	2015-03-17	NA	NA	4881.17
Abraxas_sylvata	Koppl: Guggenthal, Kohlhub, Alter Bach NE Kohlhub â€˘ PG-0392	2015-07-01	2015	563.714	NA	2015-03-17	NA	NA	4881.17
Abraxas_sylvata	Koppl: Guggenthal, Kohlhub, Alter Bach NE Kohlhub â€˘ PG-0392	2013-07-01	2013	563.714	NA	2015-03-17	NA	NA	4881.17
Abraxas_sylvata	Elsbethen: Observation-Fundort â€˘ 13,10353/47,76727	2021-07-01	2021	536.274	NA	2015-03-17	NA	NA	4736.32
Abraxas_sylvata	Golling an der Salzach: Observation-Fundort â€˘ 13,16787/47,59631	2021-07-01	2021	468	NA	2002-12-03	NA	NA	1747.62
Abraxas_sylvata	Strobl: Observation-Fundort â€˘ 13,52228/47,68992	2021-07-01	2021	1008.85	NA	1973-07-27	NA	NA	4620.38
Abraxas_sylvata	Salzburg - Haunsberg: Observation-Fundort â€˘ 12,99849/47,93463	2022-07-01	2022	557.755	NA	2002-12-03	NA	NA	2666
Abraxas_sylvata	GroĂźgmain: KĂĽhbach-Tal, Veitlbruch â€˘ PG-0221	1976-07-01	1976	632.422	NA	2003-09-19	NA	NA	1829.15
Abraxas_sylvata	St. Gilgen: Kienberg, Mondsee-Ufer bei Scharfling (St. Lorenz, OĂ–) â€˘ GE-0025	2006-07-01	2006	481.93	NA	1973-07-27	NA	NA	8928.64
Abraxas_sylvata	Taxenbach: Eschenau â€˘ PG-0939	1958-07-01	1958	948.43	NA	2005-02-22	NA	NA	6867.25
Abraxas_sylvata	Taxenbach: Eschenau â€˘ PG-0939	1958-07-01	1958	948.43	NA	2005-02-22	NA	NA	6867.25
Abraxas_sylvata	Goldegg: BĂ¶ndlsee	1999-07-01	1999	848.09	NA	2005-02-22	NA	NA	4792.08
Abraxas_sylvata	Saalfelden am Steinernen Meer: Hohlwegen, StoĂźwand â€˘ FuĂź â€˘ PG-2691	2013-07-01	2013	689.18	NA	1983-12-15	NA	NA	174.537
Abraxas_sylvata	Saalfelden am Steinernen Meer: Hohlwegen, StoĂźwand â€˘ FuĂź â€˘ PG-2691	2013-07-01	2013	689.18	NA	1983-12-15	NA	NA	174.537
Abraxas_sylvata	Zell am See Ortsgebiet â€˘ PG-0780	1952-07-01	1952	759.13	NA	1972-12-28	NA	NA	1238.34
Abraxas_sylvata	Koppl: Winkl, "Spechtenschmiede" â€˘ W â€˘ PG-0909	1972-07-01	1972	742.43	NA	1975-09-30	NA	NA	7098.18
Abraxas_sylvata	Salzburg Stadt: Aigen, Parsch â€˘ PG-0208	1962-07-01	1962	432.161	NA	2015-03-17	NA	NA	2878
Abraxas_sylvata	Saalbach-Hinterglemm: Hinterglemm / hinteres Glemmtal (ungenau) â€˘ PG-0067	1969-07-01	1969	1320.96	NA	2018-12-31	NA	NA	12239.6
Abraxas_sylvata	St. Gilgen: Kienberg, Mondsee-Ufer bei Scharfling (St. Lorenz, OĂ–) â€˘ GE-0025	2008-07-01	2008	481.93	NA	1973-07-27	NA	NA	8928.64
Abraxas_sylvata	Faistenau: Observation-Fundort â€˘ 13,23842/47,78678	2022-07-01	2022	894.58	NA	1975-09-30	NA	NA	2548.39
Abraxas_sylvata	Faistenau: Observation-Fundort â€˘ 13,2385/47,7866	2022-07-01	2022	884.78	NA	1975-09-30	NA	NA	2565.52
Abraxas_sylvata	Hintersee: Observation-Fundort â€˘ 13,28324/47,68842	2022-07-01	2022	1075.77	NA	2005-02-22	NA	NA	4851.62
Abraxas_sylvata	Hintersee: Observation-Fundort â€˘ 13,2833/47,68843	2022-07-01	2022	1073.69	NA	2005-02-22	NA	NA	4847.69
Abrostola_asclepiadis	Muhr: Pfeifenberger â€˘ PG-0090	1974-07-01	1974	1194.51	NA	1984-01-01	NA	NA	7016.32
Abrostola_asclepiadis	St. Gilgen: Kienberg, Mondsee-Ufer bei Scharfling (St. Lorenz, OĂ–) â€˘ GE-0025	2012-07-01	2012	481.93	NA	1973-07-27	NA	NA	8928.64
Abrostola_asclepiadis	Salzburg Stadt: Aigen, Parsch â€˘ PG-0208	1959-07-01	1959	432.161	NA	2015-03-17	NA	NA	2878
Abrostola_asclepiadis	St. Gilgen: Kienberg, Mondsee-Ufer bei Scharfling (St. Lorenz, OĂ–) â€˘ GE-0025	2012-07-01	2012	481.93	NA	1973-07-27	NA	NA	8928.64
Abrostola_asclepiadis	St. Gilgen: Kienberg, Mondsee-Ufer bei Scharfling (St. Lorenz, OĂ–) â€˘ GE-0025	2009-07-01	2009	481.93	NA	1973-07-27	NA	NA	8928.64
Abrostola_asclepiadis	Salzburg Stadt: Aigen, Parsch â€˘ PG-0208	1957-07-01	1957	432.161	NA	2015-03-17	NA	NA	2878
Abrostola_asclepiadis	St. Gilgen: Kienberg, Mondsee-Ufer bei Scharfling (St. Lorenz, OĂ–) â€˘ GE-0025	2008-07-01	2008	481.93	NA	1973-07-27	NA	NA	8928.64
Abrostola_asclepiadis	St. Gilgen: Kienberg, Mondsee-Ufer bei Scharfling (St. Lorenz, OĂ–) â€˘ GE-0025	2007-07-01	2007	481.93	NA	1973-07-27	NA	NA	8928.64
Abrostola_asclepiadis	St. Gilgen: Kienberg, Mondsee-Ufer bei Scharfling (St. Lorenz, OĂ–) â€˘ GE-0025	2013-07-01	2013	481.93	NA	1973-07-27	NA	NA	8928.64
Abrostola_asclepiadis	St. Gilgen: Kienberg, Mondsee-Ufer bei Scharfling (St. Lorenz, OĂ–) â€˘ GE-0025	2008-07-01	2008	481.93	NA	1973-07-27	NA	NA	8928.64
Abrostola_asclepiadis	St. Gilgen: Kienberg, Mondsee-Ufer bei Scharfling (St. Lorenz, OĂ–) â€˘ GE-0025	2003-07-01	2003	481.93	NA	1973-07-27	NA	NA	8928.64
Abrostola_asclepiadis	Salzburg Stadt: Hallwang, Kasern â€˘ PG-0273	1948-07-01	1948	498.487	NA	2015-03-17	NA	NA	5051.82
Abrostola_asclepiadis	St. Gilgen: Kienberg, Mondsee-Ufer bei Scharfling (St. Lorenz, OĂ–) â€˘ GE-0025	2006-07-01	2006	481.93	NA	1973-07-27	NA	NA	8928.64
Abrostola_asclepiadis	St. Gilgen: Kienberg, Mondsee-Ufer bei Scharfling (St. Lorenz, OĂ–) â€˘ GE-0025	2002-07-01	2002	481.93	NA	1973-07-27	NA	NA	8928.64
Abrostola_asclepiadis	Salzburg Stadt: Aigen, Parsch â€˘ PG-0208	1960-07-01	1960	432.161	NA	2015-03-17	NA	NA	2878
Abrostola_asclepiadis	Salzburg Stadt: Aigen, Parsch â€˘ PG-0208	1958-07-01	1958	432.161	NA	2015-03-17	NA	NA	2878
Abrostola_asclepiadis	Salzburg Stadt: Aigen, Parsch â€˘ PG-0208	2015-07-01	2015	432.161	NA	2015-03-17	NA	NA	2878
Abrostola_asclepiadis	Salzburg Stadt: Aigen, Parsch â€˘ PG-0208	1960-07-01	1960	432.161	NA	2015-03-17	NA	NA	2878
Abrostola_asclepiadis	Muhr: Pfeifenberger â€˘ PG-0090	1975-07-01	1975	1194.51	NA	1984-01-01	NA	NA	7016.32
Abrostola_asclepiadis	Muhr: Pfeifenberger â€˘ PG-0090	2003-07-01	2003	1194.51	NA	1984-01-01	NA	NA	7016.32
Abrostola_asclepiadis	St. Johann im Pongau: Hahnbaum	1972-07-01	1972	1231.37	NA	1990-04-27	NA	NA	6752.59
Abrostola_asclepiadis	Muhr: Pfeifenberger â€˘ PG-0090	1975-07-01	1975	1194.51	NA	1984-01-01	NA	NA	7016.32
Abrostola_asclepiadis	St. Gilgen: Kienberg, Mondsee-Ufer bei Scharfling (St. Lorenz, OĂ–) â€˘ GE-0025	2006-07-01	2006	481.93	NA	1973-07-27	NA	NA	8928.64
Abrostola_asclepiadis	St. Gilgen: Kienberg, Mondsee-Ufer bei Scharfling (St. Lorenz, OĂ–) â€˘ GE-0025	2006-07-01	2006	481.93	NA	1973-07-27	NA	NA	8928.64
Abrostola_asclepiadis	St. Gilgen: Kienberg, Mondsee-Ufer bei Scharfling (St. Lorenz, OĂ–) â€˘ GE-0025	2007-07-01	2007	481.93	NA	1973-07-27	NA	NA	8928.64
Abrostola_asclepiadis	Golling an der Salzach Ortsgebiet â€˘ PG-0225	1938-07-01	1938	467.92	NA	2002-12-03	NA	NA	1771.24
Abrostola_asclepiadis	Hallein: Rif â€˘ GE-0191	1960-07-01	1960	434.276	NA	2015-03-17	NA	NA	4967.98
Abrostola_asclepiadis	St. Gilgen: Kienberg, Mondsee-Ufer bei Scharfling (St. Lorenz, OĂ–) â€˘ GE-0025	2006-07-01	2006	481.93	NA	1973-07-27	NA	NA	8928.64
Abrostola_asclepiadis	St. Gilgen: Kienberg, Mondsee-Ufer bei Scharfling (St. Lorenz, OĂ–) â€˘ GE-0025	2005-07-01	2005	481.93	NA	1973-07-27	NA	NA	8928.64
Abrostola_asclepiadis	Lofer: Loferbach-Tal, "Steppenhang" â€˘ PG-0420	2009-07-01	2009	643.03	NA	2018-12-31	NA	NA	5143.58
Abrostola_asclepiadis	Lofer: Loferbach-Tal, "Steppenhang" â€˘ PG-0420	2009-07-01	2009	643.03	NA	2018-12-31	NA	NA	5143.58
Abrostola_asclepiadis	MĂĽhlbach am HochkĂ¶nig Ortsgebiet â€˘ PG-0277	1974-07-01	1974	837.71	NA	1983-12-15	NA	NA	3746.93
Abrostola_asclepiadis	Salzburg Stadt: Gaisberg, Kapaunberg â€˘ PG-0737	1989-07-01	1989	752.263	NA	2015-03-17	NA	NA	4380.04
Abrostola_asclepiadis	Koppl: Guggenthal, Kohlhub, Alter Bach NE Kohlhub â€˘ PG-0392	2009-07-01	2009	563.714	NA	2015-03-17	NA	NA	4881.17
Abrostola_asclepiadis	St. Johann im Pongau Ortsgebiet â€˘ PG-0386	1968-07-01	1968	614.78	NA	1990-04-27	NA	NA	6144.43
Abrostola_asclepiadis	Salzburg Stadt: Gaisberg, Kapaunberg â€˘ PG-0737	1989-07-01	1989	752.263	NA	2015-03-17	NA	NA	4380.04
Abrostola_asclepiadis	GroĂźgmain: KĂĽhbach-Tal, Veitlbruch â€˘ PG-0221	1986-07-01	1986	632.422	NA	2003-09-19	NA	NA	1829.15
Abrostola_asclepiadis	Hollersbach im Pinzgau (ungenau) â€˘ "Steinbruch" â€˘ GE-0089	1992-07-01	1992	821.95	NA	1984-01-01	NA	NA	2409.97
Abrostola_asclepiadis	Koppl: Winkl, "Spechtenschmiede" â€˘ W â€˘ PG-0909	1974-07-01	1974	742.43	NA	1975-09-30	NA	NA	7098.18
Abrostola_asclepiadis	Rauris: WĂ¶rth â€˘ PG-0025	1963-07-01	1963	958.6	NA	1984-01-01	NA	NA	606.919
Abrostola_asclepiadis	Rauris: WĂ¶rth â€˘ PG-0025	1959-07-01	1959	958.6	NA	1984-01-01	NA	NA	606.919
Abrostola_asclepiadis	Koppl: Winkl, "Spechtenschmiede" â€˘ W â€˘ PG-0909	1973-07-01	1973	742.43	NA	1975-09-30	NA	NA	7098.18
Abrostola_asclepiadis	Koppl: Winkl, "Spechtenschmiede" â€˘ W â€˘ PG-0909	1973-07-01	1973	742.43	NA	1975-09-30	NA	NA	7098.18
Abrostola_asclepiadis	Koppl: Winkl, "Spechtenschmiede" â€˘ W â€˘ PG-0909	1974-07-01	1974	742.43	NA	1975-09-30	NA	NA	7098.18
Abrostola_asclepiadis	Koppl: Winkl, "Spechtenschmiede" â€˘ W â€˘ PG-0909	1974-07-01	1974	742.43	NA	1975-09-30	NA	NA	7098.18
Abrostola_asclepiadis	Pfarrwerfen Ortsgebiet â€˘ PG-0180	1960-07-01	1960	535.08	NA	1982-02-16	NA	NA	3573.97
Abrostola_asclepiadis	Werfen: Tenneck â€˘ PG-0228	1940-07-01	1940	521.52	NA	1982-02-16	NA	NA	1547.62
Abrostola_asclepiadis	Hallwang: SĂ¶llheim â€˘ PG-0338	1961-07-01	1961	455.046	NA	1980-01-25	NA	NA	5036.4
Abrostola_asclepiadis	Salzburg Stadt: MĂ¶nchsberg â€˘ PG-0658	1955-07-01	1955	431.537	NA	2015-03-17	NA	NA	878.234
Abrostola_asclepiadis	St. Gilgen: Kienberg, Mondsee-Ufer bei Scharfling (St. Lorenz, OĂ–) â€˘ GE-0025	2006-07-01	2006	481.93	NA	1973-07-27	NA	NA	8928.64
Abrostola_asclepiadis	Golling an der Salzach Ortsgebiet â€˘ PG-0225	1938-07-01	1938	467.92	NA	2002-12-03	NA	NA	1771.24
Abrostola_asclepiadis	Salzburg Stadt: Aigen, Parsch â€˘ PG-0208	1959-07-01	1959	432.161	NA	2015-03-17	NA	NA	2878
Abrostola_asclepiadis	Salzburg Stadt: MĂ¶nchsberg â€˘ PG-0658	1928-07-01	1928	431.537	NA	2015-03-17	NA	NA	878.234
Abrostola_asclepiadis	Salzburg Stadt: Aigen â€˘ PG-0355	1968-07-01	1968	433.096	NA	2015-03-17	NA	NA	3422.92
Abrostola_asclepiadis	St. Gilgen: Kienberg, Mondsee-Ufer bei Scharfling (St. Lorenz, OĂ–) â€˘ GE-0025	2010-07-01	2010	481.93	NA	1973-07-27	NA	NA	8928.64
Abrostola_asclepiadis	St. Gilgen: Kienberg, Mondsee-Ufer bei Scharfling (St. Lorenz, OĂ–) â€˘ GE-0025	2006-07-01	2006	481.93	NA	1973-07-27	NA	NA	8928.64
Abrostola_asclepiadis	St. Gilgen: Kienberg, Mondsee-Ufer bei Scharfling (St. Lorenz, OĂ–) â€˘ GE-0025	2012-07-01	2012	481.93	NA	1973-07-27	NA	NA	8928.64
Abrostola_asclepiadis	Muhr: Pfeifenberger â€˘ PG-0090	1975-07-01	1975	1194.51	NA	1984-01-01	NA	NA	7016.32
Abrostola_asclepiadis	Muhr: Pfeifenberger â€˘ PG-0090	1973-07-01	1973	1194.51	NA	1984-01-01	NA	NA	7016.32
Abrostola_asclepiadis	Muhr: Pfeifenberger â€˘ PG-0090	1973-07-01	1973	1194.51	NA	1984-01-01	NA	NA	7016.32
Abrostola_asclepiadis	Muhr: Pfeifenberger â€˘ PG-0090	1976-07-01	1976	1194.51	NA	1984-01-01	NA	NA	7016.32
Abrostola_asclepiadis	Werfen: Eisriesenwelt (Aufstieg) â€˘ POE-0010	2011-07-01	2011	872.61	NA	1982-02-16	NA	NA	72.3608
Abrostola_asclepiadis	Muhr: Pfeifenberger â€˘ PG-0090	2004-07-01	2004	1194.51	NA	1984-01-01	NA	NA	7016.32
Abrostola_asclepiadis	Muhr: Pfeifenberger â€˘ PG-0090	2003-07-01	2003	1194.51	NA	1984-01-01	NA	NA	7016.32
Abrostola_asclepiadis	Salzburg Stadt: Aigen, Parsch â€˘ PG-0208	1956-07-01	1956	432.161	NA	2015-03-17	NA	NA	2878
Abrostola_asclepiadis	Salzburg Stadt: Aigen, Parsch â€˘ PG-0208	1955-07-01	1955	432.161	NA	2015-03-17	NA	NA	2878
Abrostola_asclepiadis	Salzburg Stadt: Aigen, Parsch â€˘ PG-0208	1957-07-01	1957	432.161	NA	2015-03-17	NA	NA	2878
Abrostola_asclepiadis	Salzburg Stadt: Aigen, Parsch â€˘ PG-0208	1956-07-01	1956	432.161	NA	2015-03-17	NA	NA	2878
Abrostola_asclepiadis	St. Johann im Pongau: Hahnbaum	1972-07-01	1972	1231.37	NA	1990-04-27	NA	NA	6752.59
Abrostola_asclepiadis	Muhr: Pfeifenberger â€˘ PG-0090	1973-07-01	1973	1194.51	NA	1984-01-01	NA	NA	7016.32
Abrostola_asclepiadis	Salzburg Stadt: Nonntal, Thumegger Bezirk â€˘ GE-0012	2013-07-01	2013	424.724	NA	2015-03-17	NA	NA	357.071
Abrostola_asclepiadis	Saalbach-Hinterglemm: Lohbach-Tal, Turneralm â€˘ GE-0027	2002-07-01	2002	1398.69	NA	2016-02-01	NA	NA	13823.3
Abrostola_asclepiadis	Koppl: Winkl, "Spechtenschmiede" â€˘ W â€˘ PG-0909	1973-07-01	1973	742.43	NA	1975-09-30	NA	NA	7098.18
Abrostola_asclepiadis	Salzburg Stadt: Gaisberg, Kapaunberg â€˘ PG-0737	1989-07-01	1989	752.263	NA	2015-03-17	NA	NA	4380.04
Abrostola_asclepiadis	MĂĽhlbach am HochkĂ¶nig Ortsgebiet â€˘ PG-0277	1974-07-01	1974	837.71	NA	1983-12-15	NA	NA	3746.93
Abrostola_asclepiadis	GroĂźarltal (ungenau) â€˘ PG-0732	1966-07-01	1966	885.57	NA	1990-04-27	NA	NA	4532.91
Abrostola_asclepiadis	GroĂźgmain: KĂĽhbach-Tal, Veitlbruch â€˘ PG-0221	1987-07-01	1987	632.422	NA	2003-09-19	NA	NA	1829.15
Abrostola_asclepiadis	GroĂźgmain: KĂĽhbach-Tal, Veitlbruch â€˘ PG-0221	1985-07-01	1985	632.422	NA	2003-09-19	NA	NA	1829.15
Abrostola_asclepiadis	Saalfelden am Steinernen Meer: Hohlwegen, StoĂźwand â€˘ FuĂź â€˘ PG-2691	2013-07-01	2013	689.18	NA	1983-12-15	NA	NA	174.537
Abrostola_asclepiadis	Saalfelden am Steinernen Meer: Hohlwegen, StoĂźwand â€˘ FuĂź â€˘ PG-2691	2013-07-01	2013	689.18	NA	1983-12-15	NA	NA	174.537
Abrostola_asclepiadis	Muhr: Pfeifenberger â€˘ PG-0090	2004-07-01	2004	1194.51	NA	1984-01-01	NA	NA	7016.32
Abrostola_asclepiadis	Dorfgastein: Strohlehenalm	2000-07-01	2000	1082.09	NA	1990-04-27	NA	NA	3349.72
Abrostola_asclepiadis	Muhr: Pfeifenberger â€˘ PG-0090	1992-07-01	1992	1194.51	NA	1984-01-01	NA	NA	7016.32
Abrostola_asclepiadis	Muhr: Pfeifenberger â€˘ PG-0090	1983-07-01	1983	1194.51	NA	1984-01-01	NA	NA	7016.32
Abrostola_asclepiadis	Uttendorf: Stubachtal, Schneiderau â€˘ PG-0219	1972-07-01	1972	1006.22	NA	1984-01-01	NA	NA	1399.67
Abrostola_asclepiadis	Rauris: WĂ¶rth â€˘ PG-0025	1975-07-01	1975	958.6	NA	1984-01-01	NA	NA	606.919
Abrostola_asclepiadis	Bad Hofgastein: Angertal â€˘ PG-0271	1997-07-01	1997	1185.1	NA	1984-01-01	NA	NA	6614.49
Abrostola_asclepiadis	St. Gilgen: Schafberg, SautrĂ¤nkalm â€˘ PG-0634	1935-07-01	1935	1022.35	NA	1973-07-27	NA	NA	5169.22
Abrostola_asclepiadis	Pfarrwerfen Ortsgebiet â€˘ PG-0180	1960-07-01	1960	535.08	NA	1982-02-16	NA	NA	3573.97
Abrostola_asclepiadis	Pfarrwerfen Ortsgebiet â€˘ PG-0180	1962-07-01	1962	535.08	NA	1982-02-16	NA	NA	3573.97
Abrostola_asclepiadis	Pfarrwerfen Ortsgebiet â€˘ PG-0180	1962-07-01	1962	535.08	NA	1982-02-16	NA	NA	3573.97
Abrostola_asclepiadis	Koppl: Guggenthal, Kohlhub, Alter Bach NE Kohlhub â€˘ PG-0392	2004-07-01	2004	563.714	NA	2015-03-17	NA	NA	4881.17
Abrostola_asclepiadis	Hallwang: SĂ¶llheim â€˘ PG-0338	1961-07-01	1961	455.046	NA	1980-01-25	NA	NA	5036.4
Abrostola_asclepiadis	Salzburg Stadt: Aigen, Parsch â€˘ PG-0208	1958-07-01	1958	432.161	NA	2015-03-17	NA	NA	2878
Abrostola_asclepiadis	Muhr: Pfeifenberger â€˘ PG-0090	1981-07-01	1981	1194.51	NA	1984-01-01	NA	NA	7016.32
Abrostola_asclepiadis	Muhr: Pfeifenberger â€˘ PG-0090	1974-07-01	1974	1194.51	NA	1984-01-01	NA	NA	7016.32
Abrostola_asclepiadis	Muhr: Pfeifenberger â€˘ PG-0090	1972-07-01	1972	1194.51	NA	1984-01-01	NA	NA	7016.32
Abrostola_asclepiadis	Muhr: Pfeifenberger â€˘ PG-0090	1984-07-01	1984	1194.51	NA	1984-01-01	NA	NA	7016.32
Abrostola_asclepiadis	Salzburg Stadt: Aigen, Parsch â€˘ PG-0208	1959-07-01	1959	432.161	NA	2015-03-17	NA	NA	2878
Abrostola_asclepiadis	Hallwang: SĂ¶llheim â€˘ PG-0338	1957-07-01	1957	455.046	NA	1980-01-25	NA	NA	5036.4
Abrostola_asclepiadis	Salzburg Stadt: MĂ¶nchsberg â€˘ PG-0658	1974-07-01	1974	431.537	NA	2015-03-17	NA	NA	878.234
Abrostola_asclepiadis	Muhr: Pfeifenberger â€˘ PG-0090	1990-07-01	1990	1194.51	NA	1984-01-01	NA	NA	7016.32
Abrostola_asclepiadis	Werfen: Eisriesenwelt-Bergstation / Dr.-Friedrich-Oedl-Haus (Tennengebirge)	1955-07-01	1955	1537.6	NA	1982-02-16	NA	NA	35.8845
Abrostola_asclepiadis	MĂĽhlbach am HochkĂ¶nig: Trockenbach-Tal, Stegmoosalm â€˘ PG-0175	2004-07-01	2004	1445.32	NA	1983-12-15	NA	NA	419.201
Abrostola_asclepiadis	Salzburg Stadt: Gaisberg, Kapaunberg â€˘ PG-0737	1989-07-01	1989	752.263	NA	2015-03-17	NA	NA	4380.04
Abrostola_asclepiadis	GroĂźgmain: KĂĽhbach-Tal, Veitlbruch â€˘ PG-0221	1974-07-01	1974	632.422	NA	2003-09-19	NA	NA	1829.15
Abrostola_asclepiadis	Salzburg Stadt: Gaisberg, Kapaunberg â€˘ PG-0737	1992-07-01	1992	752.263	NA	2015-03-17	NA	NA	4380.04
Abrostola_asclepiadis	Salzburg Stadt: Gaisberg, Kapaunberg â€˘ PG-0737	1989-07-01	1989	752.263	NA	2015-03-17	NA	NA	4380.04
Abrostola_asclepiadis	Salzburg Stadt: MĂ¶nchsberg â€˘ Scheinwerferturm â€˘ PG-2110	1974-07-01	1974	469.68	NA	2015-03-17	NA	NA	1159.75
Abrostola_tripartita	Pfarrwerfen Ortsgebiet â€˘ PG-0180	1959-07-01	1959	535.08	NA	1982-02-16	NA	NA	3573.97
Abrostola_tripartita	Salzburg Stadt: Aigen, Parsch â€˘ PG-0208	1957-07-01	1957	432.161	NA	2015-03-17	NA	NA	2878
Abrostola_tripartita	Salzburg Stadt: Aigen, Parsch â€˘ PG-0208	1954-07-01	1954	432.161	NA	2015-03-17	NA	NA	2878
Abrostola_tripartita	Salzburg Stadt: Aigen, Parsch â€˘ PG-0208	1954-07-01	1954	432.161	NA	2015-03-17	NA	NA	2878
Abrostola_tripartita	Salzburg Stadt: Aigen, Parsch â€˘ PG-0208	1957-07-01	1957	432.161	NA	2015-03-17	NA	NA	2878
Abrostola_tripartita	Salzburg Stadt: Aigen, Parsch â€˘ PG-0208	1954-07-01	1954	432.161	NA	2015-03-17	NA	NA	2878
Abrostola_tripartita	Koppl: Guggenthal, Kohlhub, Alter Bach NE Kohlhub â€˘ PG-0392	2007-07-01	2007	563.714	NA	2015-03-17	NA	NA	4881.17
Abrostola_tripartita	Salzburg Stadt: Aigen, Parsch â€˘ PG-0208	1954-07-01	1954	432.161	NA	2015-03-17	NA	NA	2878
Abrostola_tripartita	Salzburg Stadt: Leopoldskron-Moos, Leopoldskroner Weiher â€˘ GE-0023	1990-07-01	1990	430.626	NA	2015-03-17	NA	NA	51.6804
Abrostola_tripartita	Lofer: Loferbach-Tal, "Steppenhang" â€˘ PG-0420	2009-07-01	2009	643.03	NA	2018-12-31	NA	NA	5143.58
Abrostola_tripartita	Koppl: Guggenthal, Kohlhub, Alter Bach NE Kohlhub â€˘ PG-0392	2009-07-01	2009	563.714	NA	2015-03-17	NA	NA	4881.17
Abrostola_tripartita	Piesendorf: Walchen â€˘ GE-0013	1976-07-01	1976	861.48	NA	2016-02-01	NA	NA	3261.59
Abrostola_tripartita	Saalfelden am Steinernen Meer: Observation-Fundort â€˘ 12,84305/47,42831	2022-07-01	2022	736.61	NA	1983-12-15	NA	NA	3256.56
Abrostola_tripartita	Uttendorf: Stubachtal, Schneiderau, "BĂ¶ndlau" â€˘ GE-0058	1948-07-01	1948	1194.05	NA	1984-01-01	NA	NA	850.975
Abrostola_tripartita	Mauterndorf Ortsgebiet â€˘ PG-0066	1920-07-01	1920	1123.06	NA	2016-02-01	NA	NA	1739.45
Abrostola_tripartita	Uttendorf: Stubachtal, Schneiderau, "BĂ¶ndlau" â€˘ GE-0058	1952-07-01	1952	1194.05	NA	1984-01-01	NA	NA	850.975
Abrostola_tripartita	Uttendorf: Stubachtal, Schneiderau â€˘ PG-0219	1948-07-01	1948	1006.22	NA	1984-01-01	NA	NA	1399.67
Abrostola_tripartita	Rauris Ortsgebiet â€˘ PG-0181	1960-07-01	1960	944	NA	1984-01-01	NA	NA	4527.36
Abrostola_tripartita	Thomatal Ortsgebiet â€˘ PG-0179	1975-07-01	1975	1044.42	NA	2015-03-17	NA	NA	4175.81
Abrostola_tripartita	Rauris: GeiĂźbach-Tal, ObersaghĂ¤usl â€˘ W â€˘ TAV10-AuĂźen-GROP 01	2010-07-01	2010	996.95	NA	1984-01-01	NA	NA	4692.67
Abrostola_tripartita	Salzburg Stadt: MĂ¶nchsberg â€˘ PG-0658	1920-07-01	1920	431.537	NA	2015-03-17	NA	NA	878.234
Abrostola_tripartita	Salzburg Stadt: Aigen, Parsch â€˘ PG-0208	1961-07-01	1961	432.161	NA	2015-03-17	NA	NA	2878
Abrostola_tripartita	Salzburg Stadt: MĂ¶nchsberg, Festungsberg â€˘ PG-1211	1921-07-01	1921	531.551	NA	2015-03-17	NA	NA	662.791
Abrostola_tripartita	GrĂ¶dig: GrĂ¶dig > Glanegg â€˘ PG-0718	1974-07-01	1974	441.71	NA	2015-03-17	NA	NA	1751.03
Abrostola_tripartita	Salzburg Stadt: Aigen, Parsch â€˘ PG-0208	1960-07-01	1960	432.161	NA	2015-03-17	NA	NA	2878
Abrostola_tripartita	Salzburg Stadt: Aigen, Parsch â€˘ PG-0208	1960-07-01	1960	432.161	NA	2015-03-17	NA	NA	2878
Abrostola_tripartita	Salzburg Stadt: Aigen, Parsch â€˘ PG-0208	1961-07-01	1961	432.161	NA	2015-03-17	NA	NA	2878
Abrostola_tripartita	Salzburg Stadt: Aigen, Parsch â€˘ PG-0208	1960-07-01	1960	432.161	NA	2015-03-17	NA	NA	2878
Abrostola_tripartita	St. Gilgen: Kienberg (Mondsee) â€˘ GE-0164	2007-07-01	2007	501.85	NA	1973-07-27	NA	NA	8757.96
Abrostola_tripartita	Salzburg Stadt: Hallwang, Kasern â€˘ PG-0273	1960-07-01	1960	498.487	NA	2015-03-17	NA	NA	5051.82
Abrostola_tripartita	St. Gilgen: Kienberg, Mondsee-Ufer bei Scharfling (St. Lorenz, OĂ–) â€˘ GE-0025	2008-07-01	2008	481.93	NA	1973-07-27	NA	NA	8928.64
Abrostola_tripartita	St. Gilgen: Kienberg, Mondsee-Ufer bei Scharfling (St. Lorenz, OĂ–) â€˘ GE-0025	2008-07-01	2008	481.93	NA	1973-07-27	NA	NA	8928.64
Abrostola_tripartita	St. Georgen bei Salzburg: Roding â€˘ PG-0679	1971-07-01	1971	446.205	NA	2002-12-03	NA	NA	1009.66
Abrostola_tripartita	Salzburg Stadt: MĂ¶nchsberg, Festungsberg â€˘ PG-1211	1912-07-01	1912	531.551	NA	2015-03-17	NA	NA	662.791
Abrostola_tripartita	Salzburg Stadt: Hallwang, Kasern â€˘ PG-0273	1960-07-01	1960	498.487	NA	2015-03-17	NA	NA	5051.82
Abrostola_tripartita	Salzburg Stadt: Hallwang, Kasern â€˘ PG-0273	1960-07-01	1960	498.487	NA	2015-03-17	NA	NA	5051.82
Abrostola_tripartita	Salzburg Stadt: Leopoldskron-Moos, Moor W Gneis / "Gneiser Moor" â€˘ GE-0005	1970-07-01	1970	435.996	NA	2015-03-17	NA	NA	384.555
Abrostola_tripartita	Salzburg Stadt: Leopoldskron-Moos, Moor W Gneis / "Gneiser Moor" â€˘ GE-0005	1970-07-01	1970	435.996	NA	2015-03-17	NA	NA	384.555
Abrostola_tripartita	Salzburg Stadt: MĂ¶nchsberg â€˘ PG-0658	1922-07-01	1922	431.537	NA	2015-03-17	NA	NA	878.234
Abrostola_tripartita	Salzburg Stadt: MĂ¶nchsberg â€˘ PG-0658	1921-07-01	1921	431.537	NA	2015-03-17	NA	NA	878.234
Abrostola_tripartita	Salzburg Stadt: Aigen, Parsch â€˘ PG-0208	1957-07-01	1957	432.161	NA	2015-03-17	NA	NA	2878
Abrostola_tripartita	Salzburg Stadt: Aigen, Parsch â€˘ PG-0208	1957-07-01	1957	432.161	NA	2015-03-17	NA	NA	2878
Abrostola_tripartita	Salzburg Stadt: Aigen, Parsch â€˘ PG-0208	1961-07-01	1961	432.161	NA	2015-03-17	NA	NA	2878
Abrostola_tripartita	GrĂ¶dig: GrĂ¶dig > Glanegg â€˘ PG-0718	1970-07-01	1970	441.71	NA	2015-03-17	NA	NA	1751.03
Abrostola_tripartita	Hallein: Rif â€˘ GE-0191	1962-07-01	1962	434.276	NA	2015-03-17	NA	NA	4967.98
Abrostola_tripartita	Salzburg Stadt: Innere Stadt, Kapuzinerberg â€˘ PG-0736	1974-07-01	1974	623.933	NA	2015-03-17	NA	NA	1992.32
Abrostola_tripartita	Muhr: Pfeifenberger â€˘ PG-0090	1974-07-01	1974	1194.51	NA	1984-01-01	NA	NA	7016.32
Abrostola_tripartita	Saalbach-Hinterglemm: Hinterglemm / hinteres Glemmtal (ungenau) â€˘ PG-0067	1973-07-01	1973	1320.96	NA	2018-12-31	NA	NA	12239.6
Abrostola_tripartita	Muhr: Pfeifenberger â€˘ PG-0090	1993-07-01	1993	1194.51	NA	1984-01-01	NA	NA	7016.32
Abrostola_tripartita	Muhr: Pfeifenberger â€˘ PG-0090	1992-07-01	1992	1194.51	NA	1984-01-01	NA	NA	7016.32
Abrostola_tripartita	Saalbach-Hinterglemm: Hinterglemm / hinteres Glemmtal (ungenau) â€˘ PG-0067	1973-07-01	1973	1320.96	NA	2018-12-31	NA	NA	12239.6
Abrostola_tripartita	Saalbach-Hinterglemm: Hinterglemm / hinteres Glemmtal (ungenau) â€˘ PG-0067	1969-07-01	1969	1320.96	NA	2018-12-31	NA	NA	12239.6
Abrostola_tripartita	Saalbach-Hinterglemm: Hinterglemm / hinteres Glemmtal (ungenau) â€˘ PG-0067	1973-07-01	1973	1320.96	NA	2018-12-31	NA	NA	12239.6
Abrostola_tripartita	Saalbach-Hinterglemm: Hinterglemm / hinteres Glemmtal (ungenau) â€˘ PG-0067	1973-07-01	1973	1320.96	NA	2018-12-31	NA	NA	12239.6
Abrostola_tripartita	Salzburg Stadt: Aigen, Parsch â€˘ PG-0208	1956-07-01	1956	432.161	NA	2015-03-17	NA	NA	2878
Abrostola_tripartita	Salzburg Stadt: Aigen, Parsch â€˘ PG-0208	1954-07-01	1954	432.161	NA	2015-03-17	NA	NA	2878
Abrostola_tripartita	Muhr: Pfeifenberger â€˘ PG-0090	1975-07-01	1975	1194.51	NA	1984-01-01	NA	NA	7016.32
Abrostola_tripartita	Muhr: Pfeifenberger â€˘ PG-0090	1993-07-01	1993	1194.51	NA	1984-01-01	NA	NA	7016.32
Abrostola_tripartita	GroĂźgmain: KĂĽhbach-Tal, Veitlbruch â€˘ PG-0221	1982-07-01	1982	632.422	NA	2003-09-19	NA	NA	1829.15
Abrostola_tripartita	Vigaun: Rengerberg â€˘ PG-0585	1974-07-01	1974	822.59	NA	2007-11-06	NA	NA	2815.54
Abrostola_tripartita	GroĂźgmain: KĂĽhbach-Tal, Veitlbruch â€˘ PG-0221	1974-07-01	1974	632.422	NA	2003-09-19	NA	NA	1829.15
Abrostola_tripartita	GroĂźgmain: KĂĽhbach-Tal, Veitlbruch â€˘ PG-0221	1974-07-01	1974	632.422	NA	2003-09-19	NA	NA	1829.15
Abrostola_tripartita	Koppl: Observation-Fundort â€˘ 13,09383/47,81735	2021-07-01	2021	567.64	NA	2015-03-17	NA	NA	4886.14
Abrostola_tripartita	Koppl: Observation-Fundort â€˘ 13,09359/47,81717	2022-07-01	2022	567.571	NA	2015-03-17	NA	NA	4859.72
Abrostola_tripartita	Schwarzach im Pongau Ortsgebiet â€˘ PG-0633	1961-07-01	1961	595.33	NA	1990-04-27	NA	NA	3088.82
Abrostola_tripartita	Schwarzach im Pongau Ortsgebiet â€˘ PG-0633	1959-07-01	1959	595.33	NA	1990-04-27	NA	NA	3088.82
Abrostola_tripartita	GroĂźgmain: KĂĽhbach-Tal, Veitlbruch â€˘ PG-0221	1981-07-01	1981	632.422	NA	2003-09-19	NA	NA	1829.15
Abrostola_tripartita	GroĂźgmain: KĂĽhbach-Tal, Veitlbruch â€˘ PG-0221	1980-07-01	1980	632.422	NA	2003-09-19	NA	NA	1829.15
Abrostola_tripartita	GroĂźgmain: KĂĽhbach-Tal, Veitlbruch â€˘ PG-0221	1979-07-01	1979	632.422	NA	2003-09-19	NA	NA	1829.15
Abrostola_tripartita	GroĂźgmain: KĂĽhbach-Tal, Veitlbruch â€˘ PG-0221	1981-07-01	1981	632.422	NA	2003-09-19	NA	NA	1829.15
Abrostola_tripartita	GroĂźgmain: KĂĽhbach-Tal, Veitlbruch â€˘ PG-0221	1985-07-01	1985	632.422	NA	2003-09-19	NA	NA	1829.15
Abrostola_tripartita	GroĂźgmain: KĂĽhbach-Tal, Veitlbruch â€˘ PG-0221	1974-07-01	1974	632.422	NA	2003-09-19	NA	NA	1829.15
Abrostola_tripartita	GroĂźgmain: KĂĽhbach-Tal, Veitlbruch â€˘ PG-0221	1976-07-01	1976	632.422	NA	2003-09-19	NA	NA	1829.15
Abrostola_tripartita	GroĂźgmain: KĂĽhbach-Tal, Veitlbruch â€˘ PG-0221	1985-07-01	1985	632.422	NA	2003-09-19	NA	NA	1829.15
Abrostola_tripartita	Seekirchen am Wallersee Ortsgebiet â€˘ PG-0643	1971-07-01	1971	508.587	NA	1973-10-01	NA	NA	1377.44
Abrostola_tripartita	Seekirchen am Wallersee Ortsgebiet â€˘ PG-0643	1971-07-01	1971	508.587	NA	1973-10-01	NA	NA	1377.44
Abrostola_tripartita	Pfarrwerfen Ortsgebiet â€˘ PG-0180	1960-07-01	1960	535.08	NA	1982-02-16	NA	NA	3573.97
Abrostola_tripartita	Pfarrwerfen Ortsgebiet â€˘ PG-0180	1959-07-01	1959	535.08	NA	1982-02-16	NA	NA	3573.97
Abrostola_tripartita	Pfarrwerfen Ortsgebiet â€˘ PG-0180	1960-07-01	1960	535.08	NA	1982-02-16	NA	NA	3573.97
Abrostola_tripartita	Pfarrwerfen Ortsgebiet â€˘ PG-0180	1960-07-01	1960	535.08	NA	1982-02-16	NA	NA	3573.97
Abrostola_tripartita	Pfarrwerfen Ortsgebiet â€˘ PG-0180	1960-07-01	1960	535.08	NA	1982-02-16	NA	NA	3573.97
Abrostola_tripartita	Pfarrwerfen Ortsgebiet â€˘ PG-0180	1960-07-01	1960	535.08	NA	1982-02-16	NA	NA	3573.97
Abrostola_tripartita	Pfarrwerfen Ortsgebiet â€˘ PG-0180	1960-07-01	1960	535.08	NA	1982-02-16	NA	NA	3573.97
Abrostola_tripartita	Uttendorf: Stubachtal, Schneiderau â€˘ PG-0219	1947-07-01	1947	1006.22	NA	1984-01-01	NA	NA	1399.67
Abrostola_tripartita	Rauris: WĂ¶rth â€˘ PG-0025	1963-07-01	1963	958.6	NA	1984-01-01	NA	NA	606.919
Abrostola_tripartita	Uttendorf: Stubachtal, Schneiderau â€˘ PG-0219	1948-07-01	1948	1006.22	NA	1984-01-01	NA	NA	1399.67
Abrostola_tripartita	Maria Alm am Steinernem Meer: Natrun â€˘ GE-0172	2015-07-01	2015	1247.34	NA	1983-12-15	NA	NA	4181.47
Abrostola_tripartita	Maria Alm am Steinernem Meer: Natrun â€˘ GE-0172	2014-07-01	2014	1247.34	NA	1983-12-15	NA	NA	4181.47
Abrostola_tripartita	Maria Alm am Steinernem Meer: Natrun â€˘ GE-0172	2015-07-01	2015	1247.34	NA	1983-12-15	NA	NA	4181.47
Abrostola_tripartita	Maria Alm am Steinernem Meer: Natrun â€˘ GE-0172	2015-07-01	2015	1247.34	NA	1983-12-15	NA	NA	4181.47
Abrostola_tripartita	Mariapfarr Ortsgebiet â€˘ PG-0370	1923-07-01	1923	1111.7	NA	2016-02-01	NA	NA	1402.62
Abrostola_tripartita	Uttendorf: Stubachtal, Schneiderau, "BĂ¶ndlau" â€˘ GE-0058	1949-07-01	1949	1194.05	NA	1984-01-01	NA	NA	850.975
Abrostola_tripartita	Unternberg: Moosham â€˘ PG-0371	1977-07-01	1977	1053.72	NA	2015-03-17	NA	NA	247.522
Abrostola_tripartita	Mariapfarr Ortsgebiet â€˘ PG-0370	1924-07-01	1924	1111.7	NA	2016-02-01	NA	NA	1402.62
Abrostola_tripartita	Thomatal Ortsgebiet â€˘ PG-0179	1974-07-01	1974	1044.42	NA	2015-03-17	NA	NA	4175.81
Abrostola_tripartita	Thomatal Ortsgebiet â€˘ PG-0179	1974-07-01	1974	1044.42	NA	2015-03-17	NA	NA	4175.81
Abrostola_tripartita	Thomatal Ortsgebiet â€˘ PG-0179	1974-07-01	1974	1044.42	NA	2015-03-17	NA	NA	4175.81
Abrostola_tripartita	Koppl: Winkl, "Spechtenschmiede" â€˘ W â€˘ PG-0909	1976-07-01	1976	742.43	NA	1975-09-30	NA	NA	7098.18
Abrostola_tripartita	Koppl: Winkl, "Spechtenschmiede" â€˘ W â€˘ PG-0909	1974-07-01	1974	742.43	NA	1975-09-30	NA	NA	7098.18
Abrostola_tripartita	Zell am See Ortsgebiet â€˘ PG-0780	1949-07-01	1949	759.13	NA	1972-12-28	NA	NA	1238.34
Abrostola_tripartita	Saalfelden am Steinernen Meer: Observation-Fundort â€˘ 12,84313/47,42822	2020-07-01	2020	736.38	NA	1983-12-15	NA	NA	3259.77
Abrostola_tripartita	Abtenau Ortsgebiet â€˘ PG-0354	1929-07-01	1929	714.61	NA	1982-02-16	NA	NA	2658.48
Abrostola_tripartita	Abtenau Ortsgebiet â€˘ PG-0354	1929-07-01	1929	714.61	NA	1982-02-16	NA	NA	2658.48
Abrostola_tripartita	Koppl: Winkl, "Spechtenschmiede" â€˘ W â€˘ PG-0909	1978-07-01	1978	742.43	NA	1975-09-30	NA	NA	7098.18
Abrostola_tripartita	Koppl: Winkl, "Spechtenschmiede" â€˘ W â€˘ PG-0909	1973-07-01	1973	742.43	NA	1975-09-30	NA	NA	7098.18
Abrostola_tripartita	MĂĽhlbach am HochkĂ¶nig Ortsgebiet â€˘ PG-0277	1970-07-01	1970	837.71	NA	1983-12-15	NA	NA	3746.93
Abrostola_tripartita	Hollersbach im Pinzgau (ungenau) â€˘ "Steinbruch" â€˘ GE-0089	1992-07-01	1992	821.95	NA	1984-01-01	NA	NA	2409.97
Abrostola_tripartita	Maria Alm am Steinernem Meer: Natrun â€˘ GE-0172	2014-07-01	2014	1247.34	NA	1983-12-15	NA	NA	4181.47
Abrostola_tripartita	Bad Gastein: Badberg â€˘ PG-1263	1996-07-01	1996	1048.97	NA	1984-01-01	NA	NA	1953.85
Abrostola_tripartita	Zell am See Ortsgebiet â€˘ PG-0780	1950-07-01	1950	759.13	NA	1972-12-28	NA	NA	1238.34
Abrostola_tripartita	Zell am See Ortsgebiet â€˘ PG-0780	1950-07-01	1950	759.13	NA	1972-12-28	NA	NA	1238.34
Abrostola_tripartita	Faistenau: Tiefbrunnau, KĂĽhleiten / "KĂĽhleitenalm" â€˘ GE-0018	1975-07-01	1975	909.45	NA	2016-02-01	NA	NA	7570.21
Abrostola_tripartita	Kaprun: Filzmoos â€˘ PG-1280	1992-07-01	1992	756.22	NA	1972-12-28	NA	NA	2534.41
Abrostola_tripartita	Salzburg Stadt: Aigen, Parsch â€˘ PG-0208	1957-07-01	1957	432.161	NA	2015-03-17	NA	NA	2878
Abrostola_tripartita	Bergheim: Siggerwiesen â€˘ GE-0007	1992-07-01	1992	404.164	NA	2002-12-03	NA	NA	904.384
Abrostola_tripartita	Salzburg Stadt: Leopoldskron-Moos, Moor W Gneis / "Gneiser Moor" â€˘ GE-0005	1970-07-01	1970	435.996	NA	2015-03-17	NA	NA	384.555
Abrostola_tripartita	Salzburg Stadt: Aigen, Parsch â€˘ PG-0208	1959-07-01	1959	432.161	NA	2015-03-17	NA	NA	2878
Abrostola_tripartita	WeiĂźbach bei Lofer: DieĂźbach-Tal, DieĂźbachstausee â€˘ W â€˘ PG-1341	2003-07-01	2003	1399.81	NA	1983-12-15	NA	NA	129.19
Abrostola_tripartita	WeiĂźbach bei Lofer: DieĂźbach-Tal, DieĂźbachstausee â€˘ W â€˘ PG-1341	2003-07-01	2003	1399.81	NA	1983-12-15	NA	NA	129.19
Abrostola_tripartita	Salzburg Stadt (ungenau) â€˘ 410-435 m â€˘ PG-0346	1956-07-01	1956	423.869	NA	2015-03-17	NA	NA	866.906
Abrostola_tripartita	Salzburg Stadt (ungenau) â€˘ 410-435 m â€˘ PG-0346	1952-07-01	1952	423.869	NA	2015-03-17	NA	NA	866.906
Abrostola_tripartita	Bergheim: Plainberg â€˘ PG-0337	1959-07-01	1959	501.429	NA	2002-12-03	NA	NA	4519.79
Abrostola_tripartita	Bergheim: Plainberg â€˘ PG-0337	1959-07-01	1959	501.429	NA	2002-12-03	NA	NA	4519.79
Abrostola_tripartita	Salzburg Stadt: Aigen â€˘ PG-0355	1968-07-01	1968	433.096	NA	2015-03-17	NA	NA	3422.92
Abrostola_tripartita	Salzburg Stadt: Aigen â€˘ PG-0355	1967-07-01	1967	433.096	NA	2015-03-17	NA	NA	3422.92
Abrostola_tripartita	Hallwang: SĂ¶llheim â€˘ PG-0338	1961-07-01	1961	455.046	NA	1980-01-25	NA	NA	5036.4
Abrostola_tripartita	Salzburg Stadt: MĂ¶nchsberg, Festungsberg â€˘ PG-1211	1918-07-01	1918	531.551	NA	2015-03-17	NA	NA	662.791
Abrostola_tripartita	Saalbach-Hinterglemm: Hinterglemm / hinteres Glemmtal (ungenau) â€˘ PG-0067	1973-07-01	1973	1320.96	NA	2018-12-31	NA	NA	12239.6
Abrostola_tripartita	Saalbach-Hinterglemm: Hinterglemm / hinteres Glemmtal (ungenau) â€˘ PG-0067	1970-07-01	1970	1320.96	NA	2018-12-31	NA	NA	12239.6
Abrostola_tripartita	Saalbach-Hinterglemm: Hinterglemm / hinteres Glemmtal (ungenau) â€˘ PG-0067	1973-07-01	1973	1320.96	NA	2018-12-31	NA	NA	12239.6
Abrostola_tripartita	Saalbach-Hinterglemm: Hinterglemm / hinteres Glemmtal (ungenau) â€˘ PG-0067	1973-07-01	1973	1320.96	NA	2018-12-31	NA	NA	12239.6
Abrostola_tripartita	Mauterndorf Ortsgebiet â€˘ PG-0066	1921-07-01	1921	1123.06	NA	2016-02-01	NA	NA	1739.45
Abrostola_tripartita	Mauterndorf Ortsgebiet â€˘ PG-0066	1922-07-01	1922	1123.06	NA	2016-02-01	NA	NA	1739.45
Abrostola_tripartita	Saalbach-Hinterglemm: Hinterglemm / hinteres Glemmtal (ungenau) â€˘ PG-0067	1970-07-01	1970	1320.96	NA	2018-12-31	NA	NA	12239.6
Abrostola_tripartita	Dorfgastein: Strohlehenalm	2000-07-01	2000	1082.09	NA	1990-04-27	NA	NA	3349.72
Abrostola_tripartita	Muhr: Pfeifenberger â€˘ PG-0090	1977-07-01	1977	1194.51	NA	1984-01-01	NA	NA	7016.32
Abrostola_tripartita	Muhr: Pfeifenberger â€˘ PG-0090	1973-07-01	1973	1194.51	NA	1984-01-01	NA	NA	7016.32
Abrostola_tripartita	WeiĂźbach bei Lofer: DieĂźbach-Tal, DieĂźbachstausee â€˘ W â€˘ PG-1341	2003-07-01	2003	1399.81	NA	1983-12-15	NA	NA	129.19
Abrostola_tripartita	Vigaun: Schlenken â€˘ PG-0259	1976-07-01	1976	1564.83	NA	2007-11-06	NA	NA	4733.4
Abrostola_tripartita	Saalbach-Hinterglemm: Hinterglemm / hinteres Glemmtal (ungenau) â€˘ PG-0067	1973-07-01	1973	1320.96	NA	2018-12-31	NA	NA	12239.6
Abrostola_tripartita	Muhr: Pfeifenberger â€˘ PG-0090	1990-07-01	1990	1194.51	NA	1984-01-01	NA	NA	7016.32
Abrostola_tripartita	Muhr: Pfeifenberger â€˘ PG-0090	1990-07-01	1990	1194.51	NA	1984-01-01	NA	NA	7016.32
Abrostola_tripartita	Maria Alm am Steinernem Meer: Natrun â€˘ GE-0172	2016-07-01	2016	1247.34	NA	1983-12-15	NA	NA	4181.47
Abrostola_tripartita	Maria Alm am Steinernem Meer: Natrun â€˘ GE-0172	2016-07-01	2016	1247.34	NA	1983-12-15	NA	NA	4181.47
Abrostola_tripartita	Uttendorf: Stubachtal, Schneiderau â€˘ PG-0219	1973-07-01	1973	1006.22	NA	1984-01-01	NA	NA	1399.67
Abrostola_tripartita	Uttendorf: Stubachtal, Wirtenbach-MĂĽndung â€˘ GE-0001	1953-07-01	1953	806.34	NA	2018-12-31	NA	NA	5362.2
Abrostola_tripartita	Leogang Ortsgebiet â€˘ PG-0065	1912-07-01	1912	793.02	NA	1983-12-15	NA	NA	7432.94
Abrostola_tripartita	Hollersbach im Pinzgau (ungenau) â€˘ "Steinbruch" â€˘ GE-0089	1992-07-01	1992	821.95	NA	1984-01-01	NA	NA	2409.97
Abrostola_tripartita	Fusch an der GroĂźglocknerstraĂźe: Observation-Fundort â€˘ 12,82919/47,23141	2021-07-01	2021	831.76	NA	1984-01-01	NA	NA	2554.48
Abrostola_tripartita	Saalbach-Hinterglemm: Hinterglemm / hinteres Glemmtal (ungenau) â€˘ PG-0067	1978-07-01	1978	1320.96	NA	2018-12-31	NA	NA	12239.6
Abrostola_tripartita	Maria Alm/Steinernen Meer: Natrun, Wh. Natrun â€˘ SE â€˘ PG-3119	2016-07-01	2016	1096.35	NA	1983-12-15	NA	NA	4243.48
Abrostola_tripartita	Muhr: Pfeifenberger â€˘ PG-0090	2004-07-01	2004	1194.51	NA	1984-01-01	NA	NA	7016.32
Abrostola_tripartita	Saalbach-Hinterglemm: Hinterglemm / hinteres Glemmtal (ungenau) â€˘ PG-0067	1969-07-01	1969	1320.96	NA	2018-12-31	NA	NA	12239.6
Abrostola_tripartita	Mauterndorf Ortsgebiet â€˘ PG-0066	1920-07-01	1920	1123.06	NA	2016-02-01	NA	NA	1739.45
Abrostola_tripartita	St. Martin am Tennengebirge: LungĂ¶tz, Lammertal, Scharfer Steig â€˘ 1040-1120 m â€˘ PG-2479	2010-07-01	2010	1059.44	NA	1982-02-16	NA	NA	199.568
Abrostola_tripartita	Maria Alm/Steinernen Meer: Natrun, Wh. Natrun â€˘ SE â€˘ PG-3119	2017-07-01	2017	1096.35	NA	1983-12-15	NA	NA	4243.48
Abrostola_tripartita	Maria Alm/Steinernen Meer: Natrun, Wh. Natrun â€˘ SE â€˘ PG-3119	2016-07-01	2016	1096.35	NA	1983-12-15	NA	NA	4243.48
Abrostola_tripartita	Koppl: Guggenthal, Kohlhub, Alter Bach NE Kohlhub â€˘ PG-0392	2015-07-01	2015	563.714	NA	2015-03-17	NA	NA	4881.17
Abrostola_tripartita	Pfarrwerfen Ortsgebiet â€˘ PG-0180	1962-07-01	1962	535.08	NA	1982-02-16	NA	NA	3573.97
Abrostola_tripartita	Abtenau Ortsgebiet â€˘ PG-0354	1929-07-01	1929	714.61	NA	1982-02-16	NA	NA	2658.48
Abrostola_tripartita	Salzburg Stadt: Gaisberg, Kapaunberg â€˘ PG-0737	1989-07-01	1989	752.263	NA	2015-03-17	NA	NA	4380.04
Abrostola_tripartita	Koppl: Winkl, "Spechtenschmiede" â€˘ W â€˘ PG-0909	1974-07-01	1974	742.43	NA	1975-09-30	NA	NA	7098.18
Abrostola_tripartita	Koppl: Winkl, "Spechtenschmiede" â€˘ W â€˘ PG-0909	1974-07-01	1974	742.43	NA	1975-09-30	NA	NA	7098.18
Abrostola_tripartita	Ebenau: Hinterwinkl, WeiĂźbach-Tal, Taleingang â€˘ PG-0292	1974-07-01	1974	588.94	NA	1975-09-30	NA	NA	6983.53
Abrostola_tripartita	Koppl: Guggenthal, Kohlhub, Alter Bach NE Kohlhub â€˘ PG-0392	2015-07-01	2015	563.714	NA	2015-03-17	NA	NA	4881.17
Abrostola_tripartita	GroĂźgmain: KĂĽhbach-Tal, Veitlbruch â€˘ PG-0221	1992-07-01	1992	632.422	NA	2003-09-19	NA	NA	1829.15
Abrostola_tripartita	GroĂźgmain: KĂĽhbach-Tal, Veitlbruch â€˘ PG-0221	1981-07-01	1981	632.422	NA	2003-09-19	NA	NA	1829.15
Abrostola_tripartita	Salzburg Stadt: Riedenburg, Rainberg â€˘ PG-0381	1994-07-01	1994	445.517	NA	2015-03-17	NA	NA	711.944
Abrostola_tripartita	Salzburg Stadt: Aigen, Parsch â€˘ PG-0208	1961-07-01	1961	432.161	NA	2015-03-17	NA	NA	2878
Abrostola_tripartita	Hallwang: SĂ¶llheim â€˘ PG-0338	1957-07-01	1957	455.046	NA	1980-01-25	NA	NA	5036.4
Abrostola_tripartita	Salzburg Stadt: Leopoldskron-Moos, Leopoldskroner Weiher â€˘ GE-0023	1982-07-01	1982	430.626	NA	2015-03-17	NA	NA	51.6804
Abrostola_tripartita	Salzburg Stadt: Leopoldskron-Moos, Leopoldskroner Weiher â€˘ GE-0023	1982-07-01	1982	430.626	NA	2015-03-17	NA	NA	51.6804
Abrostola_tripartita	Salzburg Stadt: Leopoldskron-Moos, Leopoldskroner Weiher â€˘ GE-0023	1982-07-01	1982	430.626	NA	2015-03-17	NA	NA	51.6804
Abrostola_tripartita	Rauris Ortsgebiet â€˘ PG-0181	1965-07-01	1965	944	NA	1984-01-01	NA	NA	4527.36
Abrostola_tripartita	Muhr: Pfeifenberger â€˘ PG-0090	2004-07-01	2004	1194.51	NA	1984-01-01	NA	NA	7016.32
Abrostola_tripartita	Koppl: Winkl, "Spechtenschmiede" â€˘ W â€˘ PG-0909	1973-07-01	1973	742.43	NA	1975-09-30	NA	NA	7098.18
Abrostola_tripartita	Muhr: Pfeifenberger â€˘ PG-0090	1981-07-01	1981	1194.51	NA	1984-01-01	NA	NA	7016.32
Abrostola_tripartita	Muhr: Pfeifenberger â€˘ PG-0090	1974-07-01	1974	1194.51	NA	1984-01-01	NA	NA	7016.32
Abrostola_tripartita	Muhr: Pfeifenberger â€˘ PG-0090	1992-07-01	1992	1194.51	NA	1984-01-01	NA	NA	7016.32
Abrostola_tripartita	Muhr: Pfeifenberger â€˘ PG-0090	1990-07-01	1990	1194.51	NA	1984-01-01	NA	NA	7016.32
Abrostola_tripartita	Kleinarl: Tappenkar-Gebiet, Tappenkarsee â€˘ PG-0129	1954-07-01	1954	1762.46	NA	2016-02-01	NA	NA	4495.75
Abrostola_tripartita	Rauris: GroĂźglocknerstraĂźe, MittertĂ¶rl â€˘ PG-0003	1995-07-01	1995	2260.57	NA	1984-01-01	NA	NA	68.7506
Abrostola_tripartita	Kaprun: Kapruner Achental, LĂ¤rchwand â€˘ GE-0002	1965-07-01	1965	1539.5	NA	1984-01-01	NA	NA	1277.37
Abrostola_tripartita	Krimml: Wildgerlostal, Leitenkammerklamm â€˘ TAV08-Zone 1-DEUH 02	2008-07-01	2008	1549.14	NA	1984-01-01	NA	NA	38.5714
Abrostola_tripartita	Zederhaus: Riedingtal (ungenau) â€˘ Hinteres Riedingtal â€˘ PG-0184	1969-07-01	1969	1822.32	NA	2016-02-01	NA	NA	971.143
Abrostola_tripartita	Salzburg Stadt: Aigen, Parsch â€˘ PG-0208	1958-07-01	1958	432.161	NA	2015-03-17	NA	NA	2878
Abrostola_tripartita	Salzburg Stadt: Aigen â€˘ PG-0355	1967-07-01	1967	433.096	NA	2015-03-17	NA	NA	3422.92
Abrostola_tripartita	Muhr: Pfeifenberger â€˘ PG-0090	1993-07-01	1993	1194.51	NA	1984-01-01	NA	NA	7016.32
Abrostola_tripartita	Muhr: Pfeifenberger â€˘ PG-0090	1972-07-01	1972	1194.51	NA	1984-01-01	NA	NA	7016.32
Abrostola_tripartita	Muhr: Pfeifenberger â€˘ PG-0090	1981-07-01	1981	1194.51	NA	1984-01-01	NA	NA	7016.32
Abrostola_tripartita	Muhr: Pfeifenberger â€˘ PG-0090	1974-07-01	1974	1194.51	NA	1984-01-01	NA	NA	7016.32
Abrostola_tripartita	Salzburg Stadt: Nonntal, Thumegger Bezirk â€˘ GE-0012	1996-07-01	1996	424.724	NA	2015-03-17	NA	NA	357.071
Abrostola_tripartita	Bischofshofen Ortsgebiet â€˘ PG-0626	1958-07-01	1958	545.94	NA	1983-12-15	NA	NA	5656.15
Abrostola_triplasia	Salzburg Stadt (ungenau) â€˘ 410-435 m â€˘ PG-0346	1952-07-01	1952	423.869	NA	2015-03-17	NA	NA	866.906
Abrostola_triplasia	Salzburg Stadt: Aigen, Parsch â€˘ PG-0208	1955-07-01	1955	432.161	NA	2015-03-17	NA	NA	2878
Abrostola_triplasia	Salzburg Stadt: Aigen, Parsch â€˘ PG-0208	1954-07-01	1954	432.161	NA	2015-03-17	NA	NA	2878
Abrostola_triplasia	Hallwang Ortsgebiet â€˘ PG-0330	1939-07-01	1939	509.733	NA	1980-01-25	NA	NA	3857.03
Abrostola_triplasia	Salzburg Stadt (ungenau) â€˘ 410-435 m â€˘ PG-0346	1922-07-01	1922	423.869	NA	2015-03-17	NA	NA	866.906
Abrostola_triplasia	Salzburg Stadt: Aigen, Parsch â€˘ PG-0208	1960-07-01	1960	432.161	NA	2015-03-17	NA	NA	2878
Abrostola_triplasia	Salzburg Stadt: Aigen, Parsch â€˘ PG-0208	1960-07-01	1960	432.161	NA	2015-03-17	NA	NA	2878
Abrostola_triplasia	Salzburg Stadt: Leopoldskron-Moos, Moor W Gneis / "Gneiser Moor" â€˘ GE-0005	1993-07-01	1993	435.996	NA	2015-03-17	NA	NA	384.555
Abrostola_triplasia	Salzburg Stadt: Aigen, Parsch â€˘ PG-0208	1961-07-01	1961	432.161	NA	2015-03-17	NA	NA	2878
Abrostola_triplasia	Salzburg Stadt: Aigen, Parsch â€˘ PG-0208	1956-07-01	1956	432.161	NA	2015-03-17	NA	NA	2878
Abrostola_triplasia	Salzburg Stadt: Aigen, Parsch â€˘ PG-0208	1955-07-01	1955	432.161	NA	2015-03-17	NA	NA	2878
Abrostola_triplasia	Salzburg Stadt: Aigen, Parsch â€˘ PG-0208	1959-07-01	1959	432.161	NA	2015-03-17	NA	NA	2878
Abrostola_triplasia	Salzburg Stadt: Aigen, Parsch â€˘ PG-0208	1958-07-01	1958	432.161	NA	2015-03-17	NA	NA	2878
Abrostola_triplasia	Salzburg - Rainberg: Observation-Fundort â€˘ 13,03566/47,79473	2022-07-01	2022	452.07	NA	2015-03-17	NA	NA	644.824
Abrostola_triplasia	Salzburg - Rainberg: Observation-Fundort â€˘ 13,03556/47,79472	2022-07-01	2022	445.886	NA	2015-03-17	NA	NA	649.461
Abrostola_triplasia	Salzburg - Rainberg: Observation-Fundort â€˘ 13,03573/47,79478	2022-07-01	2022	447.629	NA	2015-03-17	NA	NA	644.969
Abrostola_triplasia	Salzburg - Rainberg: Observation-Fundort â€˘ 13,03566/47,79473	2022-07-01	2022	452.07	NA	2015-03-17	NA	NA	644.824
Abrostola_triplasia	Hallwang: SĂ¶llheim â€˘ PG-0338	1957-07-01	1957	455.046	NA	1980-01-25	NA	NA	5036.4
Abrostola_triplasia	Wals-Siezenheim: Viehhausen â€˘ PG-0340	1976-07-01	1976	436.084	NA	1976-10-29	NA	NA	1934.29
Abrostola_triplasia	Hallwang Ortsgebiet â€˘ PG-0330	1946-07-01	1946	509.733	NA	1980-01-25	NA	NA	3857.03
Abrostola_triplasia	Koppl: Guggenthal, Kohlhub, Alter Bach NE Kohlhub â€˘ PG-0392	2009-07-01	2009	563.714	NA	2015-03-17	NA	NA	4881.17
Abrostola_triplasia	Saalfelden am Steinernen Meer: Observation-Fundort â€˘ 12,82531/47,40310	2021-07-01	2021	742.82	NA	1983-12-15	NA	NA	6287.32
Abrostola_triplasia	Salzburg Stadt (ungenau) â€˘ 410-435 m â€˘ PG-0346	1929-07-01	1929	423.869	NA	2015-03-17	NA	NA	866.906
Abrostola_triplasia	Eugendorf Ortsgebiet â€˘ PG-0200	1952-07-01	1952	556.879	NA	1973-10-01	NA	NA	3888.41
Abrostola_triplasia	Koppl: Guggenthal, Kohlhub, Alter Bach NE Kohlhub â€˘ PG-0392	2010-07-01	2010	563.714	NA	2015-03-17	NA	NA	4881.17
Abrostola_triplasia	Saalfelden am Steinernen Meer: Observation-Fundort â€˘ 12,82541/47,40353	2021-07-01	2021	738.72	NA	1983-12-15	NA	NA	6244.93
Abrostola_triplasia	Koppl: Observation-Fundort â€˘ 13,09353/47,81717	2020-07-01	2020	567.331	NA	2015-03-17	NA	NA	4856.14
Abrostola_triplasia	Anif: Waldbad Anif â€˘ PG-1764	2010-07-01	2010	431.141	NA	2015-03-17	NA	NA	4306.45
Abrostola_triplasia	Salzburg Stadt: MĂ¶nchsberg â€˘ PG-0658	1955-07-01	1955	431.537	NA	2015-03-17	NA	NA	878.234
Abrostola_triplasia	Salzburg Stadt: Innere Stadt, Kapuzinerberg â€˘ PG-0736	1975-07-01	1975	623.933	NA	2015-03-17	NA	NA	1992.32
Abrostola_triplasia	Salzburg Stadt: MĂ¶nchsberg, Festungsberg â€˘ PG-1211	1918-07-01	1918	531.551	NA	2015-03-17	NA	NA	662.791
Abrostola_triplasia	Salzburg Stadt: Aigen â€˘ PG-0355	1967-07-01	1967	433.096	NA	2015-03-17	NA	NA	3422.92
Abrostola_triplasia	Salzburg Stadt: Aigen â€˘ PG-0355	1968-07-01	1968	433.096	NA	2015-03-17	NA	NA	3422.92
Abrostola_triplasia	Salzburg Stadt: Riedenburg, Rainberg â€˘ PG-0381	1993-07-01	1993	445.517	NA	2015-03-17	NA	NA	711.944
Abrostola_triplasia	Salzburg Stadt: Riedenburg, Rainberg â€˘ PG-0381	1993-07-01	1993	445.517	NA	2015-03-17	NA	NA	711.944
Abrostola_triplasia	Salzburg Stadt: Hallwang, Kasern â€˘ PG-0273	1960-07-01	1960	498.487	NA	2015-03-17	NA	NA	5051.82
Abrostola_triplasia	Salzburg Stadt: Hallwang, Kasern â€˘ PG-0273	1958-07-01	1958	498.487	NA	2015-03-17	NA	NA	5051.82
Abrostola_triplasia	Salzburg Stadt: Hallwang, Kasern â€˘ PG-0273	1960-07-01	1960	498.487	NA	2015-03-17	NA	NA	5051.82
Abrostola_triplasia	Hallwang: SĂ¶llheim â€˘ PG-0338	1960-07-01	1960	455.046	NA	1980-01-25	NA	NA	5036.4
Abrostola_triplasia	Hallwang: SĂ¶llheim â€˘ PG-0338	1956-07-01	1956	455.046	NA	1980-01-25	NA	NA	5036.4
Abrostola_triplasia	Salzburg Stadt: Hallwang, Kasern â€˘ PG-0273	1953-07-01	1953	498.487	NA	2015-03-17	NA	NA	5051.82
Abrostola_triplasia	GĂ¶ming: Observation-Fundort â€˘ 12,95357/47,9613	2022-07-01	2022	444.579	NA	2002-12-03	NA	NA	2214.47
Abrostola_triplasia	Hallwang: SĂ¶llheim â€˘ PG-0338	1954-07-01	1954	455.046	NA	1980-01-25	NA	NA	5036.4
Abrostola_triplasia	Salzburg Stadt: MĂ¶nchsberg â€˘ PG-0658	1951-07-01	1951	431.537	NA	2015-03-17	NA	NA	878.234
Abrostola_triplasia	Hallwang: SĂ¶llheim â€˘ PG-0338	1967-07-01	1967	455.046	NA	1980-01-25	NA	NA	5036.4
Abrostola_triplasia	Hallwang: SĂ¶llheim â€˘ PG-0338	1955-07-01	1955	455.046	NA	1980-01-25	NA	NA	5036.4
Abrostola_triplasia	Salzburg Stadt: Aigen â€˘ PG-0355	1954-07-01	1954	433.096	NA	2015-03-17	NA	NA	3422.92
Abrostola_triplasia	Salzburg Stadt: Leopoldskron-Moos, Moor W Gneis / "Gneiser Moor" â€˘ GE-0005	1993-07-01	1993	435.996	NA	2015-03-17	NA	NA	384.555
Abrostola_triplasia	Salzburg Stadt: Riedenburg, NeutorstraĂźe â€˘ PG-1152	1924-07-01	1924	429.289	NA	2015-03-17	NA	NA	950.893
Abrostola_triplasia	Salzburg Stadt: Aigen â€˘ PG-0355	1967-07-01	1967	433.096	NA	2015-03-17	NA	NA	3422.92
Abrostola_triplasia	Hallwang Ortsgebiet â€˘ PG-0330	1946-07-01	1946	509.733	NA	1980-01-25	NA	NA	3857.03
Abrostola_triplasia	Golling an der Salzach Ortsgebiet â€˘ PG-0225	1938-07-01	1938	467.92	NA	2002-12-03	NA	NA	1771.24
Abrostola_triplasia	Salzburg Stadt: Hallwang, Kasern â€˘ PG-0273	1955-07-01	1955	498.487	NA	2015-03-17	NA	NA	5051.82
Abrostola_triplasia	Golling an der Salzach: ObergĂ¤u, Luegwinkl â€˘ PG-1322	2005-07-01	2005	474.54	NA	1983-12-15	NA	NA	2352.07
Abrostola_triplasia	Golling an der Salzach: ObergĂ¤u, Luegwinkl â€˘ PG-1322	2005-07-01	2005	474.54	NA	1983-12-15	NA	NA	2352.07
Abrostola_triplasia	Salzburg Stadt: Nonntal, Thumegger Bezirk â€˘ GE-0012	1972-07-01	1972	424.724	NA	2015-03-17	NA	NA	357.071
Abrostola_triplasia	Salzburg Stadt: Aigen, Parsch â€˘ PG-0208	1954-07-01	1954	432.161	NA	2015-03-17	NA	NA	2878
Abrostola_triplasia	Salzburg Stadt: Aigen, Parsch â€˘ PG-0208	1954-07-01	1954	432.161	NA	2015-03-17	NA	NA	2878
Abrostola_triplasia	Salzburg Stadt (ungenau) â€˘ 410-435 m â€˘ PG-0346	1930-07-01	1930	423.869	NA	2015-03-17	NA	NA	866.906
Abrostola_triplasia	Salzburg Stadt (ungenau) â€˘ 410-435 m â€˘ PG-0346	1930-07-01	1930	423.869	NA	2015-03-17	NA	NA	866.906
Abrostola_triplasia	Salzburg Stadt: Leopoldskron-Moos, Leopoldskroner Weiher â€˘ GE-0023	1980-07-01	1980	430.626	NA	2015-03-17	NA	NA	51.6804
Abrostola_triplasia	Salzburg Stadt (ungenau) â€˘ 410-435 m â€˘ PG-0346	1930-07-01	1930	423.869	NA	2015-03-17	NA	NA	866.906
Abrostola_triplasia	Salzburg Stadt: Aigen, Parsch â€˘ PG-0208	1960-07-01	1960	432.161	NA	2015-03-17	NA	NA	2878
Abrostola_triplasia	Salzburg Stadt: Aigen, Parsch â€˘ PG-0208	1960-07-01	1960	432.161	NA	2015-03-17	NA	NA	2878
Abrostola_triplasia	Salzburg Stadt: Leopoldskron-Moos, Moor W Gneis / "Gneiser Moor" â€˘ GE-0005	1970-07-01	1970	435.996	NA	2015-03-17	NA	NA	384.555
Abrostola_triplasia	Salzburg Stadt: Aigen, Parsch â€˘ PG-0208	1962-07-01	1962	432.161	NA	2015-03-17	NA	NA	2878
Abrostola_triplasia	Salzburg Stadt: Aigen, Parsch â€˘ PG-0208	1958-07-01	1958	432.161	NA	2015-03-17	NA	NA	2878
Abrostola_triplasia	Salzburg Stadt: Aigen, Parsch â€˘ PG-0208	1958-07-01	1958	432.161	NA	2015-03-17	NA	NA	2878
Abrostola_triplasia	Salzburg Stadt: Aigen, Parsch â€˘ PG-0208	1960-07-01	1960	432.161	NA	2015-03-17	NA	NA	2878
Abrostola_triplasia	Salzburg Stadt: Aigen, Parsch â€˘ PG-0208	1959-07-01	1959	432.161	NA	2015-03-17	NA	NA	2878
Abrostola_triplasia	Salzburg Stadt: Aigen, Parsch â€˘ PG-0208	1962-07-01	1962	432.161	NA	2015-03-17	NA	NA	2878
Abrostola_triplasia	Salzburg Stadt: Aigen, Parsch â€˘ PG-0208	1962-07-01	1962	432.161	NA	2015-03-17	NA	NA	2878
Abrostola_triplasia	Salzburg Stadt: Aigen, Parsch â€˘ PG-0208	1962-07-01	1962	432.161	NA	2015-03-17	NA	NA	2878
Abrostola_triplasia	Salzburg Stadt: Aigen, Parsch â€˘ PG-0208	1962-07-01	1962	432.161	NA	2015-03-17	NA	NA	2878
Abrostola_triplasia	Salzburg Stadt: Aigen, Parsch â€˘ PG-0208	1954-07-01	1954	432.161	NA	2015-03-17	NA	NA	2878
Abrostola_triplasia	Salzburg Stadt: Aigen, Parsch â€˘ PG-0208	1961-07-01	1961	432.161	NA	2015-03-17	NA	NA	2878
Abrostola_triplasia	Salzburg Stadt: Aigen, Parsch â€˘ PG-0208	1958-07-01	1958	432.161	NA	2015-03-17	NA	NA	2878
Abrostola_triplasia	Salzburg Stadt: Gaisberg, Kapaunberg â€˘ PG-0737	1989-07-01	1989	752.263	NA	2015-03-17	NA	NA	4380.04
Abrostola_triplasia	Hallwang: SĂ¶llheim â€˘ PG-0338	1960-07-01	1960	455.046	NA	1980-01-25	NA	NA	5036.4
Abrostola_triplasia	Salzburg Stadt: Leopoldskron-Moos, Moor W Gneis / "Gneiser Moor" â€˘ GE-0005	1970-07-01	1970	435.996	NA	2015-03-17	NA	NA	384.555
Abrostola_triplasia	Golling an der Salzach Ortsgebiet â€˘ PG-0225	1949-07-01	1949	467.92	NA	2002-12-03	NA	NA	1771.24
Abrostola_triplasia	Hallwang: SĂ¶llheim â€˘ PG-0338	1961-07-01	1961	455.046	NA	1980-01-25	NA	NA	5036.4
Abrostola_triplasia	Koppl: Winkl, "Spechtenschmiede" â€˘ W â€˘ PG-0909	1974-07-01	1974	742.43	NA	1975-09-30	NA	NA	7098.18
Abrostola_triplasia	St. Gilgen: FĂĽrberg, Falkenstein-Weg, "Scheffelblick" â€˘ PG-1325	2009-07-01	2009	693.45	NA	1973-07-27	NA	NA	5170.46
Abrostola_triplasia	Werfen: Observation-Fundort â€˘ 13,17308/47,43313	2020-07-01	2020	938.94	NA	1983-12-15	NA	NA	1819.8
Abrostola_triplasia	Rauris: WĂ¶rth â€˘ PG-0025	1959-07-01	1959	958.6	NA	1984-01-01	NA	NA	606.919
Abrostola_triplasia	GroĂźgmain: KĂĽhbach-Tal, Veitlbruch â€˘ PG-0221	1985-07-01	1985	632.422	NA	2003-09-19	NA	NA	1829.15
Abrostola_triplasia	Koppl: Guggenthal, Kohlhub, Alter Bach NE Kohlhub â€˘ PG-0392	2012-07-01	2012	563.714	NA	2015-03-17	NA	NA	4881.17
Abrostola_triplasia	Abtenau Ortsgebiet â€˘ PG-0354	1929-07-01	1929	714.61	NA	1982-02-16	NA	NA	2658.48
Abrostola_triplasia	Koppl (ungenau) â€˘ PG-0691	1962-07-01	1962	749.22	NA	1975-09-30	NA	NA	6594.28
Abrostola_triplasia	Salzburg Stadt (ungenau) â€˘ 410-435 m â€˘ PG-0346	1930-07-01	1930	423.869	NA	2015-03-17	NA	NA	866.906
Abrostola_triplasia	Salzburg Stadt (ungenau) â€˘ 410-435 m â€˘ PG-0346	1924-07-01	1924	423.869	NA	2015-03-17	NA	NA	866.906
Abrostola_triplasia	Salzburg Stadt: Liefering, Salzachseen â€˘ NW (Saalachspitz) â€˘ PG-0510	1997-07-01	1997	409.823	NA	2002-12-03	NA	NA	3312.76
Abrostola_triplasia	Salzburg Stadt (ungenau) â€˘ 410-435 m â€˘ PG-0346	1954-07-01	1954	423.869	NA	2015-03-17	NA	NA	866.906
Abrostola_triplasia	Vigaun: Schlenken â€˘ PG-0259	1956-07-01	1956	1564.83	NA	2007-11-06	NA	NA	4733.4
Abrostola_triplasia	Muhr: Pfeifenberger â€˘ PG-0090	1973-07-01	1973	1194.51	NA	1984-01-01	NA	NA	7016.32
Abrostola_triplasia	Salzburg Stadt: Aigen, Parsch â€˘ PG-0208	1961-07-01	1961	432.161	NA	2015-03-17	NA	NA	2878
Abrostola_triplasia	Salzburg Stadt: Aigen, Parsch â€˘ PG-0208	1960-07-01	1960	432.161	NA	2015-03-17	NA	NA	2878
Abrostola_triplasia	Salzburg Stadt: Aigen â€˘ PG-0355	1947-07-01	1947	433.096	NA	2015-03-17	NA	NA	3422.92
Abrostola_triplasia	Salzburg Stadt: Gnigl â€˘ PG-0376	1958-07-01	1958	437.404	NA	2015-03-17	NA	NA	3284.9
Abrostola_triplasia	Salzburg Stadt: Aigen, Parsch â€˘ PG-0208	1959-07-01	1959	432.161	NA	2015-03-17	NA	NA	2878
Abrostola_triplasia	Salzburg Stadt: Aigen, Parsch â€˘ PG-0208	1957-07-01	1957	432.161	NA	2015-03-17	NA	NA	2878
Abrostola_triplasia	Salzburg Stadt: Aigen, Parsch â€˘ PG-0208	1959-07-01	1959	432.161	NA	2015-03-17	NA	NA	2878
Abrostola_triplasia	Salzburg Stadt: Aigen, Parsch â€˘ PG-0208	1959-07-01	1959	432.161	NA	2015-03-17	NA	NA	2878
Abrostola_triplasia	Golling an der Salzach Ortsgebiet â€˘ PG-0225	1938-07-01	1938	467.92	NA	2002-12-03	NA	NA	1771.24
Abrostola_triplasia	Hallwang: SĂ¶llheim â€˘ PG-0338	1957-07-01	1957	455.046	NA	1980-01-25	NA	NA	5036.4
Abrostola_triplasia	Salzburg Stadt: MĂ¶nchsberg â€˘ PG-0658	1932-07-01	1932	431.537	NA	2015-03-17	NA	NA	878.234
Abrostola_triplasia	Salzburg Stadt: Hallwang, Kasern â€˘ PG-0273	1958-07-01	1958	498.487	NA	2015-03-17	NA	NA	5051.82
Abrostola_triplasia	Salzburg Stadt: Hallwang, Kasern â€˘ PG-0273	1945-07-01	1945	498.487	NA	2015-03-17	NA	NA	5051.82
Abrostola_triplasia	Muhr: Hintermuhr, Jedl â€˘ N â€˘ PG-1207	1991-07-01	1991	1261.33	NA	1984-01-01	NA	NA	5894.9
Abrostola_triplasia	Abtenau Ortsgebiet â€˘ PG-0354	1929-07-01	1929	714.61	NA	1982-02-16	NA	NA	2658.48
Abrostola_triplasia	Plainfeld: Observation-Fundort â€˘ 13,16259/47,83716	2022-07-01	2022	698.721	NA	1975-09-30	NA	NA	6429.45
Abrostola_triplasia	Maria Alm am Steinernen Meer: Observation-Fundort â€˘ 12,93806/47,38091	2021-07-01	2021	1062.08	NA	1983-12-15	NA	NA	5260.13
Abrostola_triplasia	Maria Alm am Steinernem Meer: Natrun â€˘ GE-0172	2016-07-01	2016	1247.34	NA	1983-12-15	NA	NA	4181.47
Abrostola_triplasia	Salzburg Stadt: Aigen, Parsch â€˘ PG-0208	1955-07-01	1955	432.161	NA	2015-03-17	NA	NA	2878
Abrostola_triplasia	Salzburg Stadt: Aigen, Parsch â€˘ PG-0208	1956-07-01	1956	432.161	NA	2015-03-17	NA	NA	2878
Abrostola_triplasia	Salzburg Stadt: Aigen, Parsch â€˘ PG-0208	1955-07-01	1955	432.161	NA	2015-03-17	NA	NA	2878
Abrostola_triplasia	Salzburg Stadt (ungenau) â€˘ 410-435 m â€˘ PG-0346	1936-07-01	1936	423.869	NA	2015-03-17	NA	NA	866.906
Abrostola_triplasia	Salzburg Stadt (ungenau) â€˘ 410-435 m â€˘ PG-0346	1930-07-01	1930	423.869	NA	2015-03-17	NA	NA	866.906
Abrostola_triplasia	Salzburg Stadt: Itzling â€˘ PG-0667	1962-07-01	1962	418.512	NA	2015-03-17	NA	NA	3375.2
Abrostola_triplasia	Salzburg Stadt (ungenau) â€˘ 410-435 m â€˘ PG-0346	1939-07-01	1939	423.869	NA	2015-03-17	NA	NA	866.906
Abrostola_triplasia	Salzburg Stadt: Itzling â€˘ PG-0667	1955-07-01	1955	418.512	NA	2015-03-17	NA	NA	3375.2
Abrostola_triplasia	Salzburg Stadt (ungenau) â€˘ 410-435 m â€˘ PG-0346	1955-07-01	1955	423.869	NA	2015-03-17	NA	NA	866.906
Abrostola_triplasia	Salzburg Stadt: Aigen, Parsch â€˘ PG-0208	1955-07-01	1955	432.161	NA	2015-03-17	NA	NA	2878
Abrostola_triplasia	Salzburg (Stadt): Observation-Fundort â€˘ 13,04827/47,82664	2021-07-01	2021	424.642	NA	2015-03-17	NA	NA	4022.06
Abrostola_triplasia	Rauris: GroĂźglocknerstraĂźe, MittertĂ¶rl â€˘ PG-0003	2005-07-01	2005	2260.57	NA	1984-01-01	NA	NA	68.7506
Abrostola_triplasia	Fusch an der GroĂźglocknerstraĂźe: GroĂźglocknerstraĂźe, "E. P. Tratz Forschungsstation" â€˘ PG-0001	1990-07-01	1990	2262.36	NA	1984-01-01	NA	NA	118.855
Abrostola_triplasia	Rauris: GroĂźglocknerstraĂźe, MittertĂ¶rl â€˘ PG-0003	2012-07-01	2012	2260.57	NA	1984-01-01	NA	NA	68.7506
Abrostola_triplasia	Rauris: GroĂźglocknerstraĂźe, MittertĂ¶rl â€˘ PG-0003	2002-07-01	2002	2260.57	NA	1984-01-01	NA	NA	68.7506
Abrostola_triplasia	Salzburg Stadt: Aigen â€˘ PG-0355	1964-07-01	1964	433.096	NA	2015-03-17	NA	NA	3422.92
Abrostola_triplasia	Salzburg Stadt: Aigen, Parsch â€˘ PG-0208	1962-07-01	1962	432.161	NA	2015-03-17	NA	NA	2878
Abrostola_triplasia	Hallwang: SĂ¶llheim â€˘ PG-0338	1965-07-01	1965	455.046	NA	1980-01-25	NA	NA	5036.4
Abrostola_triplasia	Hallwang: SĂ¶llheim â€˘ PG-0338	1961-07-01	1961	455.046	NA	1980-01-25	NA	NA	5036.4
Abrostola_triplasia	Salzburg Stadt: Aigen, Parsch â€˘ PG-0208	1961-07-01	1961	432.161	NA	2015-03-17	NA	NA	2878
Abrostola_triplasia	Salzburg Stadt: Aigen, Parsch â€˘ PG-0208	1954-07-01	1954	432.161	NA	2015-03-17	NA	NA	2878
Abrostola_triplasia	Salzburg Stadt: Aigen, Parsch â€˘ PG-0208	1962-07-01	1962	432.161	NA	2015-03-17	NA	NA	2878
Abrostola_triplasia	Salzburg Stadt: Aigen, Parsch â€˘ PG-0208	1961-07-01	1961	432.161	NA	2015-03-17	NA	NA	2878
Abrostola_triplasia	Golling an der Salzach: Bluntautal, Jochalm-StraĂźe S Alpwinklalm â€˘ PG-1375	1954-07-01	1954	962.15	NA	1983-12-15	NA	NA	181.442
Abrostola_triplasia	Uttendorf: Stubachtal â€˘ PG-0194	1966-07-01	1966	975.73	NA	1984-01-01	NA	NA	1805.79
Abrostola_triplasia	Saalbach-Hinterglemm: Hinterglemm / hinteres Glemmtal (ungenau) â€˘ PG-0067	1971-07-01	1971	1320.96	NA	2018-12-31	NA	NA	12239.6
Abrostola_triplasia	Golling an der Salzach: Bluntautal, Jochalm-StraĂźe S Alpwinklalm â€˘ PG-1375	1954-07-01	1954	962.15	NA	1983-12-15	NA	NA	181.442
Abrostola_triplasia	Pfarrwerfen Ortsgebiet â€˘ PG-0180	1961-07-01	1961	535.08	NA	1982-02-16	NA	NA	3573.97
Abrostola_triplasia	Sankt Gilgen: Observation-Fundort â€˘ 13,40676/47,73203	2021-07-01	2021	574.96	NA	1973-07-27	NA	NA	2670.16
Abrostola_triplasia	Koppl: Guggenthal, Kohlhub, Alter Bach NE Kohlhub â€˘ PG-0392	2002-07-01	2002	563.714	NA	2015-03-17	NA	NA	4881.17
Abrostola_triplasia	Bad Hofgastein: SchloĂźalm-Gebiet â€˘ PG-0027	1960-07-01	1960	2107.95	NA	1984-01-01	NA	NA	6304.4
Abrostola_triplasia	Fusch an der GroĂźglocknerstraĂźe: GroĂźglocknerstraĂźe, HochmaiĂź â€˘ PG-0002	1997-07-01	1997	1808.56	NA	1984-01-01	NA	NA	343.565
Abrostola_triplasia	Uttendorf: Stubachtal, Tauernmoossee â€˘ PG-0081	1955-07-01	1955	2067.76	NA	1984-01-01	NA	NA	1005.33
Abrostola_triplasia	Uttendorf: Stubachtal, Tauernmoossee â€˘ PG-0081	1955-07-01	1955	2067.76	NA	1984-01-01	NA	NA	1005.33
Abrostola_triplasia	Muhr: Pfeifenberger â€˘ PG-0090	1972-07-01	1972	1194.51	NA	1984-01-01	NA	NA	7016.32
Abrostola_triplasia	Saalbach-Hinterglemm: Hinterglemm / hinteres Glemmtal (ungenau) â€˘ PG-0067	1971-07-01	1971	1320.96	NA	2018-12-31	NA	NA	12239.6
Abrostola_triplasia	Muhr: Pfeifenberger â€˘ PG-0090	1972-07-01	1972	1194.51	NA	1984-01-01	NA	NA	7016.32
Abrostola_triplasia	GroĂźgmain: KĂĽhbach-Tal, Veitlbruch â€˘ PG-0221	1975-07-01	1975	632.422	NA	2003-09-19	NA	NA	1829.15
Abrostola_triplasia	GroĂźgmain: KĂĽhbach-Tal, Veitlbruch â€˘ PG-0221	1974-07-01	1974	632.422	NA	2003-09-19	NA	NA	1829.15
Abrostola_triplasia	Bad Hofgastein: SchloĂźalm-Gebiet â€˘ PG-0027	1958-07-01	1958	2107.95	NA	1984-01-01	NA	NA	6304.4
Abrostola_triplasia	Mauterndorf Ortsgebiet â€˘ PG-0066	1926-07-01	1926	1123.06	NA	2016-02-01	NA	NA	1739.45
Abrostola_triplasia	Kuchl: Unterlangenberg, Wenglippen â€˘ PG-0395	1994-07-01	1994	472.44	NA	2016-02-01	NA	NA	1127.46
Abrostola_triplasia	GroĂźgmain: KĂĽhbach-Tal, Veitlbruch â€˘ PG-0221	1986-07-01	1986	632.422	NA	2003-09-19	NA	NA	1829.15
Abrostola_triplasia	Koppl: Guggenthal, Kohlhub, Alter Bach NE Kohlhub â€˘ PG-0392	2016-07-01	2016	563.714	NA	2015-03-17	NA	NA	4881.17
Abrostola_triplasia	Rauris: GroĂźglocknerstraĂźe, MittertĂ¶rl â€˘ PG-0003	1997-07-01	1997	2260.57	NA	1984-01-01	NA	NA	68.7506
Abrostola_triplasia	Bad Hofgastein: SchloĂźalm-Gebiet â€˘ PG-0027	1959-07-01	1959	2107.95	NA	1984-01-01	NA	NA	6304.4
Acasis_appensata	GroĂźgmain: KĂĽhbach-Tal, Veitlbruch â€˘ PG-0221	1995-07-01	1995	632.422	NA	2003-09-19	NA	NA	1829.15
Acasis_appensata	GrĂ¶dig: Untersberg, Rosittenbach-Tal, Dopplersteig, Obere Rositten â€˘ GE-0040	1940-07-01	1940	1406.46	NA	2018-12-31	NA	NA	3408.5
Acasis_appensata	GroĂźgmain: KĂĽhbach-Tal, Veitlbruch â€˘ PG-0221	2004-07-01	2004	632.422	NA	2003-09-19	NA	NA	1829.15
Acasis_viretata	Elsbethen: Glasenbach â€˘ PG-0204	1953-07-01	1953	446.145	NA	2015-03-17	NA	NA	3738.89
Acasis_viretata	Salzburg Stadt: Aigen, Parsch â€˘ PG-0208	1957-07-01	1957	432.161	NA	2015-03-17	NA	NA	2878
Acasis_viretata	Salzburg - Rainberg: Observation-Fundort â€˘ 13,03568/47,7947	2022-07-01	2022	454.505	NA	2015-03-17	NA	NA	641.43
Acasis_viretata	Salzburg - Rainberg: Observation-Fundort â€˘ 13,03562/47,79472	2022-07-01	2022	452.07	NA	2015-03-17	NA	NA	646.21
Acasis_viretata	Salzburg Stadt (ungenau) â€˘ 410-435 m â€˘ PG-0346	1935-07-01	1935	423.869	NA	2015-03-17	NA	NA	866.906
Acasis_viretata	Salzburg Stadt: Gaisberg, Gipfel â€˘ PG-0202	1957-07-01	1957	1272.08	NA	2015-03-17	NA	NA	5407.59
Acasis_viretata	Salzburg Stadt: Aigen, Parsch â€˘ PG-0208	1957-07-01	1957	432.161	NA	2015-03-17	NA	NA	2878
Acasis_viretata	Salzburg Stadt: Aigen, Parsch â€˘ PG-0208	1956-07-01	1956	432.161	NA	2015-03-17	NA	NA	2878
Acasis_viretata	St. Gilgen: Kienberg, Mondsee-Ufer bei Scharfling (St. Lorenz, OĂ–) â€˘ GE-0025	2010-07-01	2010	481.93	NA	1973-07-27	NA	NA	8928.64
Acasis_viretata	Golling an der Salzach: ObergĂ¤u, Luegwinkl â€˘ PG-1322	2006-07-01	2006	474.54	NA	1983-12-15	NA	NA	2352.07
Acasis_viretata	Salzburg - Rainberg: Observation-Fundort â€˘ 13,03611/47,79472	2022-07-01	2022	461.784	NA	2015-03-17	NA	NA	620.246
Acasis_viretata	St. Gilgen: Kienberg, Mondsee-Ufer bei Scharfling (St. Lorenz, OĂ–) â€˘ GE-0025	2012-07-01	2012	481.93	NA	1973-07-27	NA	NA	8928.64
Acasis_viretata	Salzburg Stadt: Aigen, Parsch â€˘ PG-0208	1960-07-01	1960	432.161	NA	2015-03-17	NA	NA	2878
Acasis_viretata	Salzburg Stadt: Liefering, Salzachseen â€˘ NW (Saalachspitz) â€˘ PG-0510	1963-07-01	1963	409.823	NA	2002-12-03	NA	NA	3312.76
Acasis_viretata	BĂĽrmoos Ortsgebiet â€˘ PG-0745	1995-07-01	1995	437.483	NA	2002-12-03	NA	NA	1130.7
Acasis_viretata	Salzburg Stadt: Leopoldskron-Moos, Moor W Gneis / "Gneiser Moor" â€˘ GE-0005	1972-07-01	1972	435.996	NA	2015-03-17	NA	NA	384.555
Acasis_viretata	Koppl: Winkl, "Spechtenschmiede" â€˘ W â€˘ PG-0909	1974-07-01	1974	742.43	NA	1975-09-30	NA	NA	7098.18
Acasis_viretata	Koppl: Winkl, "Spechtenschmiede" â€˘ W â€˘ PG-0909	1972-07-01	1972	742.43	NA	1975-09-30	NA	NA	7098.18
Acasis_viretata	Koppl: Winkl, "Spechtenschmiede" â€˘ W â€˘ PG-0909	1974-07-01	1974	742.43	NA	1975-09-30	NA	NA	7098.18
Acasis_viretata	Koppl: Winkl, "Spechtenschmiede" â€˘ W â€˘ PG-0909	1978-07-01	1978	742.43	NA	1975-09-30	NA	NA	7098.18
Acasis_viretata	Koppl: Observation-Fundort â€˘ 13,09353/47,81713	2021-07-01	2021	567.331	NA	2015-03-17	NA	NA	4853.45
Acasis_viretata	Koppl: Winkl, "Spechtenschmiede" â€˘ W â€˘ PG-0909	1973-07-01	1973	742.43	NA	1975-09-30	NA	NA	7098.18
Acasis_viretata	Koppl: Winkl, "Spechtenschmiede" â€˘ W â€˘ PG-0909	1973-07-01	1973	742.43	NA	1975-09-30	NA	NA	7098.18
Acasis_viretata	Maishofen: Mitterhofen â€˘ GE-0087	1992-07-01	1992	758.76	NA	1972-12-28	NA	NA	7239.94
Acasis_viretata	Mattsee: Observation-Fundort â€˘ 13,10019/47,97012	2022-07-01	2022	528.195	NA	1972-12-01	NA	NA	490.849
Acasis_viretata	Salzburg Stadt: Hallwang, Sam, "GLT MoorwĂ¤ldchen in Sam" â€˘ PG-0007	1970-07-01	1970	429.789	NA	2015-03-17	NA	NA	4811.07
Acasis_viretata	Salzburg Stadt: Aigen â€˘ PG-0355	1952-07-01	1952	433.096	NA	2015-03-17	NA	NA	3422.92
Acasis_viretata	GrĂ¶dig: St. Leonhard â€˘ PG-1219	2003-07-01	2003	450.309	NA	2015-03-17	NA	NA	3820.25
Acasis_viretata	BĂĽrmoos Ortsgebiet â€˘ PG-0745	1997-07-01	1997	437.483	NA	2002-12-03	NA	NA	1130.7
Acasis_viretata	Bruck an der GroĂźglocknerstraĂźe: Neuwiesen (Brucker Moos, Brucker Berg) â€˘ GE-0088	1992-07-01	1992	760.31	NA	1972-12-28	NA	NA	1450.84
Acasis_viretata	Bruck an der GroĂźglocknerstraĂźe: Neuwiesen (Brucker Moos, Brucker Berg) â€˘ GE-0088	1992-07-01	1992	760.31	NA	1972-12-28	NA	NA	1450.84
Acasis_viretata	Uttendorf Ortsgebiet â€˘ PG-0639	1992-07-01	1992	796.73	NA	2016-02-01	NA	NA	5244.56
Acasis_viretata	Koppl: Winkl, Koppler Moor â€˘ PG-0439	1997-07-01	1997	763.01	NA	1975-09-30	NA	NA	7422.12
Acasis_viretata	Koppl: Observation-Fundort â€˘ 13,09383/47,81735	2022-07-01	2022	567.64	NA	2015-03-17	NA	NA	4886.14
Acasis_viretata	Koppl: Observation-Fundort â€˘ 13,09383/47,81735	2022-07-01	2022	567.64	NA	2015-03-17	NA	NA	4886.14
Acasis_viretata	Koppl: Winkl, "Spechtenschmiede" â€˘ W â€˘ PG-0909	1975-07-01	1975	742.43	NA	1975-09-30	NA	NA	7098.18
Acasis_viretata	Koppl: Observation-Fundort â€˘ 13,0938/47,8174	2022-07-01	2022	563.862	NA	2015-03-17	NA	NA	4887.72
Acasis_viretata	Uttendorf: Stubachtal, Wirtenbach-MĂĽndung â€˘ GE-0001	1952-07-01	1952	806.34	NA	2018-12-31	NA	NA	5362.2
Acasis_viretata	Uttendorf Ortsgebiet â€˘ PG-0639	1951-07-01	1951	796.73	NA	2016-02-01	NA	NA	5244.56
Acasis_viretata	Maria Alm am Steinernem Meer: Natrun â€˘ GE-0172	2013-07-01	2013	1247.34	NA	1983-12-15	NA	NA	4181.47
Acasis_viretata	Maria Alm am Steinernem Meer: Natrun â€˘ GE-0172	2015-07-01	2015	1247.34	NA	1983-12-15	NA	NA	4181.47
Acentria_ephemerella	Koppl: Winkl, Koppler Moor â€˘ PG-0439	1997-07-01	1997	763.01	NA	1975-09-30	NA	NA	7422.12
Acentria_ephemerella	Koppl: Winkl, Koppler Moor â€˘ PG-0439	1997-07-01	1997	763.01	NA	1975-09-30	NA	NA	7422.12
Acentria_ephemerella	Koppl: Winkl, Koppler Moor â€˘ PG-0439	1997-07-01	1997	763.01	NA	1975-09-30	NA	NA	7422.12
Acentria_ephemerella	Hallwang: SĂ¶llheim â€˘ PG-0338	1966-07-01	1966	455.046	NA	1980-01-25	NA	NA	5036.4
Acentria_ephemerella	Hallwang: SĂ¶llheim â€˘ PG-0338	1966-07-01	1966	455.046	NA	1980-01-25	NA	NA	5036.4
Acentria_ephemerella	Hallwang: SĂ¶llheim â€˘ PG-0338	1967-07-01	1967	455.046	NA	1980-01-25	NA	NA	5036.4
Acentria_ephemerella	Hallwang: SĂ¶llheim â€˘ PG-0338	1966-07-01	1966	455.046	NA	1980-01-25	NA	NA	5036.4
Acentria_ephemerella	Bergheim: Siggerwiesen â€˘ GE-0007	1997-07-01	1997	404.164	NA	2002-12-03	NA	NA	904.384
Acentria_ephemerella	Bergheim: Siggerwiesen â€˘ GE-0007	1996-07-01	1996	404.164	NA	2002-12-03	NA	NA	904.384
Acentria_ephemerella	Salzburg Stadt: Nonntal, Thumegger Bezirk â€˘ GE-0012	1998-07-01	1998	424.724	NA	2015-03-17	NA	NA	357.071
Acentria_ephemerella	Salzburg Stadt: Nonntal, Thumegger Bezirk â€˘ GE-0012	1996-07-01	1996	424.724	NA	2015-03-17	NA	NA	357.071
Acentria_ephemerella	Hallwang: SĂ¶llheim â€˘ PG-0338	1966-07-01	1966	455.046	NA	1980-01-25	NA	NA	5036.4
Acentria_ephemerella	Hallwang: SĂ¶llheim â€˘ PG-0338	1966-07-01	1966	455.046	NA	1980-01-25	NA	NA	5036.4
Acentria_ephemerella	Hallwang: SĂ¶llheim â€˘ PG-0338	1966-07-01	1966	455.046	NA	1980-01-25	NA	NA	5036.4
Acentria_ephemerella	Hallwang: SĂ¶llheim â€˘ PG-0338	1966-07-01	1966	455.046	NA	1980-01-25	NA	NA	5036.4
Acentria_ephemerella	Salzburg Stadt: Nonntal, Thumegger Bezirk â€˘ GE-0012	1996-07-01	1996	424.724	NA	2015-03-17	NA	NA	357.071
Acentria_ephemerella	Hallwang: SĂ¶llheim â€˘ PG-0338	1966-07-01	1966	455.046	NA	1980-01-25	NA	NA	5036.4
Acentria_ephemerella	Hallwang: SĂ¶llheim â€˘ PG-0338	1966-07-01	1966	455.046	NA	1980-01-25	NA	NA	5036.4
Acentria_ephemerella	Salzburg Stadt: Leopoldskron-Moos, Leopoldskroner Weiher â€˘ GE-0023	2004-07-01	2004	430.626	NA	2015-03-17	NA	NA	51.6804
Acentria_ephemerella	Hallwang: SĂ¶llheim â€˘ PG-0338	1965-07-01	1965	455.046	NA	1980-01-25	NA	NA	5036.4
Acentria_ephemerella	Salzburg Stadt: Nonntal, Thumegger Bezirk â€˘ GE-0012	1998-07-01	1998	424.724	NA	2015-03-17	NA	NA	357.071
Acherontia_atropos	Wals-Siezenheim: KleĂźheim â€˘ PG-0379	1924-07-01	1924	418.662	NA	2015-03-17	NA	NA	5032.54
Acherontia_atropos	Salzburg Stadt (ungenau) â€˘ 410-435 m â€˘ PG-0346	1956-07-01	1956	423.869	NA	2015-03-17	NA	NA	866.906
Acherontia_atropos	Kuchl: Observation-Fundort â€˘ 13,1464/47,62176	2022-07-01	2022	463.34	NA	2016-02-01	NA	NA	1698.79
Acherontia_atropos	Kuchl: Observation-Fundort â€˘ 13,14656/47,62195	2022-07-01	2022	462.01	NA	2016-02-01	NA	NA	1677.13
Acherontia_atropos	Mauterndorf Ortsgebiet â€˘ PG-0066	1921-07-01	1921	1123.06	NA	2016-02-01	NA	NA	1739.45
Acherontia_atropos	Unternberg: Moosham, "Mooshamer Moor" â€˘ PG-1369	1920-07-01	1920	1027.53	NA	2015-03-17	NA	NA	238.033
Acherontia_atropos	Salzburg Stadt (ungenau) â€˘ 410-435 m â€˘ PG-0346	1957-07-01	1957	423.869	NA	2015-03-17	NA	NA	866.906
Acherontia_atropos	Salzburg Stadt (ungenau) â€˘ 410-435 m â€˘ PG-0346	1913-07-01	1913	423.869	NA	2015-03-17	NA	NA	866.906
Acherontia_atropos	Saalfelden am Steinernen Meer: Observation-Fundort â€˘ 12,85327/47,40726	2019-07-01	2019	756.73	NA	1983-12-15	NA	NA	4729.01
Acherontia_atropos	Krispl: GaiĂźau, Mirchtlbach, Pillgrub â€˘ SW â€˘ PG-3150	2008-07-01	2008	714.64	NA	2007-11-06	NA	NA	6075.9
Acherontia_atropos	Muhr: Pfeifenberger â€˘ PG-0090	2003-07-01	2003	1194.51	NA	1984-01-01	NA	NA	7016.32
Acherontia_atropos	Salzburg - Oberpinzgauer Talboden: Observation-Fundort â€˘ 12,58173/47,28515	2022-07-01	2022	776.02	NA	2016-02-01	NA	NA	4402.38
Acherontia_atropos	Berndorf bei Salzburg Ortsgebiet â€˘ PG-1513	1935-07-01	1935	551.834	NA	1972-12-01	NA	NA	1788.5
Acherontia_atropos	Abtenau Ortsgebiet â€˘ PG-0354	1927-07-01	1927	714.61	NA	1982-02-16	NA	NA	2658.48
Acherontia_atropos	Abtenau Ortsgebiet â€˘ PG-0354	1927-07-01	1927	714.61	NA	1982-02-16	NA	NA	2658.48
Acherontia_atropos	Strobl Ortsgebiet: Kindergarten	2012-07-01	2012	542.96	NA	1973-07-27	NA	NA	359.861
Acherontia_atropos	Salzburg Stadt: MĂ¶nchsberg â€˘ PG-0658	1967-07-01	1967	431.537	NA	2015-03-17	NA	NA	878.234
Acherontia_atropos	MĂĽhlbach am HochkĂ¶nig Ortsgebiet â€˘ PG-0277	1987-07-01	1987	837.71	NA	1983-12-15	NA	NA	3746.93
Acherontia_atropos	Adnet: Spumberg, Unteregg	2016-07-01	2016	653.425	NA	2007-11-06	NA	NA	2075.89
Acherontia_atropos	Bruck an der GroĂźglocknerstraĂźe: Gries, FĂĽrstau â€˘ PG-0844	2003-07-01	2003	749.73	NA	1972-12-28	NA	NA	5655.33
Acherontia_atropos	Wagrain: HubdĂ¶rfl 25	2011-07-01	2011	968.98	NA	1990-04-27	NA	NA	11833.3
Acherontia_atropos	Salzburg Stadt (ungenau) â€˘ 410-435 m â€˘ PG-0346	1960-07-01	1960	423.869	NA	2015-03-17	NA	NA	866.906
Acherontia_atropos	Krispl: GaiĂźau, Mirchtlbach, Pillgrub â€˘ SW â€˘ PG-3150	2005-07-01	2005	714.64	NA	2007-11-06	NA	NA	6075.9
Acherontia_atropos	Salzburg Stadt: Itzling, FasaneriestraĂźe (Lehen) â€˘ PG-1571	1954-07-01	1954	414.641	NA	2015-03-17	NA	NA	3076.88
Acherontia_atropos	NuĂźdorf am Haunsberg Ortsgebiet â€˘ PG-0826	2003-07-01	2003	436.465	NA	2002-12-03	NA	NA	5015.92
Acherontia_atropos	Salzburg Stadt: Morzg, Hellbrunner Allee â€˘ PG-0765	1955-07-01	1955	424.364	NA	2015-03-17	NA	NA	1441.65
Acherontia_atropos	Salzburg Stadt: Itzling â€˘ PG-0667	1953-07-01	1953	418.512	NA	2015-03-17	NA	NA	3375.2
Acherontia_atropos	Salzburg Stadt (ungenau) â€˘ 410-435 m â€˘ PG-0346	1964-07-01	1964	423.869	NA	2015-03-17	NA	NA	866.906
Acherontia_atropos	Salzburg Stadt (ungenau) â€˘ 410-435 m â€˘ PG-0346	1952-07-01	1952	423.869	NA	2015-03-17	NA	NA	866.906
Acherontia_atropos	Salzburg Stadt (ungenau) â€˘ 410-435 m â€˘ PG-0346	1953-07-01	1953	423.869	NA	2015-03-17	NA	NA	866.906
Acherontia_atropos	Salzburg Stadt (ungenau) â€˘ 410-435 m â€˘ PG-0346	1986-07-01	1986	423.869	NA	2015-03-17	NA	NA	866.906
Acherontia_atropos	Salzburg Stadt: Aigen â€˘ PG-0355	1929-07-01	1929	433.096	NA	2015-03-17	NA	NA	3422.92
Acherontia_atropos	Elsbethen Ortsgebiet â€˘ PG-0659	1938-07-01	1938	427.825	NA	2015-03-17	NA	NA	3319.8
Acherontia_atropos	Salzburg Stadt: Aigen â€˘ PG-0355	1946-07-01	1946	433.096	NA	2015-03-17	NA	NA	3422.92
Acherontia_atropos	Salzburg Stadt: Aigen â€˘ PG-0355	1946-07-01	1946	433.096	NA	2015-03-17	NA	NA	3422.92
Acherontia_atropos	Salzburg Stadt: Innere Stadt, Alter Markt â€˘ PG-1688	1951-07-01	1951	422.193	NA	2015-03-17	NA	NA	1098.37
Acherontia_atropos	Salzburg Stadt: Morzg, Hellbrunner Allee â€˘ PG-0765	1982-07-01	1982	424.364	NA	2015-03-17	NA	NA	1441.65
Acherontia_atropos	Salzburg Stadt: Aigen, Parsch â€˘ PG-0208	1956-07-01	1956	432.161	NA	2015-03-17	NA	NA	2878
Acherontia_atropos	Salzburg Stadt: MĂĽlln â€˘ GE-0054	2007-07-01	2007	426.448	NA	2015-03-17	NA	NA	1707.96
Acherontia_atropos	Salzburg Stadt: MĂ¶nchsberg â€˘ PG-0658	1931-07-01	1931	431.537	NA	2015-03-17	NA	NA	878.234
Acherontia_atropos	Salzburg Stadt: MĂ¶nchsberg â€˘ PG-0658	1930-07-01	1930	431.537	NA	2015-03-17	NA	NA	878.234
Acherontia_atropos	Oberalm Ortsgebiet â€˘ PG-0671	2006-07-01	2006	448.322	NA	2002-12-03	NA	NA	5220.41
Acherontia_atropos	Wals-Siezenheim: Gois, Walser Wiesen, Steinerbach (ungenau) â€˘ PG-0339	1953-07-01	1953	444.262	NA	2016-02-01	NA	NA	684.457
Acherontia_atropos	Salzburg Stadt (ungenau) â€˘ 410-435 m â€˘ PG-0346	1952-07-01	1952	423.869	NA	2015-03-17	NA	NA	866.906
Acherontia_atropos	Salzburg Stadt (ungenau) â€˘ 410-435 m â€˘ PG-0346	1959-07-01	1959	423.869	NA	2015-03-17	NA	NA	866.906
Acherontia_atropos	Salzburg Stadt (ungenau) â€˘ 410-435 m â€˘ PG-0346	1975-07-01	1975	423.869	NA	2015-03-17	NA	NA	866.906
Acherontia_atropos	Salzburg Stadt (ungenau) â€˘ 410-435 m â€˘ PG-0346	1959-07-01	1959	423.869	NA	2015-03-17	NA	NA	866.906
Acherontia_atropos	Sankt AndrĂ¤ im Lungau: Observation-Fundort â€˘ 13,80220/47,14634	2021-07-01	2021	1038.84	NA	2016-02-01	NA	NA	5551.75
Acherontia_atropos	Elsbethen: Observation-Fundort â€˘ 13,114/47,7521	2022-07-01	2022	905.703	NA	2015-03-17	NA	NA	5750.95
Acherontia_atropos	Fusch an der GroĂźglocknerstraĂźe: GroĂźglocknerstraĂźe, "E. P. Tratz Forschungsstation" â€˘ PG-0001	2013-07-01	2013	2262.36	NA	1984-01-01	NA	NA	118.855
Acherontia_atropos	GĂ¶ming: Observation-Fundort â€˘ 12,95315/47,96336	2021-07-01	2021	439.099	NA	2002-12-03	NA	NA	2395.68
Acherontia_atropos	Saalfelden am Steinernen Meer: Observation-Fundort â€˘ 12,80715/47,45140	2021-07-01	2021	740.38	NA	1983-12-15	NA	NA	4357.26
Acherontia_atropos	Sankt Gilgen: Observation-Fundort â€˘ 13,40575/47,7336	2022-07-01	2022	551.84	NA	1973-07-27	NA	NA	2815.2
Acherontia_atropos	Muhr: Pfeifenberger â€˘ PG-0090	1983-07-01	1983	1194.51	NA	1984-01-01	NA	NA	7016.32
Acherontia_atropos	Mauterndorf Ortsgebiet â€˘ PG-0066	1922-07-01	1922	1123.06	NA	2016-02-01	NA	NA	1739.45
Acherontia_atropos	Muhr: Pfeifenberger â€˘ PG-0090	1974-07-01	1974	1194.51	NA	1984-01-01	NA	NA	7016.32
Acherontia_atropos	Muhr: Pfeifenberger â€˘ PG-0090	1973-07-01	1973	1194.51	NA	1984-01-01	NA	NA	7016.32
Acherontia_atropos	Uttendorf: Stubachtal, Wirtenbach-MĂĽndung â€˘ GE-0001	1953-07-01	1953	806.34	NA	2018-12-31	NA	NA	5362.2
Acherontia_atropos	Uttendorf: Stubachtal, Wirtenbach-MĂĽndung â€˘ GE-0001	1951-07-01	1951	806.34	NA	2018-12-31	NA	NA	5362.2
Acherontia_atropos	Untertauern (ungenau) â€˘ PG-0097	1929-07-01	1929	1007.24	NA	2016-02-01	NA	NA	1332.04
Acherontia_atropos	Untertauern (ungenau) â€˘ PG-0097	1924-07-01	1924	1007.24	NA	2016-02-01	NA	NA	1332.04
Acherontia_atropos	Rauris: GroĂźglocknerstraĂźe, MittertĂ¶rl â€˘ PG-0003	2002-07-01	2002	2260.57	NA	1984-01-01	NA	NA	68.7506
Acherontia_atropos	Uttendorf: Stubachtal, WeiĂźsee â€˘ PG-0017	1977-07-01	1977	2285.39	NA	1984-01-01	NA	NA	572.11
Acherontia_atropos	Salzburg Stadt (ungenau) â€˘ 410-435 m â€˘ PG-0346	1962-07-01	1962	423.869	NA	2015-03-17	NA	NA	866.906
Acherontia_atropos	Uttendorf: Kitzsteinhorn â€˘ Bergstation NW Berggipfel	2016-07-01	2016	3041.56	NA	1984-01-01	NA	NA	142.862
Acherontia_atropos	Uttendorf: Stubachtal, WeiĂźsee â€˘ PG-0017	1967-07-01	1967	2285.39	NA	1984-01-01	NA	NA	572.11
Acherontia_atropos	Uttendorf: Stubachtal, WeiĂźsee â€˘ PG-0017	1963-07-01	1963	2285.39	NA	1984-01-01	NA	NA	572.11
Acherontia_atropos	Uttendorf: Stubachtal, WeiĂźsee â€˘ PG-0017	1967-07-01	1967	2285.39	NA	1984-01-01	NA	NA	572.11
Acherontia_atropos	GrĂ¶dig: GrĂ¶dig > Glanegg â€˘ PG-0718	1998-07-01	1998	441.71	NA	2015-03-17	NA	NA	1751.03
Acherontia_atropos	Hallein: Rif â€˘ GE-0191	1964-07-01	1964	434.276	NA	2015-03-17	NA	NA	4967.98
Acherontia_atropos	Wals-Siezenheim: Wals, Breitenweg â€˘ SE	2015-07-01	2015	439.004	NA	2003-09-19	NA	NA	2629.2
Acherontia_atropos	Salzburg Stadt: MĂ¶nchsberg â€˘ PG-0658	1967-07-01	1967	431.537	NA	2015-03-17	NA	NA	878.234
Acherontia_atropos	Salzburg Stadt: Nonntal, Brunnhausgasse â€˘ PG-0507	2012-07-01	2012	430.608	NA	2015-03-17	NA	NA	355
Acherontia_atropos	Salzburg (Stadt): Itzling, Kleingartenanlage Autobahnauffahrt Nord	2019-07-01	2019	434.887	NA	2015-03-17	NA	NA	4205.71
Acherontia_atropos	Wals-Siezenheim: Viehhausen, Eichetsiedlung (Salzburg: Himmelreich)	2007-07-01	2007	433.923	NA	1976-10-29	NA	NA	1344.19
Acherontia_atropos	Abtenau Ortsgebiet â€˘ PG-0354	1925-07-01	1925	714.61	NA	1982-02-16	NA	NA	2658.48
Acherontia_atropos	Saalfelden am Steinernen Meer (ungenau) â€˘ PG-1327	1956-07-01	1956	739.38	NA	1983-12-15	NA	NA	3123.43
Acherontia_atropos	Saalfelden am Steinernen Meer: Dorfheim	2006-07-01	2006	746.28	NA	1983-12-15	NA	NA	3185.72
Acherontia_atropos	Taxenbach: Observation-Fundort â€˘ 12,97922/47,29522	2022-07-01	2022	718.42	NA	2005-02-22	NA	NA	8095.99
Acherontia_atropos	StraĂźwalchen Ortsgebiet â€˘ GE-0033	1950-07-01	1950	542.479	NA	1973-09-28	NA	NA	5946.92
Acherontia_atropos	Saalfelden am Steinernen Meer (ungenau) â€˘ PG-1327	1952-07-01	1952	739.38	NA	1983-12-15	NA	NA	3123.43
Acherontia_atropos	Koppl: Unterkoppl â€˘ W, SchlagstraĂźe	2016-07-01	2016	681.423	NA	2015-03-17	NA	NA	7883.84
Acherontia_atropos	MĂĽhlbach am HochkĂ¶nig Ortsgebiet â€˘ PG-0277	1963-07-01	1963	837.71	NA	1983-12-15	NA	NA	3746.93
Acherontia_atropos	Berndorf bei Salzburg Ortsgebiet â€˘ PG-1513	1935-07-01	1935	551.834	NA	1972-12-01	NA	NA	1788.5
Acherontia_atropos	Rauris: WĂ¶rth â€˘ PG-0025	1973-07-01	1973	958.6	NA	1984-01-01	NA	NA	606.919
Acherontia_atropos	Wald im Pinzgau: Observation-Fundort â€˘ 12,22793/47,2471	2022-07-01	2022	884.12	NA	1984-01-01	NA	NA	2050.12
Acherontia_atropos	Seekirchen am Wallersee Ortsgebiet â€˘ PG-0643	1950-07-01	1950	508.587	NA	1973-10-01	NA	NA	1377.44
Acherontia_atropos	Seekirchen am Wallersee Ortsgebiet â€˘ PG-0643	1973-07-01	1973	508.587	NA	1973-10-01	NA	NA	1377.44
Acherontia_atropos	Werfenweng Ortsgebiet â€˘ PG-0342	2003-07-01	2003	926.15	NA	1982-02-16	NA	NA	2909.29
Acherontia_atropos	Hallein: Rif, Blumenweg	2011-07-01	2011	435.597	NA	2015-03-17	NA	NA	4757.61
Acherontia_atropos	Unternberg Ortsgebiet â€˘ PG-0209	1920-07-01	1920	1025.69	NA	2015-03-17	NA	NA	1968.69
Acherontia_atropos	Saalfelden am Stein.Meer: Pernerwinkel	2017-07-01	2017	928.44	NA	1983-12-15	NA	NA	4141.28
Acherontia_atropos	Saalbach-Hinterglemm: Hinterglemm / hinteres Glemmtal (ungenau) â€˘ PG-0067	1969-07-01	1969	1320.96	NA	2018-12-31	NA	NA	12239.6
Acherontia_atropos	Muhr Ortsgebiet â€˘ PG-0580	2015-07-01	2015	1129.38	NA	1984-01-01	NA	NA	7311.58
Acherontia_atropos	Salzburg Stadt: Maxglan â€˘ PG-0749	1929-07-01	1929	428.285	NA	2015-03-17	NA	NA	2199.2
Acherontia_atropos	Salzburg Stadt: Maxglan, HĂ¶glstraĂźe	2007-07-01	2007	433.409	NA	1976-10-29	NA	NA	1545.73
Acherontia_atropos	Salzburg (Stadt): Schallmoos, vogelweiderstr./Breitenfeldstr.	2019-07-01	2019	427.024	NA	2015-03-17	NA	NA	2680.51
Acherontia_atropos	Salzburg Stadt: Siezenheim, Taxham â€˘ PG-0383	1998-07-01	1998	426.958	NA	2015-03-17	NA	NA	3369.06
Acherontia_atropos	Salzburg Stadt (ungenau) â€˘ 410-435 m â€˘ PG-0346	1939-07-01	1939	423.869	NA	2015-03-17	NA	NA	866.906
Acherontia_atropos	Salzburg Stadt (ungenau) â€˘ 410-435 m â€˘ PG-0346	1964-07-01	1964	423.869	NA	2015-03-17	NA	NA	866.906
Acherontia_atropos	Salzburg Stadt: Itzling â€˘ PG-0667	1929-07-01	1929	418.512	NA	2015-03-17	NA	NA	3375.2
Acherontia_atropos	Salzburg Stadt (ungenau) â€˘ 410-435 m â€˘ PG-0346	1953-07-01	1953	423.869	NA	2015-03-17	NA	NA	866.906
Acherontia_atropos	Golling an der Salzach: ObergĂ¤u, Luegwinkl â€˘ PG-1322	2003-07-01	2003	474.54	NA	1983-12-15	NA	NA	2352.07
Acherontia_atropos	Golling an der Salzach Ortsgebiet â€˘ PG-0225	1954-07-01	1954	467.92	NA	2002-12-03	NA	NA	1771.24
Acherontia_atropos	Mattsee Ortsgebiet â€˘ PG-0335	2005-07-01	2005	507.988	NA	1972-12-01	NA	NA	505.162
Acherontia_atropos	Vigaun Ortsgebiet: Neuwirtsweg 316	2013-07-01	2013	474.953	NA	2002-12-03	NA	NA	107.513
Acherontia_atropos	Oberalm Ortsgebiet â€˘ PG-0671	2006-07-01	2006	448.322	NA	2002-12-03	NA	NA	5220.41
Acherontia_atropos	Elsbethen: Schloss Goldenstein (Salzach)	2007-07-01	2007	426.664	NA	2015-03-17	NA	NA	3174.78
Acherontia_atropos	Salzburg Stadt: Hallwang, Kasern â€˘ PG-0273	1945-07-01	1945	498.487	NA	2015-03-17	NA	NA	5051.82
Acherontia_atropos	Salzburg Stadt: Hallwang, Kasern â€˘ PG-0273	1945-07-01	1945	498.487	NA	2015-03-17	NA	NA	5051.82
Achlya_flavicornis	Salzburg Stadt: Liefering, Salzachseen, Badesee â€˘ Salzach-Uferwald â€˘ PG-1511	1957-07-01	1957	408.49	NA	2002-12-03	NA	NA	3913.86
Achlya_flavicornis	Salzburg Stadt: Hallwang, Kasern â€˘ PG-0273	1959-07-01	1959	498.487	NA	2015-03-17	NA	NA	5051.82
Achlya_flavicornis	St. Georgen bei Salzburg: Roding â€˘ PG-0679	1973-07-01	1973	446.205	NA	2002-12-03	NA	NA	1009.66
Achlya_flavicornis	Bergheim: Plainberg â€˘ PG-0337	1982-07-01	1982	501.429	NA	2002-12-03	NA	NA	4519.79
Achlya_flavicornis	Salzburg Stadt: Hallwang, Kasern â€˘ PG-0273	1960-07-01	1960	498.487	NA	2015-03-17	NA	NA	5051.82
Achlya_flavicornis	GrĂ¶dig: GrĂ¶dig > Glanegg â€˘ PG-0718	1990-07-01	1990	441.71	NA	2015-03-17	NA	NA	1751.03
Achlya_flavicornis	GrĂ¶dig: GrĂ¶dig > Glanegg â€˘ PG-0718	1975-07-01	1975	441.71	NA	2015-03-17	NA	NA	1751.03
Achlya_flavicornis	Hallwang: SĂ¶llheim â€˘ PG-0338	1957-07-01	1957	455.046	NA	1980-01-25	NA	NA	5036.4
Achlya_flavicornis	GrĂ¶dig: GrĂ¶dig > Glanegg â€˘ PG-0718	1976-07-01	1976	441.71	NA	2015-03-17	NA	NA	1751.03
Achlya_flavicornis	Bischofshofen: MitterberghĂĽtten â€˘ PG-0578	1961-07-01	1961	674.06	NA	1983-12-15	NA	NA	6061.75
Achlya_flavicornis	Mattsee: Observation-Fundort â€˘ 13,10032/47,97023	2022-07-01	2022	529.291	NA	1972-12-01	NA	NA	477.269
Achlya_flavicornis	Golling an der Salzach: ObergĂ¤u, Luegwinkl â€˘ PG-1322	2006-07-01	2006	474.54	NA	1983-12-15	NA	NA	2352.07
Achlya_flavicornis	Bergheim: Plainberg â€˘ PG-0337	1982-07-01	1982	501.429	NA	2002-12-03	NA	NA	4519.79
Achlya_flavicornis	BĂĽrmoos Ortsgebiet â€˘ PG-0745	1950-07-01	1950	437.483	NA	2002-12-03	NA	NA	1130.7
Achlya_flavicornis	Salzburg Stadt: Leopoldskron-Moos, Moor W Gneis / "Gneiser Moor" â€˘ PG-0676	1970-07-01	1970	432.168	NA	2015-03-17	NA	NA	501.012
Achlya_flavicornis	BĂĽrmoos Ortsgebiet â€˘ PG-0745	1952-07-01	1952	437.483	NA	2002-12-03	NA	NA	1130.7
Achlya_flavicornis	BĂĽrmoos Ortsgebiet â€˘ PG-0745	1952-07-01	1952	437.483	NA	2002-12-03	NA	NA	1130.7
Achlya_flavicornis	Salzburg Stadt: Siezenheim, Taxham â€˘ PG-0383	1966-07-01	1966	426.958	NA	2015-03-17	NA	NA	3369.06
Achlya_flavicornis	Salzburg Stadt: Nonntal, Thumegger Bezirk â€˘ GE-0012	1974-07-01	1974	424.724	NA	2015-03-17	NA	NA	357.071
Achlya_flavicornis	Wals-Siezenheim: Viehhausen â€˘ PG-0340	1982-07-01	1982	436.084	NA	1976-10-29	NA	NA	1934.29
Achlya_flavicornis	Wals-Siezenheim: Viehhausen â€˘ PG-0340	1982-07-01	1982	436.084	NA	1976-10-29	NA	NA	1934.29
Achlya_flavicornis	Wals-Siezenheim: Viehhausen â€˘ PG-0340	1983-07-01	1983	436.084	NA	1976-10-29	NA	NA	1934.29
Achlya_flavicornis	Wals-Siezenheim: Viehhausen â€˘ PG-0340	1982-07-01	1982	436.084	NA	1976-10-29	NA	NA	1934.29
Achlya_flavicornis	Wals-Siezenheim: Viehhausen â€˘ PG-0340	1982-07-01	1982	436.084	NA	1976-10-29	NA	NA	1934.29
Achlya_flavicornis	Wals-Siezenheim: Viehhausen â€˘ PG-0340	1978-07-01	1978	436.084	NA	1976-10-29	NA	NA	1934.29
Achlya_flavicornis	Wals-Siezenheim: Viehhausen â€˘ PG-0340	1982-07-01	1982	436.084	NA	1976-10-29	NA	NA	1934.29
Achlya_flavicornis	Wals-Siezenheim: Viehhausen â€˘ PG-0340	1982-07-01	1982	436.084	NA	1976-10-29	NA	NA	1934.29
Achlya_flavicornis	Uttendorf: Stubachtal, Schneiderau â€˘ PG-0219	1948-07-01	1948	1006.22	NA	1984-01-01	NA	NA	1399.67
Achlya_flavicornis	Uttendorf: Stubachtal, Schneiderau â€˘ PG-0219	1949-07-01	1949	1006.22	NA	1984-01-01	NA	NA	1399.67
Achlya_flavicornis	Thomatal Ortsgebiet â€˘ PG-0179	1975-07-01	1975	1044.42	NA	2015-03-17	NA	NA	4175.81
Achlya_flavicornis	Thomatal Ortsgebiet â€˘ PG-0179	1975-07-01	1975	1044.42	NA	2015-03-17	NA	NA	4175.81
Achlya_flavicornis	Bad Gastein Ortsgebiet â€˘ PG-0985	1959-07-01	1959	989.22	NA	1984-01-01	NA	NA	2334.34
Achlya_flavicornis	Piesendorf: Walchen, Gasteg â€˘ PG-1900	1981-07-01	1981	911.81	NA	2016-02-01	NA	NA	3149.17
Achlya_flavicornis	Bad Gastein Ortsgebiet â€˘ PG-0985	1972-07-01	1972	989.22	NA	1984-01-01	NA	NA	2334.34
Achlya_flavicornis	Bad Gastein Ortsgebiet â€˘ PG-0985	1972-07-01	1972	989.22	NA	1984-01-01	NA	NA	2334.34
Achlya_flavicornis	Saalbach-Hinterglemm: Sonnhof â€˘ N â€˘ PG-0279	1960-07-01	1960	1432.09	NA	2016-02-01	NA	NA	13603.1
Achlya_flavicornis	Saalbach-Hinterglemm: Sonnhof â€˘ N â€˘ PG-0279	1960-07-01	1960	1432.09	NA	2016-02-01	NA	NA	13603.1
Achlya_flavicornis	Oberndorf bei Salzburg: Stadtgebiet â€˘ GE-0166	1963-07-01	1963	401.06	NA	2002-12-03	NA	NA	69.9502
Achlya_flavicornis	Krimml Ortsgebiet â€˘ GE-0152	1960-07-01	1960	1054.09	NA	1984-01-01	NA	NA	891.587
Achlya_flavicornis	Thomatal Ortsgebiet â€˘ PG-0179	1975-07-01	1975	1044.42	NA	2015-03-17	NA	NA	4175.81
Achlya_flavicornis	Saalbach-Hinterglemm: Sonnhof â€˘ N â€˘ PG-0279	1960-07-01	1960	1432.09	NA	2016-02-01	NA	NA	13603.1
Achlya_flavicornis	Saalbach-Hinterglemm: Sonnhof â€˘ N â€˘ PG-0279	1960-07-01	1960	1432.09	NA	2016-02-01	NA	NA	13603.1
Achlya_flavicornis	Bischofshofen Ortsgebiet â€˘ PG-0626	1957-07-01	1957	545.94	NA	1983-12-15	NA	NA	5656.15
Achlya_flavicornis	Bischofshofen Ortsgebiet â€˘ PG-0626	1959-07-01	1959	545.94	NA	1983-12-15	NA	NA	5656.15
Achlya_flavicornis	Eugendorf Ortsgebiet â€˘ PG-0200	1941-07-01	1941	556.879	NA	1973-10-01	NA	NA	3888.41
Achlya_flavicornis	Eugendorf Ortsgebiet â€˘ PG-0200	1941-07-01	1941	556.879	NA	1973-10-01	NA	NA	3888.41
Achlya_flavicornis	Bischofshofen: MitterberghĂĽtten â€˘ PG-0578	1966-07-01	1966	674.06	NA	1983-12-15	NA	NA	6061.75
Achlya_flavicornis	Bischofshofen: MitterberghĂĽtten â€˘ PG-0578	1961-07-01	1961	674.06	NA	1983-12-15	NA	NA	6061.75
Achlya_flavicornis	Bischofshofen Ortsgebiet â€˘ PG-0626	1957-07-01	1957	545.94	NA	1983-12-15	NA	NA	5656.15
Achlya_flavicornis	Bischofshofen: MitterberghĂĽtten â€˘ PG-0578	1961-07-01	1961	674.06	NA	1983-12-15	NA	NA	6061.75
Achlya_flavicornis	Zell am See Ortsgebiet â€˘ PG-0780	1959-07-01	1959	759.13	NA	1972-12-28	NA	NA	1238.34
Achlya_flavicornis	Zell am See Ortsgebiet â€˘ PG-0780	1959-07-01	1959	759.13	NA	1972-12-28	NA	NA	1238.34
Achlya_flavicornis	Piesendorf: Walchen, Gasteg â€˘ PG-1900	1977-07-01	1977	911.81	NA	2016-02-01	NA	NA	3149.17
Achlya_flavicornis	Piesendorf: Walchen â€˘ GE-0013	1981-07-01	1981	861.48	NA	2016-02-01	NA	NA	3261.59
Achlya_flavicornis	Taxenbach Ortsgebiet â€˘ PG-0821	1960-07-01	1960	765.78	NA	2005-02-22	NA	NA	9181.75
Achlya_flavicornis	Koppl: Observation-Fundort â€˘ 13,09369/47,81707	2019-07-01	2019	567.707	NA	2015-03-17	NA	NA	4858.98
Achlya_flavicornis	Zell am See Ortsgebiet â€˘ PG-0780	1959-07-01	1959	759.13	NA	1972-12-28	NA	NA	1238.34
Achlya_flavicornis	Zell am See Ortsgebiet â€˘ PG-0780	1959-07-01	1959	759.13	NA	1972-12-28	NA	NA	1238.34
Achlya_flavicornis	Bischofshofen: MitterberghĂĽtten â€˘ PG-0578	1966-07-01	1966	674.06	NA	1983-12-15	NA	NA	6061.75
Achlya_flavicornis	Mattsee: Observation-Fundort â€˘ 13,10034/47,97024	2021-07-01	2021	529.822	NA	1972-12-01	NA	NA	475.953
Achlya_flavicornis	GroĂźgmain: KĂĽhbach-Tal, Veitlbruch â€˘ PG-0221	1976-07-01	1976	632.422	NA	2003-09-19	NA	NA	1829.15
Achlya_flavicornis	Schwarzach im Pongau Ortsgebiet â€˘ PG-0633	1959-07-01	1959	595.33	NA	1990-04-27	NA	NA	3088.82
Achlya_flavicornis	Koppl: Winkl, "Spechtenschmiede" â€˘ W â€˘ PG-0909	1976-07-01	1976	742.43	NA	1975-09-30	NA	NA	7098.18
Achlya_flavicornis	Koppl: Winkl, "Spechtenschmiede" â€˘ W â€˘ PG-0909	1987-07-01	1987	742.43	NA	1975-09-30	NA	NA	7098.18
Achlya_flavicornis	Zell am See Ortsgebiet â€˘ PG-0780	1958-07-01	1958	759.13	NA	1972-12-28	NA	NA	1238.34
Achlya_flavicornis	Saalfelden am Steinernen Meer: Observation-Fundort â€˘ 12,82543/47,40366	2019-07-01	2019	737.78	NA	1983-12-15	NA	NA	6232.19
Achlya_flavicornis	Puch bei Hallein: Vollererhof, "SchĂ¶nalm" â€˘ PG-1046	1971-07-01	1971	707.623	NA	2015-03-17	NA	NA	6060.09
Achlya_flavicornis	GroĂźgmain: KĂĽhbach-Tal, Veitlbruch â€˘ PG-0221	1976-07-01	1976	632.422	NA	2003-09-19	NA	NA	1829.15
Achlya_flavicornis	Koppl: Winkl, "Spechtenschmiede" â€˘ W â€˘ PG-0909	1985-07-01	1985	742.43	NA	1975-09-30	NA	NA	7098.18
Achlya_flavicornis	Saalfelden am Steinernen Meer (ungenau) â€˘ PG-1327	1959-07-01	1959	739.38	NA	1983-12-15	NA	NA	3123.43
Achlya_flavicornis	BĂĽrmoos Ortsgebiet â€˘ PG-0745	1949-07-01	1949	437.483	NA	2002-12-03	NA	NA	1130.7
Achlya_flavicornis	Wals-Siezenheim: Gois, Mooswiesen, "Goiser Moor" â€˘ PG-0205	1955-07-01	1955	437.362	NA	2016-02-01	NA	NA	1529.79
Achlya_flavicornis	BĂĽrmoos Ortsgebiet â€˘ PG-0745	1952-07-01	1952	437.483	NA	2002-12-03	NA	NA	1130.7
Achlya_flavicornis	BĂĽrmoos Ortsgebiet â€˘ PG-0745	1958-07-01	1958	437.483	NA	2002-12-03	NA	NA	1130.7
Achlya_flavicornis	Salzburg Stadt: Aigen, Parsch â€˘ PG-0208	1956-07-01	1956	432.161	NA	2015-03-17	NA	NA	2878
Achlya_flavicornis	Salzburg Stadt: Leopoldskron-Moos, Moor W Gneis / "Gneiser Moor" â€˘ PG-0676	1993-07-01	1993	432.168	NA	2015-03-17	NA	NA	501.012
Achlya_flavicornis	Salzburg Stadt: Leopoldskron-Moos, Moor W Gneis / "Gneiser Moor" â€˘ PG-0676	1955-07-01	1955	432.168	NA	2015-03-17	NA	NA	501.012
Achlya_flavicornis	Hallwang: SĂ¶llheim â€˘ PG-0338	1966-07-01	1966	455.046	NA	1980-01-25	NA	NA	5036.4
Achlya_flavicornis	Wals-Siezenheim: Viehhausen â€˘ PG-0340	1993-07-01	1993	436.084	NA	1976-10-29	NA	NA	1934.29
Achlya_flavicornis	Salzburg Stadt: Hallwang, Kasern â€˘ PG-0273	1931-07-01	1931	498.487	NA	2015-03-17	NA	NA	5051.82
Achlya_flavicornis	Salzburg Stadt: Hallwang, Kasern â€˘ PG-0273	1939-07-01	1939	498.487	NA	2015-03-17	NA	NA	5051.82
Achlya_flavicornis	Wals-Siezenheim: Viehhausen â€˘ PG-0340	1976-07-01	1976	436.084	NA	1976-10-29	NA	NA	1934.29
Achlya_flavicornis	BĂĽrmoos Ortsgebiet â€˘ PG-0745	1952-07-01	1952	437.483	NA	2002-12-03	NA	NA	1130.7
Achlya_flavicornis	Wals-Siezenheim: Viehhausen â€˘ PG-0340	1982-07-01	1982	436.084	NA	1976-10-29	NA	NA	1934.29
Achlya_flavicornis	Wals-Siezenheim: Viehhausen â€˘ PG-0340	1976-07-01	1976	436.084	NA	1976-10-29	NA	NA	1934.29
Achlya_flavicornis	Thomatal Ortsgebiet â€˘ PG-0179	1975-07-01	1975	1044.42	NA	2015-03-17	NA	NA	4175.81
Achlya_flavicornis	Thomatal Ortsgebiet â€˘ PG-0179	1975-07-01	1975	1044.42	NA	2015-03-17	NA	NA	4175.81
Achlya_flavicornis	Thomatal Ortsgebiet â€˘ PG-0179	1975-07-01	1975	1044.42	NA	2015-03-17	NA	NA	4175.81
Achlya_flavicornis	Thomatal Ortsgebiet â€˘ PG-0179	1975-07-01	1975	1044.42	NA	2015-03-17	NA	NA	4175.81
Achlya_flavicornis	Thomatal Ortsgebiet â€˘ PG-0179	1975-07-01	1975	1044.42	NA	2015-03-17	NA	NA	4175.81
Achlya_flavicornis	Uttendorf: Stubachtal, Schneiderau â€˘ PG-0219	1948-07-01	1948	1006.22	NA	1984-01-01	NA	NA	1399.67
Achlya_flavicornis	Thomatal Ortsgebiet â€˘ PG-0179	1975-07-01	1975	1044.42	NA	2015-03-17	NA	NA	4175.81
Achlya_flavicornis	Thomatal Ortsgebiet â€˘ PG-0179	1975-07-01	1975	1044.42	NA	2015-03-17	NA	NA	4175.81
Achlya_flavicornis	Uttendorf: Stubachtal, Schneiderau, "BĂ¶ndlau" â€˘ GE-0058	1949-07-01	1949	1194.05	NA	1984-01-01	NA	NA	850.975
Achlya_flavicornis	Thomatal Ortsgebiet â€˘ PG-0179	1975-07-01	1975	1044.42	NA	2015-03-17	NA	NA	4175.81
Achlya_flavicornis	Muhr: Pfeifenberger â€˘ PG-0090	2006-07-01	2006	1194.51	NA	1984-01-01	NA	NA	7016.32
Achlya_flavicornis	Mauterndorf Ortsgebiet â€˘ PG-0066	1921-07-01	1921	1123.06	NA	2016-02-01	NA	NA	1739.45
Achlya_flavicornis	Thomatal Ortsgebiet â€˘ PG-0179	1975-07-01	1975	1044.42	NA	2015-03-17	NA	NA	4175.81
Achlya_flavicornis	Thomatal Ortsgebiet â€˘ PG-0179	1975-07-01	1975	1044.42	NA	2015-03-17	NA	NA	4175.81
Achlya_flavicornis	Thomatal Ortsgebiet â€˘ PG-0179	1975-07-01	1975	1044.42	NA	2015-03-17	NA	NA	4175.81
Achlya_flavicornis	Thomatal Ortsgebiet â€˘ PG-0179	1975-07-01	1975	1044.42	NA	2015-03-17	NA	NA	4175.81
Achlya_flavicornis	Leogang Ortsgebiet â€˘ PG-0065	1911-07-01	1911	793.02	NA	1983-12-15	NA	NA	7432.94
Achlya_flavicornis	Piesendorf: Walchen â€˘ GE-0013	1976-07-01	1976	861.48	NA	2016-02-01	NA	NA	3261.59
Achlya_flavicornis	Uttendorf: Stubachtal, Schneiderau, Fellern â€˘ PG-0390	1948-07-01	1948	987.32	NA	1984-01-01	NA	NA	2032.86
Achlya_flavicornis	Piesendorf: Walchen, Gasteg â€˘ PG-1900	1976-07-01	1976	911.81	NA	2016-02-01	NA	NA	3149.17
Achlya_flavicornis	Zell am See Ortsgebiet â€˘ PG-0780	1958-07-01	1958	759.13	NA	1972-12-28	NA	NA	1238.34
Achlya_flavicornis	Zell am See Ortsgebiet â€˘ PG-0780	1958-07-01	1958	759.13	NA	1972-12-28	NA	NA	1238.34
Achlya_flavicornis	Zell am See Ortsgebiet â€˘ PG-0780	1959-07-01	1959	759.13	NA	1972-12-28	NA	NA	1238.34
Achlya_flavicornis	Zell am See Ortsgebiet â€˘ PG-0780	1958-07-01	1958	759.13	NA	1972-12-28	NA	NA	1238.34
Achlya_flavicornis	Uttendorf: Stubachtal, Schneiderau â€˘ PG-0219	1948-07-01	1948	1006.22	NA	1984-01-01	NA	NA	1399.67
Achlya_flavicornis	Uttendorf: Stubachtal, Schneiderau â€˘ PG-0219	1949-07-01	1949	1006.22	NA	1984-01-01	NA	NA	1399.67
Achlya_flavicornis	Uttendorf: Stubachtal, Schneiderau â€˘ PG-0219	1949-07-01	1949	1006.22	NA	1984-01-01	NA	NA	1399.67
Achlya_flavicornis	Uttendorf: Stubachtal, Schneiderau â€˘ PG-0219	1949-07-01	1949	1006.22	NA	1984-01-01	NA	NA	1399.67
Achlya_flavicornis	Uttendorf: Stubachtal, Schneiderau â€˘ PG-0219	1948-07-01	1948	1006.22	NA	1984-01-01	NA	NA	1399.67
Achlya_flavicornis	Uttendorf: Stubachtal, Schneiderau â€˘ PG-0219	1948-07-01	1948	1006.22	NA	1984-01-01	NA	NA	1399.67
Achlya_flavicornis	Uttendorf: Stubachtal, Schneiderau â€˘ PG-0219	1949-07-01	1949	1006.22	NA	1984-01-01	NA	NA	1399.67
Achlya_flavicornis	Uttendorf: Stubachtal, Schneiderau â€˘ PG-0219	1949-07-01	1949	1006.22	NA	1984-01-01	NA	NA	1399.67
Achlya_flavicornis	Saalbach-Hinterglemm: Hinterglemm / hinteres Glemmtal (ungenau) â€˘ PG-0067	1969-07-01	1969	1320.96	NA	2018-12-31	NA	NA	12239.6
Achlya_flavicornis	Maria Alm am Steinernem Meer: Natrun â€˘ GE-0172	2012-07-01	2012	1247.34	NA	1983-12-15	NA	NA	4181.47
Achlya_flavicornis	Thomatal Ortsgebiet â€˘ PG-0179	1975-07-01	1975	1044.42	NA	2015-03-17	NA	NA	4175.81
Achlya_flavicornis	Saalbach-Hinterglemm: Hinterglemm / hinteres Glemmtal (ungenau) â€˘ PG-0067	1973-07-01	1973	1320.96	NA	2018-12-31	NA	NA	12239.6
Achlya_flavicornis	Muhr: Pfeifenberger â€˘ PG-0090	1999-07-01	1999	1194.51	NA	1984-01-01	NA	NA	7016.32
Achlya_flavicornis	Muhr: Pfeifenberger â€˘ PG-0090	1993-07-01	1993	1194.51	NA	1984-01-01	NA	NA	7016.32
Achlya_flavicornis	Koppl: Winkl, "Spechtenschmiede" â€˘ W â€˘ PG-0909	1995-07-01	1995	742.43	NA	1975-09-30	NA	NA	7098.18
Achlya_flavicornis	GroĂźgmain: KĂĽhbach-Tal, Veitlbruch â€˘ PG-0221	1975-07-01	1975	632.422	NA	2003-09-19	NA	NA	1829.15
Achlya_flavicornis	Thomatal Ortsgebiet â€˘ PG-0179	1975-07-01	1975	1044.42	NA	2015-03-17	NA	NA	4175.81
Achlya_flavicornis	Thomatal Ortsgebiet â€˘ PG-0179	1975-07-01	1975	1044.42	NA	2015-03-17	NA	NA	4175.81
Acleris_abietana	Maria Alm am Steinernem Meer: Natrun â€˘ GE-0172	2015-07-01	2015	1247.34	NA	1983-12-15	NA	NA	4181.47
Acleris_abietana	BĂĽrmoos Ortsgebiet â€˘ PG-0745	2001-07-01	2001	437.483	NA	2002-12-03	NA	NA	1130.7
Acleris_abietana	Koppl: Guggenthal, Kohlhub, Alter Bach NE Kohlhub â€˘ PG-0392	2009-07-01	2009	563.714	NA	2015-03-17	NA	NA	4881.17
Acleris_aspersana	Saalfelden am Steinernen Meer Ortsgebiet â€˘ PG-0281	1966-07-01	1966	740	NA	1983-12-15	NA	NA	3104.28
Acleris_aspersana	Saalfelden am Steinernen Meer Ortsgebiet â€˘ PG-0281	1966-07-01	1966	740	NA	1983-12-15	NA	NA	3104.28
Acleris_aspersana	Saalfelden am Steinernen Meer: Observation-Fundort â€˘ 12,82531/47,40312	2021-07-01	2021	742.82	NA	1983-12-15	NA	NA	6285.65
Acleris_aspersana	Saalfelden am Steinernen Meer Ortsgebiet â€˘ PG-0281	1966-07-01	1966	740	NA	1983-12-15	NA	NA	3104.28
Acleris_aspersana	Bergheim: Plainberg â€˘ PG-0337	1969-07-01	1969	501.429	NA	2002-12-03	NA	NA	4519.79
Acleris_aspersana	Bergheim: Plainberg â€˘ PG-0337	1969-07-01	1969	501.429	NA	2002-12-03	NA	NA	4519.79
Acleris_aspersana	Salzburg Stadt: Morzg, Kleingmain, Josefiau â€˘ PG-0378	1908-07-01	1908	424.267	NA	2015-03-17	NA	NA	2402.26
Acleris_aspersana	Sankt Gilgen: ZwĂ¶lferhorn, Sausteigalm â€˘ S â€˘ PG-3228	2016-07-01	2016	1142.13	NA	2016-02-01	NA	NA	5752.71
Acleris_aspersana	Leogang Ortsgebiet â€˘ PG-0065	1966-07-01	1966	793.02	NA	1983-12-15	NA	NA	7432.94
Acleris_aspersana	Maria Alm/Steinernen Meer: Natrun, Wh. Natrun â€˘ SE â€˘ PG-3119	2018-07-01	2018	1096.35	NA	1983-12-15	NA	NA	4243.48
Acleris_aspersana	Saalbach-Hinterglemm: Hinterglemm / hinteres Glemmtal (ungenau) â€˘ PG-0067	1968-07-01	1968	1320.96	NA	2018-12-31	NA	NA	12239.6
Acleris_aspersana	Uttendorf: Stubachtal, Schneiderau â€˘ PG-0219	1948-07-01	1948	1006.22	NA	1984-01-01	NA	NA	1399.67
Acleris_aspersana	GrĂ¶dig: FĂĽrstenbrunn â€˘ PG-0201	1966-07-01	1966	446.056	NA	2018-12-31	NA	NA	288.596
Acleris_aspersana	Salzburg Stadt: Leopoldskron-Moos, Moor W Gneis / "Gneiser Moor" â€˘ GE-0005	1972-07-01	1972	435.996	NA	2015-03-17	NA	NA	384.555
Acleris_aspersana	Salzburg Stadt: Leopoldskron-Moos â€˘ PG-0380	1907-07-01	1907	429.96	NA	1976-10-29	NA	NA	1458.02
Acleris_aspersana	Salzburg Stadt: Hallwang, Kasern â€˘ GE-0016	1969-07-01	1969	437.438	NA	2015-03-17	NA	NA	5119.66
Acleris_aspersana	Salzburg Stadt: Leopoldskron-Moos, Moor W Gneis / "Gneiser Moor" â€˘ GE-0005	1972-07-01	1972	435.996	NA	2015-03-17	NA	NA	384.555
Acleris_aspersana	Salzburg Stadt: Hallwang, Sam, "GLT MoorwĂ¤ldchen in Sam" â€˘ PG-0007	1966-07-01	1966	429.789	NA	2015-03-17	NA	NA	4811.07
Acleris_aspersana	Salzburg Stadt: Hallwang, Sam, "GLT MoorwĂ¤ldchen in Sam" â€˘ PG-0007	1966-07-01	1966	429.789	NA	2015-03-17	NA	NA	4811.07
Acleris_aspersana	Bergheim: Plainberg â€˘ PG-0337	1969-07-01	1969	501.429	NA	2002-12-03	NA	NA	4519.79
Acleris_aspersana	Salzburg Stadt: Hallwang, Sam, "GLT MoorwĂ¤ldchen in Sam" â€˘ PG-0007	1966-07-01	1966	429.789	NA	2015-03-17	NA	NA	4811.07
Acleris_aspersana	Salzburg Stadt: Hallwang, Sam, "GLT MoorwĂ¤ldchen in Sam" â€˘ PG-0007	1966-07-01	1966	429.789	NA	2015-03-17	NA	NA	4811.07
Acleris_aspersana	Salzburg Stadt: Hallwang, Sam, "GLT MoorwĂ¤ldchen in Sam" â€˘ PG-0007	1966-07-01	1966	429.789	NA	2015-03-17	NA	NA	4811.07
Acleris_aspersana	Salzburg Stadt: Hallwang, Sam, "GLT MoorwĂ¤ldchen in Sam" â€˘ PG-0007	1966-07-01	1966	429.789	NA	2015-03-17	NA	NA	4811.07
Acleris_aspersana	Salzburg Stadt: Hallwang, Sam, "GLT MoorwĂ¤ldchen in Sam" â€˘ PG-0007	1966-07-01	1966	429.789	NA	2015-03-17	NA	NA	4811.07
Acleris_bergmanniana	GrĂ¶dig: Untersberg, Rosittenbach-Tal, Dopplersteig, Obere Rositten â€˘ GE-0040	1908-07-01	1908	1406.46	NA	2018-12-31	NA	NA	3408.5
Acleris_bergmanniana	Salzburg Stadt: Hallwang, Kasern â€˘ GE-0016	1968-07-01	1968	437.438	NA	2015-03-17	NA	NA	5119.66
Acleris_bergmanniana	Salzburg Stadt: Gaisberg, Zistelalm â€˘ PG-0288	1966-07-01	1966	1005	NA	2015-03-17	NA	NA	5707.28
Acleris_bergmanniana	Koppl: Nockstein â€˘ PG-0670	1908-07-01	1908	963.135	NA	2015-03-17	NA	NA	6471.72
Acleris_cristana	Salzburg Stadt: Aigen, Parsch â€˘ PG-0208	2016-07-01	2016	432.161	NA	2015-03-17	NA	NA	2878
Acleris_cristana	Koppl: Guggenthal, Kohlhub, Alter Bach NE Kohlhub â€˘ PG-0392	2018-07-01	2018	563.714	NA	2015-03-17	NA	NA	4881.17
Acleris_cristana	Hallwang: SĂ¶llheim â€˘ PG-0338	1966-07-01	1966	455.046	NA	1980-01-25	NA	NA	5036.4
Acleris_emargana	St. Martin am Tennengebirge: LungĂ¶tz, Lammertal, Scharfer Steig â€˘ 980 m â€˘ PG-2460	2010-07-01	2010	971.25	NA	1982-02-16	NA	NA	375.33
Acleris_emargana	GrĂ¶dig Ortsgebiet â€˘ PG-0367	1966-07-01	1966	446.179	NA	2015-03-17	NA	NA	2057.83
Acleris_emargana	Uttendorf: Stubachtal, Schneiderau â€˘ PG-0219	1952-07-01	1952	1006.22	NA	1984-01-01	NA	NA	1399.67
Acleris_emargana	BĂĽrmoos Ortsgebiet â€˘ PG-0745	2005-07-01	2005	437.483	NA	2002-12-03	NA	NA	1130.7
Acleris_emargana	Maria Alm am Steinernem Meer: Natrun â€˘ GE-0172	2015-07-01	2015	1247.34	NA	1983-12-15	NA	NA	4181.47
Acleris_emargana	Maria Alm am Steinernem Meer: Natrun â€˘ GE-0172	2009-07-01	2009	1247.34	NA	1983-12-15	NA	NA	4181.47
Acleris_emargana	Maria Alm am Steinernem Meer: Natrun â€˘ GE-0172	2013-07-01	2013	1247.34	NA	1983-12-15	NA	NA	4181.47
Acleris_emargana	Maria Alm am Steinernem Meer: Natrun â€˘ GE-0172	2016-07-01	2016	1247.34	NA	1983-12-15	NA	NA	4181.47
Acleris_emargana	St. Georgen bei Salzburg: Roding â€˘ PG-0679	1970-07-01	1970	446.205	NA	2002-12-03	NA	NA	1009.66
Acleris_emargana	Salzburg Stadt: Gaisberg, Judenberg â€˘ PG-0934	1964-07-01	1964	728.354	NA	2015-03-17	NA	NA	4387.31
Acleris_emargana	Salzburg Stadt: Morzg, Kleingmain, Josefiau â€˘ PG-0378	1907-07-01	1907	424.267	NA	2015-03-17	NA	NA	2402.26
Acleris_ferrugana	Salzburg Stadt: Leopoldskron-Moos, Moor W Gneis / "Gneiser Moor" â€˘ GE-0005	1972-07-01	1972	435.996	NA	2015-03-17	NA	NA	384.555
Acleris_ferrugana	Salzburg Stadt: Leopoldskron-Moos, Moor W Gneis / "Gneiser Moor" â€˘ GE-0005	1972-07-01	1972	435.996	NA	2015-03-17	NA	NA	384.555
Acleris_ferrugana	Salzburg Stadt: Leopoldskron-Moos, Moor W Gneis / "Gneiser Moor" â€˘ GE-0005	1972-07-01	1972	435.996	NA	2015-03-17	NA	NA	384.555
Acleris_ferrugana	Salzburg Stadt: Leopoldskron-Moos, Moor W Gneis / "Gneiser Moor" â€˘ GE-0005	1972-07-01	1972	435.996	NA	2015-03-17	NA	NA	384.555
Acleris_ferrugana	Koppl: Guggenthal, Kohlhub, Alter Bach NE Kohlhub â€˘ PG-0392	2021-07-01	2021	563.714	NA	2015-03-17	NA	NA	4881.17
Acleris_ferrugana	Bergheim: Plainberg â€˘ PG-0337	1968-07-01	1968	501.429	NA	2002-12-03	NA	NA	4519.79
Acleris_ferrugana	St. Martin am Tennengebirge: LungĂ¶tz, Lammertal, Scharfer Steig â€˘ 980 m â€˘ PG-2460	2011-07-01	2011	971.25	NA	1982-02-16	NA	NA	375.33
Acleris_ferrugana	Koppl: Observation-Fundort â€˘ 13,09382/47,81735	2018-07-01	2018	567.249	NA	2015-03-17	NA	NA	4885.54
Acleris_ferrugana	Salzburg Stadt: Leopoldskron-Moos, Moor W Gneis / "Gneiser Moor" â€˘ GE-0005	1972-07-01	1972	435.996	NA	2015-03-17	NA	NA	384.555
Acleris_ferrugana	Salzburg Stadt: Leopoldskron-Moos, Moor W Gneis / "Gneiser Moor" â€˘ GE-0005	1971-07-01	1971	435.996	NA	2015-03-17	NA	NA	384.555
Acleris_ferrugana	Salzburg Stadt: Leopoldskron-Moos, Moor W Gneis / "Gneiser Moor" â€˘ GE-0005	1971-07-01	1971	435.996	NA	2015-03-17	NA	NA	384.555
Acleris_ferrugana	Salzburg Stadt: Leopoldskron-Moos, Moor W Gneis / "Gneiser Moor" â€˘ GE-0005	1971-07-01	1971	435.996	NA	2015-03-17	NA	NA	384.555
Acleris_ferrugana	Salzburg Stadt: Leopoldskron-Moos, Moor W Gneis / "Gneiser Moor" â€˘ GE-0005	1972-07-01	1972	435.996	NA	2015-03-17	NA	NA	384.555
Acleris_ferrugana	Salzburg Stadt: Leopoldskron-Moos, Moor W Gneis / "Gneiser Moor" â€˘ GE-0005	1972-07-01	1972	435.996	NA	2015-03-17	NA	NA	384.555
Acleris_ferrugana	Salzburg Stadt: Leopoldskron-Moos, Moor W Gneis / "Gneiser Moor" â€˘ GE-0005	1972-07-01	1972	435.996	NA	2015-03-17	NA	NA	384.555
Acleris_ferrugana	Salzburg Stadt: Leopoldskron-Moos, Moor W Gneis / "Gneiser Moor" â€˘ GE-0005	1972-07-01	1972	435.996	NA	2015-03-17	NA	NA	384.555
Acleris_ferrugana	Salzburg Stadt: Hallwang, Sam, "GLT MoorwĂ¤ldchen in Sam" â€˘ PG-0007	1968-07-01	1968	429.789	NA	2015-03-17	NA	NA	4811.07
Acleris_ferrugana	Saalbach-Hinterglemm: Hinterglemm / hinteres Glemmtal (ungenau) â€˘ PG-0067	1968-07-01	1968	1320.96	NA	2018-12-31	NA	NA	12239.6
Acleris_ferrugana	Wals-Siezenheim: Gois, Mooswiesen, "Goiser Moor" â€˘ PG-0205	1955-07-01	1955	437.362	NA	2016-02-01	NA	NA	1529.79
Acleris_ferrugana	BĂĽrmoos Ortsgebiet â€˘ PG-0745	1991-07-01	1991	437.483	NA	2002-12-03	NA	NA	1130.7
Acleris_ferrugana	Salzburg Stadt: Leopoldskron-Moos, Moor W Gneis / "Gneiser Moor" â€˘ GE-0005	1972-07-01	1972	435.996	NA	2015-03-17	NA	NA	384.555
Acleris_ferrugana	Faistenau: Tiefbrunnau, KĂĽhleiten / "KĂĽhleitenalm" â€˘ GE-0018	1975-07-01	1975	909.45	NA	2016-02-01	NA	NA	7570.21
Acleris_ferrugana	Salzburg Stadt: Morzg â€˘ PG-0697	1909-07-01	1909	433.728	NA	2015-03-17	NA	NA	1037.83
Acleris_forsskaleana	Salzburg Stadt: Morzg â€˘ PG-0697	1906-07-01	1906	433.728	NA	2015-03-17	NA	NA	1037.83
Acleris_forsskaleana	Salzburg Stadt: Aigen, Parsch â€˘ PG-0208	1955-07-01	1955	432.161	NA	2015-03-17	NA	NA	2878
Acleris_forsskaleana	Hallwang: SĂ¶llheim â€˘ PG-0338	1969-07-01	1969	455.046	NA	1980-01-25	NA	NA	5036.4
Acleris_forsskaleana	GrĂ¶dig Ortsgebiet â€˘ PG-0367	1908-07-01	1908	446.179	NA	2015-03-17	NA	NA	2057.83
Acleris_forsskaleana	Koppl: Guggenthal, Kohlhub, Alter Bach NE Kohlhub â€˘ PG-0392	2019-07-01	2019	563.714	NA	2015-03-17	NA	NA	4881.17
Acleris_forsskaleana	Koppl: Guggenthal, Kohlhub, Alter Bach NE Kohlhub â€˘ PG-0392	2016-07-01	2016	563.714	NA	2015-03-17	NA	NA	4881.17
Acleris_forsskaleana	Salzburg Stadt: Riedenburg, Rainberg â€˘ PG-0381	1970-07-01	1970	445.517	NA	2015-03-17	NA	NA	711.944
Acleris_forsskaleana	Salzburg Stadt: Aigen, Parsch â€˘ PG-0208	1954-07-01	1954	432.161	NA	2015-03-17	NA	NA	2878
Acleris_forsskaleana	Hallwang: SĂ¶llheim â€˘ PG-0338	1971-07-01	1971	455.046	NA	1980-01-25	NA	NA	5036.4
Acleris_forsskaleana	Hallwang: SĂ¶llheim â€˘ PG-0338	1971-07-01	1971	455.046	NA	1980-01-25	NA	NA	5036.4
Acleris_forsskaleana	Muhr: Pfeifenberger â€˘ PG-0090	2004-07-01	2004	1194.51	NA	1984-01-01	NA	NA	7016.32
Acleris_forsskaleana	Muhr: Pfeifenberger â€˘ PG-0090	2003-07-01	2003	1194.51	NA	1984-01-01	NA	NA	7016.32
Acleris_forsskaleana	Salzburg Stadt: Aigen, Parsch â€˘ PG-0208	1955-07-01	1955	432.161	NA	2015-03-17	NA	NA	2878
Acleris_forsskaleana	Muhr: Pfeifenberger â€˘ PG-0090	2004-07-01	2004	1194.51	NA	1984-01-01	NA	NA	7016.32
Acleris_forsskaleana	Muhr: Pfeifenberger â€˘ PG-0090	2004-07-01	2004	1194.51	NA	1984-01-01	NA	NA	7016.32
Acleris_forsskaleana	Muhr: Pfeifenberger â€˘ PG-0090	2004-07-01	2004	1194.51	NA	1984-01-01	NA	NA	7016.32
Acleris_forsskaleana	Muhr: Pfeifenberger â€˘ PG-0090	2004-07-01	2004	1194.51	NA	1984-01-01	NA	NA	7016.32
Acleris_forsskaleana	Muhr: Pfeifenberger â€˘ PG-0090	2003-07-01	2003	1194.51	NA	1984-01-01	NA	NA	7016.32
Acleris_forsskaleana	Hallwang: SĂ¶llheim â€˘ PG-0338	1967-07-01	1967	455.046	NA	1980-01-25	NA	NA	5036.4
Acleris_forsskaleana	Salzburg Stadt: Riedenburg, Rainberg â€˘ PG-0381	1970-07-01	1970	445.517	NA	2015-03-17	NA	NA	711.944
Acleris_forsskaleana	Salzburg Stadt: Gnigl, KĂĽhberg â€˘ PG-0384	1908-07-01	1908	673.413	NA	2015-03-17	NA	NA	3891.71
Acleris_forsskaleana	Hallwang: SĂ¶llheim â€˘ PG-0338	1964-07-01	1964	455.046	NA	1980-01-25	NA	NA	5036.4
Acleris_forsskaleana	Salzburg Stadt: Riedenburg, Rainberg â€˘ PG-0381	1970-07-01	1970	445.517	NA	2015-03-17	NA	NA	711.944
Acleris_forsskaleana	Salzburg Stadt: Riedenburg, Rainberg â€˘ PG-0381	1970-07-01	1970	445.517	NA	2015-03-17	NA	NA	711.944
Acleris_forsskaleana	Salzburg Stadt: Riedenburg, Rainberg â€˘ PG-0381	1970-07-01	1970	445.517	NA	2015-03-17	NA	NA	711.944
Acleris_forsskaleana	Salzburg Stadt: Riedenburg, Rainberg â€˘ PG-0381	1970-07-01	1970	445.517	NA	2015-03-17	NA	NA	711.944
Acleris_forsskaleana	Muhr: Pfeifenberger â€˘ PG-0090	1972-07-01	1972	1194.51	NA	1984-01-01	NA	NA	7016.32
Acleris_forsskaleana	Muhr: Pfeifenberger â€˘ PG-0090	1972-07-01	1972	1194.51	NA	1984-01-01	NA	NA	7016.32
Acleris_forsskaleana	Muhr: Pfeifenberger â€˘ PG-0090	1972-07-01	1972	1194.51	NA	1984-01-01	NA	NA	7016.32
Acleris_forsskaleana	Wald im Pinzgau: Observation-Fundort â€˘ 12,21895/47,24737	2020-07-01	2020	873.17	NA	1984-01-01	NA	NA	2032.44
Acleris_forsskaleana	Koppl: Winkl, "Spechtenschmiede" â€˘ W â€˘ PG-0909	1973-07-01	1973	742.43	NA	1975-09-30	NA	NA	7098.18
Acleris_forsskaleana	Wald im Pinzgau: Observation-Fundort â€˘ 12,21891/47,24731	2020-07-01	2020	872.68	NA	1984-01-01	NA	NA	2025.94
Acleris_hastiana	Uttendorf: Stubachtal, Schneiderau â€˘ PG-0219	1948-07-01	1948	1006.22	NA	1984-01-01	NA	NA	1399.67
Acleris_hastiana	Uttendorf: Stubachtal, Schrabach-Tal, Schrabach-BrĂĽcke der Stubachtal-StraĂźe â€˘ PG-1213	1949-07-01	1949	1161.95	NA	1984-01-01	NA	NA	981.877
Acleris_hastiana	BĂĽrmoos Ortsgebiet â€˘ PG-0745	1998-07-01	1998	437.483	NA	2002-12-03	NA	NA	1130.7
Acleris_hastiana	BĂĽrmoos Ortsgebiet â€˘ PG-0745	2009-07-01	2009	437.483	NA	2002-12-03	NA	NA	1130.7
Acleris_hastiana	Salzburg - Saalachspitz: Observation-Fundort â€˘ 13,00582/47,84596	2022-07-01	2022	411.556	NA	2002-12-03	NA	NA	2772.8
Acleris_hastiana	Zell am See Ortsgebiet â€˘ PG-0780	1949-07-01	1949	759.13	NA	1972-12-28	NA	NA	1238.34
Acleris_hastiana	Salzburg Stadt: Aigen, Parsch â€˘ PG-0208	1966-07-01	1966	432.161	NA	2015-03-17	NA	NA	2878
Acleris_hastiana	Maria Alm am Steinernem Meer: Natrun â€˘ GE-0172	2015-07-01	2015	1247.34	NA	1983-12-15	NA	NA	4181.47
Acleris_hastiana	Muhr: Pfeifenberger â€˘ PG-0090	1973-07-01	1973	1194.51	NA	1984-01-01	NA	NA	7016.32
Acleris_hastiana	Maria Alm am Steinernem Meer: Natrun â€˘ GE-0172	2015-07-01	2015	1247.34	NA	1983-12-15	NA	NA	4181.47
Acleris_hastiana	BĂĽrmoos Ortsgebiet â€˘ PG-0745	2016-07-01	2016	437.483	NA	2002-12-03	NA	NA	1130.7
Acleris_hastiana	BĂĽrmoos Ortsgebiet â€˘ PG-0745	2008-07-01	2008	437.483	NA	2002-12-03	NA	NA	1130.7
Acleris_holmiana	Salzburg Stadt: Lehen â€˘ PG-0762	1908-07-01	1908	415.042	NA	2015-03-17	NA	NA	3341.91
Acleris_holmiana	Salzburg Stadt: MĂ¶nchsberg â€˘ PG-0658	1907-07-01	1907	431.537	NA	2015-03-17	NA	NA	878.234
Acleris_hyemana	Koppl: Winkl, "Spechtenschmiede" â€˘ W â€˘ PG-0909	1972-07-01	1972	742.43	NA	1975-09-30	NA	NA	7098.18
Acleris_kochiella	Muhr: Pfeifenberger â€˘ PG-0090	1975-07-01	1975	1194.51	NA	1984-01-01	NA	NA	7016.32
Acleris_kochiella	Koppl: Observation-Fundort â€˘ 13,09383/47,81735	2022-07-01	2022	567.64	NA	2015-03-17	NA	NA	4886.14
Acleris_laterana	Salzburg Stadt: Hallwang, Kasern â€˘ GE-0016	1966-07-01	1966	437.438	NA	2015-03-17	NA	NA	5119.66
Acleris_laterana	Salzburg Stadt: Morzg, Kleingmain, Josefiau â€˘ PG-0378	1907-07-01	1907	424.267	NA	2015-03-17	NA	NA	2402.26
Acleris_laterana	Pfarrwerfen Ortsgebiet â€˘ PG-0180	1963-07-01	1963	535.08	NA	1982-02-16	NA	NA	3573.97
Acleris_laterana	Saalfelden am Steinernen Meer Ortsgebiet â€˘ PG-0281	1966-07-01	1966	740	NA	1983-12-15	NA	NA	3104.28
Acleris_laterana	Pfarrwerfen Ortsgebiet â€˘ PG-0180	1963-07-01	1963	535.08	NA	1982-02-16	NA	NA	3573.97
Acleris_laterana	Salzburg Stadt: Hallwang, Sam, "GLT MoorwĂ¤ldchen in Sam" â€˘ PG-0007	1966-07-01	1966	429.789	NA	2015-03-17	NA	NA	4811.07
Acleris_laterana	Salzburg Stadt: Hallwang, Sam, "GLT MoorwĂ¤ldchen in Sam" â€˘ PG-0007	1966-07-01	1966	429.789	NA	2015-03-17	NA	NA	4811.07
Acleris_laterana	Golling an der Salzach: ObergĂ¤u, Luegwinkl â€˘ PG-1322	2005-07-01	2005	474.54	NA	1983-12-15	NA	NA	2352.07
Acleris_laterana	Saalfelden am Steinernen Meer: Observation-Fundort â€˘ 12,82463/47,40198	2019-07-01	2019	766.99	NA	1983-12-15	NA	NA	6415.02
Acleris_laterana	Saalfelden am Steinernen Meer: Observation-Fundort â€˘ 12,82537/47,40316	2021-07-01	2021	742.09	NA	1983-12-15	NA	NA	6279.32
Acleris_laterana	Maria Alm am Steinernem Meer: Natrun â€˘ GE-0172	2014-07-01	2014	1247.34	NA	1983-12-15	NA	NA	4181.47
Acleris_laterana	Saalfelden am Steinernen Meer Ortsgebiet â€˘ PG-0281	1966-07-01	1966	740	NA	1983-12-15	NA	NA	3104.28
Acleris_laterana	Saalfelden am Steinernen Meer Ortsgebiet â€˘ PG-0281	1966-07-01	1966	740	NA	1983-12-15	NA	NA	3104.28
Acleris_laterana	Saalfelden am Steinernen Meer: Observation-Fundort â€˘ 12,82542/47,40363	2021-07-01	2021	738.05	NA	1983-12-15	NA	NA	6235.36
Acleris_laterana	Saalfelden am Steinernen Meer Ortsgebiet â€˘ PG-0281	1966-07-01	1966	740	NA	1983-12-15	NA	NA	3104.28
Acleris_laterana	Leogang Ortsgebiet â€˘ PG-0065	1961-07-01	1961	793.02	NA	1983-12-15	NA	NA	7432.94
Acleris_laterana	Koppl: Observation-Fundort â€˘ 13,09383/47,81735	2020-07-01	2020	567.64	NA	2015-03-17	NA	NA	4886.14
Acleris_laterana	Maria Alm am Steinernem Meer: Natrun â€˘ GE-0172	2015-07-01	2015	1247.34	NA	1983-12-15	NA	NA	4181.47
Acleris_laterana	Maria Alm am Steinernem Meer: Natrun â€˘ GE-0172	2011-07-01	2011	1247.34	NA	1983-12-15	NA	NA	4181.47
Acleris_laterana	Koppl: Guggenthal, Kohlhub, Alter Bach NE Kohlhub â€˘ PG-0392	2010-07-01	2010	563.714	NA	2015-03-17	NA	NA	4881.17
Acleris_literana	Maria Alm am Steinernem Meer: Natrun â€˘ GE-0172	2015-07-01	2015	1247.34	NA	1983-12-15	NA	NA	4181.47
Acleris_logiana	Almbach-Tal / "Wiestal" (ungenau) â€˘ PG-0064	1968-07-01	1968	615.32	NA	2007-11-06	NA	NA	9150.72
Acleris_logiana	Salzburg Stadt: Hallwang, Kasern â€˘ PG-0273	1968-07-01	1968	498.487	NA	2015-03-17	NA	NA	5051.82
Acleris_logiana	Bad Gastein Ortsgebiet â€˘ PG-0985	1962-07-01	1962	989.22	NA	1984-01-01	NA	NA	2334.34
Acleris_logiana	Salzburg Stadt: Hallwang, Kasern â€˘ GE-0016	1968-07-01	1968	437.438	NA	2015-03-17	NA	NA	5119.66
Acleris_lorquiniana	BĂĽrmoos Ortsgebiet â€˘ PG-0745	2003-07-01	2003	437.483	NA	2002-12-03	NA	NA	1130.7
Acleris_notana	Salzburg Stadt: Morzg â€˘ PG-0697	1909-07-01	1909	433.728	NA	2015-03-17	NA	NA	1037.83
Acleris_notana	Salzburg Stadt: Leopoldskron-Moos, Moor W Gneis / "Gneiser Moor" â€˘ GE-0005	1971-07-01	1971	435.996	NA	2015-03-17	NA	NA	384.555
Acleris_notana	GrĂ¶dig Ortsgebiet â€˘ PG-0367	2003-07-01	2003	446.179	NA	2015-03-17	NA	NA	2057.83
Acleris_rhombana	Maria Alm am Steinernem Meer: Natrun â€˘ GE-0172	2015-07-01	2015	1247.34	NA	1983-12-15	NA	NA	4181.47
Acleris_rhombana	Salzburg Stadt: MĂ¶nchsberg â€˘ PG-0658	1907-07-01	1907	431.537	NA	2015-03-17	NA	NA	878.234
Acleris_rhombana	Maria Alm am Steinernem Meer: Natrun â€˘ GE-0172	2015-07-01	2015	1247.34	NA	1983-12-15	NA	NA	4181.47
Acleris_rhombana	Salzburg Stadt: Morzg â€˘ PG-0697	1906-07-01	1906	433.728	NA	2015-03-17	NA	NA	1037.83
Acleris_schalleriana	Hallwang: SĂ¶llheim â€˘ PG-0338	1967-07-01	1967	455.046	NA	1980-01-25	NA	NA	5036.4
Acleris_schalleriana	Salzburg Stadt: Aigen, Parsch â€˘ PG-0208	1956-07-01	1956	432.161	NA	2015-03-17	NA	NA	2878
Acleris_schalleriana	Salzburg Stadt: Aigen, Parsch â€˘ PG-0208	1966-07-01	1966	432.161	NA	2015-03-17	NA	NA	2878
Acleris_schalleriana	Zell am See: SchmittenhĂ¶he â€˘ PG-0069	1952-07-01	1952	1962.8	NA	1972-12-28	NA	NA	5068.11
Acleris_schalleriana	Koppl: Winkl, "Spechtenschmiede" â€˘ W â€˘ PG-0909	1974-07-01	1974	742.43	NA	1975-09-30	NA	NA	7098.18
Acleris_schalleriana	Salzburg Stadt: Aigen, Parsch â€˘ PG-0208	1966-07-01	1966	432.161	NA	2015-03-17	NA	NA	2878
Acleris_sparsana	GrĂ¶dig: Glanegg, Rosittenbach-Tal â€˘ GE-0044	1907-07-01	1907	662.474	NA	2018-12-31	NA	NA	1835.47
Acleris_sparsana	Pfarrwerfen Ortsgebiet â€˘ PG-0180	1960-07-01	1960	535.08	NA	1982-02-16	NA	NA	3573.97
Acleris_sparsana	Salzburg-Stadt: Observation-Fundort â€˘ 13,02736/47,79548	2022-07-01	2022	427.695	NA	2015-03-17	NA	NA	1208.41
Acleris_sparsana	Hallwang: SĂ¶llheim â€˘ PG-0338	1967-07-01	1967	455.046	NA	1980-01-25	NA	NA	5036.4
Acleris_sparsana	Salzburg Stadt: Aigen â€˘ PG-0355	1907-07-01	1907	433.096	NA	2015-03-17	NA	NA	3422.92
Acleris_sparsana	Rauris: GroĂźglocknerstraĂźe, MittertĂ¶rl â€˘ PG-0003	2003-07-01	2003	2260.57	NA	1984-01-01	NA	NA	68.7506
Acleris_sparsana	Rauris: GroĂźglocknerstraĂźe, MittertĂ¶rl â€˘ PG-0003	2003-07-01	2003	2260.57	NA	1984-01-01	NA	NA	68.7506
Acleris_sparsana	Salzburg Stadt: MĂ¶nchsberg â€˘ PG-0658	1908-07-01	1908	431.537	NA	2015-03-17	NA	NA	878.234
Acleris_sparsana	Rauris: GroĂźglocknerstraĂźe, MittertĂ¶rl â€˘ PG-0003	2003-07-01	2003	2260.57	NA	1984-01-01	NA	NA	68.7506
Acleris_sparsana	Fusch an der GroĂźglocknerstraĂźe: GroĂźglocknerstraĂźe, "E. P. Tratz Forschungsstation" â€˘ PG-0001	2003-07-01	2003	2262.36	NA	1984-01-01	NA	NA	118.855
Acleris_sparsana	GrĂ¶dig: Glanegg, Rosittenbach-Tal, Untere Rositten	1907-07-01	1907	816.333	NA	2018-12-31	NA	NA	2624.2
Acleris_sparsana	Rauris: GroĂźglocknerstraĂźe, MittertĂ¶rl â€˘ PG-0003	2003-07-01	2003	2260.57	NA	1984-01-01	NA	NA	68.7506
Acleris_sparsana	Rauris: GroĂźglocknerstraĂźe, MittertĂ¶rl â€˘ PG-0003	2003-07-01	2003	2260.57	NA	1984-01-01	NA	NA	68.7506
Acleris_sparsana	Bad Hofgastein: SchloĂźalm-Gebiet â€˘ PG-0027	1958-07-01	1958	2107.95	NA	1984-01-01	NA	NA	6304.4
Acleris_sparsana	Dienten am HochkĂ¶nig: ErichhĂĽtte â€˘ PG-0131	2011-07-01	2011	1527.03	NA	1983-12-15	NA	NA	11.9455
Acleris_sparsana	Salzburg Stadt: Aigen, Parsch â€˘ PG-0208	2016-07-01	2016	432.161	NA	2015-03-17	NA	NA	2878
Acleris_sparsana	Salzburg Stadt: Aigen, Parsch â€˘ PG-0208	2016-07-01	2016	432.161	NA	2015-03-17	NA	NA	2878
Acleris_sparsana	Hallwang: SĂ¶llheim â€˘ PG-0338	1969-07-01	1969	455.046	NA	1980-01-25	NA	NA	5036.4
Acleris_sparsana	Salzburg Stadt: Aigen, Parsch â€˘ PG-0208	2013-07-01	2013	432.161	NA	2015-03-17	NA	NA	2878
Acleris_sparsana	Salzburg Stadt: Leopoldskron-Moos, Leopoldskroner Weiher â€˘ GE-0023	1982-07-01	1982	430.626	NA	2015-03-17	NA	NA	51.6804
Acleris_sparsana	Golling an der Salzach: ObergĂ¤u, Luegwinkl â€˘ PG-1322	2005-07-01	2005	474.54	NA	1983-12-15	NA	NA	2352.07
Acleris_sparsana	Saalbach-Hinterglemm: Hinterglemm / hinteres Glemmtal (ungenau) â€˘ PG-0067	1968-07-01	1968	1320.96	NA	2018-12-31	NA	NA	12239.6
Acleris_sparsana	Saalbach-Hinterglemm: Hinterglemm / hinteres Glemmtal (ungenau) â€˘ PG-0067	1968-07-01	1968	1320.96	NA	2018-12-31	NA	NA	12239.6
Acleris_sparsana	Muhr: Pfeifenberger â€˘ PG-0090	1974-07-01	1974	1194.51	NA	1984-01-01	NA	NA	7016.32
Acleris_sparsana	Saalbach-Hinterglemm: Hinterglemm / hinteres Glemmtal (ungenau) â€˘ PG-0067	1968-07-01	1968	1320.96	NA	2018-12-31	NA	NA	12239.6
Acleris_sparsana	Saalfelden am Stein.Meer Ortsgebiet: Neubaugasse	2016-07-01	2016	736.75	NA	1983-12-15	NA	NA	3245.07
Acleris_sparsana	Koppl: Winkl, "Spechtenschmiede" â€˘ W â€˘ PG-0909	2003-07-01	2003	742.43	NA	1975-09-30	NA	NA	7098.18
Acleris_sparsana	St. Martin am Tennengebirge: LungĂ¶tz, Lammertal, Scharfer Steig â€˘ 980 m â€˘ PG-2460	2010-07-01	2010	971.25	NA	1982-02-16	NA	NA	375.33
Acleris_sparsana	Saalfelden am Steinernen Meer Ortsgebiet â€˘ PG-0281	2016-07-01	2016	740	NA	1983-12-15	NA	NA	3104.28
Acleris_sparsana	Koppl: Observation-Fundort â€˘ 13,09370/47,81705	2021-07-01	2021	567.938	NA	2015-03-17	NA	NA	4858.23
Acleris_sparsana	Golling an der Salzach: ObergĂ¤u, Luegwinkl â€˘ PG-1322	2005-07-01	2005	474.54	NA	1983-12-15	NA	NA	2352.07
Acleris_sparsana	Golling an der Salzach: ObergĂ¤u, Luegwinkl â€˘ PG-1322	2005-07-01	2005	474.54	NA	1983-12-15	NA	NA	2352.07
Acleris_sparsana	Elixhausen Ortsgebiet â€˘ PG-0716	1908-07-01	1908	536.288	NA	1980-01-25	NA	NA	1749.08
Acleris_sparsana	Salzburg - Plainberg: Observation-Fundort â€˘ 13,05321/47,83754	2021-07-01	2021	492.878	NA	1980-01-25	NA	NA	5081.2
Acleris_sparsana	Hallwang: SĂ¶llheim â€˘ PG-0338	1966-07-01	1966	455.046	NA	1980-01-25	NA	NA	5036.4
Acleris_sparsana	BĂĽrmoos Ortsgebiet â€˘ PG-0745	2014-07-01	2014	437.483	NA	2002-12-03	NA	NA	1130.7
Acleris_sparsana	St. Georgen bei Salzburg: Roding â€˘ PG-0679	1979-07-01	1979	446.205	NA	2002-12-03	NA	NA	1009.66
Acleris_sparsana	Hallwang: SĂ¶llheim â€˘ PG-0338	1965-07-01	1965	455.046	NA	1980-01-25	NA	NA	5036.4
Acleris_sparsana	Salzburg Stadt: Gaisberg, Judenberg â€˘ PG-0934	1970-07-01	1970	728.354	NA	2015-03-17	NA	NA	4387.31
Acleris_sparsana	Salzburg Stadt: Gaisberg, Judenberg â€˘ PG-0934	1974-07-01	1974	728.354	NA	2015-03-17	NA	NA	4387.31
Acleris_sparsana	Maria Alm am Steinernem Meer: Natrun â€˘ GE-0172	2016-07-01	2016	1247.34	NA	1983-12-15	NA	NA	4181.47
Acleris_sparsana	Salzburg Stadt: Gaisberg, Judenberg â€˘ PG-0934	1974-07-01	1974	728.354	NA	2015-03-17	NA	NA	4387.31
Acleris_sparsana	Koppl: Observation-Fundort â€˘ 13,09358/47,81717	2021-07-01	2021	567.571	NA	2015-03-17	NA	NA	4859.12
Acleris_sparsana	Salzburg Stadt: Gaisberg, Judenberg â€˘ PG-0934	1970-07-01	1970	728.354	NA	2015-03-17	NA	NA	4387.31
Acleris_sparsana	Salzburg Stadt: Gaisberg, Judenberg â€˘ PG-0934	1964-07-01	1964	728.354	NA	2015-03-17	NA	NA	4387.31
Acleris_sparsana	Koppl: Observation-Fundort â€˘ 13,09383/47,81735	2021-07-01	2021	567.64	NA	2015-03-17	NA	NA	4886.14
Acleris_sparsana	Koppl: Observation-Fundort â€˘ 13,09382/47,81734	2022-07-01	2022	567.249	NA	2015-03-17	NA	NA	4884.87
Acleris_sparsana	MĂĽhlbach am HochkĂ¶nig: Trockenbach-Tal, Stegmoosalm â€˘ PG-0175	2004-07-01	2004	1445.32	NA	1983-12-15	NA	NA	419.201
Acleris_sparsana	Bergheim Ortsgebiet â€˘ PG-0360	1943-07-01	1943	427.029	NA	2002-12-03	NA	NA	3736.31
Acleris_sparsana	Salzburg Stadt: Itzling â€˘ PG-0667	1973-07-01	1973	418.512	NA	2015-03-17	NA	NA	3375.2
Acleris_sparsana	Koppl: Guggenthal, Kohlhub, Alter Bach NE Kohlhub â€˘ PG-0392	2009-07-01	2009	563.714	NA	2015-03-17	NA	NA	4881.17
Acleris_sparsana	Salzburg Stadt: Nonntal, Thumegger Bezirk â€˘ GE-0012	2014-07-01	2014	424.724	NA	2015-03-17	NA	NA	357.071
Acleris_umbrana	Saalfelden am Steinernen Meer: Observation-Fundort â€˘ 12,82531/47,40312	2021-07-01	2021	742.82	NA	1983-12-15	NA	NA	6285.65
Acleris_umbrana	Muhr: Pfeifenberger â€˘ PG-0090	2004-07-01	2004	1194.51	NA	1984-01-01	NA	NA	7016.32
Acleris_umbrana	Muhr: Pfeifenberger â€˘ PG-0090	2014-07-01	2014	1194.51	NA	1984-01-01	NA	NA	7016.32
Acleris_variegana	Salzburg (Stadt): Observation-Fundort â€˘ 13,02729/47,79590	2021-07-01	2021	428.186	NA	2015-03-17	NA	NA	1234.3
Acleris_variegana	Salzburg Stadt (ungenau) â€˘ 410-435 m â€˘ PG-0346	1961-07-01	1961	423.869	NA	2015-03-17	NA	NA	866.906
Acleris_variegana	BĂĽrmoos Ortsgebiet â€˘ PG-0745	2004-07-01	2004	437.483	NA	2002-12-03	NA	NA	1130.7
Acleris_variegana	Salzburg Stadt: Hallwang, Sam, "GLT MoorwĂ¤ldchen in Sam" â€˘ PG-0007	1961-07-01	1961	429.789	NA	2015-03-17	NA	NA	4811.07
Acleris_variegana	GroĂźarl: Observation-Fundort â€˘ 13,19304/47,24787	2022-07-01	2022	928.71	NA	1990-04-27	NA	NA	3140.34
Acleris_variegana	Maria Alm am Steinernem Meer: Natrun â€˘ GE-0172	2013-07-01	2013	1247.34	NA	1983-12-15	NA	NA	4181.47
Acleris_variegana	Salzburg Stadt (ungenau) â€˘ 410-435 m â€˘ PG-0346	1961-07-01	1961	423.869	NA	2015-03-17	NA	NA	866.906
Acleris_variegana	Koppl: Guggenthal, Kohlhub, Alter Bach NE Kohlhub â€˘ PG-0392	2015-07-01	2015	563.714	NA	2015-03-17	NA	NA	4881.17
Acleris_variegana	Thalgau Ortsgebiet â€˘ KurzM-296 (1/1)	1988-07-01	1988	547.599	NA	1975-09-30	NA	NA	2115.7
Acleris_variegana	Koppl: Guggenthal, Kohlhub, Alter Bach NE Kohlhub â€˘ PG-0392	2013-07-01	2013	563.714	NA	2015-03-17	NA	NA	4881.17
Acleris_variegana	Koppl: Guggenthal, Kohlhub, Alter Bach NE Kohlhub â€˘ PG-0392	2012-07-01	2012	563.714	NA	2015-03-17	NA	NA	4881.17
Acleris_variegana	Hallwang: SĂ¶llheim â€˘ PG-0338	1966-07-01	1966	455.046	NA	1980-01-25	NA	NA	5036.4
Acleris_variegana	Hallwang: SĂ¶llheim â€˘ PG-0338	1967-07-01	1967	455.046	NA	1980-01-25	NA	NA	5036.4
Acleris_variegana	Hallwang: SĂ¶llheim â€˘ PG-0338	1966-07-01	1966	455.046	NA	1980-01-25	NA	NA	5036.4
Acleris_variegana	Maria Alm am Steinernem Meer: Natrun â€˘ GE-0172	2014-07-01	2014	1247.34	NA	1983-12-15	NA	NA	4181.47
Acleris_variegana	Hallwang: SĂ¶llheim â€˘ PG-0338	1967-07-01	1967	455.046	NA	1980-01-25	NA	NA	5036.4
Acleris_variegana	Salzburg Stadt: Nonntal, Thumegger Bezirk â€˘ GE-0012	2014-07-01	2014	424.724	NA	2015-03-17	NA	NA	357.071
Acleris_variegana	Salzburg Stadt: Nonntal, Thumegger Bezirk â€˘ GE-0012	2014-07-01	2014	424.724	NA	2015-03-17	NA	NA	357.071
Acleris_variegana	Maria Alm am Steinernem Meer: Natrun â€˘ GE-0172	2016-07-01	2016	1247.34	NA	1983-12-15	NA	NA	4181.47
Acleris_variegana	Maria Alm am Steinernem Meer: Natrun â€˘ GE-0172	2016-07-01	2016	1247.34	NA	1983-12-15	NA	NA	4181.47
Acleris_variegana	Maria Alm am Steinernem Meer: Natrun â€˘ GE-0172	2016-07-01	2016	1247.34	NA	1983-12-15	NA	NA	4181.47
Acleris_variegana	Maria Alm am Steinernem Meer: Natrun â€˘ GE-0172	2016-07-01	2016	1247.34	NA	1983-12-15	NA	NA	4181.47
Acleris_variegana	Maria Alm am Steinernem Meer: Natrun â€˘ GE-0172	2015-07-01	2015	1247.34	NA	1983-12-15	NA	NA	4181.47
Acleris_variegana	Maria Alm am Steinernem Meer: Natrun â€˘ GE-0172	2015-07-01	2015	1247.34	NA	1983-12-15	NA	NA	4181.47
Acleris_variegana	Maria Alm am Steinernem Meer: Natrun â€˘ GE-0172	2015-07-01	2015	1247.34	NA	1983-12-15	NA	NA	4181.47
Acleris_variegana	Maria Alm am Steinernem Meer: Natrun â€˘ GE-0172	2015-07-01	2015	1247.34	NA	1983-12-15	NA	NA	4181.47
Acleris_variegana	Koppl: Observation-Fundort â€˘ 13,09384/47,81735	2020-07-01	2020	567.64	NA	2015-03-17	NA	NA	4886.73
Acleris_variegana	Muhr: Pfeifenberger â€˘ PG-0090	2003-07-01	2003	1194.51	NA	1984-01-01	NA	NA	7016.32
Acleris_variegana	GroĂźgmain: KĂĽhbach-Tal, Veitlbruch â€˘ PG-0221	2005-07-01	2005	632.422	NA	2003-09-19	NA	NA	1829.15
Acleris_variegana	Koppl: Observation-Fundort â€˘ 13,09387/47,81730	2019-07-01	2019	567.972	NA	2015-03-17	NA	NA	4885.16
Acleris_variegana	Maria Alm am Steinernem Meer: Natrun â€˘ GE-0172	2013-07-01	2013	1247.34	NA	1983-12-15	NA	NA	4181.47
Acleris_variegana	Maria Alm am Steinernem Meer: Natrun â€˘ GE-0172	2016-07-01	2016	1247.34	NA	1983-12-15	NA	NA	4181.47
Acleris_variegana	Saalbach-Hinterglemm: Hinterglemm / hinteres Glemmtal (ungenau) â€˘ PG-0067	1968-07-01	1968	1320.96	NA	2018-12-31	NA	NA	12239.6
Acleris_variegana	Maria Alm am Steinernem Meer: Natrun â€˘ GE-0172	2013-07-01	2013	1247.34	NA	1983-12-15	NA	NA	4181.47
Acleris_variegana	Saalfelden am Steinernen Meer: Observation-Fundort â€˘ 12,84313/47,42822	2019-07-01	2019	736.38	NA	1983-12-15	NA	NA	3259.77
Acleris_variegana	Saalfelden am Steinernen Meer: Observation-Fundort â€˘ 12,84311/47,42818	2021-07-01	2021	736.612	NA	1983-12-15	NA	NA	3264.06
Acleris_variegana	Saalfelden am Steinernen Meer: Observation-Fundort â€˘ 12,84312/47,42823	2019-07-01	2019	736.56	NA	1983-12-15	NA	NA	3259.47
Acleris_variegana	Saalfelden am Steinernen Meer: Observation-Fundort â€˘ 12,84313/47,42822	2019-07-01	2019	736.38	NA	1983-12-15	NA	NA	3259.77
Acleris_variegana	Salzburg Stadt: Gaisberg, Judenberg â€˘ PG-0934	1974-07-01	1974	728.354	NA	2015-03-17	NA	NA	4387.31
Acleris_variegana	Thalgau: Enzersberg, BĂ¤rental â€˘ KurzM-348 (30/1)	1988-07-01	1988	643.04	NA	1975-09-30	NA	NA	5190.95
Acleris_variegana	Saalfelden am Steinernen Meer: Observation-Fundort â€˘ 12,84311/47,42818	2021-07-01	2021	736.612	NA	1983-12-15	NA	NA	3264.06
Acleris_variegana	Saalfelden am Stein.Meer Ortsgebiet: Neubaugasse	2017-07-01	2017	736.75	NA	1983-12-15	NA	NA	3245.07
Acleris_variegana	Maria Alm am Steinernem Meer: Natrun â€˘ GE-0172	2012-07-01	2012	1247.34	NA	1983-12-15	NA	NA	4181.47
Acleris_variegana	Maria Alm am Steinernem Meer: Natrun â€˘ GE-0172	2009-07-01	2009	1247.34	NA	1983-12-15	NA	NA	4181.47
Acleris_variegana	Maria Alm am Steinernem Meer: Natrun â€˘ GE-0172	2015-07-01	2015	1247.34	NA	1983-12-15	NA	NA	4181.47
Acleris_variegana	Maria Alm am Steinernem Meer: Natrun â€˘ GE-0172	2015-07-01	2015	1247.34	NA	1983-12-15	NA	NA	4181.47
Acleris_variegana	Saalfelden am Steinernen Meer: Observation-Fundort â€˘ 12,84314/47,42823	2019-07-01	2019	736.56	NA	1983-12-15	NA	NA	3258.44
Acleris_variegana	Saalfelden am Steinernen Meer: Observation-Fundort â€˘ 12,84314/47,42823	2019-07-01	2019	736.56	NA	1983-12-15	NA	NA	3258.44
Acleris_variegana	Maria Alm am Steinernem Meer: Natrun â€˘ GE-0172	2011-07-01	2011	1247.34	NA	1983-12-15	NA	NA	4181.47
Acleris_variegana	Saalfelden am Steinernen Meer: Observation-Fundort â€˘ 12,82535/47,40316	2021-07-01	2021	742.09	NA	1983-12-15	NA	NA	6280.31
Acleris_variegana	Maria Alm am Steinernem Meer: Natrun â€˘ GE-0172	2015-07-01	2015	1247.34	NA	1983-12-15	NA	NA	4181.47
Acleris_variegana	Maria Alm am Steinernem Meer: Natrun â€˘ GE-0172	2015-07-01	2015	1247.34	NA	1983-12-15	NA	NA	4181.47
Acleris_variegana	Muhr: Pfeifenberger â€˘ PG-0090	2012-07-01	2012	1194.51	NA	1984-01-01	NA	NA	7016.32
Acleris_variegana	Muhr: Pfeifenberger â€˘ PG-0090	2004-07-01	2004	1194.51	NA	1984-01-01	NA	NA	7016.32
Acleris_variegana	Saalfelden am Steinernen Meer: Observation-Fundort â€˘ 12,84312/47,42823	2021-07-01	2021	736.56	NA	1983-12-15	NA	NA	3259.47
Acleris_variegana	Saalfelden am Steinernen Meer Ortsgebiet â€˘ PG-0281	2016-07-01	2016	740	NA	1983-12-15	NA	NA	3104.28
Acleris_variegana	Maria Alm am Steinernem Meer: Natrun â€˘ GE-0172	2015-07-01	2015	1247.34	NA	1983-12-15	NA	NA	4181.47
Acleris_variegana	Saalfelden am Steinernen Meer: Observation-Fundort â€˘ 12,84314/47,42824	2019-07-01	2019	736.56	NA	1983-12-15	NA	NA	3257.63
Acontia_lucida	Muhr: Hintermuhr, Jedl â€˘ N â€˘ PG-1207	2015-07-01	2015	1261.33	NA	1984-01-01	NA	NA	5894.9
Acronicta_aceris	Oberndorf bei Salzburg: Stadtgebiet â€˘ GE-0166	1963-07-01	1963	401.06	NA	2002-12-03	NA	NA	69.9502
Acronicta_aceris	Salzburg Stadt (ungenau) â€˘ 410-435 m â€˘ PG-0346	1930-07-01	1930	423.869	NA	2015-03-17	NA	NA	866.906
Acronicta_aceris	Oberndorf bei Salzburg: Stadtgebiet â€˘ GE-0166	1963-07-01	1963	401.06	NA	2002-12-03	NA	NA	69.9502
Acronicta_aceris	Golling an der Salzach: Pass Lueg â€˘ POE-0018	2011-07-01	2011	495.44	NA	1983-12-15	NA	NA	552.641
Acronicta_aceris	Koppl: Guggenthal, Kohlhub, Alter Bach NE Kohlhub â€˘ PG-0392	2009-07-01	2009	563.714	NA	2015-03-17	NA	NA	4881.17
Acronicta_aceris	Saalfelden am Stein.Meer Ortsgebiet: Neubaugasse	2017-07-01	2017	736.75	NA	1983-12-15	NA	NA	3245.07
Acronicta_aceris	St. Gilgen: FĂĽrberg, Falkenstein-Weg, "Scheffelblick" â€˘ PG-1325	2005-07-01	2005	693.45	NA	1973-07-27	NA	NA	5170.46
Acronicta_aceris	GroĂźarl: Observation-Fundort â€˘ 13,19309/47,24785	2022-07-01	2022	928.91	NA	1990-04-27	NA	NA	3144.68
Acronicta_aceris	GroĂźarl: Observation-Fundort â€˘ 13,19359/47,24774	2022-07-01	2022	922.55	NA	1990-04-27	NA	NA	3181.69
Acronicta_aceris	Koppl: Observation-Fundort â€˘ 13,09376/47,8174	2022-07-01	2022	563.862	NA	2015-03-17	NA	NA	4885.34
Acronicta_aceris	Koppl: Guggenthal, Kohlhub, Alter Bach NE Kohlhub â€˘ PG-0392	2009-07-01	2009	563.714	NA	2015-03-17	NA	NA	4881.17
Acronicta_aceris	Lofer: Loferbach-Tal, "Steppenhang" â€˘ PG-0420	2009-07-01	2009	643.03	NA	2018-12-31	NA	NA	5143.58
Acronicta_aceris	Lofer: Loferbach-Tal, "Steppenhang" â€˘ PG-0420	2009-07-01	2009	643.03	NA	2018-12-31	NA	NA	5143.58
Acronicta_aceris	Salzburg Stadt: MĂ¶nchsberg â€˘ PG-0658	1951-07-01	1951	431.537	NA	2015-03-17	NA	NA	878.234
Acronicta_aceris	Elsbethen Ortsgebiet â€˘ PG-0659	1935-07-01	1935	427.825	NA	2015-03-17	NA	NA	3319.8
Acronicta_aceris	Puch bei Hallein Ortsgebiet â€˘ PG-1650	1967-07-01	1967	439.942	NA	2002-12-03	NA	NA	6589.22
Acronicta_aceris	Wals-Siezenheim: Gois, Mooswiesen, "Goiser Moor" â€˘ PG-0205	1936-07-01	1936	437.362	NA	2016-02-01	NA	NA	1529.79
Acronicta_aceris	Salzburg Stadt: Aigen, Parsch â€˘ PG-0208	1954-07-01	1954	432.161	NA	2015-03-17	NA	NA	2878
Acronicta_aceris	Salzburg Stadt: Leopoldskron-Moos, Leopoldskroner Weiher â€˘ GE-0023	1990-07-01	1990	430.626	NA	2015-03-17	NA	NA	51.6804
Acronicta_aceris	Salzburg Stadt: Aigen, Parsch â€˘ PG-0208	2016-07-01	2016	432.161	NA	2015-03-17	NA	NA	2878
Acronicta_aceris	Salzburg Stadt: Aigen, Parsch â€˘ PG-0208	1956-07-01	1956	432.161	NA	2015-03-17	NA	NA	2878
Acronicta_aceris	St. Gilgen: Kienberg, Mondsee-Ufer bei Scharfling (St. Lorenz, OĂ–) â€˘ GE-0025	2008-07-01	2008	481.93	NA	1973-07-27	NA	NA	8928.64
Acronicta_aceris	St. Gilgen: Kienberg, Mondsee-Ufer bei Scharfling (St. Lorenz, OĂ–) â€˘ GE-0025	2001-07-01	2001	481.93	NA	1973-07-27	NA	NA	8928.64
Acronicta_aceris	St. Gilgen: Kienberg, Mondsee-Ufer bei Scharfling (St. Lorenz, OĂ–) â€˘ GE-0025	2012-07-01	2012	481.93	NA	1973-07-27	NA	NA	8928.64
Acronicta_aceris	St. Georgen bei Salzburg: Roding â€˘ PG-0679	1974-07-01	1974	446.205	NA	2002-12-03	NA	NA	1009.66
Acronicta_aceris	Salzburg Stadt: MĂ¶nchsberg, Festungsberg â€˘ PG-1211	1913-07-01	1913	531.551	NA	2015-03-17	NA	NA	662.791
Acronicta_aceris	Salzburg Stadt: Hallwang, Kasern â€˘ PG-0273	1956-07-01	1956	498.487	NA	2015-03-17	NA	NA	5051.82
Acronicta_aceris	Elsbethen: Glasenbach â€˘ PG-0204	1954-07-01	1954	446.145	NA	2015-03-17	NA	NA	3738.89
Acronicta_aceris	GrĂ¶dig: FĂĽrstenbrunn, Wh. Esterer â€˘ N â€˘ PG-0474	1956-07-01	1956	439.55	NA	2018-12-31	NA	NA	537.151
Acronicta_aceris	Hallein: Rif â€˘ GE-0191	1960-07-01	1960	434.276	NA	2015-03-17	NA	NA	4967.98
Acronicta_aceris	St. Georgen bei Salzburg: Roding â€˘ PG-0679	1972-07-01	1972	446.205	NA	2002-12-03	NA	NA	1009.66
Acronicta_aceris	Hallwang: SĂ¶llheim â€˘ PG-0338	1957-07-01	1957	455.046	NA	1980-01-25	NA	NA	5036.4
Acronicta_aceris	Salzburg Stadt: Aigen, Parsch â€˘ PG-0208	2014-07-01	2014	432.161	NA	2015-03-17	NA	NA	2878
Acronicta_aceris	Salzburg Stadt: Aigen, Parsch â€˘ PG-0208	1961-07-01	1961	432.161	NA	2015-03-17	NA	NA	2878
Acronicta_aceris	Salzburg Stadt: Aigen, Parsch â€˘ PG-0208	2015-07-01	2015	432.161	NA	2015-03-17	NA	NA	2878
Acronicta_aceris	Salzburg Stadt: Aigen, Parsch â€˘ PG-0208	2014-07-01	2014	432.161	NA	2015-03-17	NA	NA	2878
Acronicta_aceris	St. Gilgen: Kienberg, Mondsee-Ufer bei Scharfling (St. Lorenz, OĂ–) â€˘ GE-0025	2006-07-01	2006	481.93	NA	1973-07-27	NA	NA	8928.64
Acronicta_aceris	St. Gilgen: Kienberg, Mondsee-Ufer bei Scharfling (St. Lorenz, OĂ–) â€˘ GE-0025	2004-07-01	2004	481.93	NA	1973-07-27	NA	NA	8928.64
Acronicta_aceris	St. Gilgen: Kienberg, Mondsee-Ufer bei Scharfling (St. Lorenz, OĂ–) â€˘ GE-0025	2012-07-01	2012	481.93	NA	1973-07-27	NA	NA	8928.64
Acronicta_aceris	Salzburg Stadt: Hallwang, Kasern â€˘ PG-0273	1954-07-01	1954	498.487	NA	2015-03-17	NA	NA	5051.82
Acronicta_aceris	Salzburg Stadt: Hallwang, Kasern â€˘ PG-0273	1946-07-01	1946	498.487	NA	2015-03-17	NA	NA	5051.82
Acronicta_aceris	St. Gilgen: Kienberg, Mondsee-Ufer bei Scharfling (St. Lorenz, OĂ–) â€˘ GE-0025	2003-07-01	2003	481.93	NA	1973-07-27	NA	NA	8928.64
Acronicta_aceris	Golling an der Salzach: ObergĂ¤u, Luegwinkl â€˘ PG-1322	2005-07-01	2005	474.54	NA	1983-12-15	NA	NA	2352.07
Acronicta_aceris	Salzburg Stadt: Itzling â€˘ PG-0667	1954-07-01	1954	418.512	NA	2015-03-17	NA	NA	3375.2
Acronicta_aceris	Salzburg Stadt (ungenau) â€˘ 410-435 m â€˘ PG-0346	1904-07-01	1904	423.869	NA	2015-03-17	NA	NA	866.906
Acronicta_aceris	Salzburg Stadt: Nonntal, Thumegger Bezirk â€˘ GE-0012	1998-07-01	1998	424.724	NA	2015-03-17	NA	NA	357.071
Acronicta_aceris	Salzburg Stadt: Nonntal, Thumegger Bezirk â€˘ GE-0012	1972-07-01	1972	424.724	NA	2015-03-17	NA	NA	357.071
Acronicta_aceris	Muhr: Pfeifenberger â€˘ PG-0090	1993-07-01	1993	1194.51	NA	1984-01-01	NA	NA	7016.32
Acronicta_aceris	Muhr: Observation-Fundort â€˘ 13,4979/47,09905	2022-07-01	2022	1120.91	NA	1984-01-01	NA	NA	7283.16
Acronicta_aceris	Salzburg Stadt: Aigen, Parsch â€˘ PG-0208	1957-07-01	1957	432.161	NA	2015-03-17	NA	NA	2878
Acronicta_aceris	Salzburg Stadt: Aigen, Parsch â€˘ PG-0208	1956-07-01	1956	432.161	NA	2015-03-17	NA	NA	2878
Acronicta_aceris	Salzburg Stadt: Aigen, Parsch â€˘ PG-0208	1960-07-01	1960	432.161	NA	2015-03-17	NA	NA	2878
Acronicta_aceris	Salzburg Stadt: Aigen, Parsch â€˘ PG-0208	1957-07-01	1957	432.161	NA	2015-03-17	NA	NA	2878
Acronicta_aceris	Salzburg Stadt: Aigen, Parsch â€˘ PG-0208	1935-07-01	1935	432.161	NA	2015-03-17	NA	NA	2878
Acronicta_aceris	Salzburg Stadt: Nonntal, Thumegger Bezirk â€˘ GE-0012	2013-07-01	2013	424.724	NA	2015-03-17	NA	NA	357.071
Acronicta_aceris	Salzburg Stadt: Aigen, Parsch â€˘ PG-0208	1955-07-01	1955	432.161	NA	2015-03-17	NA	NA	2878
Acronicta_aceris	Salzburg Stadt: Aigen, Parsch â€˘ PG-0208	1955-07-01	1955	432.161	NA	2015-03-17	NA	NA	2878
Acronicta_aceris	Golling an der Salzach: Pass Lueg â€˘ POE-0018	2011-07-01	2011	495.44	NA	1983-12-15	NA	NA	552.641
Acronicta_aceris	Golling an der Salzach: Pass Lueg â€˘ POE-0018	2011-07-01	2011	495.44	NA	1983-12-15	NA	NA	552.641
Acronicta_aceris	Hallwang Ortsgebiet â€˘ PG-0330	1945-07-01	1945	509.733	NA	1980-01-25	NA	NA	3857.03
Acronicta_aceris	Golling an der Salzach: PaĂź Lueg â€˘ PG-0538	2013-07-01	2013	550.88	NA	1982-02-16	NA	NA	1959.16
Acronicta_aceris	Golling an der Salzach: PaĂź Lueg â€˘ PG-0538	2015-07-01	2015	550.88	NA	1982-02-16	NA	NA	1959.16
Acronicta_aceris	Golling an der Salzach: PaĂź Lueg â€˘ PG-0538	2014-07-01	2014	550.88	NA	1982-02-16	NA	NA	1959.16
Acronicta_aceris	Saalfelden am Steinernen Meer: Observation-Fundort â€˘ 12,84313/47,42824	2019-07-01	2019	736.56	NA	1983-12-15	NA	NA	3258.14
Acronicta_aceris	Saalfelden am Steinernen Meer: Observation-Fundort â€˘ 12,84313/47,42823	2020-07-01	2020	736.56	NA	1983-12-15	NA	NA	3258.96
Acronicta_aceris	Maria Alm am Steinernem Meer: Natrun â€˘ GE-0172	2014-07-01	2014	1247.34	NA	1983-12-15	NA	NA	4181.47
Acronicta_aceris	Zell am See Ortsgebiet â€˘ PG-0780	1953-07-01	1953	759.13	NA	1972-12-28	NA	NA	1238.34
Acronicta_aceris	Saalfelden am Steinernen Meer: Observation-Fundort â€˘ 12,82545/47,40364	2021-07-01	2021	737.7	NA	1983-12-15	NA	NA	6233.16
Acronicta_aceris	St. Gilgen: FĂĽrberg, Falkenstein-Weg, "Scheffelblick" â€˘ PG-1325	2009-07-01	2009	693.45	NA	1973-07-27	NA	NA	5170.46
Acronicta_aceris	Saalfelden am Steinernen Meer: Observation-Fundort â€˘ 12,84312/47,42823	2021-07-01	2021	736.56	NA	1983-12-15	NA	NA	3259.47
Acronicta_aceris	Saalfelden am Steinernen Meer: Observation-Fundort â€˘ 12,84313/47,42822	2022-07-01	2022	736.38	NA	1983-12-15	NA	NA	3259.77
Acronicta_aceris	Salzburg-Stadt: Observation-Fundort â€˘ 13,0399/47,80325	2022-07-01	2022	417.941	NA	2015-03-17	NA	NA	1402.03
Acronicta_aceris	Salzburg (Stadt): Observation-Fundort â€˘ 13,05902/47,78690	2021-07-01	2021	421.142	NA	2015-03-17	NA	NA	1273.95
Acronicta_aceris	Salzburg (Stadt): Observation-Fundort â€˘ 13,04455/47,82746	2021-07-01	2021	416.693	NA	2015-03-17	NA	NA	4089.84
Acronicta_aceris	Werfen: Observation-Fundort â€˘ 13,17304/47,43307	2020-07-01	2020	933.07	NA	1983-12-15	NA	NA	1818.85
Acronicta_aceris	Rauris: WĂ¶rth â€˘ PG-0025	1959-07-01	1959	958.6	NA	1984-01-01	NA	NA	606.919
Acronicta_aceris	Strobl: Observation-Fundort â€˘ 13,51278/47,68833	2022-07-01	2022	1137.65	NA	1973-07-27	NA	NA	4164.55
Acronicta_aceris	Strobl: Observation-Fundort â€˘ 13,51278/47,68833	2022-07-01	2022	1137.65	NA	1973-07-27	NA	NA	4164.55
Acronicta_aceris	Koppl: Guggenthal, Kohlhub, Alter Bach NE Kohlhub â€˘ PG-0392	2012-07-01	2012	563.714	NA	2015-03-17	NA	NA	4881.17
Acronicta_aceris	Koppl: Guggenthal, Kohlhub, Alter Bach NE Kohlhub â€˘ PG-0392	2018-07-01	2018	563.714	NA	2015-03-17	NA	NA	4881.17
Acronicta_aceris	Koppl: Observation-Fundort â€˘ 13,09356/47,81716	2021-07-01	2021	567.571	NA	2015-03-17	NA	NA	4857.26
Acronicta_aceris	Koppl: Guggenthal, Kohlhub, Alter Bach NE Kohlhub â€˘ PG-0392	2017-07-01	2017	563.714	NA	2015-03-17	NA	NA	4881.17
Acronicta_aceris	Koppl: Guggenthal, Kohlhub, Alter Bach NE Kohlhub â€˘ PG-0392	2010-07-01	2010	563.714	NA	2015-03-17	NA	NA	4881.17
Acronicta_aceris	Koppl: Guggenthal, Kohlhub, Alter Bach NE Kohlhub â€˘ PG-0392	2009-07-01	2009	563.714	NA	2015-03-17	NA	NA	4881.17
Acronicta_aceris	Faistenau: Observation-Fundort â€˘ 13,25018/47,74679	2022-07-01	2022	686.45	NA	1975-09-30	NA	NA	6824.9
Acronicta_aceris	St. Veit im Pongau Ortsgebiet â€˘ PG-0388	1920-07-01	1920	749.85	NA	1990-04-27	NA	NA	3888.52
Acronicta_aceris	Abtenau Ortsgebiet â€˘ PG-0354	1927-07-01	1927	714.61	NA	1982-02-16	NA	NA	2658.48
Acronicta_aceris	Saalfelden am Steinernen Meer Ortsgebiet â€˘ PG-0281	1954-07-01	1954	740	NA	1983-12-15	NA	NA	3104.28
Acronicta_aceris	Koppl: Observation-Fundort â€˘ 13,09383/47,81735	2021-07-01	2021	567.64	NA	2015-03-17	NA	NA	4886.14
Acronicta_aceris	Koppl: Observation-Fundort â€˘ 13,09386/47,81734	2020-07-01	2020	567.64	NA	2015-03-17	NA	NA	4887.25
Acronicta_aceris	GroĂźgmain: KĂĽhbach-Tal, Veitlbruch â€˘ PG-0221	1982-07-01	1982	632.422	NA	2003-09-19	NA	NA	1829.15
Acronicta_aceris	Werfen: Observation-Fundort â€˘ 13,18384/47,47763	2022-07-01	2022	642.71	NA	1982-02-16	NA	NA	2609.76
Acronicta_aceris	St. Gilgen: Kienberg, Mondsee-Ufer bei Scharfling (St. Lorenz, OĂ–) â€˘ GE-0025	2010-07-01	2010	481.93	NA	1973-07-27	NA	NA	8928.64
Acronicta_aceris	St. Gilgen: Kienberg, Mondsee-Ufer bei Scharfling (St. Lorenz, OĂ–) â€˘ GE-0025	2006-07-01	2006	481.93	NA	1973-07-27	NA	NA	8928.64
Acronicta_aceris	Salzburg - Rainberg: Observation-Fundort â€˘ 13,03582/47,79454	2021-07-01	2021	446.391	NA	2015-03-17	NA	NA	621.558
Acronicta_aceris	Golling an der Salzach Ortsgebiet â€˘ PG-0225	1961-07-01	1961	467.92	NA	2002-12-03	NA	NA	1771.24
Acronicta_aceris	Salzburg - Rainberg: Observation-Fundort â€˘ 13,03596/47,79464	2021-07-01	2021	459.534	NA	2015-03-17	NA	NA	621.776
Acronicta_aceris	Salzburg - Rainberg: Observation-Fundort â€˘ 13,03586/47,79458	2021-07-01	2021	452.248	NA	2015-03-17	NA	NA	622.463
Acronicta_aceris	Hallwang Ortsgebiet â€˘ PG-0330	1933-07-01	1933	509.733	NA	1980-01-25	NA	NA	3857.03
Acronicta_aceris	Salzburg Stadt: Riedenburg, Rainberg â€˘ PG-0381	1988-07-01	1988	445.517	NA	2015-03-17	NA	NA	711.944
Acronicta_aceris	Salzburg Stadt: Morzg, Hellbrunn, Alter Bach, Salzach-Au / "Hellbrunner Au" â€˘ PG-0701	1953-07-01	1953	428.055	NA	2015-03-17	NA	NA	2729.7
Acronicta_aceris	Salzburg Stadt: MĂ¶nchsberg â€˘ PG-0658	1928-07-01	1928	431.537	NA	2015-03-17	NA	NA	878.234
Acronicta_aceris	Salzburg Stadt: MĂ¶nchsberg â€˘ PG-0658	1924-07-01	1924	431.537	NA	2015-03-17	NA	NA	878.234
Acronicta_aceris	Salzburg-Stadt: Observation-Fundort â€˘ 13,05148/47,78196	2022-07-01	2022	424.24	NA	2015-03-17	NA	NA	692.087
Acronicta_aceris	Salzburg Stadt: Aigen, Parsch â€˘ PG-0208	1957-07-01	1957	432.161	NA	2015-03-17	NA	NA	2878
Acronicta_aceris	Salzburg Stadt: Aigen, Parsch â€˘ PG-0208	1955-07-01	1955	432.161	NA	2015-03-17	NA	NA	2878
Acronicta_aceris	St. Georgen bei Salzburg: Roding â€˘ PG-0679	1971-07-01	1971	446.205	NA	2002-12-03	NA	NA	1009.66
Acronicta_aceris	St. Georgen bei Salzburg: Roding â€˘ PG-0679	1973-07-01	1973	446.205	NA	2002-12-03	NA	NA	1009.66
Acronicta_aceris	Hallein: Observation-Fundort â€˘ 13,11599/47,68967	2021-07-01	2021	453.249	NA	2002-12-03	NA	NA	3497.18
Acronicta_aceris	Salzburg Stadt: Hallwang, Kasern â€˘ PG-0273	1959-07-01	1959	498.487	NA	2015-03-17	NA	NA	5051.82
Acronicta_aceris	Hallwang: SĂ¶llheim â€˘ PG-0338	1955-07-01	1955	455.046	NA	1980-01-25	NA	NA	5036.4
Acronicta_aceris	Puch bei Hallein Ortsgebiet â€˘ PG-1650	1971-07-01	1971	439.942	NA	2002-12-03	NA	NA	6589.22
Acronicta_aceris	Hallwang: SĂ¶llheim â€˘ PG-0338	1958-07-01	1958	455.046	NA	1980-01-25	NA	NA	5036.4
Acronicta_aceris	Hallwang: SĂ¶llheim â€˘ PG-0338	1958-07-01	1958	455.046	NA	1980-01-25	NA	NA	5036.4
Acronicta_aceris	Abtenau Ortsgebiet â€˘ PG-0354	1929-07-01	1929	714.61	NA	1982-02-16	NA	NA	2658.48
Acronicta_aceris	Abtenau Ortsgebiet â€˘ PG-0354	1929-07-01	1929	714.61	NA	1982-02-16	NA	NA	2658.48
Acronicta_aceris	Saalbach-Hinterglemm: Observation-Fundort â€˘ 12,66416/47,38297	2022-07-01	2022	982.74	NA	2016-02-01	NA	NA	11772
Acronicta_aceris	Radstadt: Observation-Fundort â€˘ 13,47102/47,38618	2022-07-01	2022	831.91	NA	1981-05-14	NA	NA	8089.08
Acronicta_aceris	Koppl: Observation-Fundort â€˘ 13,10604/47,81808	2022-07-01	2022	635.38	NA	2015-03-17	NA	NA	5683.83
Acronicta_aceris	GroĂźgmain: KĂĽhbach-Tal, Veitlbruch â€˘ PG-0221	1987-07-01	1987	632.422	NA	2003-09-19	NA	NA	1829.15
Acronicta_aceris	Salzburg Stadt: Gaisberg, Judenberg â€˘ PG-0934	1959-07-01	1959	728.354	NA	2015-03-17	NA	NA	4387.31
Acronicta_aceris	Lofer: Loferbach-Tal, "Steppenhang" â€˘ PG-0420	2009-07-01	2009	643.03	NA	2018-12-31	NA	NA	5143.58
Acronicta_aceris	Salzburg Stadt: Aigen, Parsch â€˘ PG-0208	1955-07-01	1955	432.161	NA	2015-03-17	NA	NA	2878
Acronicta_aceris	Salzburg-Stadt: Observation-Fundort â€˘ 13,04340/47,80188	2020-07-01	2020	413.872	NA	2015-03-17	NA	NA	1246.22
Acronicta_aceris	GĂ¶ming: Observation-Fundort â€˘ 12,95374/47,96150	2021-07-01	2021	444.476	NA	2002-12-03	NA	NA	2240.04
Acronicta_aceris	Salzburg Stadt: Aigen, Parsch â€˘ PG-0208	1956-07-01	1956	432.161	NA	2015-03-17	NA	NA	2878
Acronicta_aceris	Muhr: Pfeifenberger â€˘ PG-0090	1992-07-01	1992	1194.51	NA	1984-01-01	NA	NA	7016.32
Acronicta_aceris	Muhr: Pfeifenberger â€˘ PG-0090	2005-07-01	2005	1194.51	NA	1984-01-01	NA	NA	7016.32
Acronicta_aceris	Bergheim: Siggerwiesen â€˘ GE-0007	1996-07-01	1996	404.164	NA	2002-12-03	NA	NA	904.384
Acronicta_aceris	Muhr: Observation-Fundort â€˘ 13,37858/47,14877	2021-07-01	2021	1746.88	NA	1984-01-01	NA	NA	2057.11
Acronicta_aceris	GrĂ¶dig: Observation-Fundort â€˘ 13,02734/47,73952	2021-07-01	2021	555.666	NA	2015-03-17	NA	NA	2424.59
Acronicta_aceris	Golling an der Salzach: Pass Lueg â€˘ POE-0018	2010-07-01	2010	495.44	NA	1983-12-15	NA	NA	552.641
Acronicta_aceris	Golling an der Salzach: PaĂź Lueg â€˘ PG-0538	2014-07-01	2014	550.88	NA	1982-02-16	NA	NA	1959.16
Acronicta_aceris	Koppl: Observation-Fundort â€˘ 13,09387/47,81735	2021-07-01	2021	567.64	NA	2015-03-17	NA	NA	4888.52
Acronicta_aceris	Koppl: Observation-Fundort â€˘ 13,09357/47,81720	2021-07-01	2021	567.574	NA	2015-03-17	NA	NA	4860.55
Acronicta_aceris	GroĂźgmain: Observation-Fundort â€˘ 12,91992/47,73958	2022-07-01	2022	517.45	NA	2003-09-19	NA	NA	1429.42
Acronicta_aceris	Puch bei Hallein: Observation-Fundort â€˘ 13,08796/47,72386	2022-07-01	2022	441.286	NA	2015-03-17	NA	NA	5589.61
Acronicta_aceris	Puch bei Hallein: Observation-Fundort â€˘ 13,08807/47,72394	2022-07-01	2022	441.51	NA	2015-03-17	NA	NA	5588.83
Acronicta_aceris	Hallwang Ortsgebiet â€˘ PG-0330	1935-07-01	1935	509.733	NA	1980-01-25	NA	NA	3857.03
Acronicta_aceris	Anthering: Observation-Fundort â€˘ 13,01876/47,88662	2021-07-01	2021	458.818	NA	2002-12-03	NA	NA	1517.38
Acronicta_aceris	Thalgau: Observation-Fundort â€˘ 13,31206/47,81287	2019-07-01	2019	1295.41	NA	1975-09-30	NA	NA	3888.19
Acronicta_aceris	Kleinarl: Observation-Fundort â€˘ 13,3317/47,23155	2022-07-01	2022	1104.24	NA	2016-02-01	NA	NA	8768.1
Acronicta_aceris	GroĂźgmain: Observation-Fundort â€˘ 12,93502/47,72429	2021-07-01	2021	640.225	NA	2003-09-19	NA	NA	2148.7
Acronicta_aceris	Bischofshofen Ortsgebiet â€˘ PG-0626	1959-07-01	1959	545.94	NA	1983-12-15	NA	NA	5656.15
Acronicta_aceris	GroĂźarl: Observation-Fundort â€˘ 13,19299/47,24793	2022-07-01	2022	929.65	NA	1990-04-27	NA	NA	3133.18
Acronicta_aceris	Saalfelden am Steinernen Meer: Observation-Fundort â€˘ 12,82685/47,40223	2021-07-01	2021	765.95	NA	1983-12-15	NA	NA	6285.57
Acronicta_alni	Koppl: Guggenthal, Kohlhub, Alter Bach NE Kohlhub â€˘ PG-0392	2007-07-01	2007	563.714	NA	2015-03-17	NA	NA	4881.17
Acronicta_alni	St. Johann im Pongau Ortsgebiet â€˘ PG-0386	1968-07-01	1968	614.78	NA	1990-04-27	NA	NA	6144.43
Acronicta_alni	Koppl: Observation-Fundort â€˘ 13,09377/47,81744	2022-07-01	2022	563.862	NA	2015-03-17	NA	NA	4888.64
Acronicta_alni	Koppl: Guggenthal, Kohlhub, Alter Bach NE Kohlhub â€˘ PG-0392	2007-07-01	2007	563.714	NA	2015-03-17	NA	NA	4881.17
Acronicta_alni	St. Gilgen: FĂĽrberg, Falkenstein-Weg, "Scheffelblick" â€˘ PG-1325	2005-07-01	2005	693.45	NA	1973-07-27	NA	NA	5170.46
Acronicta_alni	Salzburg Stadt: Gaisberg, Kapaunberg â€˘ PG-0737	1989-07-01	1989	752.263	NA	2015-03-17	NA	NA	4380.04
Acronicta_alni	Koppl: Winkl, "Spechtenschmiede" â€˘ W â€˘ PG-0909	1973-07-01	1973	742.43	NA	1975-09-30	NA	NA	7098.18
Acronicta_alni	Koppl: Winkl, "Spechtenschmiede" â€˘ W â€˘ PG-0909	1973-07-01	1973	742.43	NA	1975-09-30	NA	NA	7098.18
Acronicta_alni	Bischofshofen: MĂĽhlbach-Tal, Haidberg â€˘ PG-0606	1975-07-01	1975	961.86	NA	1983-12-15	NA	NA	4127.99
Acronicta_alni	Bischofshofen: MĂĽhlbach-Tal, Haidberg â€˘ PG-0606	1973-07-01	1973	961.86	NA	1983-12-15	NA	NA	4127.99
Acronicta_alni	Salzburg Stadt: Gaisberg, Judenberg â€˘ PG-0934	1971-07-01	1971	728.354	NA	2015-03-17	NA	NA	4387.31
Acronicta_alni	GroĂźgmain: KĂĽhbach-Tal, Veitlbruch â€˘ PG-0221	1985-07-01	1985	632.422	NA	2003-09-19	NA	NA	1829.15
Acronicta_alni	Salzburg Stadt: Hallwang, Kasern â€˘ PG-0273	1960-07-01	1960	498.487	NA	2015-03-17	NA	NA	5051.82
Acronicta_alni	Salzburg Stadt: Hallwang, Kasern â€˘ PG-0273	1960-07-01	1960	498.487	NA	2015-03-17	NA	NA	5051.82
Acronicta_alni	Salzburg Stadt: Hallwang, Kasern â€˘ PG-0273	1960-07-01	1960	498.487	NA	2015-03-17	NA	NA	5051.82
Acronicta_alni	Salzburg Stadt: Hallwang, Kasern â€˘ PG-0273	1960-07-01	1960	498.487	NA	2015-03-17	NA	NA	5051.82
Acronicta_alni	Salzburg Stadt: Innere Stadt, Kapuzinerberg â€˘ PG-0736	1975-07-01	1975	623.933	NA	2015-03-17	NA	NA	1992.32
Acronicta_alni	Anif: Neu Anif â€˘ PG-0746	1971-07-01	1971	446.733	NA	2015-03-17	NA	NA	2972.51
Acronicta_alni	Salzburg Stadt: Hallwang, Kasern â€˘ PG-0273	1960-07-01	1960	498.487	NA	2015-03-17	NA	NA	5051.82
Acronicta_alni	Salzburg Stadt: Hallwang, Kasern â€˘ PG-0273	1958-07-01	1958	498.487	NA	2015-03-17	NA	NA	5051.82
Acronicta_alni	St. Gilgen: Kienberg, Mondsee-Ufer bei Scharfling (St. Lorenz, OĂ–) â€˘ GE-0025	2008-07-01	2008	481.93	NA	1973-07-27	NA	NA	8928.64
Acronicta_alni	St. Gilgen: Kienberg, Mondsee-Ufer bei Scharfling (St. Lorenz, OĂ–) â€˘ GE-0025	2007-07-01	2007	481.93	NA	1973-07-27	NA	NA	8928.64
Acronicta_alni	Salzburg Stadt: Hallwang, Kasern â€˘ PG-0273	1960-07-01	1960	498.487	NA	2015-03-17	NA	NA	5051.82
Acronicta_alni	St. Gilgen: Kienberg, Mondsee-Ufer bei Scharfling (St. Lorenz, OĂ–) â€˘ GE-0025	2006-07-01	2006	481.93	NA	1973-07-27	NA	NA	8928.64
Acronicta_alni	Salzburg Stadt: Aigen, Parsch â€˘ PG-0208	1956-07-01	1956	432.161	NA	2015-03-17	NA	NA	2878
Acronicta_alni	Salzburg Stadt: Aigen, Parsch â€˘ PG-0208	1954-07-01	1954	432.161	NA	2015-03-17	NA	NA	2878
Acronicta_alni	Salzburg Stadt: MĂ¶nchsberg, Festungsberg â€˘ PG-1211	1917-07-01	1917	531.551	NA	2015-03-17	NA	NA	662.791
Acronicta_alni	Salzburg Stadt: Aigen, Parsch â€˘ PG-0208	1960-07-01	1960	432.161	NA	2015-03-17	NA	NA	2878
Acronicta_alni	St. Gilgen: Kienberg, Mondsee-Ufer bei Scharfling (St. Lorenz, OĂ–) â€˘ GE-0025	2012-07-01	2012	481.93	NA	1973-07-27	NA	NA	8928.64
Acronicta_alni	Golling an der Salzach: ObergĂ¤u, Luegwinkl â€˘ PG-1322	2005-07-01	2005	474.54	NA	1983-12-15	NA	NA	2352.07
Acronicta_alni	Golling an der Salzach Ortsgebiet â€˘ PG-0225	1957-07-01	1957	467.92	NA	2002-12-03	NA	NA	1771.24
Acronicta_alni	St. Gilgen: Kienberg, Mondsee-Ufer bei Scharfling (St. Lorenz, OĂ–) â€˘ GE-0025	2009-07-01	2009	481.93	NA	1973-07-27	NA	NA	8928.64
Acronicta_alni	St. Gilgen: Kienberg, Mondsee-Ufer bei Scharfling (St. Lorenz, OĂ–) â€˘ GE-0025	2001-07-01	2001	481.93	NA	1973-07-27	NA	NA	8928.64
Acronicta_alni	GroĂźarl: Observation-Fundort â€˘ 13,19284/47,24792	2022-07-01	2022	932.36	NA	1990-04-27	NA	NA	3125.14
Acronicta_alni	Maria Alm am Steinernem Meer: Natrun â€˘ GE-0172	2012-07-01	2012	1247.34	NA	1983-12-15	NA	NA	4181.47
Acronicta_alni	Thomatal Ortsgebiet â€˘ GE-0017	1975-07-01	1975	1053.14	NA	2015-03-17	NA	NA	4289.69
Acronicta_alni	Piesendorf: Walchen â€˘ GE-0013	1985-07-01	1985	861.48	NA	2016-02-01	NA	NA	3261.59
Acronicta_alni	Koppl: Winkl, "Spechtenschmiede" â€˘ W â€˘ PG-0909	1976-07-01	1976	742.43	NA	1975-09-30	NA	NA	7098.18
Acronicta_alni	Piesendorf: Walchen, Gasteg â€˘ PG-1900	1985-07-01	1985	911.81	NA	2016-02-01	NA	NA	3149.17
Acronicta_alni	Uttendorf: Stubachtal, Wirtenbach-MĂĽndung â€˘ GE-0001	1952-07-01	1952	806.34	NA	2018-12-31	NA	NA	5362.2
Acronicta_alni	Muhr: Pfeifenberger â€˘ PG-0090	2003-07-01	2003	1194.51	NA	1984-01-01	NA	NA	7016.32
Acronicta_alni	Saalbach-Hinterglemm: Hinterglemm / hinteres Glemmtal (ungenau) â€˘ PG-0067	1971-07-01	1971	1320.96	NA	2018-12-31	NA	NA	12239.6
Acronicta_alni	Salzburg Stadt: Gaisberg, Gipfel â€˘ PG-0202	1971-07-01	1971	1272.08	NA	2015-03-17	NA	NA	5407.59
Acronicta_alni	Abtenau: Einberg â€˘ POE-0006	2011-07-01	2011	1149.2	NA	2005-02-22	NA	NA	6598.45
Acronicta_alni	Koppl: Observation-Fundort â€˘ 13,09359/47,81717	2022-07-01	2022	567.571	NA	2015-03-17	NA	NA	4859.72
Acronicta_alni	GroĂźgmain: KĂĽhbach-Tal, Veitlbruch â€˘ PG-0221	1980-07-01	1980	632.422	NA	2003-09-19	NA	NA	1829.15
Acronicta_alni	GroĂźgmain: KĂĽhbach-Tal, Veitlbruch â€˘ PG-0221	1976-07-01	1976	632.422	NA	2003-09-19	NA	NA	1829.15
Acronicta_alni	Koppl: Winkl, "Spechtenschmiede" â€˘ W â€˘ PG-0909	1978-07-01	1978	742.43	NA	1975-09-30	NA	NA	7098.18
Acronicta_alni	Koppl: Winkl, "Spechtenschmiede" â€˘ W â€˘ PG-0909	1974-07-01	1974	742.43	NA	1975-09-30	NA	NA	7098.18
Acronicta_alni	Uttendorf: Stubachtal, Wirtenbach-MĂĽndung â€˘ GE-0001	1952-07-01	1952	806.34	NA	2018-12-31	NA	NA	5362.2
Acronicta_alni	Piesendorf: Walchen â€˘ GE-0013	1977-07-01	1977	861.48	NA	2016-02-01	NA	NA	3261.59
Acronicta_alni	Koppl (ungenau) â€˘ PG-0691	1962-07-01	1962	749.22	NA	1975-09-30	NA	NA	6594.28
Acronicta_alni	WeiĂźbach bei Lofer (ungenau) â€˘ PG-0320	1976-07-01	1976	664.86	NA	1983-12-15	NA	NA	5089.17
Acronicta_alni	St. Gilgen: FĂĽrberg, Falkenstein-Weg, "Scheffelblick" â€˘ PG-1325	2009-07-01	2009	693.45	NA	1973-07-27	NA	NA	5170.46
Acronicta_alni	St. Gilgen: FĂĽrberg, Falkenstein-Weg, "Scheffelblick" â€˘ PG-1325	2005-07-01	2005	693.45	NA	1973-07-27	NA	NA	5170.46
Acronicta_alni	Pfarrwerfen Ortsgebiet â€˘ PG-0180	1960-07-01	1960	535.08	NA	1982-02-16	NA	NA	3573.97
Acronicta_alni	Uttendorf: Stubachtal, Schneiderau, "BĂ¶ndlau" â€˘ GE-0058	1948-07-01	1948	1194.05	NA	1984-01-01	NA	NA	850.975
Acronicta_alni	Thomatal Ortsgebiet â€˘ GE-0017	1974-07-01	1974	1053.14	NA	2015-03-17	NA	NA	4289.69
Acronicta_alni	Uttendorf: Stubachtal, Schneiderau, "BĂ¶ndlau" â€˘ GE-0058	1951-07-01	1951	1194.05	NA	1984-01-01	NA	NA	850.975
Acronicta_alni	Uttendorf: Stubachtal, Schneiderau, "BĂ¶ndlau" â€˘ GE-0058	1951-07-01	1951	1194.05	NA	1984-01-01	NA	NA	850.975
Acronicta_alni	Thomatal Ortsgebiet â€˘ GE-0017	1975-07-01	1975	1053.14	NA	2015-03-17	NA	NA	4289.69
Acronicta_alni	Thomatal Ortsgebiet â€˘ GE-0017	1975-07-01	1975	1053.14	NA	2015-03-17	NA	NA	4289.69
Acronicta_alni	Thomatal Ortsgebiet â€˘ GE-0017	1975-07-01	1975	1053.14	NA	2015-03-17	NA	NA	4289.69
Acronicta_alni	Thomatal Ortsgebiet â€˘ GE-0017	1976-07-01	1976	1053.14	NA	2015-03-17	NA	NA	4289.69
Acronicta_alni	Muhr: Pfeifenberger â€˘ PG-0090	2004-07-01	2004	1194.51	NA	1984-01-01	NA	NA	7016.32
Acronicta_alni	Saalbach-Hinterglemm: Hinterglemm / hinteres Glemmtal (ungenau) â€˘ PG-0067	1968-07-01	1968	1320.96	NA	2018-12-31	NA	NA	12239.6
Acronicta_alni	Muhr: Pfeifenberger â€˘ PG-0090	1973-07-01	1973	1194.51	NA	1984-01-01	NA	NA	7016.32
Acronicta_alni	Muhr: Pfeifenberger â€˘ PG-0090	1973-07-01	1973	1194.51	NA	1984-01-01	NA	NA	7016.32
Acronicta_alni	Bad Hofgastein: Angertal â€˘ PG-0271	1997-07-01	1997	1185.1	NA	1984-01-01	NA	NA	6614.49
Acronicta_alni	Saalbach-Hinterglemm: Hinterglemm / hinteres Glemmtal (ungenau) â€˘ PG-0067	1972-07-01	1972	1320.96	NA	2018-12-31	NA	NA	12239.6
Acronicta_alni	Maria Alm/Steinernen Meer: Natrun, Wh. Natrun â€˘ SE â€˘ PG-3119	2017-07-01	2017	1096.35	NA	1983-12-15	NA	NA	4243.48
Acronicta_alni	Faistenau: Tiefbrunnau, KĂĽhleiten / "KĂĽhleitenalm" â€˘ GE-0018	1975-07-01	1975	909.45	NA	2016-02-01	NA	NA	7570.21
Acronicta_alni	Wagrain Ortsgebiet â€˘ GE-0026	1973-07-01	1973	840.6	NA	1990-04-27	NA	NA	9439.13
Acronicta_alni	Piesendorf: Walchen, Gasteg â€˘ PG-1900	1977-07-01	1977	911.81	NA	2016-02-01	NA	NA	3149.17
Acronicta_alni	Leogang: Hst. Leogang â€˘ PG-0410	1962-07-01	1962	825.73	NA	1983-12-15	NA	NA	8095.5
Acronicta_alni	Uttendorf: Stubachtal, Wirtenbach-MĂĽndung â€˘ GE-0001	1953-07-01	1953	806.34	NA	2018-12-31	NA	NA	5362.2
Acronicta_alni	Uttendorf: Stubachtal, Wirtenbach-MĂĽndung â€˘ GE-0001	1953-07-01	1953	806.34	NA	2018-12-31	NA	NA	5362.2
Acronicta_alni	Taxenbach: Eschenau â€˘ PG-0939	1974-07-01	1974	948.43	NA	2005-02-22	NA	NA	6867.25
Acronicta_alni	Uttendorf: Stubachtal, Wirtenbach-MĂĽndung â€˘ GE-0001	1953-07-01	1953	806.34	NA	2018-12-31	NA	NA	5362.2
Acronicta_alni	Thomatal Ortsgebiet â€˘ GE-0017	1974-07-01	1974	1053.14	NA	2015-03-17	NA	NA	4289.69
Acronicta_alni	Werfen: Eisriesenwelt (Aufstieg) â€˘ POE-0012	2011-07-01	2011	904.18	NA	1982-02-16	NA	NA	28.0709
Acronicta_alni	Thomatal Ortsgebiet â€˘ GE-0017	1974-07-01	1974	1053.14	NA	2015-03-17	NA	NA	4289.69
Acronicta_alni	Thomatal Ortsgebiet â€˘ GE-0017	1974-07-01	1974	1053.14	NA	2015-03-17	NA	NA	4289.69
Acronicta_alni	Wald im Pinzgau: Observation-Fundort â€˘ 12,22573/47,24824	2019-07-01	2019	890.96	NA	1984-01-01	NA	NA	2151.63
Acronicta_alni	MĂĽhlbach am HochkĂ¶nig Ortsgebiet â€˘ PG-0277	1967-07-01	1967	837.71	NA	1983-12-15	NA	NA	3746.93
Acronicta_alni	Rauris: WĂ¶rth â€˘ PG-0025	1963-07-01	1963	958.6	NA	1984-01-01	NA	NA	606.919
Acronicta_alni	Rauris: WĂ¶rth â€˘ PG-0025	1959-07-01	1959	958.6	NA	1984-01-01	NA	NA	606.919
Acronicta_alni	St. Gilgen: Kienberg, Mondsee-Ufer bei Scharfling (St. Lorenz, OĂ–) â€˘ GE-0025	2010-07-01	2010	481.93	NA	1973-07-27	NA	NA	8928.64
Acronicta_alni	Hallwang: SĂ¶llheim â€˘ PG-0338	1955-07-01	1955	455.046	NA	1980-01-25	NA	NA	5036.4
Acronicta_alni	Puch bei Hallein Ortsgebiet â€˘ PG-1650	1976-07-01	1976	439.942	NA	2002-12-03	NA	NA	6589.22
Acronicta_alni	Salzburg Stadt: MĂ¶nchsberg â€˘ PG-0658	1951-07-01	1951	431.537	NA	2015-03-17	NA	NA	878.234
Acronicta_alni	GrĂ¶dig: GrĂ¶dig > Glanegg â€˘ PG-0718	1970-07-01	1970	441.71	NA	2015-03-17	NA	NA	1751.03
Acronicta_alni	Puch bei Hallein Ortsgebiet â€˘ PG-1650	1976-07-01	1976	439.942	NA	2002-12-03	NA	NA	6589.22
Acronicta_alni	Pfarrwerfen Ortsgebiet â€˘ PG-0180	1962-07-01	1962	535.08	NA	1982-02-16	NA	NA	3573.97
Acronicta_alni	Pfarrwerfen Ortsgebiet â€˘ PG-0180	1959-07-01	1959	535.08	NA	1982-02-16	NA	NA	3573.97
Acronicta_alni	Salzburg Stadt (ungenau) â€˘ 410-435 m â€˘ PG-0346	1952-07-01	1952	423.869	NA	2015-03-17	NA	NA	866.906
Acronicta_alni	Salzburg Stadt (ungenau) â€˘ 410-435 m â€˘ PG-0346	1937-07-01	1937	423.869	NA	2015-03-17	NA	NA	866.906
Acronicta_alni	Salzburg Stadt (ungenau) â€˘ 410-435 m â€˘ PG-0346	1952-07-01	1952	423.869	NA	2015-03-17	NA	NA	866.906
Acronicta_alni	Salzburg Stadt (ungenau) â€˘ 410-435 m â€˘ PG-0346	1952-07-01	1952	423.869	NA	2015-03-17	NA	NA	866.906
Acronicta_alni	Muhr: Pfeifenberger â€˘ PG-0090	1976-07-01	1976	1194.51	NA	1984-01-01	NA	NA	7016.32
Acronicta_alni	Muhr: Pfeifenberger â€˘ PG-0090	1975-07-01	1975	1194.51	NA	1984-01-01	NA	NA	7016.32
Acronicta_alni	Salzburg Stadt: Aigen, Parsch â€˘ PG-0208	1959-07-01	1959	432.161	NA	2015-03-17	NA	NA	2878
Acronicta_alni	Salzburg Stadt: Aigen, Parsch â€˘ PG-0208	1957-07-01	1957	432.161	NA	2015-03-17	NA	NA	2878
Acronicta_alni	Salzburg Stadt: MĂ¶nchsberg â€˘ PG-0658	1933-07-01	1933	431.537	NA	2015-03-17	NA	NA	878.234
Acronicta_alni	Salzburg Stadt: Aigen, Parsch â€˘ PG-0208	1961-07-01	1961	432.161	NA	2015-03-17	NA	NA	2878
Acronicta_alni	Salzburg Stadt: Aigen, Parsch â€˘ PG-0208	1957-07-01	1957	432.161	NA	2015-03-17	NA	NA	2878
Acronicta_alni	GroĂźgmain: KĂĽhbach-Tal, Veitlbruch â€˘ PG-0221	1987-07-01	1987	632.422	NA	2003-09-19	NA	NA	1829.15
Acronicta_alni	GroĂźgmain: KĂĽhbach-Tal, Veitlbruch â€˘ PG-0221	1986-07-01	1986	632.422	NA	2003-09-19	NA	NA	1829.15
Acronicta_alni	Saalfelden am Steinernen Meer: Hohlwegen, StoĂźwand â€˘ FuĂź â€˘ PG-2691	2013-07-01	2013	689.18	NA	1983-12-15	NA	NA	174.537
Acronicta_alni	Salzburg Stadt: Gaisberg, Judenberg â€˘ PG-0934	1959-07-01	1959	728.354	NA	2015-03-17	NA	NA	4387.31
Acronicta_alni	Ebenau: Hinterwinkl, WeiĂźbach-Tal, Taleingang â€˘ PG-0292	1974-07-01	1974	588.94	NA	1975-09-30	NA	NA	6983.53
Acronicta_alni	Ebenau: Hinterwinkl, WeiĂźbach-Tal, Taleingang â€˘ PG-0292	1974-07-01	1974	588.94	NA	1975-09-30	NA	NA	6983.53
Acronicta_alni	Ebenau: Hinterwinkl, WeiĂźbach-Tal, Taleingang â€˘ PG-0292	1974-07-01	1974	588.94	NA	1975-09-30	NA	NA	6983.53
Acronicta_alni	Ebenau: Hinterwinkl, WeiĂźbach-Tal, Taleingang â€˘ PG-0292	1974-07-01	1974	588.94	NA	1975-09-30	NA	NA	6983.53
Acronicta_alni	Wagrain Ortsgebiet â€˘ GE-0026	1974-07-01	1974	840.6	NA	1990-04-27	NA	NA	9439.13
Acronicta_alni	Uttendorf: Stubachtal, Wirtenbach-MĂĽndung â€˘ GE-0001	1952-07-01	1952	806.34	NA	2018-12-31	NA	NA	5362.2
Acronicta_alni	Uttendorf: Stubachtal, Schneiderau â€˘ PG-0219	1967-07-01	1967	1006.22	NA	1984-01-01	NA	NA	1399.67
Acronicta_alni	Maria Alm am Steinernem Meer: Natrun â€˘ GE-0172	2016-07-01	2016	1247.34	NA	1983-12-15	NA	NA	4181.47
Acronicta_alni	Koppl: Winkl, "Spechtenschmiede" â€˘ W â€˘ PG-0909	1975-07-01	1975	742.43	NA	1975-09-30	NA	NA	7098.18
Acronicta_alni	Koppl: Winkl, "Spechtenschmiede" â€˘ W â€˘ PG-0909	1974-07-01	1974	742.43	NA	1975-09-30	NA	NA	7098.18
Acronicta_alni	Uttendorf: Stubachtal, Wirtenbach-MĂĽndung â€˘ GE-0001	1952-07-01	1952	806.34	NA	2018-12-31	NA	NA	5362.2
Acronicta_alni	Kaprun: Filzmoos â€˘ PG-1280	1992-07-01	1992	756.22	NA	1972-12-28	NA	NA	2534.41
Acronicta_alni	Werfen: Ghf. Stegenwald, GrĂĽnwaldrinne-Aufstieg (Tennengebirge) â€˘ PG-0754	1953-07-01	1953	544.27	NA	1982-02-16	NA	NA	339.278
Acronicta_alni	Lofer Ortsgebiet â€˘ PG-0575	1937-07-01	1937	624.66	NA	2018-12-31	NA	NA	4768.77
Acronicta_alni	Kaprun: Kapruner Achental, LĂ¤rchwand â€˘ GE-0002	1965-07-01	1965	1539.5	NA	1984-01-01	NA	NA	1277.37
Acronicta_alni	MĂĽhlbach am HochkĂ¶nig: Mitterberg, Mitterbergalm â€˘ Berghof â€˘ PG-2544	2010-07-01	2010	1423.77	NA	1983-12-15	NA	NA	512.281
Acronicta_alni	Bad Hofgastein: SchloĂźalm-Gebiet â€˘ PG-0027	1958-07-01	1958	2107.95	NA	1984-01-01	NA	NA	6304.4
Acronicta_alni	Zederhaus: Riedingtal (ungenau) â€˘ Hinteres Riedingtal â€˘ PG-0184	1969-07-01	1969	1822.32	NA	2016-02-01	NA	NA	971.143
Acronicta_alni	Muhr: Pfeifenberger â€˘ PG-0090	1974-07-01	1974	1194.51	NA	1984-01-01	NA	NA	7016.32
Acronicta_alni	Muhr: Pfeifenberger â€˘ PG-0090	2005-07-01	2005	1194.51	NA	1984-01-01	NA	NA	7016.32
Acronicta_alni	MĂĽhlbach am HochkĂ¶nig: Trockenbach-Tal, Stegmoosalm â€˘ PG-0175	2004-07-01	2004	1445.32	NA	1983-12-15	NA	NA	419.201
Acronicta_alni	Muhr: Pfeifenberger â€˘ PG-0090	1992-07-01	1992	1194.51	NA	1984-01-01	NA	NA	7016.32
Acronicta_alni	Salzburg Stadt: MĂ¶nchsberg â€˘ PG-0658	1951-07-01	1951	431.537	NA	2015-03-17	NA	NA	878.234
Acronicta_alni	Bad Gastein: Observation-Fundort â€˘ 13,1313/47,13562	2022-07-01	2022	852.98	NA	1984-01-01	NA	NA	3119.12
Acronicta_alni	Bischofshofen: MĂĽhlbach-Tal, Haidberg â€˘ PG-0606	1997-07-01	1997	961.86	NA	1983-12-15	NA	NA	4127.99
Acronicta_alni	Bad Hofgastein: SchloĂźalm-Gebiet â€˘ PG-0027	1961-07-01	1961	2107.95	NA	1984-01-01	NA	NA	6304.4
Acronicta_alni	Salzburg Stadt: Leopoldskron-Moos, Leopoldskroner Weiher â€˘ GE-0023	1984-07-01	1984	430.626	NA	2015-03-17	NA	NA	51.6804
Acronicta_alni	Thomatal Ortsgebiet â€˘ GE-0017	1974-07-01	1974	1053.14	NA	2015-03-17	NA	NA	4289.69
Acronicta_alni	Thomatal Ortsgebiet â€˘ GE-0017	1974-07-01	1974	1053.14	NA	2015-03-17	NA	NA	4289.69
Acronicta_alni	Thomatal Ortsgebiet â€˘ GE-0017	1975-07-01	1975	1053.14	NA	2015-03-17	NA	NA	4289.69
Acronicta_alni	Thomatal Ortsgebiet â€˘ GE-0017	1975-07-01	1975	1053.14	NA	2015-03-17	NA	NA	4289.69
Acronicta_alni	Uttendorf: Stubachtal, Schneiderau â€˘ PG-0219	1973-07-01	1973	1006.22	NA	1984-01-01	NA	NA	1399.67
Acronicta_alni	Uttendorf: Stubachtal, Schneiderau â€˘ PG-0219	1972-07-01	1972	1006.22	NA	1984-01-01	NA	NA	1399.67
Acronicta_alni	Thomatal Ortsgebiet â€˘ GE-0017	1974-07-01	1974	1053.14	NA	2015-03-17	NA	NA	4289.69
Acronicta_alni	Adnet: Spumberg, Wh. Zillreit â€˘ GE-0004	1980-07-01	1980	1117.55	NA	2007-11-06	NA	NA	4016.04
Acronicta_alni	Saalbach-Hinterglemm: Hinterglemm / hinteres Glemmtal (ungenau) â€˘ PG-0067	1968-07-01	1968	1320.96	NA	2018-12-31	NA	NA	12239.6
Acronicta_alni	Saalbach-Hinterglemm: Hinterglemm / hinteres Glemmtal (ungenau) â€˘ PG-0067	1973-07-01	1973	1320.96	NA	2018-12-31	NA	NA	12239.6
Acronicta_alni	Muhr: Pfeifenberger â€˘ PG-0090	2004-07-01	2004	1194.51	NA	1984-01-01	NA	NA	7016.32
Acronicta_alni	Saalbach-Hinterglemm: Hinterglemm / hinteres Glemmtal (ungenau) â€˘ PG-0067	1968-07-01	1968	1320.96	NA	2018-12-31	NA	NA	12239.6
Acronicta_alni	Thomatal Ortsgebiet â€˘ GE-0017	1975-07-01	1975	1053.14	NA	2015-03-17	NA	NA	4289.69
Acronicta_alni	Thomatal Ortsgebiet â€˘ GE-0017	1975-07-01	1975	1053.14	NA	2015-03-17	NA	NA	4289.69
Acronicta_alni	Maria Alm/Steinernen Meer: Natrun, Wh. Natrun â€˘ SE â€˘ PG-3119	2016-07-01	2016	1096.35	NA	1983-12-15	NA	NA	4243.48
Acronicta_alni	Muhr Ortsgebiet â€˘ PG-0580	1963-07-01	1963	1129.38	NA	1984-01-01	NA	NA	7311.58
Acronicta_alni	St. Koloman: Trattberg-Gebiet â€˘ PG-0608	1978-07-01	1978	1742.41	NA	2005-02-22	NA	NA	6422.99
Acronicta_alni	Muhr: Pfeifenberger â€˘ PG-0090	1984-07-01	1984	1194.51	NA	1984-01-01	NA	NA	7016.32
Acronicta_alni	Ramingstein: KlĂ¶lingbach-Tal, Karneralm â€˘ PG-0116	1975-07-01	1975	1892.39	NA	1983-02-23	NA	NA	2990.63
Acronicta_alni	St. Koloman: Trattberg-Gebiet, Vordertrattbergalm â€˘ PG-0815	1978-07-01	1978	1465.17	NA	2005-02-22	NA	NA	7235.57
Acronicta_alni	Tamsweg: Observation-Fundort â€˘ 13,87932/47,13862	2022-07-01	2022	1141.5	NA	2002-12-03	NA	NA	3095.59
Acronicta_alni	Thomatal Ortsgebiet â€˘ GE-0017	1975-07-01	1975	1053.14	NA	2015-03-17	NA	NA	4289.69
Acronicta_alni	Muhr: Pfeifenberger â€˘ PG-0090	1972-07-01	1972	1194.51	NA	1984-01-01	NA	NA	7016.32
Acronicta_alni	Muhr: Pfeifenberger â€˘ PG-0090	2003-07-01	2003	1194.51	NA	1984-01-01	NA	NA	7016.32
Acronicta_alni	Salzburg Stadt: Leopoldskron-Moos, Leopoldskroner Weiher â€˘ GE-0023	1983-07-01	1983	430.626	NA	2015-03-17	NA	NA	51.6804
Acronicta_alni	Oberndorf bei Salzburg: Stadtgebiet â€˘ GE-0166	1963-07-01	1963	401.06	NA	2002-12-03	NA	NA	69.9502
Acronicta_alni	Hallwang: SĂ¶llheim â€˘ PG-0338	1966-07-01	1966	455.046	NA	1980-01-25	NA	NA	5036.4
Acronicta_alni	Anif: Salzach-Au â€˘ PG-1418	1982-07-01	1982	431.019	NA	2015-03-17	NA	NA	3725.22
Acronicta_alni	Salzburg Stadt: Aigen, Parsch â€˘ PG-0208	1960-07-01	1960	432.161	NA	2015-03-17	NA	NA	2878
Acronicta_alni	Salzburg Stadt: Innere Stadt, Steingasse 63 â€˘ PG-2109	1975-07-01	1975	421.093	NA	2015-03-17	NA	NA	1308.28
Acronicta_alni	Salzburg Stadt: MĂ¶nchsberg â€˘ PG-0658	1952-07-01	1952	431.537	NA	2015-03-17	NA	NA	878.234
Acronicta_alni	Salzburg Stadt: Aigen, Parsch â€˘ PG-0208	1956-07-01	1956	432.161	NA	2015-03-17	NA	NA	2878
Acronicta_alni	Salzburg Stadt: Aigen, Parsch â€˘ PG-0208	1959-07-01	1959	432.161	NA	2015-03-17	NA	NA	2878
Acronicta_alni	Salzburg Stadt: Aigen, Parsch â€˘ PG-0208	1958-07-01	1958	432.161	NA	2015-03-17	NA	NA	2878
Acronicta_auricoma	Kleinarl: Tappenkar-Gebiet, Tappenkar â€˘ GE-0042	1938-07-01	1938	1821.82	NA	2016-02-01	NA	NA	3033.74
Acronicta_auricoma	Hallwang Ortsgebiet â€˘ PG-0330	1946-07-01	1946	509.733	NA	1980-01-25	NA	NA	3857.03
Acronicta_auricoma	Thalgau Ortsgebiet â€˘ PG-0347	1946-07-01	1946	544.737	NA	1975-09-30	NA	NA	2340.76
Acronicta_auricoma	Thalgau Ortsgebiet â€˘ PG-0347	1938-07-01	1938	544.737	NA	1975-09-30	NA	NA	2340.76
Acronicta_auricoma	Salzburg Stadt: Aigen, Parsch â€˘ PG-0208	1958-07-01	1958	432.161	NA	2015-03-17	NA	NA	2878
Acronicta_auricoma	Salzburg Stadt: Aigen, Parsch â€˘ PG-0208	1958-07-01	1958	432.161	NA	2015-03-17	NA	NA	2878
Acronicta_auricoma	Hallwang: SĂ¶llheim â€˘ PG-0338	1938-07-01	1938	455.046	NA	1980-01-25	NA	NA	5036.4
Acronicta_auricoma	Hallwang: SĂ¶llheim â€˘ PG-0338	1956-07-01	1956	455.046	NA	1980-01-25	NA	NA	5036.4
Acronicta_auricoma	Salzburg Stadt (ungenau) â€˘ 410-435 m â€˘ PG-0346	1941-07-01	1941	423.869	NA	2015-03-17	NA	NA	866.906
Acronicta_auricoma	Salzburg Stadt: Aigen, Parsch â€˘ PG-0208	1956-07-01	1956	432.161	NA	2015-03-17	NA	NA	2878
Acronicta_auricoma	Hallwang: SĂ¶llheim â€˘ PG-0338	1957-07-01	1957	455.046	NA	1980-01-25	NA	NA	5036.4
Acronicta_auricoma	Wals-Siezenheim: Viehhausen â€˘ PG-0340	1976-07-01	1976	436.084	NA	1976-10-29	NA	NA	1934.29
Acronicta_auricoma	St. Georgen bei Salzburg: Roding â€˘ PG-0679	1974-07-01	1974	446.205	NA	2002-12-03	NA	NA	1009.66
Acronicta_auricoma	Salzburg Stadt (ungenau) â€˘ 410-435 m â€˘ PG-0346	1934-07-01	1934	423.869	NA	2015-03-17	NA	NA	866.906
Acronicta_auricoma	Salzburg Stadt: Aigen, Parsch â€˘ PG-0208	1959-07-01	1959	432.161	NA	2015-03-17	NA	NA	2878
Acronicta_auricoma	Salzburg Stadt: Aigen, Parsch â€˘ PG-0208	1957-07-01	1957	432.161	NA	2015-03-17	NA	NA	2878
Acronicta_auricoma	Muhr: Pfeifenberger â€˘ PG-0090	1975-07-01	1975	1194.51	NA	1984-01-01	NA	NA	7016.32
Acronicta_auricoma	Muhr: Pfeifenberger â€˘ PG-0090	1979-07-01	1979	1194.51	NA	1984-01-01	NA	NA	7016.32
Acronicta_auricoma	Muhr: Pfeifenberger â€˘ PG-0090	1974-07-01	1974	1194.51	NA	1984-01-01	NA	NA	7016.32
Acronicta_auricoma	Muhr: Pfeifenberger â€˘ PG-0090	1975-07-01	1975	1194.51	NA	1984-01-01	NA	NA	7016.32
Acronicta_auricoma	Muhr: Pfeifenberger â€˘ PG-0090	1992-07-01	1992	1194.51	NA	1984-01-01	NA	NA	7016.32
Acronicta_auricoma	Hallwang Ortsgebiet â€˘ PG-0330	1945-07-01	1945	509.733	NA	1980-01-25	NA	NA	3857.03
Acronicta_auricoma	Hallein: Rif â€˘ GE-0191	1960-07-01	1960	434.276	NA	2015-03-17	NA	NA	4967.98
Acronicta_auricoma	Neumarkt am Wallersee Ortsgebiet â€˘ PG-0207	1977-07-01	1977	543.551	NA	2002-12-03	NA	NA	1670.66
Acronicta_auricoma	Eugendorf Ortsgebiet â€˘ PG-0200	1940-07-01	1940	556.879	NA	1973-10-01	NA	NA	3888.41
Acronicta_auricoma	Bergheim: Plainberg â€˘ PG-0337	1948-07-01	1948	501.429	NA	2002-12-03	NA	NA	4519.79
Acronicta_auricoma	Hallwang Ortsgebiet â€˘ PG-0330	1945-07-01	1945	509.733	NA	1980-01-25	NA	NA	3857.03
Acronicta_auricoma	MĂĽhlbach am HochkĂ¶nig Ortsgebiet â€˘ PG-0277	1972-07-01	1972	837.71	NA	1983-12-15	NA	NA	3746.93
Acronicta_auricoma	Koppl: Winkl, "Spechtenschmiede" â€˘ W â€˘ PG-0909	1985-07-01	1985	742.43	NA	1975-09-30	NA	NA	7098.18
Acronicta_auricoma	Saalbach-Hinterglemm: Hinterglemm / hinteres Glemmtal (ungenau) â€˘ PG-0067	1973-07-01	1973	1320.96	NA	2018-12-31	NA	NA	12239.6
Acronicta_auricoma	Saalbach-Hinterglemm: Hinterglemm / hinteres Glemmtal (ungenau) â€˘ PG-0067	1973-07-01	1973	1320.96	NA	2018-12-31	NA	NA	12239.6
Acronicta_auricoma	Eugendorf Ortsgebiet â€˘ PG-0200	1938-07-01	1938	556.879	NA	1973-10-01	NA	NA	3888.41
Acronicta_auricoma	Eugendorf Ortsgebiet â€˘ PG-0200	1939-07-01	1939	556.879	NA	1973-10-01	NA	NA	3888.41
Acronicta_auricoma	Abtenau Ortsgebiet â€˘ PG-0354	1930-07-01	1930	714.61	NA	1982-02-16	NA	NA	2658.48
Acronicta_auricoma	Eugendorf Ortsgebiet â€˘ PG-0200	1941-07-01	1941	556.879	NA	1973-10-01	NA	NA	3888.41
Acronicta_auricoma	Untertauern: Obertauern â€˘ PG-0112	1968-07-01	1968	1740.04	NA	2002-12-03	NA	NA	321.518
Acronicta_auricoma	Saalbach-Hinterglemm: Lohbach-Tal, Turneralm â€˘ GE-0027	2002-07-01	2002	1398.69	NA	2016-02-01	NA	NA	13823.3
Acronicta_auricoma	Bad Hofgastein: SchloĂźalm-Gebiet â€˘ PG-0027	1960-07-01	1960	2107.95	NA	1984-01-01	NA	NA	6304.4
Acronicta_auricoma	Bad Hofgastein: SchloĂźalm-Gebiet â€˘ PG-0027	1960-07-01	1960	2107.95	NA	1984-01-01	NA	NA	6304.4
Acronicta_auricoma	Vigaun: Schlenken â€˘ PG-0259	1976-07-01	1976	1564.83	NA	2007-11-06	NA	NA	4733.4
Acronicta_auricoma	Muhr: Pfeifenberger â€˘ PG-0090	1975-07-01	1975	1194.51	NA	1984-01-01	NA	NA	7016.32
Acronicta_auricoma	Salzburg Stadt: Liefering, Salzachseen â€˘ NW (Saalachspitz) â€˘ PG-0510	1957-07-01	1957	409.823	NA	2002-12-03	NA	NA	3312.76
Acronicta_auricoma	Bad Hofgastein: SchloĂźalm-Gebiet â€˘ PG-0027	1959-07-01	1959	2107.95	NA	1984-01-01	NA	NA	6304.4
Acronicta_auricoma	Bad Hofgastein: SchloĂźalm-Gebiet â€˘ PG-0027	1961-07-01	1961	2107.95	NA	1984-01-01	NA	NA	6304.4
Acronicta_auricoma	Rauris: WĂ¶rth â€˘ PG-0025	1963-07-01	1963	958.6	NA	1984-01-01	NA	NA	606.919
Acronicta_auricoma	Rauris: WĂ¶rth â€˘ PG-0025	1959-07-01	1959	958.6	NA	1984-01-01	NA	NA	606.919
Acronicta_auricoma	Uttendorf: Stubachtal, Schneiderau â€˘ PG-0219	1947-07-01	1947	1006.22	NA	1984-01-01	NA	NA	1399.67
Acronicta_auricoma	Uttendorf: Stubachtal, Schneiderau, Fellern â€˘ PG-0390	1948-07-01	1948	987.32	NA	1984-01-01	NA	NA	2032.86
Acronicta_auricoma	Schwarzach im Pongau Ortsgebiet â€˘ PG-0633	1960-07-01	1960	595.33	NA	1990-04-27	NA	NA	3088.82
Acronicta_auricoma	Faistenau: Tiefbrunnau, KĂĽhleiten / "KĂĽhleitenalm" â€˘ GE-0018	1975-07-01	1975	909.45	NA	2016-02-01	NA	NA	7570.21
Acronicta_auricoma	Koppl: Winkl, "Spechtenschmiede" â€˘ W â€˘ PG-0909	1976-07-01	1976	742.43	NA	1975-09-30	NA	NA	7098.18
Acronicta_auricoma	Muhr: Pfeifenberger â€˘ PG-0090	1976-07-01	1976	1194.51	NA	1984-01-01	NA	NA	7016.32
Acronicta_auricoma	Muhr: Pfeifenberger â€˘ PG-0090	1976-07-01	1976	1194.51	NA	1984-01-01	NA	NA	7016.32
Acronicta_auricoma	Muhr: Pfeifenberger â€˘ PG-0090	1973-07-01	1973	1194.51	NA	1984-01-01	NA	NA	7016.32
Acronicta_auricoma	Muhr: Pfeifenberger â€˘ PG-0090	1973-07-01	1973	1194.51	NA	1984-01-01	NA	NA	7016.32
Acronicta_auricoma	Uttendorf: Stubachtal, Schneiderau, "BĂ¶ndlau" â€˘ GE-0058	1948-07-01	1948	1194.05	NA	1984-01-01	NA	NA	850.975
Acronicta_auricoma	Thomatal Ortsgebiet â€˘ PG-0179	1973-07-01	1973	1044.42	NA	2015-03-17	NA	NA	4175.81
Acronicta_auricoma	Muhr: Pfeifenberger â€˘ PG-0090	1976-07-01	1976	1194.51	NA	1984-01-01	NA	NA	7016.32
Acronicta_auricoma	Strobl: Observation-Fundort â€˘ 13,51277/47,68831	2022-07-01	2022	1141.84	NA	1973-07-27	NA	NA	4165.47
Acronicta_auricoma	Neumarkt am Wallersee Ortsgebiet â€˘ PG-0207	1979-07-01	1979	543.551	NA	2002-12-03	NA	NA	1670.66
Acronicta_auricoma	Neumarkt am Wallersee Ortsgebiet â€˘ PG-0207	1979-07-01	1979	543.551	NA	2002-12-03	NA	NA	1670.66
Acronicta_auricoma	StraĂźwalchen: Steindorf â€˘ GE-0010	1962-07-01	1962	545.605	NA	2002-12-03	NA	NA	3990.7
Acronicta_auricoma	Pfarrwerfen Ortsgebiet â€˘ PG-0180	1962-07-01	1962	535.08	NA	1982-02-16	NA	NA	3573.97
Acronicta_auricoma	Wals-Siezenheim: Viehhausen, Schweizersiedlung, "Laschensky" â€˘ PG-0005	1950-07-01	1950	433.311	NA	1976-10-29	NA	NA	1220.15
Acronicta_auricoma	Salzburg Stadt: Leopoldskron-Moos, Moor W Gneis / "Gneiser Moor" â€˘ GE-0005	1974-07-01	1974	435.996	NA	2015-03-17	NA	NA	384.555
Acronicta_auricoma	Hallwang: SĂ¶llheim â€˘ PG-0338	1958-07-01	1958	455.046	NA	1980-01-25	NA	NA	5036.4
Acronicta_auricoma	Wals-Siezenheim: Viehhausen, Schweizersiedlung, "Laschensky" â€˘ PG-0005	1950-07-01	1950	433.311	NA	1976-10-29	NA	NA	1220.15
Acronicta_auricoma	Salzburg Stadt: Aigen, Parsch â€˘ PG-0208	1955-07-01	1955	432.161	NA	2015-03-17	NA	NA	2878
Acronicta_auricoma	Bergheim: Plainberg â€˘ PG-0337	1959-07-01	1959	501.429	NA	2002-12-03	NA	NA	4519.79
Acronicta_auricoma	Seekirchen am Wallersee Ortsgebiet â€˘ PG-0643	1970-07-01	1970	508.587	NA	1973-10-01	NA	NA	1377.44
Acronicta_auricoma	Hallwang Ortsgebiet â€˘ PG-0330	1942-07-01	1942	509.733	NA	1980-01-25	NA	NA	3857.03
Acronicta_auricoma	St. Georgen bei Salzburg: Roding â€˘ PG-0679	1971-07-01	1971	446.205	NA	2002-12-03	NA	NA	1009.66
Acronicta_auricoma	Hallwang: SĂ¶llheim â€˘ PG-0338	1961-07-01	1961	455.046	NA	1980-01-25	NA	NA	5036.4
Acronicta_auricoma	Salzburg Stadt: Hallwang, Kasern â€˘ PG-0273	1941-07-01	1941	498.487	NA	2015-03-17	NA	NA	5051.82
Acronicta_auricoma	GrĂ¶dig: FĂĽrstenbrunn Ortsgebiet, Glanbach â€˘ PG-1298	1957-07-01	1957	462.307	NA	2018-12-31	NA	NA	77.9215
Acronicta_auricoma	MĂĽhlbach am HochkĂ¶nig: Dientner Sattel, Birgkarhaus â€˘ PG-0655	1954-07-01	1954	1368.35	NA	1983-12-15	NA	NA	558.792
Acronicta_auricoma	Muhr: Pfeifenberger â€˘ PG-0090	1992-07-01	1992	1194.51	NA	1984-01-01	NA	NA	7016.32
Acronicta_auricoma	Muhr: Pfeifenberger â€˘ PG-0090	1983-07-01	1983	1194.51	NA	1984-01-01	NA	NA	7016.32
Acronicta_auricoma	Rauris: HĂĽttwinkltal, Bodenhaus-Gebiet, Wh. Bodenhaus â€˘ PG-0374	1985-07-01	1985	1229.03	NA	1984-01-01	NA	NA	35.3237
Acronicta_auricoma	Muhr: Pfeifenberger â€˘ PG-0090	1974-07-01	1974	1194.51	NA	1984-01-01	NA	NA	7016.32
Acronicta_auricoma	Kleinarl: Tappenkar-Gebiet, Tappenkarsee â€˘ PG-0129	1954-07-01	1954	1762.46	NA	2016-02-01	NA	NA	4495.75
Acronicta_auricoma	Zederhaus: Riedingtal (ungenau) â€˘ Hinteres Riedingtal â€˘ PG-0184	1969-07-01	1969	1822.32	NA	2016-02-01	NA	NA	971.143
Acronicta_auricoma	Fusch an der GroĂźglocknerstraĂźe: Ferleitental, Trauneralm â€˘ PG-0083	1951-07-01	1951	1540.44	NA	1984-01-01	NA	NA	232.001
Acronicta_auricoma	Saalfelden am Steinernen Meer Ortsgebiet â€˘ PG-0281	1958-07-01	1958	740	NA	1983-12-15	NA	NA	3104.28
Acronicta_auricoma	Eugendorf Ortsgebiet â€˘ PG-0200	1942-07-01	1942	556.879	NA	1973-10-01	NA	NA	3888.41
Acronicta_auricoma	Hollersbach im Pinzgau (ungenau) â€˘ "Steinbruch" â€˘ GE-0089	1992-07-01	1992	821.95	NA	1984-01-01	NA	NA	2409.97
Acronicta_auricoma	Thalgau: Thalgauberg, Wasenmoos, Mooswirt NW â€˘ PG-0449	1959-07-01	1959	764.893	NA	1975-09-30	NA	NA	5643.8
Acronicta_auricoma	Neumarkt am Wallersee Ortsgebiet â€˘ PG-0207	1979-07-01	1979	543.551	NA	2002-12-03	NA	NA	1670.66
Acronicta_auricoma	Eugendorf Ortsgebiet â€˘ PG-0200	1932-07-01	1932	556.879	NA	1973-10-01	NA	NA	3888.41
Acronicta_auricoma	Eugendorf Ortsgebiet â€˘ PG-0200	1938-07-01	1938	556.879	NA	1973-10-01	NA	NA	3888.41
Acronicta_auricoma	Muhr: Pfeifenberger â€˘ PG-0090	2004-07-01	2004	1194.51	NA	1984-01-01	NA	NA	7016.32
Acronicta_auricoma	Muhr Ortsgebiet â€˘ PG-0580	1963-07-01	1963	1129.38	NA	1984-01-01	NA	NA	7311.58
Acronicta_auricoma	Muhr: Pfeifenberger â€˘ PG-0090	1976-07-01	1976	1194.51	NA	1984-01-01	NA	NA	7016.32
Acronicta_auricoma	Muhr: Pfeifenberger â€˘ PG-0090	1974-07-01	1974	1194.51	NA	1984-01-01	NA	NA	7016.32
Acronicta_auricoma	Rauris: WĂ¶rth â€˘ PG-0025	1963-07-01	1963	958.6	NA	1984-01-01	NA	NA	606.919
Acronicta_auricoma	Rauris: WĂ¶rth â€˘ PG-0025	1977-07-01	1977	958.6	NA	1984-01-01	NA	NA	606.919
Acronicta_auricoma	Thomatal Ortsgebiet â€˘ PG-0179	1976-07-01	1976	1044.42	NA	2015-03-17	NA	NA	4175.81
Acronicta_auricoma	Thomatal Ortsgebiet â€˘ PG-0179	1974-07-01	1974	1044.42	NA	2015-03-17	NA	NA	4175.81
Acronicta_auricoma	Salzburg Stadt: Hallwang, Kasern â€˘ PG-0273	1934-07-01	1934	498.487	NA	2015-03-17	NA	NA	5051.82
Acronicta_auricoma	Hallwang: SĂ¶llheim â€˘ PG-0338	1961-07-01	1961	455.046	NA	1980-01-25	NA	NA	5036.4
Acronicta_auricoma	Salzburg Stadt: Hallwang, Kasern â€˘ PG-0273	1945-07-01	1945	498.487	NA	2015-03-17	NA	NA	5051.82
Acronicta_auricoma	Salzburg Stadt: Aigen, Parsch â€˘ PG-0208	1957-07-01	1957	432.161	NA	2015-03-17	NA	NA	2878
Acronicta_auricoma	Salzburg Stadt: Aigen, Parsch â€˘ PG-0208	1954-07-01	1954	432.161	NA	2015-03-17	NA	NA	2878
Acronicta_auricoma	Salzburg Stadt: Aigen, Parsch â€˘ PG-0208	1962-07-01	1962	432.161	NA	2015-03-17	NA	NA	2878
Acronicta_auricoma	Salzburg Stadt: Aigen, Parsch â€˘ PG-0208	1957-07-01	1957	432.161	NA	2015-03-17	NA	NA	2878
Acronicta_auricoma	Bad Hofgastein: SchloĂźalm-Gebiet â€˘ PG-0027	1958-07-01	1958	2107.95	NA	1984-01-01	NA	NA	6304.4
Acronicta_auricoma	Bad Hofgastein: SchloĂźalm-Gebiet â€˘ PG-0027	1960-07-01	1960	2107.95	NA	1984-01-01	NA	NA	6304.4
Acronicta_auricoma	Rauris: GroĂźglocknerstraĂźe, MittertĂ¶rl â€˘ PG-0003	1995-07-01	1995	2260.57	NA	1984-01-01	NA	NA	68.7506
Acronicta_auricoma	Bad Hofgastein: SchloĂźalm-Gebiet â€˘ PG-0027	1989-07-01	1989	2107.95	NA	1984-01-01	NA	NA	6304.4
Acronicta_auricoma	Bad Hofgastein: SchloĂźalm-Gebiet â€˘ PG-0027	1960-07-01	1960	2107.95	NA	1984-01-01	NA	NA	6304.4
Acronicta_auricoma	Ramingstein: KlĂ¶lingbach-Tal, Karneralm â€˘ PG-0116	1965-07-01	1965	1892.39	NA	1983-02-23	NA	NA	2990.63
Acronicta_auricoma	Bad Hofgastein: SchloĂźalm-Gebiet â€˘ PG-0027	1960-07-01	1960	2107.95	NA	1984-01-01	NA	NA	6304.4
Acronicta_auricoma	Bad Hofgastein: SchloĂźalm-Gebiet â€˘ PG-0027	1960-07-01	1960	2107.95	NA	1984-01-01	NA	NA	6304.4
Acronicta_auricoma	Salzburg Stadt: Leopoldskron-Moos, Leopoldskroner Weiher â€˘ GE-0023	1986-07-01	1986	430.626	NA	2015-03-17	NA	NA	51.6804
Acronicta_auricoma	Salzburg Stadt: Leopoldskron-Moos, Leopoldskroner Weiher â€˘ GE-0023	1982-07-01	1982	430.626	NA	2015-03-17	NA	NA	51.6804
Acronicta_auricoma	Salzburg Stadt: Aigen, Parsch â€˘ PG-0208	1953-07-01	1953	432.161	NA	2015-03-17	NA	NA	2878
Acronicta_auricoma	Bergheim: Siggerwiesen â€˘ GE-0007	1996-07-01	1996	404.164	NA	2002-12-03	NA	NA	904.384
Acronicta_auricoma	Werfenweng: Observation-Fundort â€˘ 13,29640/47,45093	2020-07-01	2020	1374.5	NA	1982-02-16	NA	NA	3933.26
Acronicta_auricoma	Wagrain: Observation-Fundort â€˘ 13,34044/47,32774	2020-07-01	2020	1677.77	NA	1990-04-27	NA	NA	12238.3
Acronicta_auricoma	Muhr: Pfeifenberger â€˘ PG-0090	1976-07-01	1976	1194.51	NA	1984-01-01	NA	NA	7016.32
Acronicta_auricoma	Muhr: Pfeifenberger â€˘ PG-0090	1984-07-01	1984	1194.51	NA	1984-01-01	NA	NA	7016.32
Acronicta_auricoma	Muhr: Pfeifenberger â€˘ PG-0090	1974-07-01	1974	1194.51	NA	1984-01-01	NA	NA	7016.32
Acronicta_auricoma	Thalgau Ortsgebiet â€˘ PG-0347	1958-07-01	1958	544.737	NA	1975-09-30	NA	NA	2340.76
Acronicta_auricoma	Thalgau Ortsgebiet â€˘ PG-0347	1958-07-01	1958	544.737	NA	1975-09-30	NA	NA	2340.76
Acronicta_auricoma	Saalfelden am Steinernen Meer Ortsgebiet â€˘ PG-0281	1965-07-01	1965	740	NA	1983-12-15	NA	NA	3104.28
Acronicta_auricoma	Eugendorf Ortsgebiet â€˘ PG-0200	1945-07-01	1945	556.879	NA	1973-10-01	NA	NA	3888.41
Acronicta_auricoma	Muhr: Pfeifenberger â€˘ PG-0090	1972-07-01	1972	1194.51	NA	1984-01-01	NA	NA	7016.32
Acronicta_auricoma	Tamsweg: Observation-Fundort â€˘ 13,86049/47,1362	2022-07-01	2022	1107.42	NA	2002-12-03	NA	NA	4546.38
Acronicta_auricoma	Muhr: Pfeifenberger â€˘ PG-0090	1984-07-01	1984	1194.51	NA	1984-01-01	NA	NA	7016.32
Acronicta_auricoma	Muhr: Pfeifenberger â€˘ PG-0090	1972-07-01	1972	1194.51	NA	1984-01-01	NA	NA	7016.32
Acronicta_auricoma	Piesendorf: Walchen â€˘ GE-0013	1983-07-01	1983	861.48	NA	2016-02-01	NA	NA	3261.59
Acronicta_auricoma	Piesendorf: Walchen â€˘ GE-0013	1980-07-01	1980	861.48	NA	2016-02-01	NA	NA	3261.59
Acronicta_auricoma	Piesendorf: Walchen, Gasteg â€˘ PG-1900	1983-07-01	1983	911.81	NA	2016-02-01	NA	NA	3149.17
Acronicta_auricoma	Piesendorf: Walchen, Gasteg â€˘ PG-1900	1980-07-01	1980	911.81	NA	2016-02-01	NA	NA	3149.17
Acronicta_cuspis	Oberndorf bei Salzburg: Stadtgebiet â€˘ GE-0166	1963-07-01	1963	401.06	NA	2002-12-03	NA	NA	69.9502
Acronicta_cuspis	Oberndorf bei Salzburg: Stadtgebiet â€˘ GE-0166	1963-07-01	1963	401.06	NA	2002-12-03	NA	NA	69.9502
Acronicta_cuspis	Oberndorf bei Salzburg: Stadtgebiet â€˘ GE-0166	1963-07-01	1963	401.06	NA	2002-12-03	NA	NA	69.9502
Acronicta_cuspis	GrĂ¶dig: GrĂ¶dig > Glanegg â€˘ PG-0718	1995-07-01	1995	441.71	NA	2015-03-17	NA	NA	1751.03
Acronicta_cuspis	Salzburg Stadt: Liefering, Salzachseen â€˘ NW (Saalachspitz) â€˘ PG-0510	1956-07-01	1956	409.823	NA	2002-12-03	NA	NA	3312.76
Acronicta_cuspis	Abtenau Ortsgebiet â€˘ PG-0354	1929-07-01	1929	714.61	NA	1982-02-16	NA	NA	2658.48
Acronicta_cuspis	Berndorf bei Salzburg Ortsgebiet â€˘ PG-1513	1943-07-01	1943	551.834	NA	1972-12-01	NA	NA	1788.5
Acronicta_cuspis	Abtenau Ortsgebiet â€˘ PG-0354	1929-07-01	1929	714.61	NA	1982-02-16	NA	NA	2658.48
Acronicta_cuspis	Abtenau Ortsgebiet â€˘ PG-0354	1927-07-01	1927	714.61	NA	1982-02-16	NA	NA	2658.48
Acronicta_cuspis	Salzburg Stadt: Hallwang, Kasern â€˘ PG-0273	1942-07-01	1942	498.487	NA	2015-03-17	NA	NA	5051.82
Acronicta_cuspis	Pfarrwerfen Ortsgebiet â€˘ PG-0180	1962-07-01	1962	535.08	NA	1982-02-16	NA	NA	3573.97
Acronicta_cuspis	Rauris: HĂĽttwinkltal, Bucheben â€˘ PG-0584	1957-07-01	1957	1129.52	NA	1984-01-01	NA	NA	246.511
Acronicta_cuspis	Rauris: WĂ¶rth â€˘ PG-0025	1963-07-01	1963	958.6	NA	1984-01-01	NA	NA	606.919
Acronicta_cuspis	Rauris: HĂĽttwinkltal, Bucheben â€˘ PG-0584	1957-07-01	1957	1129.52	NA	1984-01-01	NA	NA	246.511
Acronicta_cuspis	St. Georgen bei Salzburg: Roding â€˘ PG-0679	1972-07-01	1972	446.205	NA	2002-12-03	NA	NA	1009.66
Acronicta_cuspis	Oberndorf bei Salzburg: Stadtgebiet â€˘ GE-0166	1962-07-01	1962	401.06	NA	2002-12-03	NA	NA	69.9502
Acronicta_cuspis	Leogang: Hst. Leogang â€˘ PG-0410	1962-07-01	1962	825.73	NA	1983-12-15	NA	NA	8095.5
Acronicta_cuspis	Salzburg Stadt: Nonntal, Thumegger Bezirk â€˘ GE-0012	2013-07-01	2013	424.724	NA	2015-03-17	NA	NA	357.071
Acronicta_cuspis	Kaprun Ortsgebiet â€˘ GE-0019	1952-07-01	1952	812.85	NA	1972-12-28	NA	NA	3836.13
Acronicta_cuspis	Uttendorf Ortsgebiet â€˘ PG-0639	1952-07-01	1952	796.73	NA	2016-02-01	NA	NA	5244.56
Acronicta_cuspis	Uttendorf: Stubachtal, Wirtenbach-MĂĽndung â€˘ GE-0001	1954-07-01	1954	806.34	NA	2018-12-31	NA	NA	5362.2
Acronicta_cuspis	St. Georgen bei Salzburg: Roding â€˘ PG-0679	1973-07-01	1973	446.205	NA	2002-12-03	NA	NA	1009.66
Acronicta_cuspis	Maishofen: Ortsgebiet â€˘ PG-1216	1962-07-01	1962	767.54	NA	1972-12-28	NA	NA	5492.53
Acronicta_cuspis	Abtenau Ortsgebiet â€˘ PG-0354	1928-07-01	1928	714.61	NA	1982-02-16	NA	NA	2658.48
Acronicta_cuspis	Abtenau Ortsgebiet â€˘ PG-0354	1928-07-01	1928	714.61	NA	1982-02-16	NA	NA	2658.48
Acronicta_cuspis	Saalfelden am Steinernen Meer: Observation-Fundort â€˘ 12,84312/47,42823	2019-07-01	2019	736.56	NA	1983-12-15	NA	NA	3259.47
Acronicta_cuspis	Saalfelden am Stein.Meer Ortsgebiet: Neubaugasse	2017-07-01	2017	736.75	NA	1983-12-15	NA	NA	3245.07
Acronicta_euphorbiae	Thalgau Ortsgebiet â€˘ PG-0347	1940-07-01	1940	544.737	NA	1975-09-30	NA	NA	2340.76
Acronicta_euphorbiae	Golling an der Salzach: Pass Lueg â€˘ POE-0018	2011-07-01	2011	495.44	NA	1983-12-15	NA	NA	552.641
Acronicta_euphorbiae	Golling an der Salzach Ortsgebiet â€˘ PG-0225	1958-07-01	1958	467.92	NA	2002-12-03	NA	NA	1771.24
Acronicta_euphorbiae	Salzburg Stadt (ungenau) â€˘ 410-435 m â€˘ PG-0346	1961-07-01	1961	423.869	NA	2015-03-17	NA	NA	866.906
Acronicta_euphorbiae	GroĂźgmain: KĂĽhbach-Tal, Veitlbruch â€˘ PG-0221	1974-07-01	1974	632.422	NA	2003-09-19	NA	NA	1829.15
Acronicta_euphorbiae	Schwarzach im Pongau Ortsgebiet â€˘ PG-0633	1958-07-01	1958	595.33	NA	1990-04-27	NA	NA	3088.82
Acronicta_euphorbiae	Taxenbach Ortsgebiet â€˘ PG-0821	1958-07-01	1958	765.78	NA	2005-02-22	NA	NA	9181.75
Acronicta_euphorbiae	Lofer: Loferbach-Tal, "Steppenhang" â€˘ PG-0420	2009-07-01	2009	643.03	NA	2018-12-31	NA	NA	5143.58
Acronicta_euphorbiae	Muhr: Pfeifenberger â€˘ PG-0090	1993-07-01	1993	1194.51	NA	1984-01-01	NA	NA	7016.32
Acronicta_euphorbiae	Uttendorf: Stubachtal, Wurfbach-Tal, Wurf Hochalm â€˘ PG-0016	1948-07-01	1948	1884.87	NA	1984-01-01	NA	NA	367.844
Acronicta_euphorbiae	Salzburg Stadt: Liefering, Salzachseen â€˘ NW (Saalachspitz) â€˘ PG-0510	1957-07-01	1957	409.823	NA	2002-12-03	NA	NA	3312.76
Acronicta_euphorbiae	Salzburg Stadt (ungenau) â€˘ 410-435 m â€˘ PG-0346	1936-07-01	1936	423.869	NA	2015-03-17	NA	NA	866.906
Acronicta_euphorbiae	Salzburg Stadt: Gaisberg, Gipfel â€˘ PG-0202	1940-07-01	1940	1272.08	NA	2015-03-17	NA	NA	5407.59
Acronicta_euphorbiae	Salzburg Stadt: Gaisberg, Gipfel â€˘ PG-0202	1940-07-01	1940	1272.08	NA	2015-03-17	NA	NA	5407.59
Acronicta_euphorbiae	Salzburg Stadt: Gaisberg, Gipfel â€˘ PG-0202	1989-07-01	1989	1272.08	NA	2015-03-17	NA	NA	5407.59
Acronicta_euphorbiae	Salzburg Stadt: MĂ¶nchsberg â€˘ PG-0658	1955-07-01	1955	431.537	NA	2015-03-17	NA	NA	878.234
Acronicta_euphorbiae	Salzburg Stadt: Aigen, Parsch â€˘ PG-0208	1955-07-01	1955	432.161	NA	2015-03-17	NA	NA	2878
Acronicta_euphorbiae	Muhr: Pfeifenberger â€˘ PG-0090	2002-07-01	2002	1194.51	NA	1984-01-01	NA	NA	7016.32
Acronicta_euphorbiae	Saalbach-Hinterglemm: Hinterglemm / hinteres Glemmtal (ungenau) â€˘ PG-0067	1973-07-01	1973	1320.96	NA	2018-12-31	NA	NA	12239.6
Acronicta_euphorbiae	Muhr: Pfeifenberger â€˘ PG-0090	1975-07-01	1975	1194.51	NA	1984-01-01	NA	NA	7016.32
Acronicta_euphorbiae	Muhr: Pfeifenberger â€˘ PG-0090	1974-07-01	1974	1194.51	NA	1984-01-01	NA	NA	7016.32
Acronicta_euphorbiae	Saalbach-Hinterglemm: Hinterglemm / hinteres Glemmtal (ungenau) â€˘ PG-0067	1973-07-01	1973	1320.96	NA	2018-12-31	NA	NA	12239.6
Acronicta_euphorbiae	Zell am See Ortsgebiet â€˘ PG-0780	1952-07-01	1952	759.13	NA	1972-12-28	NA	NA	1238.34
Acronicta_euphorbiae	Saalbach-Hinterglemm: Hinterglemm / hinteres Glemmtal (ungenau) â€˘ PG-0067	1973-07-01	1973	1320.96	NA	2018-12-31	NA	NA	12239.6
Acronicta_euphorbiae	Saalbach-Hinterglemm: Hinterglemm / hinteres Glemmtal (ungenau) â€˘ PG-0067	1973-07-01	1973	1320.96	NA	2018-12-31	NA	NA	12239.6
Acronicta_euphorbiae	Muhr: Pfeifenberger â€˘ PG-0090	1996-07-01	1996	1194.51	NA	1984-01-01	NA	NA	7016.32
Acronicta_euphorbiae	Muhr: Pfeifenberger â€˘ PG-0090	1993-07-01	1993	1194.51	NA	1984-01-01	NA	NA	7016.32
Acronicta_euphorbiae	Salzburg Stadt: Gaisberg, Gipfel â€˘ PG-0202	1940-07-01	1940	1272.08	NA	2015-03-17	NA	NA	5407.59
Acronicta_euphorbiae	Abtenau: Einberg â€˘ POE-0006	2011-07-01	2011	1149.2	NA	2005-02-22	NA	NA	6598.45
Acronicta_euphorbiae	Muhr: Pfeifenberger â€˘ PG-0090	1981-07-01	1981	1194.51	NA	1984-01-01	NA	NA	7016.32
Acronicta_euphorbiae	Muhr: Pfeifenberger â€˘ PG-0090	1975-07-01	1975	1194.51	NA	1984-01-01	NA	NA	7016.32
Acronicta_euphorbiae	Muhr: Pfeifenberger â€˘ PG-0090	1993-07-01	1993	1194.51	NA	1984-01-01	NA	NA	7016.32
Acronicta_euphorbiae	Muhr: Pfeifenberger â€˘ PG-0090	1979-07-01	1979	1194.51	NA	1984-01-01	NA	NA	7016.32
Acronicta_euphorbiae	Uttendorf: Stubachtal, Schneiderau â€˘ PG-0219	1950-07-01	1950	1006.22	NA	1984-01-01	NA	NA	1399.67
Acronicta_euphorbiae	Werfen: Eisriesenwelt (Aufstieg) â€˘ POE-0012	2011-07-01	2011	904.18	NA	1982-02-16	NA	NA	28.0709
Acronicta_euphorbiae	Thomatal Ortsgebiet â€˘ PG-0179	1974-07-01	1974	1044.42	NA	2015-03-17	NA	NA	4175.81
Acronicta_euphorbiae	Thomatal Ortsgebiet â€˘ PG-0179	1974-07-01	1974	1044.42	NA	2015-03-17	NA	NA	4175.81
Acronicta_euphorbiae	Rauris: WĂ¶rth â€˘ PG-0025	1953-07-01	1953	958.6	NA	1984-01-01	NA	NA	606.919
Acronicta_euphorbiae	Wald im Pinzgau: Observation-Fundort â€˘ 12,22573/47,24824	2019-07-01	2019	890.96	NA	1984-01-01	NA	NA	2151.63
Acronicta_euphorbiae	Rauris: WĂ¶rth â€˘ PG-0025	1963-07-01	1963	958.6	NA	1984-01-01	NA	NA	606.919
Acronicta_euphorbiae	Rauris: WĂ¶rth â€˘ PG-0025	1958-07-01	1958	958.6	NA	1984-01-01	NA	NA	606.919
Acronicta_euphorbiae	Mauterndorf Ortsgebiet â€˘ PG-0066	1922-07-01	1922	1123.06	NA	2016-02-01	NA	NA	1739.45
Acronicta_euphorbiae	Mauterndorf Ortsgebiet â€˘ PG-0066	1924-07-01	1924	1123.06	NA	2016-02-01	NA	NA	1739.45
Acronicta_euphorbiae	Muhr: Pfeifenberger â€˘ PG-0090	1973-07-01	1973	1194.51	NA	1984-01-01	NA	NA	7016.32
Acronicta_euphorbiae	Muhr: Pfeifenberger â€˘ PG-0090	1973-07-01	1973	1194.51	NA	1984-01-01	NA	NA	7016.32
Acronicta_euphorbiae	Thomatal Ortsgebiet â€˘ PG-0179	1975-07-01	1975	1044.42	NA	2015-03-17	NA	NA	4175.81
Acronicta_euphorbiae	Thomatal Ortsgebiet â€˘ PG-0179	1974-07-01	1974	1044.42	NA	2015-03-17	NA	NA	4175.81
Acronicta_euphorbiae	Mauterndorf Ortsgebiet â€˘ PG-0066	1921-07-01	1921	1123.06	NA	2016-02-01	NA	NA	1739.45
Acronicta_euphorbiae	Thomatal Ortsgebiet â€˘ PG-0179	1975-07-01	1975	1044.42	NA	2015-03-17	NA	NA	4175.81
Acronicta_euphorbiae	Hallwang Ortsgebiet â€˘ PG-0330	1936-07-01	1936	509.733	NA	1980-01-25	NA	NA	3857.03
Acronicta_euphorbiae	St. Koloman: Kertererbach-Tal, Grubach, "Grubachklamm" (Scheffau) â€˘ PG-0640	1944-07-01	1944	676.57	NA	2016-02-01	NA	NA	2805.12
Acronicta_euphorbiae	Golling an der Salzach: Pass Lueg â€˘ POE-0018	2011-07-01	2011	495.44	NA	1983-12-15	NA	NA	552.641
Acronicta_euphorbiae	Abtenau Ortsgebiet â€˘ PG-0354	1930-07-01	1930	714.61	NA	1982-02-16	NA	NA	2658.48
Acronicta_euphorbiae	Abtenau Ortsgebiet â€˘ PG-0354	1930-07-01	1930	714.61	NA	1982-02-16	NA	NA	2658.48
Acronicta_euphorbiae	Faistenau: Tiefbrunnau, KĂĽhleiten / "KĂĽhleitenalm" â€˘ GE-0018	1975-07-01	1975	909.45	NA	2016-02-01	NA	NA	7570.21
Acronicta_euphorbiae	St. Gilgen: FĂĽrberg, Falkenstein-Weg, "Scheffelblick" â€˘ PG-1325	2009-07-01	2009	693.45	NA	1973-07-27	NA	NA	5170.46
Acronicta_euphorbiae	Golling an der Salzach: PaĂź Lueg â€˘ PG-0538	2013-07-01	2013	550.88	NA	1982-02-16	NA	NA	1959.16
Acronicta_euphorbiae	Golling an der Salzach: PaĂź Lueg â€˘ PG-0538	2015-07-01	2015	550.88	NA	1982-02-16	NA	NA	1959.16
Acronicta_euphorbiae	Golling an der Salzach: PaĂź Lueg â€˘ PG-0538	2014-07-01	2014	550.88	NA	1982-02-16	NA	NA	1959.16
Acronicta_euphorbiae	Hallwang: SĂ¶llheim â€˘ PG-0338	1955-07-01	1955	455.046	NA	1980-01-25	NA	NA	5036.4
Acronicta_euphorbiae	Pfarrwerfen Ortsgebiet â€˘ PG-0180	1956-07-01	1956	535.08	NA	1982-02-16	NA	NA	3573.97
Acronicta_euphorbiae	StraĂźwalchen: Steindorf â€˘ GE-0010	1962-07-01	1962	545.605	NA	2002-12-03	NA	NA	3990.7
Acronicta_euphorbiae	Abtenau: Observation-Fundort â€˘ 13,32614/47,67552	2022-07-01	2022	1305.68	NA	2005-02-22	NA	NA	1374.92
Acronicta_euphorbiae	Abtenau: Einberg â€˘ POE-0007	2011-07-01	2011	1111.01	NA	2005-02-22	NA	NA	6465.8
Acronicta_euphorbiae	MĂĽhlbach am HochkĂ¶nig: Dientner Sattel, Birgkarhaus â€˘ PG-0655	1954-07-01	1954	1368.35	NA	1983-12-15	NA	NA	558.792
Acronicta_euphorbiae	Muhr: Pfeifenberger â€˘ PG-0090	1973-07-01	1973	1194.51	NA	1984-01-01	NA	NA	7016.32
Acronicta_euphorbiae	Muhr: Pfeifenberger â€˘ PG-0090	1976-07-01	1976	1194.51	NA	1984-01-01	NA	NA	7016.32
Acronicta_euphorbiae	Muhr: Pfeifenberger â€˘ PG-0090	1975-07-01	1975	1194.51	NA	1984-01-01	NA	NA	7016.32
Acronicta_euphorbiae	Muhr: Pfeifenberger â€˘ PG-0090	1973-07-01	1973	1194.51	NA	1984-01-01	NA	NA	7016.32
Acronicta_euphorbiae	Salzburg Stadt: Leopoldskron-Moos, Moor W Gneis / "Gneiser Moor" â€˘ GE-0005	1971-07-01	1971	435.996	NA	2015-03-17	NA	NA	384.555
Acronicta_euphorbiae	Salzburg Stadt: Aigen, Parsch â€˘ PG-0208	1959-07-01	1959	432.161	NA	2015-03-17	NA	NA	2878
Acronicta_euphorbiae	Salzburg Stadt: MĂ¶nchsberg â€˘ PG-0658	1951-07-01	1951	431.537	NA	2015-03-17	NA	NA	878.234
Acronicta_euphorbiae	Salzburg Stadt: MĂ¶nchsberg â€˘ PG-0658	1950-07-01	1950	431.537	NA	2015-03-17	NA	NA	878.234
Acronicta_euphorbiae	Thomatal: Feldbach-Tal, SchĂ¶nfeld, Dr.-Josef-Mehrl-HĂĽtte â€˘ PG-0140	1999-07-01	1999	1724.72	NA	1983-02-23	NA	NA	41.2026
Acronicta_euphorbiae	Saalbach-Hinterglemm: Lohbach-Tal, Turneralm â€˘ GE-0027	2002-07-01	2002	1398.69	NA	2016-02-01	NA	NA	13823.3
Acronicta_euphorbiae	Bad Hofgastein: SchloĂźalm-Gebiet â€˘ PG-0027	1960-07-01	1960	2107.95	NA	1984-01-01	NA	NA	6304.4
Acronicta_euphorbiae	Bad Hofgastein: SchloĂźalm-Gebiet â€˘ PG-0027	1961-07-01	1961	2107.95	NA	1984-01-01	NA	NA	6304.4
Acronicta_euphorbiae	Saalfelden am Steinernen Meer: Hohlwegen, StoĂźwand â€˘ FuĂź â€˘ PG-2691	2013-07-01	2013	689.18	NA	1983-12-15	NA	NA	174.537
Acronicta_euphorbiae	Saalfelden am Steinernen Meer Ortsgebiet â€˘ PG-0281	1958-07-01	1958	740	NA	1983-12-15	NA	NA	3104.28
Acronicta_euphorbiae	Abtenau Ortsgebiet â€˘ PG-0354	1926-07-01	1926	714.61	NA	1982-02-16	NA	NA	2658.48
Acronicta_euphorbiae	Saalfelden am Steinernen Meer: Hohlwegen, StoĂźwand â€˘ FuĂź â€˘ PG-2691	2013-07-01	2013	689.18	NA	1983-12-15	NA	NA	174.537
Acronicta_euphorbiae	Lofer: Loferbach-Tal, "Steppenhang" â€˘ PG-0420	2009-07-01	2009	643.03	NA	2018-12-31	NA	NA	5143.58
Acronicta_euphorbiae	GroĂźgmain: KĂĽhbach-Tal, Veitlbruch â€˘ PG-0221	1987-07-01	1987	632.422	NA	2003-09-19	NA	NA	1829.15
Acronicta_euphorbiae	WeiĂźbach bei Lofer (ungenau) â€˘ PG-0320	1955-07-01	1955	664.86	NA	1983-12-15	NA	NA	5089.17
Acronicta_euphorbiae	Lofer: Loferbach-Tal, "Steppenhang" â€˘ PG-0420	2009-07-01	2009	643.03	NA	2018-12-31	NA	NA	5143.58
Acronicta_euphorbiae	Rauris: WĂ¶rth â€˘ PG-0025	1963-07-01	1963	958.6	NA	1984-01-01	NA	NA	606.919
Acronicta_euphorbiae	Rauris: WĂ¶rth â€˘ PG-0025	1975-07-01	1975	958.6	NA	1984-01-01	NA	NA	606.919
Acronicta_euphorbiae	Uttendorf: Stubachtal, Schneiderau â€˘ PG-0219	1971-07-01	1971	1006.22	NA	1984-01-01	NA	NA	1399.67
Acronicta_euphorbiae	Uttendorf: Stubachtal, Schneiderau, Fellern â€˘ PG-0390	1948-07-01	1948	987.32	NA	1984-01-01	NA	NA	2032.86
Acronicta_euphorbiae	Saalfelden am Steinernen Meer: Gerling â€˘ PG-0280	1962-07-01	1962	786.38	NA	1983-12-15	NA	NA	7537.73
Acronicta_euphorbiae	Abtenau Ortsgebiet â€˘ PG-0354	1926-07-01	1926	714.61	NA	1982-02-16	NA	NA	2658.48
Acronicta_euphorbiae	Uttendorf: Stubachtal, Wirtenbach-MĂĽndung â€˘ GE-0001	1953-07-01	1953	806.34	NA	2018-12-31	NA	NA	5362.2
Acronicta_euphorbiae	Mauterndorf Ortsgebiet â€˘ PG-0066	1923-07-01	1923	1123.06	NA	2016-02-01	NA	NA	1739.45
Acronicta_euphorbiae	Muhr Ortsgebiet â€˘ PG-0580	1963-07-01	1963	1129.38	NA	1984-01-01	NA	NA	7311.58
Acronicta_euphorbiae	Saalbach-Hinterglemm: Hinterglemm / hinteres Glemmtal (ungenau) â€˘ PG-0067	1968-07-01	1968	1320.96	NA	2018-12-31	NA	NA	12239.6
Acronicta_euphorbiae	Saalbach-Hinterglemm: Hinterglemm / hinteres Glemmtal (ungenau) â€˘ PG-0067	1952-07-01	1952	1320.96	NA	2018-12-31	NA	NA	12239.6
Acronicta_euphorbiae	St. Martin am Tennengebirge: LungĂ¶tz, Lammertal, Scharfer Steig â€˘ 1040-1120 m â€˘ PG-2479	2010-07-01	2010	1059.44	NA	1982-02-16	NA	NA	199.568
Acronicta_euphorbiae	Thomatal Ortsgebiet â€˘ PG-0179	1976-07-01	1976	1044.42	NA	2015-03-17	NA	NA	4175.81
Acronicta_euphorbiae	Werfen: Observation-Fundort â€˘ 13,19161/47,50167	2021-07-01	2021	1017.92	NA	1982-02-16	NA	NA	2.82685
Acronicta_euphorbiae	St. Michael im Lungau Ortsgebiet â€˘ PG-0387	1921-07-01	1921	1060.3	NA	2015-03-17	NA	NA	5894.93
Acronicta_euphorbiae	Muhr: Pfeifenberger â€˘ PG-0090	1983-07-01	1983	1194.51	NA	1984-01-01	NA	NA	7016.32
Acronicta_euphorbiae	Muhr: Pfeifenberger â€˘ PG-0090	1983-07-01	1983	1194.51	NA	1984-01-01	NA	NA	7016.32
Acronicta_euphorbiae	Muhr: Pfeifenberger â€˘ PG-0090	1974-07-01	1974	1194.51	NA	1984-01-01	NA	NA	7016.32
Acronicta_euphorbiae	Muhr: Pfeifenberger â€˘ PG-0090	1983-07-01	1983	1194.51	NA	1984-01-01	NA	NA	7016.32
Acronicta_euphorbiae	Saalbach-Hinterglemm: Hinterglemm / hinteres Glemmtal (ungenau) â€˘ PG-0067	1969-07-01	1969	1320.96	NA	2018-12-31	NA	NA	12239.6
Acronicta_euphorbiae	Saalbach-Hinterglemm: Hinterglemm / hinteres Glemmtal (ungenau) â€˘ PG-0067	1968-07-01	1968	1320.96	NA	2018-12-31	NA	NA	12239.6
Acronicta_euphorbiae	Muhr: Pfeifenberger â€˘ PG-0090	1981-07-01	1981	1194.51	NA	1984-01-01	NA	NA	7016.32
Acronicta_euphorbiae	Muhr: Pfeifenberger â€˘ PG-0090	2004-07-01	2004	1194.51	NA	1984-01-01	NA	NA	7016.32
Acronicta_euphorbiae	Thomatal Ortsgebiet â€˘ PG-0179	1974-07-01	1974	1044.42	NA	2015-03-17	NA	NA	4175.81
Acronicta_euphorbiae	Thomatal Ortsgebiet â€˘ PG-0179	1974-07-01	1974	1044.42	NA	2015-03-17	NA	NA	4175.81
Acronicta_euphorbiae	Thomatal Ortsgebiet â€˘ PG-0179	1974-07-01	1974	1044.42	NA	2015-03-17	NA	NA	4175.81
Acronicta_euphorbiae	Thomatal Ortsgebiet â€˘ PG-0179	1974-07-01	1974	1044.42	NA	2015-03-17	NA	NA	4175.81
Acronicta_euphorbiae	Uttendorf: Stubachtal, Schneiderau â€˘ PG-0219	1973-07-01	1973	1006.22	NA	1984-01-01	NA	NA	1399.67
Acronicta_euphorbiae	Uttendorf: Stubachtal, Schneiderau â€˘ PG-0219	1972-07-01	1972	1006.22	NA	1984-01-01	NA	NA	1399.67
Acronicta_euphorbiae	Thomatal Ortsgebiet â€˘ PG-0179	1974-07-01	1974	1044.42	NA	2015-03-17	NA	NA	4175.81
Acronicta_euphorbiae	Thomatal Ortsgebiet â€˘ PG-0179	1974-07-01	1974	1044.42	NA	2015-03-17	NA	NA	4175.81
Acronicta_euphorbiae	Thomatal Ortsgebiet â€˘ PG-0179	1976-07-01	1976	1044.42	NA	2015-03-17	NA	NA	4175.81
Acronicta_euphorbiae	Thomatal Ortsgebiet â€˘ PG-0179	1975-07-01	1975	1044.42	NA	2015-03-17	NA	NA	4175.81
Acronicta_euphorbiae	Thomatal Ortsgebiet â€˘ PG-0179	1976-07-01	1976	1044.42	NA	2015-03-17	NA	NA	4175.81
Acronicta_euphorbiae	Thomatal Ortsgebiet â€˘ PG-0179	1976-07-01	1976	1044.42	NA	2015-03-17	NA	NA	4175.81
Acronicta_euphorbiae	Thomatal Ortsgebiet â€˘ PG-0179	1974-07-01	1974	1044.42	NA	2015-03-17	NA	NA	4175.81
Acronicta_euphorbiae	Thomatal Ortsgebiet â€˘ PG-0179	1974-07-01	1974	1044.42	NA	2015-03-17	NA	NA	4175.81
Acronicta_euphorbiae	Thomatal Ortsgebiet â€˘ PG-0179	1975-07-01	1975	1044.42	NA	2015-03-17	NA	NA	4175.81
Acronicta_euphorbiae	Thomatal Ortsgebiet â€˘ PG-0179	1975-07-01	1975	1044.42	NA	2015-03-17	NA	NA	4175.81
Acronicta_euphorbiae	Kaprun: Kapruner Achental, LĂ¤rchwand â€˘ GE-0002	1965-07-01	1965	1539.5	NA	1984-01-01	NA	NA	1277.37
Acronicta_euphorbiae	Kaprun: Kapruner Achental, LĂ¤rchwand â€˘ GE-0002	1965-07-01	1965	1539.5	NA	1984-01-01	NA	NA	1277.37
Acronicta_euphorbiae	Tweng: Obertauern, Jugendheim Schaidberg â€˘ PG-0033	2001-07-01	2001	1616.33	NA	2002-12-03	NA	NA	1704.4
Acronicta_euphorbiae	GroĂźgmain: Observation-Fundort â€˘ 12,96786/47,72077	2022-07-01	2022	1512.92	NA	2003-09-19	NA	NA	2881.84
Acronicta_euphorbiae	Kaprun: Kapruner Achental, LĂ¤rchwand â€˘ GE-0002	1965-07-01	1965	1539.5	NA	1984-01-01	NA	NA	1277.37
Acronicta_euphorbiae	Untertauern: Obertauern â€˘ PG-0112	1973-07-01	1973	1740.04	NA	2002-12-03	NA	NA	321.518
Acronicta_euphorbiae	Untertauern: Obertauern â€˘ PG-0112	1960-07-01	1960	1740.04	NA	2002-12-03	NA	NA	321.518
Acronicta_euphorbiae	Zederhaus: Riedingtal (ungenau) â€˘ Hinteres Riedingtal â€˘ PG-0184	1970-07-01	1970	1822.32	NA	2016-02-01	NA	NA	971.143
Acronicta_euphorbiae	Muhr: RotgĂĽlden, Unterer RotgĂĽldensee â€˘ PG-0139	1976-07-01	1976	1747.73	NA	1984-01-01	NA	NA	1247.21
Acronicta_euphorbiae	Zederhaus: Riedingtal (ungenau) â€˘ Hinteres Riedingtal â€˘ PG-0184	1969-07-01	1969	1822.32	NA	2016-02-01	NA	NA	971.143
Acronicta_euphorbiae	Muhr: Pfeifenberger â€˘ PG-0090	1992-07-01	1992	1194.51	NA	1984-01-01	NA	NA	7016.32
Acronicta_euphorbiae	Muhr: Pfeifenberger â€˘ PG-0090	1991-07-01	1991	1194.51	NA	1984-01-01	NA	NA	7016.32
Acronicta_euphorbiae	Abtenau: Observation-Fundort â€˘ 13,32528/47,67694	2020-07-01	2020	1324.21	NA	2005-02-22	NA	NA	1464.23
Acronicta_euphorbiae	Muhr: Pfeifenberger â€˘ PG-0090	1975-07-01	1975	1194.51	NA	1984-01-01	NA	NA	7016.32
Acronicta_euphorbiae	Muhr: Pfeifenberger â€˘ PG-0090	1974-07-01	1974	1194.51	NA	1984-01-01	NA	NA	7016.32
Acronicta_euphorbiae	Muhr: Pfeifenberger â€˘ PG-0090	1985-07-01	1985	1194.51	NA	1984-01-01	NA	NA	7016.32
Acronicta_euphorbiae	Muhr: Pfeifenberger â€˘ PG-0090	1983-07-01	1983	1194.51	NA	1984-01-01	NA	NA	7016.32
Acronicta_euphorbiae	Fusch an der GroĂźglocknerstraĂźe: Ferleitental, Trauneralm â€˘ PG-0083	1951-07-01	1951	1540.44	NA	1984-01-01	NA	NA	232.001
Acronicta_euphorbiae	Fusch an der GroĂźglocknerstraĂźe: Ferleitental, Trauneralm â€˘ PG-0083	1954-07-01	1954	1540.44	NA	1984-01-01	NA	NA	232.001
Acronicta_euphorbiae	MĂĽhlbach am HochkĂ¶nig: Trockenbach-Tal, Stegmoosalm â€˘ PG-0175	2004-07-01	2004	1445.32	NA	1983-12-15	NA	NA	419.201
Acronicta_euphorbiae	Krimml: Wildgerlostal, Finkaualm â€˘ S â€˘ TAV08-Zone 1-KURM 01	2008-07-01	2008	1457.55	NA	1984-01-01	NA	NA	653.118
Acronicta_euphorbiae	Golling an der Salzach Ortsgebiet â€˘ PG-0225	1938-07-01	1938	467.92	NA	2002-12-03	NA	NA	1771.24
Acronicta_euphorbiae	Golling an der Salzach Ortsgebiet â€˘ PG-0225	1939-07-01	1939	467.92	NA	2002-12-03	NA	NA	1771.24
Acronicta_euphorbiae	Golling an der Salzach Ortsgebiet â€˘ PG-0225	1955-07-01	1955	467.92	NA	2002-12-03	NA	NA	1771.24
Acronicta_euphorbiae	Puch bei Hallein Ortsgebiet â€˘ PG-1650	1976-07-01	1976	439.942	NA	2002-12-03	NA	NA	6589.22
Acronicta_euphorbiae	Puch bei Hallein: Urstein, "Ursteiner Au" â€˘ PG-0357	1999-07-01	1999	437.261	NA	2015-03-17	NA	NA	4798.6
Acronicta_euphorbiae	Kuchl Ortsgebiet â€˘ PG-0486	1939-07-01	1939	467.21	NA	2016-02-01	NA	NA	1694.42
Acronicta_euphorbiae	Salzburg Stadt: MĂ¶nchsberg, Festungsberg â€˘ PG-1211	1918-07-01	1918	531.551	NA	2015-03-17	NA	NA	662.791
Acronicta_euphorbiae	Golling an der Salzach: Pass Lueg â€˘ POE-0018	2010-07-01	2010	495.44	NA	1983-12-15	NA	NA	552.641
Acronicta_euphorbiae	St. Koloman: Kertererbach-Tal, Grubach, "Grubachklamm" (Scheffau) â€˘ PG-0640	1939-07-01	1939	676.57	NA	2016-02-01	NA	NA	2805.12
Acronicta_euphorbiae	Muhr: SticklerhĂĽtte-Umgebung â€˘ PG-2331	2009-07-01	2009	1739.66	NA	1984-01-01	NA	NA	2015.24
Acronicta_euphorbiae	Bad Hofgastein: SchloĂźalm-Gebiet â€˘ PG-0027	1960-07-01	1960	2107.95	NA	1984-01-01	NA	NA	6304.4
Acronicta_euphorbiae	Bad Hofgastein: SchloĂźalm-Gebiet â€˘ PG-0027	1960-07-01	1960	2107.95	NA	1984-01-01	NA	NA	6304.4
Acronicta_euphorbiae	Elsbethen: Observation-Fundort â€˘ 13,08128/47,76461	2022-07-01	2022	427.122	NA	2015-03-17	NA	NA	3122.66
Acronicta_euphorbiae	Rauris: GroĂźglocknerstraĂźe, MittertĂ¶rl â€˘ PG-0003	1995-07-01	1995	2260.57	NA	1984-01-01	NA	NA	68.7506
Acronicta_euphorbiae	Bad Hofgastein: SchloĂźalm-Gebiet â€˘ PG-0027	1955-07-01	1955	2107.95	NA	1984-01-01	NA	NA	6304.4
Acronicta_euphorbiae	Bad Hofgastein: SchloĂźalm-Gebiet â€˘ PG-0027	1959-07-01	1959	2107.95	NA	1984-01-01	NA	NA	6304.4
Acronicta_euphorbiae	Muhr: Pfeifenberger â€˘ PG-0090	1987-07-01	1987	1194.51	NA	1984-01-01	NA	NA	7016.32
Acronicta_euphorbiae	Muhr: Pfeifenberger â€˘ PG-0090	1984-07-01	1984	1194.51	NA	1984-01-01	NA	NA	7016.32
Acronicta_euphorbiae	Muhr: Pfeifenberger â€˘ PG-0090	1975-07-01	1975	1194.51	NA	1984-01-01	NA	NA	7016.32
Acronicta_euphorbiae	Muhr: Pfeifenberger â€˘ PG-0090	1974-07-01	1974	1194.51	NA	1984-01-01	NA	NA	7016.32
Acronicta_euphorbiae	Muhr: Pfeifenberger â€˘ PG-0090	1972-07-01	1972	1194.51	NA	1984-01-01	NA	NA	7016.32
Acronicta_euphorbiae	Muhr: Pfeifenberger â€˘ PG-0090	1972-07-01	1972	1194.51	NA	1984-01-01	NA	NA	7016.32
Acronicta_euphorbiae	Muhr: Pfeifenberger â€˘ PG-0090	1984-07-01	1984	1194.51	NA	1984-01-01	NA	NA	7016.32
Acronicta_euphorbiae	Muhr: Pfeifenberger â€˘ PG-0090	1976-07-01	1976	1194.51	NA	1984-01-01	NA	NA	7016.32
Acronicta_euphorbiae	Muhr: Pfeifenberger â€˘ PG-0090	1993-07-01	1993	1194.51	NA	1984-01-01	NA	NA	7016.32
Acronicta_euphorbiae	Muhr: Pfeifenberger â€˘ PG-0090	1991-07-01	1991	1194.51	NA	1984-01-01	NA	NA	7016.32
Acronicta_euphorbiae	Abtenau: Einberg â€˘ POE-0007	2011-07-01	2011	1111.01	NA	2005-02-22	NA	NA	6465.8
Acronicta_euphorbiae	Muhr: Pfeifenberger â€˘ PG-0090	1981-07-01	1981	1194.51	NA	1984-01-01	NA	NA	7016.32
Acronicta_euphorbiae	Muhr: Pfeifenberger â€˘ PG-0090	1976-07-01	1976	1194.51	NA	1984-01-01	NA	NA	7016.32
Acronicta_euphorbiae	Muhr: Pfeifenberger â€˘ PG-0090	1984-07-01	1984	1194.51	NA	1984-01-01	NA	NA	7016.32
Acronicta_euphorbiae	Muhr: Pfeifenberger â€˘ PG-0090	1983-07-01	1983	1194.51	NA	1984-01-01	NA	NA	7016.32
Acronicta_euphorbiae	Saalfelden am Steinernen Meer: Krw. DieĂźbach â€˘ W â€˘ PG-0415	1987-07-01	1987	688.45	NA	1983-12-15	NA	NA	250.488
Acronicta_euphorbiae	Saalfelden am Steinernen Meer Ortsgebiet â€˘ PG-0281	1960-07-01	1960	740	NA	1983-12-15	NA	NA	3104.28
Acronicta_euphorbiae	Saalfelden am Steinernen Meer: Gerling â€˘ PG-0280	1965-07-01	1965	786.38	NA	1983-12-15	NA	NA	7537.73
Acronicta_euphorbiae	Saalfelden am Steinernen Meer: Gerling â€˘ PG-0280	1965-07-01	1965	786.38	NA	1983-12-15	NA	NA	7537.73
Acronicta_euphorbiae	Golling an der Salzach: PaĂź Lueg â€˘ PG-0538	2018-07-01	2018	550.88	NA	1982-02-16	NA	NA	1959.16
Acronicta_euphorbiae	Saalbach-Hinterglemm: Hinterglemm / hinteres Glemmtal (ungenau) â€˘ PG-0067	1970-07-01	1970	1320.96	NA	2018-12-31	NA	NA	12239.6
Acronicta_euphorbiae	Muhr: Pfeifenberger â€˘ PG-0090	1972-07-01	1972	1194.51	NA	1984-01-01	NA	NA	7016.32
Acronicta_euphorbiae	Saalbach-Hinterglemm: Hinterglemm / hinteres Glemmtal (ungenau) â€˘ PG-0067	1971-07-01	1971	1320.96	NA	2018-12-31	NA	NA	12239.6
Acronicta_euphorbiae	Uttendorf: Stubachtal, Schneiderau, Fellern â€˘ PG-0390	1948-07-01	1948	987.32	NA	1984-01-01	NA	NA	2032.86
Acronicta_euphorbiae	Bad Gastein Ortsgebiet â€˘ PG-0985	1965-07-01	1965	989.22	NA	1984-01-01	NA	NA	2334.34
Acronicta_euphorbiae	Uttendorf: Stubachtal, Schneiderau â€˘ PG-0219	1970-07-01	1970	1006.22	NA	1984-01-01	NA	NA	1399.67
Acronicta_euphorbiae	Uttendorf: Stubachtal, Schneiderau, Fellern â€˘ PG-0390	1948-07-01	1948	987.32	NA	1984-01-01	NA	NA	2032.86
Acronicta_euphorbiae	MĂĽhlbach am HochkĂ¶nig: Trockenbach-Tal, Stegmoosalm â€˘ PG-0175	1997-07-01	1997	1445.32	NA	1983-12-15	NA	NA	419.201
Acronicta_euphorbiae	Sankt Gilgen: Observation-Fundort â€˘ 13,34059/47,73612	2019-07-01	2019	1459.66	NA	2016-02-01	NA	NA	4696.36
Acronicta_euphorbiae	GrĂ¶dig: GrĂ¶dig > Glanegg â€˘ PG-0718	1976-07-01	1976	441.71	NA	2015-03-17	NA	NA	1751.03
Acronicta_euphorbiae	Filzmoos: Observation-Fundort â€˘ 13,57156/47,46309	2013-07-01	2013	1571.02	NA	1981-05-14	NA	NA	10103
Acronicta_euphorbiae	Muhr: Pfeifenberger â€˘ PG-0090	1977-07-01	1977	1194.51	NA	1984-01-01	NA	NA	7016.32
Acronicta_euphorbiae	Salzburg Stadt: Gaisberg, Judenberg â€˘ PG-0934	1957-07-01	1957	728.354	NA	2015-03-17	NA	NA	4387.31
Acronicta_euphorbiae	Uttendorf: Stubachtal, Enzingerboden â€˘ GE-0009	1967-07-01	1967	1475.6	NA	1984-01-01	NA	NA	579.873
Acronicta_euphorbiae	Strobl: Observation-Fundort â€˘ 13,43622/47,69835	2021-07-01	2021	1327.77	NA	1973-07-27	NA	NA	2237.66
Acronicta_leporina	Schwarzach im Pongau Ortsgebiet â€˘ PG-0633	1956-07-01	1956	595.33	NA	1990-04-27	NA	NA	3088.82
Acronicta_leporina	Muhr: Pfeifenberger â€˘ PG-0090	2003-07-01	2003	1194.51	NA	1984-01-01	NA	NA	7016.32
Acronicta_leporina	Saalbach-Hinterglemm: Hinterglemm / hinteres Glemmtal (ungenau) â€˘ PG-0067	1971-07-01	1971	1320.96	NA	2018-12-31	NA	NA	12239.6
Acronicta_leporina	Muhr: Pfeifenberger â€˘ PG-0090	2004-07-01	2004	1194.51	NA	1984-01-01	NA	NA	7016.32
Acronicta_leporina	Muhr: Pfeifenberger â€˘ PG-0090	2004-07-01	2004	1194.51	NA	1984-01-01	NA	NA	7016.32
Acronicta_leporina	Rauris Ortsgebiet â€˘ PG-0181	1965-07-01	1965	944	NA	1984-01-01	NA	NA	4527.36
Acronicta_leporina	Leogang: Hst. Leogang â€˘ PG-0410	1962-07-01	1962	825.73	NA	1983-12-15	NA	NA	8095.5
Acronicta_leporina	Saalbach-Hinterglemm: Hinterglemm / hinteres Glemmtal (ungenau) â€˘ PG-0067	1971-07-01	1971	1320.96	NA	2018-12-31	NA	NA	12239.6
Acronicta_leporina	Uttendorf: Stubachtal, Schneiderau â€˘ PG-0219	1970-07-01	1970	1006.22	NA	1984-01-01	NA	NA	1399.67
Acronicta_leporina	Muhr: Pfeifenberger â€˘ PG-0090	1986-07-01	1986	1194.51	NA	1984-01-01	NA	NA	7016.32
Acronicta_leporina	Muhr: Pfeifenberger â€˘ PG-0090	1984-07-01	1984	1194.51	NA	1984-01-01	NA	NA	7016.32
Acronicta_leporina	Salzburg Stadt: Liefering, Rott â€˘ PG-0382	1935-07-01	1935	417.889	NA	2002-12-03	NA	NA	4176.53
Acronicta_leporina	Muhr: Pfeifenberger â€˘ PG-0090	1993-07-01	1993	1194.51	NA	1984-01-01	NA	NA	7016.32
Acronicta_leporina	Muhr: Pfeifenberger â€˘ PG-0090	1972-07-01	1972	1194.51	NA	1984-01-01	NA	NA	7016.32
Acronicta_leporina	Muhr: Pfeifenberger â€˘ PG-0090	1974-07-01	1974	1194.51	NA	1984-01-01	NA	NA	7016.32
Acronicta_leporina	Muhr: Pfeifenberger â€˘ PG-0090	1984-07-01	1984	1194.51	NA	1984-01-01	NA	NA	7016.32
Acronicta_leporina	Muhr: Pfeifenberger â€˘ PG-0090	1981-07-01	1981	1194.51	NA	1984-01-01	NA	NA	7016.32
Acronicta_leporina	Hallein: KĂ¶nigsseeache-Ufer â€˘ PG-0358	1982-07-01	1982	433.429	NA	2015-03-17	NA	NA	4696.54
Acronicta_leporina	Salzburg Stadt: Aigen, Parsch â€˘ PG-0208	1956-07-01	1956	432.161	NA	2015-03-17	NA	NA	2878
Acronicta_leporina	Salzburg Stadt: MĂ¶nchsberg â€˘ PG-0658	1955-07-01	1955	431.537	NA	2015-03-17	NA	NA	878.234
Acronicta_leporina	Salzburg Stadt: MĂ¶nchsberg â€˘ PG-0658	1951-07-01	1951	431.537	NA	2015-03-17	NA	NA	878.234
Acronicta_leporina	Salzburg Stadt: Leopoldskron-Moos, Leopoldskroner Weiher â€˘ GE-0023	1990-07-01	1990	430.626	NA	2015-03-17	NA	NA	51.6804
Acronicta_leporina	Salzburg Stadt: Leopoldskron-Moos, Leopoldskroner Weiher â€˘ GE-0023	1981-07-01	1981	430.626	NA	2015-03-17	NA	NA	51.6804
Acronicta_leporina	Salzburg Stadt: Aigen, Parsch â€˘ PG-0208	1956-07-01	1956	432.161	NA	2015-03-17	NA	NA	2878
Acronicta_leporina	Salzburg Stadt: Gaisberg, Kapaunberg â€˘ PG-0737	1989-07-01	1989	752.263	NA	2015-03-17	NA	NA	4380.04
Acronicta_leporina	Lofer: Loferbach-Tal, "Steppenhang" â€˘ PG-0420	2009-07-01	2009	643.03	NA	2018-12-31	NA	NA	5143.58
Acronicta_leporina	Salzburg Stadt: Hallwang, Kasern â€˘ PG-0273	1934-07-01	1934	498.487	NA	2015-03-17	NA	NA	5051.82
Acronicta_leporina	St. Gilgen: Kienberg, Mondsee-Ufer bei Scharfling (St. Lorenz, OĂ–) â€˘ GE-0025	2008-07-01	2008	481.93	NA	1973-07-27	NA	NA	8928.64
Acronicta_leporina	Salzburg Stadt: Leopoldskron-Moos, Leopoldskroner Weiher â€˘ GE-0023	1985-07-01	1985	430.626	NA	2015-03-17	NA	NA	51.6804
Acronicta_leporina	Salzburg Stadt: Aigen, Parsch â€˘ PG-0208	2014-07-01	2014	432.161	NA	2015-03-17	NA	NA	2878
Acronicta_leporina	Salzburg Stadt: Aigen, Parsch â€˘ PG-0208	1955-07-01	1955	432.161	NA	2015-03-17	NA	NA	2878
Acronicta_leporina	Salzburg Stadt: Aigen, Parsch â€˘ PG-0208	2016-07-01	2016	432.161	NA	2015-03-17	NA	NA	2878
Acronicta_leporina	Salzburg Stadt: Nonntal, Thumegger Bezirk â€˘ GE-0012	2017-07-01	2017	424.724	NA	2015-03-17	NA	NA	357.071
Acronicta_leporina	Salzburg Stadt: Aigen, Parsch â€˘ PG-0208	1954-07-01	1954	432.161	NA	2015-03-17	NA	NA	2878
Acronicta_leporina	Salzburg Stadt: MĂ¶nchsberg â€˘ PG-0658	1951-07-01	1951	431.537	NA	2015-03-17	NA	NA	878.234
Acronicta_leporina	Salzburg Stadt: MĂ¶nchsberg â€˘ PG-0658	1951-07-01	1951	431.537	NA	2015-03-17	NA	NA	878.234
Acronicta_leporina	Anif: Neu Anif â€˘ PG-0746	1975-07-01	1975	446.733	NA	2015-03-17	NA	NA	2972.51
Acronicta_leporina	Salzburg Stadt: MĂ¶nchsberg â€˘ PG-0658	1952-07-01	1952	431.537	NA	2015-03-17	NA	NA	878.234
Acronicta_leporina	Salzburg Stadt: Leopoldskron-Moos, Moor W Gneis / "Gneiser Moor" â€˘ GE-0005	1972-07-01	1972	435.996	NA	2015-03-17	NA	NA	384.555
Acronicta_leporina	Salzburg Stadt: Morzg, Hellbrunn, Alter Bach, Salzach-Au / "Hellbrunner Au" â€˘ PG-0701	1928-07-01	1928	428.055	NA	2015-03-17	NA	NA	2729.7
Acronicta_leporina	Salzburg Stadt: MĂ¶nchsberg â€˘ PG-0658	1950-07-01	1950	431.537	NA	2015-03-17	NA	NA	878.234
Acronicta_leporina	Salzburg Stadt: Leopoldskron-Moos, Moor W Gneis / "Gneiser Moor" â€˘ GE-0005	1973-07-01	1973	435.996	NA	2015-03-17	NA	NA	384.555
Acronicta_leporina	Muhr: Pfeifenberger â€˘ PG-0090	2003-07-01	2003	1194.51	NA	1984-01-01	NA	NA	7016.32
Acronicta_leporina	Muhr: Pfeifenberger â€˘ PG-0090	2004-07-01	2004	1194.51	NA	1984-01-01	NA	NA	7016.32
Acronicta_leporina	Koppl: Winkl, "Spechtenschmiede" â€˘ W â€˘ PG-0909	1976-07-01	1976	742.43	NA	1975-09-30	NA	NA	7098.18
Acronicta_leporina	St. Gilgen: FĂĽrberg, Falkenstein-Weg, "Scheffelblick" â€˘ PG-1325	2005-07-01	2005	693.45	NA	1973-07-27	NA	NA	5170.46
Acronicta_leporina	Muhr: Observation-Fundort â€˘ 13,49815/47,09891	2022-07-01	2022	1121.28	NA	1984-01-01	NA	NA	7299
Acronicta_leporina	Salzburg Stadt: Leopoldskron-Moos, Leopoldskroner Weiher â€˘ GE-0023	1982-07-01	1982	430.626	NA	2015-03-17	NA	NA	51.6804
Acronicta_leporina	Salzburg Stadt: Leopoldskron-Moos, Leopoldskroner Weiher â€˘ GE-0023	1982-07-01	1982	430.626	NA	2015-03-17	NA	NA	51.6804
Acronicta_leporina	Salzburg Stadt: Nonntal, Thumegger Bezirk â€˘ GE-0012	1992-07-01	1992	424.724	NA	2015-03-17	NA	NA	357.071
Acronicta_leporina	Salzburg Stadt: Leopoldskron-Moos, Leopoldskroner Weiher â€˘ GE-0023	1986-07-01	1986	430.626	NA	2015-03-17	NA	NA	51.6804
Acronicta_leporina	Salzburg Stadt (ungenau) â€˘ 410-435 m â€˘ PG-0346	1952-07-01	1952	423.869	NA	2015-03-17	NA	NA	866.906
Acronicta_leporina	Salzburg Stadt (ungenau) â€˘ 410-435 m â€˘ PG-0346	1952-07-01	1952	423.869	NA	2015-03-17	NA	NA	866.906
Acronicta_leporina	Salzburg Stadt: Leopoldskron-Moos, Leopoldskroner Weiher â€˘ GE-0023	1985-07-01	1985	430.626	NA	2015-03-17	NA	NA	51.6804
Acronicta_leporina	Bergheim Ortsgebiet â€˘ PG-0360	1953-07-01	1953	427.029	NA	2002-12-03	NA	NA	3736.31
Acronicta_leporina	Abtenau Ortsgebiet â€˘ PG-0354	1926-07-01	1926	714.61	NA	1982-02-16	NA	NA	2658.48
[truncated: 272,580+ more rows]

## Sheet: A2
Functional trait expression determines contrasting temporal trends of Lepidoptera inside and outside protected areas
Table A2. Salzburg Lepidoptera records. Summary numbers of records for each species from all sampling sites before or after assigment as protected area (PA).
Species	Number of records
	After PA erection	Before PA erection	Outside any PA
Abraxas grossulariatus	0	0	1
Abraxas sylvata	18	119	231
Abrostola asclepiadis	20	136	109
Abrostola tripartita	31	76	193
Abrostola triplasia	19	43	160
Acasis appensata	3	4	3
Acasis viretata	12	9	41
Acentria ephemerella	5	24	21
Acherontia atropos	5	11	110
Achlya flavicornis	7	16	127
Acleris abietana	3	7	3
Acleris aspersana	5	3	25
Acleris bergmanniana	0	1	4
Acleris cristana	0	2	3
Acleris emargana	4	0	11
Acleris ferrugana	3	0	23
Acleris forsskaleana	7	2	32
Acleris hastiana	13	4	12
Acleris holmiana	0	0	2
Acleris hyemana	2	0	1
Acleris kochiella	3	0	2
Acleris laterana	10	8	20
Acleris literana	0	0	1
Acleris logiana	1	11	4
Acleris lorquiniana	0	0	1
Acleris maccana	2	0	0
Acleris notana	21	3	3
Acleris rhombana	0	0	4
Acleris rufana	0	15	0
Acleris schalleriana	2	6	6
Acleris sparsana	13	10	52
Acleris umbrana	0	0	3
Acleris variegana	6	0	58
Acontia lucida	0	1	1
Acronicta aceris	12	102	146
Acronicta alni	32	127	171
Acronicta auricoma	64	115	134
Acronicta cuspis	2	49	27
Acronicta euphorbiae	99	120	196
Acronicta leporina	50	56	213
Acronicta megacephala	40	73	168
Acronicta menyanthidis	0	2	0
Acronicta psi	28	101	246
Acronicta rumicis	59	73	393
Acronicta strigosa	10	42	19
Actebia praecox	0	6	55
Actinotia polyodon	19	112	133
Adoxophyes orana	27	11	33
Adscita geryon	14	30	151
Adscita statices	43	104	243
Aedia funesta	2	0	33
Aethalura punctulata	33	33	113
Aetheria bicolorata	0	0	4
Aetheria dysodea	0	0	1
Aethes aurofasciana	3	0	2
Aethes cnicana	8	14	28
Aethes decimana	6	2	5
Aethes hartmanniana	29	3	52
Aethes rubigana	5	16	20
Aethes smeathmanniana	16	0	5
Aethes tesserana	1	3	81
Agapeta hamana	0	0	10
Agapeta zoegana	6	4	79
Aglais io	382	178	1563
Aglais urticae	498	162	2054
Aglia tau	25	79	394
Agonopterix alpigena	1	14	2
Agonopterix alstromeriana	0	0	1
Agonopterix angelicella	18	7	3
Agonopterix arenella	18	2	50
Agonopterix assimilella	3	0	1
Agonopterix astrantiae	1	2	0
Agonopterix capreolella	0	0	4
Agonopterix carduella	6	0	0
Agonopterix ciliella	3	3	12
Agonopterix conterminella	0	0	7
Agonopterix doronicella	4	0	1
Agonopterix heracliana	17	15	78
Agonopterix hypericella	0	0	2
Agonopterix kaekeritziana	0	3	12
Agonopterix laterella	0	0	2
Agonopterix liturosa	0	12	17
Agonopterix ocellana	17	9	28
Agonopterix pallorella	0	0	2
Agonopterix parilella	0	0	3
Agonopterix petasitis	17	4	28
Agonopterix propinquella	0	0	4
Agonopterix purpurea	0	0	5
Agonopterix senecionis	0	0	3
Agonopterix silerella	1	0	0
Agonopterix yeatiana	2	1	1
Agriades glandon	0	0	4
Agriades optilete	23	33	77
Agriades orbitulus	45	145	169
Agriopis aurantiaria	0	9	166
Agriopis bajaria	0	0	28
Agriopis leucophaearia	0	37	54
Agriopis marginaria	6	39	321
Agriphila inquinatella	1	3	29
Agriphila selasella	1	0	5
Agriphila straminella	139	8	126
Agriphila tristella	49	6	140
Agrius convolvuli	15	19	236
Agrochola circellaris	21	49	340
Agrochola helvola	33	53	176
Agrochola litura	4	14	241
Agrochola lota	23	34	168
Agrochola lychnidis	0	6	52
Agrochola macilenta	0	12	192
Agrochola nitida	1	23	106
Agrotera nemoralis	8	4	16
Agrotis cinerea	1	18	84
Agrotis clavis	25	79	218
Agrotis exclamationis	88	101	434
Agrotis fatidica	15	39	141
Agrotis ipsilon	198	119	531
Agrotis segetum	22	5	198
Agrotis simplonia	67	164	151
Albocosta musiva	3	0	0
Alcis bastelbergeri	7	44	167
Alcis deversata	0	0	35
Alcis jubata	12	5	41
Alcis repandata	236	190	681
Aleimma loeflingiana	0	3	31
Algedonia terrealis	59	2	32
Allophyes oxyacanthae	10	29	231
Alsophila aescularia	8	44	344
Amata phegea	0	0	2
Ammoconia caecimacula	2	34	151
Amphipoea fucosa	13	24	112
Amphipoea lucens	72	170	46
Amphipoea oculea	12	56	181
Amphipyra berbera	19	9	31
Amphipyra livida	0	0	4
Amphipyra perflua	9	78	160
Amphipyra pyramidea	39	64	363
Amphipyra tragopoginis	10	55	173
Anania coronata	20	3	40
Anania crocealis	0	0	1
Anania funebris	18	6	74
Anania fuscalis	15	23	46
Anania hortulata	30	7	129
Anania lancealis	0	0	12
Anania stachydalis	7	5	19
Anania verbascalis	0	0	1
Anaplectoides prasina	128	180	384
Anarta melanopa	12	36	57
Anarta myrtilli	31	98	25
Anarta odontites	9	73	89
Ancylis achatana	0	3	15
Ancylis apicella	13	7	28
Ancylis badiana	21	0	44
Ancylis comptana	0	0	2
Ancylis diminutana	3	0	11
Ancylis geminana	0	0	3
Ancylis laetana	16	6	18
Ancylis mitterbacheriana	1	4	40
Ancylis myrtillana	11	0	25
Ancylis obtusana	0	0	5
Ancylis subarcuana	0	0	1
Ancylis tineana	0	0	3
Ancylis uncella	0	6	0
Ancylis unculana	2	0	0
Ancylis unguicella	28	38	31
Ancylis upupana	0	0	5
Angerona prunaria	43	128	213
Anorthoa munda	0	0	10
Anthocharis cardamines	185	156	1136
Anticlea badiata	2	18	114
Anticlea derivata	0	8	30
Anticollix sparsata	1	10	28
Antitype chi	10	20	161
Apamea anceps	0	9	46
Apamea aquila	13	157	18
Apamea crenata	102	121	339
Apamea epomidion	5	14	41
Apamea furva	12	6	71
Apamea illyria	10	23	53
Apamea lateritia	10	13	160
Apamea lithoxylaea	10	46	124
Apamea maillardi	113	83	230
Apamea monoglypha	197	166	557
Apamea platinea	3	154	14
Apamea remissa	16	44	126
Apamea rubrirena	79	25	166
Apamea scolopacina	35	130	191
Apamea sordens	1	9	97
Apamea sublustris	5	20	210
Apamea unanimis	0	41	29
Apamea zeta	80	122	177
Apatura ilia	43	52	107
Apatura iris	28	52	219
Apeira syringaria	2	3	29
Aphantopus hyperantus	409	246	900
Aphelia paleana	15	0	53
Aphelia unitana	0	0	8
Aphelia viburnana	9	0	3
Aplocera efformata	0	2	7
Aplocera plagiata	0	7	14
Aplocera praeformata	183	97	577
Aplocera simpliciata	18	27	4
Apocheima hispidaria	2	40	1
Apocheima pilosaria	6	28	206
Aporia crataegi	107	137	750
Aporophyla lueneburgensis	0	0	37
Aporophyla lutulenta	0	0	8
Apotomis betuletana	34	36	28
Apotomis capreana	3	0	15
Apotomis infida	3	3	4
Apotomis inundana	2	0	3
Apotomis lineana	0	0	1
Apotomis sauciana	10	0	25
Apotomis semifasciana	1	2	2
Apotomis sororculana	2	0	1
Apotomis turbidana	22	1	19
Apterogenum ypsillon	9	36	46
Araschnia levana	302	133	687
Archanara geminipuncta	0	0	11
Archanara neurica	2	23	8
Archanara sparganii	12	0	7
Archiearis notha	2	50	26
Archiearis parthenias	11	11	137
Archips crataegana	0	0	8
Archips oporana	28	4	19
Archips podana	15	29	76
Archips rosana	1	7	29
Archips xylosteana	0	0	13
Arctia caja	99	100	368
Arctia flavia	27	57	0
Arctornis l-nigrum	15	167	122
Argynnis paphia	320	169	1235
Argyroploce arbutella	0	3	8
Argyroploce noricana	3	0	10
Argyrotaenia ljungiana	18	4	2
Arichanna melanaria	26	84	11
Aricia agestis	0	0	4
Aricia artaxerxes	12	59	315
Ascotis selenaria	0	0	4
Asteroscopus sphinx	4	22	58
Asthena albulata	7	50	88
Asthena anseraria	1	28	20
Aterpia anderreggana	15	0	16
Aterpia corticana	28	9	43
Aterpia sieversiana	0	0	2
Athetis gluteosa	2	147	4
Athetis pallustris	0	1	12
Atolmis rubricollis	69	103	260
Atypha pulmonaris	0	30	83
Auchmis detersa	14	79	130
Autographa aemula	9	0	10
Autographa bractea	134	163	407
Autographa buraetica	0	0	3
Autographa gamma	308	205	1222
Autographa jota	80	138	287
Autographa pulchrina	101	192	423
Axylia putris	81	120	351
Bactra lacteana	3	4	6
Bactra lancealana	37	7	85
Baptria tibiale	0	17	27
Bena bicolorana	2	12	56
Biston betularia	77	128	360
Biston strataria	9	47	225
Blastesthia mughiana	0	0	1
Boloria aquilonaris	71	152	195
Boloria dia	0	14	173
Boloria eunomia	68	197	236
Boloria euphrosyne	204	143	960
Boloria napaea	25	58	127
Boloria pales	139	142	333
Boloria selene	166	210	272
Boloria thore	51	124	138
Boloria titania	91	101	266
Boudinotiana notha	0	0	1
Brachionycha nubeculosa	4	58	196
Brachylomia viminalis	34	91	225
Brenthis ino	454	294	624
Bryophila domestica	1	2	73
Bryophila ereptricula	0	0	3
Bryophila raptricula	0	0	33
Bupalus piniaria	17	33	76
Cabera exanthemata	75	80	241
Cabera pusaria	237	165	443
Cacoecimorpha pronubana	0	0	2
Calliergis ramosa	25	31	51
Callimorpha dominula	31	81	201
Calliteara fascelina	0	0	1
Calliteara pudibunda	63	172	447
Callophrys rubi	89	77	213
Callopistria juventina	0	0	1
Calophasia lunula	0	2	41
Campaea margaritaria	66	96	321
Camptogramma bilineata	34	37	420
Camptogramma scripturata	4	0	10
Capua vulgana	8	8	3
Caradrina clavipalpis	6	19	188
Caradrina gilva	6	131	71
Caradrina kadenii	0	0	3
Caradrina morpheus	0	2	30
Caradrina selini	0	0	1
Carcharodus alceae	4	0	6
Carcharodus floccifera	64	47	147
Carsia sororiata	19	138	64
Carsia sororiata imbutata	3	0	0
Carterocephalus palaemon	127	156	649
Cataclysta lemnata	41	5	30
Catarhoe cuculata	40	59	196
Catarhoe rubidata	0	7	37
Catephia alchymista	0	0	4
Catharia simplonialis	3	0	8
Catocala electa	0	19	69
Catocala elocata	0	0	4
Catocala fraxini	3	9	64
Catocala fulminea	0	0	1
Catocala nupta	18	16	104
Catocala sponsa	0	7	32
Catopsilia florella	0	0	1
Catoptria combinella	11	11	52
Catoptria conchella	129	3	132
Catoptria falsella	57	62	93
Catoptria furcatellus	9	0	20
Catoptria languidellus	0	0	25
Catoptria luctiferella	2	0	15
Catoptria maculalis	6	0	0
Catoptria margaritella	72	54	105
Catoptria myella	56	43	162
Catoptria mytilella	10	7	4
Catoptria osthelderi	0	0	3
Catoptria permutatellus	13	0	5
Catoptria permutatellus/osthel	0	0	4
Catoptria petrificella	77	21	99
Catoptria pinella	4	0	8
Catoptria pyramidellus	37	30	70
Catoptria radiella	12	0	38
Catoptria speculalis	6	4	5
Catoptria verellus	9	19	33
Celaena leucostigma	7	37	69
Celastrina argiolus	69	84	257
Celypha aurofasciana	1	0	12
Celypha cespitana	50	7	28
Celypha flavipalpana	0	0	6
Celypha lacunana	124	13	230
Celypha rivulana	25	3	37
Celypha rosaceana	0	0	2
Celypha rufana	6	55	30
Celypha rurestrana	9	3	27
Celypha siderana	0	0	25
Celypha striana	7	0	59
Cepphis advenaria	19	106	112
Ceramica pisi	91	69	278
Cerapteryx graminis	144	70	267
Cerastis leucographa	10	43	106
Cerastis rubricosa	35	58	251
Cerura erminea	5	4	39
Cerura vinula	27	28	65
Charanyca trigrammica	5	48	183
Charissa ambiguata	2	15	47
Charissa intermedia	6	3	11
Charissa pullata	19	93	71
Chersotis alpestris	0	0	2
Chersotis cuprea	137	63	208
Chersotis margaritacea	3	82	101
Chersotis multangula	9	64	121
Chersotis ocellina	44	80	152
Chesias legatella	0	0	1
Chiasmia clathrata	132	101	698
Chilo phragmitella	45	9	26
Chilodes maritima	2	4	13
Chloantha hyperici	0	0	1
Chlorissa cloraria	3	31	59
Chlorissa viridata	0	0	5
Chloroclysta miata	48	29	194
Chloroclysta miata miata	0	0	2
Chloroclysta siterata	98	86	577
Chloroclystis v-ata	20	43	250
Choristoneura diversana	0	0	4
Choristoneura murinana	2	0	1
Chortodes fluxa	4	25	14
Chortodes pygmina	0	0	49
Chrysodeixis chalcites	0	0	4
Chrysoteuchia culmella	69	23	244
Cidaria fulvata	26	17	127
Cilix glaucata	0	0	2
Cleora cinctaria	0	3	38
Cleorodes lichenaria	0	0	11
Clepsis consimilana	1	0	7
Clepsis dumicolana	0	0	14
Clepsis rogana	13	0	54
Clepsis rurinana	3	0	8
Clepsis senecionana	12	5	33
Clepsis spectrana	0	0	5
Clepsis steineriana	3	0	21
Clostera anachoreta	6	46	33
Clostera anastomosis	2	72	23
Clostera curtula	6	66	186
Clostera pigra	17	57	112
Cnephasia alticolana	57	1	60
Cnephasia asseclana	14	11	21
Cnephasia communana	0	2	2
Cnephasia incertana	15	1	31
Cnephasia stephensiana	15	21	46
Cochylidia implicitana	0	5	5
Cochylidia moguntiana	0	0	1
Cochylidia rupicola	2	0	12
Cochylidia subroseana	0	0	1
Cochylis dubitana	5	0	10
Cochylis nana	0	0	1
Cochylis pallidana	22	0	6
Cochylis roseana	0	0	2
Coenonympha arcania	16	97	382
Coenonympha gardetta	124	171	312
Coenonympha glycerion	0	13	167
Coenonympha pamphilus	285	218	1325
Coenonympha tullia	120	317	191
Coenotephria salicata	128	112	185
Coenotephria tophaceata	17	90	146
Colias alfacariensis	12	13	217
Colias crocea	95	46	620
Colias hyale	97	72	594
Colias palaeno	94	289	223
Colias phicomone	54	126	351
Colobochyla salicalis	13	78	51
Colocasia coryli	38	68	336
Colostygia aptata	55	76	162
Colostygia aqueata	32	114	127
Colostygia austriacaria	0	1	7
Colostygia kollariaria	10	28	47
Colostygia olivata	14	28	147
Colostygia pectinataria	50	132	248
Colostygia turbata	28	48	148
Colotois pennaria	7	20	273
Comibaena bajularia	2	38	9
Conistra erythrocephala	0	8	14
Conistra ligula	2	0	13
Conistra rubiginea	5	24	133
Conistra rubiginosa	3	2	69
Conistra vaccinii	37	47	474
Coranarta cordigera	22	136	28
Cosmia affinis	4	1	20
Cosmia diffinis	0	3	5
Cosmia pyralina	2	41	97
Cosmia trapezina	55	104	360
Cosmorhoe ocellata	56	105	331
Cosmotriche lobulina	21	59	145
Cossus cossus	19	27	110
Costignophos pullata	6	0	0
Crambus alienellus	30	102	5
Crambus ericella	15	0	22
Crambus hamella	0	3	3
Crambus lathoniellus	197	26	349
Crambus pascuella	91	38	119
Crambus perlella	120	13	336
Crambus pratella	75	18	172
Crambus silvella	4	14	19
Crambus uliginosellus	8	12	25
Craniophora ligustri	55	201	382
Crocallis elinguaria	86	65	144
Crocota niveata	3	8	132
Cryphia algae	3	24	102
Crypsedra gemmea	56	34	174
Cucullia absinthii	0	0	10
Cucullia artemisiae	0	0	2
Cucullia asteris	3	17	42
Cucullia campanulae	6	8	25
Cucullia chamomillae	4	0	19
Cucullia lactucae	3	51	143
Cucullia lucifuga	48	49	282
Cucullia umbratica	42	46	228
Cupido argiades	0	2	13
Cupido minimus	50	44	494
Cyaniris semiargus	221	26	371
Cybosia mesomella	31	117	82
Cyclophora albipunctata	48	31	30
Cyclophora annularia	0	0	3
Cyclophora linearia	38	112	225
Cyclophora pendularia	8	0	13
Cyclophora porata	0	0	1
Cyclophora punctaria	5	45	37
Cyclophora puppillaria	0	0	7
Cydalima perspectalis	3	0	147
Cydia amplana	0	0	5
Cydia cognatana	0	0	2
Cydia coniferana	1	0	1
Cydia cosmophorana	0	0	2
Cydia fagiglandana	20	14	62
Cydia illutana	3	0	2
Cydia indivisa	1	0	3
Cydia inquinatana	0	0	2
Cydia nigricana	0	0	2
Cydia pactolana	1	3	2
Cydia pomonella	1	0	62
Cydia servillana	0	0	3
Cydia splendana	5	5	38
Cydia strobilella	1	4	17
Cydia succedana	0	4	1
Cymolomia hartigiana	0	0	1
Cynaeda dentalis	0	1	4
Daphnis nerii	0	0	7
Dasypolia ferdinandi	0	0	1
Dasypolia templi	0	12	85
Deilephila elpenor	42	134	333
Deilephila porcellus	50	92	374
Deileptenia ribeata	58	90	204
Deltote bankiana	55	167	52
Deltote deceptoria	0	10	91
Deltote pygarga	82	161	286
Deltote uncula	98	176	147
Dendrolimus pini	72	176	248
Depressaria albipunctella	3	0	3
Depressaria badiella	0	0	1
Depressaria chaerophylli	0	0	5
Depressaria douglasella	0	0	2
Depressaria heydenii	0	2	1
Depressaria libanotidella	0	0	2
Depressaria olerella	6	0	3
Depressaria pimpinellae	6	1	6
Depressaria pulcherrimella	0	0	1
Depressaria radiella	0	0	28
Diachrysia chrysitis	80	24	186
Diachrysia chryson	10	111	104
Diachrysia chryson chryson	0	0	1
Diachrysia stenochrysis	22	7	103
Diacrisia sannio	160	212	370
Diaphora mendica	0	16	46
Diarsia brunnea	75	162	325
Diarsia dahlii	3	17	87
Diarsia mendica	109	180	309
Diarsia rubi	28	104	281
Diasemia reticularis	37	9	136
Dicallomera fascelina	0	1	38
Dichagyris nigrescens	0	3	4
Dichagyris signifera	0	0	18
Dichelia histrionana	19	20	38
Dichonia convergens	0	0	5
Dichrorampha acuminatana	3	0	0
Dichrorampha aeratana	0	0	19
Dichrorampha agilana	0	0	1
Dichrorampha alpestrana	30	0	28
Dichrorampha alpigenana	6	0	2
Dichrorampha alpinana	0	0	4
Dichrorampha bugnionana	15	3	22
Dichrorampha cacaleana	3	0	3
Dichrorampha dentivalva	0	0	2
Dichrorampha flavidorsana	0	0	1
Dichrorampha petiverella	3	0	16
Dichrorampha plumbagana	0	0	4
Dichrorampha plumbana	5	0	18
Dichrorampha sedatana	0	0	6
Dichrorampha simpliciana	0	0	5
Dichrorampha vancouverana	0	0	4
Diloba caeruleocephala	0	8	92
Diplopseustis perieresalis	0	0	1
Discestra trifolii	6	29	69
Doloploca punctulana	6	8	1
Donacaula mucronella	32	10	8
Drepana falcataria	80	146	312
Drymonia dodonaea	17	127	282
Drymonia querna	0	24	7
Drymonia ruficornis	2	48	135
Dryobotodes eremita	0	3	12
Duponchelia fovealis	0	0	4
Dypterygia scabriuscula	0	37	2
Dysstroma citrata	173	190	422
Dysstroma truncata	213	133	502
Eana argentana	95	19	167
Eana canescana	3	30	8
Eana incanana	34	12	24
Eana osseana	171	19	161
Eana penziana	57	35	40
Earias clorana	27	77	86
Earophila badiata	0	0	6
Ebulea crocealis	8	18	34
Ecliptopera capitata	37	80	152
Ecliptopera silaceata	94	112	184
Ecpyrrhorrhoe rubiginalis	16	3	15
Ectropis crepuscularia	67	119	496
Egira conspicillaris	0	0	9
Eilema cereola	24	6	85
Eilema complana	115	150	232
Eilema depressa	103	209	363
Eilema griseola	22	14	37
Eilema lurideola	84	53	191
Eilema lutarella	0	0	58
Eilema sororcula	47	100	258
Elaphria venustula	32	7	15
Electrophaes corylata	27	30	74
Elophila nymphaeata	48	7	47
Elophos caelibaria	19	27	59
Elophos dilucidaria	116	73	280
Elophos operaria	0	3	0
Elophos serotinaria	1	4	45
Elophos vittaria	46	57	114
Elophos vittaria mendicaria	3	0	0
Elophos zirbitzensis	0	0	3
Ematurga atomaria	179	139	514
Emmelia trabealis	0	0	1
Enargia paleacea	7	5	117
Enarmonia formosana	0	8	6
Endothenia ericetana	2	0	6
Endothenia lapideana	0	0	2
Endothenia marginana	0	0	4
Endothenia nigricostana	0	2	11
Endothenia oblongana	2	0	8
Endothenia quadrimaculana	14	0	12
Endothenia ustulana	0	0	1
Ennomos alniaria	6	0	15
Ennomos autumnaria	4	6	101
Ennomos erosaria	6	80	133
Ennomos fuscantaria	9	57	199
Ennomos quercinaria	3	25	57
Entephria caeruleata	0	0	1
Entephria caesiata	267	127	404
Entephria cyanata	53	13	155
Entephria flavata	0	4	9
Entephria flavicinctata	45	31	116
Entephria infidaria	9	30	52
Entephria nobiliaria	50	15	101
Epagoge grotiana	3	0	1
Epiblema cirsiana	0	0	4
Epiblema costipunctana	3	0	1
Epiblema foenella	0	0	29
Epiblema grandaevana	32	14	89
Epiblema hepaticana	18	2	35
Epiblema scutulana	22	9	45
Epiblema similana	3	0	2
Epiblema simploniana	0	0	6
Epiblema sticticana	12	10	108
Epiblema turbidana	0	0	7
Epilecta linogrisea	0	0	30
Epilobophora sabinata	3	7	67
Epinotia abbreviana	0	0	15
Epinotia bilunana	13	3	4
Epinotia brunnichana	0	3	9
Epinotia cinereana	0	0	5
Epinotia cruciana	9	3	16
Epinotia demarniana	2	0	10
Epinotia fraternana	0	0	7
Epinotia granitana	15	0	0
Epinotia huebneriana	0	4	11
Epinotia immundana	11	0	3
Epinotia maculana	0	0	4
Epinotia mercuriana	24	0	28
Epinotia nanana	8	3	13
Epinotia nemorivaga	0	0	1
Epinotia nigricana	2	0	1
Epinotia nisella	5	0	23
Epinotia pusillana	0	1	1
Epinotia pygmaeana	0	1	4
Epinotia ramella	30	13	25
Epinotia rhomboidella	4	5	12
Epinotia rubiginosana	0	0	4
Epinotia signatana	4	0	9
Epinotia solandriana	12	1	9
Epinotia sordidana	2	0	0
Epinotia subocellana	26	0	8
Epinotia subsequana	0	0	1
Epinotia tedella	79	5	68
Epinotia tenerana	5	2	25
Epinotia tetraquetrana	16	6	7
Epinotia thapsiana	6	6	6
Epinotia trigonella	15	5	16
Epione repandaria	34	62	127
Epione vespertaria	10	9	27
Epipsilia grisescens	55	71	316
Epipsilia latens	11	3	29
Epirrhoe alternata	139	162	763
Epirrhoe galiata	77	127	123
Epirrhoe hastulata	1	4	41
Epirrhoe molluginata	52	42	200
Epirrhoe rivata	0	3	50
Epirrhoe tristata	65	92	302
Epirrita autumnata	14	39	244
Epirrita christyi	1	6	183
Epirrita dilutata	16	20	272
Erannis defoliaria	3	22	309
Erebia aethiops	143	147	708
Erebia alberganus	0	0	3
Erebia cassioides	61	47	91
Erebia claudina	0	0	96
Erebia epiphron	32	146	134
Erebia eriphyle	56	95	200
Erebia euryale	143	136	450
Erebia gorge	47	148	186
Erebia ligea	170	74	451
Erebia manto	94	186	260
Erebia medusa	33	68	420
Erebia melampus	133	156	241
Erebia meolans	0	0	1
Erebia nivalis	33	84	160
Erebia oeme	34	113	180
Erebia pandrose	47	128	212
Erebia pharte	75	95	257
Erebia pluto	13	7	26
Erebia pronoe	78	59	285
Erebia styx	8	21	44
Eriogaster arbusculae	10	12	13
Eriogaster lanestris	0	0	31
Eriopsela quadrana	0	3	7
Eriopygodes imbecilla	33	133	122
Erynnis tages	69	50	373
Eublemma parva	0	0	3
Euchalcia variabilis	107	161	240
Euchoeca nebulata	37	69	164
Euclidia glyphica	248	109	795
Euclidia mi	36	101	199
Eucosma aemulana	1	0	5
Eucosma aspidiscana	3	0	26
Eucosma campoliliana	15	7	26
Eucosma cana	21	6	23
Eucosma conterminana	0	0	1
Eucosma fervidana	0	2	0
Eucosma hohenwartiana	3	10	26
Eucosma obumbratana	0	0	3
Eucosma parvulana	0	0	1
Eucosma pupillana	0	0	1
Eucosmomorpha albersana	0	2	1
Eudemis porphyrana	3	0	5
Eudemis profundana	0	0	4
Eudonia delunella	0	0	1
Eudonia lacustrata	54	10	104
Eudonia laetella	0	0	4
Eudonia mercurella	7	2	9
Eudonia murana	41	11	42
Eudonia pallida	0	0	2
Eudonia petrophila	3	7	4
Eudonia phaeoleuca	0	3	2
Eudonia sudetica	83	13	57
Eudonia truncicolella	68	10	47
Eudonia vallesialis	40	1	68
Eugnorisma depuncta	42	36	241
Eugraphe sigma	36	118	93
Eulia ministrana	45	9	49
Eulithis mellinata	5	12	64
Eulithis populata	203	85	366
Eulithis prunata	23	10	148
Eulithis testata	5	94	12
Eumedonia eumedon	21	28	74
Euphydryas aurinia	341	244	472
Euphydryas aurinia glaciegenit	18	67	144
Euphydryas cynthia	24	150	153
Euphydryas intermedia	30	15	63
Euphydryas maturna	73	178	220
Euphyia adumbraria	5	53	1
Euphyia biangulata	2	4	22
Euphyia scripturata	9	106	100
Euphyia unangulata	30	0	18
Eupithecia abietaria	47	34	192
Eupithecia absinthiata	57	67	118
Eupithecia actaeata	0	0	5
Eupithecia analoga	15	9	38
Eupithecia assimilata	1	11	38
Eupithecia cauchiata	0	1	2
Eupithecia centaureata	3	39	74
Eupithecia conterminata	0	0	2
Eupithecia denotata	4	7	11
Eupithecia distinctaria	32	52	95
Eupithecia egenaria	0	0	14
Eupithecia ericeata	3	0	0
Eupithecia exiguata	12	22	41
Eupithecia expallidata	6	6	24
Eupithecia extraversaria	1	21	31
Eupithecia haworthiata	12	57	42
Eupithecia icterata	114	38	219
Eupithecia immundata	2	7	17
Eupithecia impurata	31	61	72
Eupithecia indigata	0	1	22
Eupithecia innotata	5	1	6
Eupithecia intricata	13	7	50
Eupithecia inturbata	0	0	1
Eupithecia lanceata	5	35	128
Eupithecia laquaearia	0	1	3
Eupithecia lariciata	92	42	147
Eupithecia linariata	0	0	7
Eupithecia millefoliata	0	0	2
Eupithecia nanata	35	63	27
Eupithecia pernotata	0	0	16
Eupithecia pimpinellata	6	7	27
Eupithecia plumbeolata	8	29	55
Eupithecia pusillata	39	13	77
Eupithecia pyreneata	3	3	23
Eupithecia satyrata	41	45	97
Eupithecia selinata	23	14	15
Eupithecia semigraphata	8	50	13
Eupithecia silenata	9	7	18
Eupithecia sinuosaria	5	11	32
Eupithecia subfuscata	57	75	137
Eupithecia subumbrata	10	32	37
Eupithecia succenturiata	0	1	64
Eupithecia tantillaria	84	101	289
Eupithecia tenuiata	4	0	20
Eupithecia thalictrata	0	0	3
Eupithecia tripunctaria	6	52	101
Eupithecia trisignaria	6	0	29
Eupithecia undata	3	1	4
Eupithecia valerianata	0	8	19
Eupithecia venosata	76	25	78
Eupithecia veratraria	88	35	67
Eupithecia virgaureata	7	1	9
Eupithecia vulgata	18	18	64
Euplagia quadripunctaria	35	42	470
Euplexia lucipara	81	118	369
Eupoecilia ambiguella	5	0	1
Eupoecilia angustana	7	1	10
Eupoecilia sanguisorbana	0	0	1
Euproctis chrysorrhoea	0	0	9
Euproctis similis	22	153	97
Eupsilia transversa	20	85	459
Eurois occulta	74	30	175
Eurrhypis pollinalis	0	0	3
Eustroma reticulata	16	31	114
Euthrix potatoria	83	111	196
Euxoa aquilina	0	0	8
Euxoa birivia	3	26	30
Euxoa culminicola	3	0	4
Euxoa decora	13	292	176
Euxoa nigricans	4	43	126
Euxoa obelisca	0	0	9
Euxoa recussa	3	11	96
Euxoa tritici	0	0	10
Evergestis aenealis	1	2	3
Evergestis extimalis	0	3	0
Evergestis forficalis	3	10	23
Evergestis limbata	0	0	1
Evergestis pallidata	5	20	41
Evergestis sophialis	20	36	27
Exaeretia ciniflonella	2	0	1
Exapate duratella	0	0	4
Fabriciana adippe	70	70	372
Fabriciana niobe	6	18	231
Fagivorina arenaria	0	6	21
Falcaria lacertinaria	57	62	64
Falseuncaria ruficiliana	3	0	11
Favonius quercus	0	5	16
Furcula bicuspis	45	39	62
Furcula bifida	9	18	81
Furcula furcula	50	50	159
Gagitodes sagittata	22	33	19
Gandaritis pyraliata	16	71	197
Gastropacha populifolia	0	2	5
Gastropacha quercifolia	16	9	23
Gazoryctra ganna	0	21	8
Geometra papilionaria	77	145	203
Glacies alpinata	31	114	223
Glacies alticolaria	0	12	34
Glacies canaliculata	6	66	84
Glacies coracina	26	87	129
Glacies noricana	12	15	41
Glaucopsyche alexis	0	0	26
Gluphisia crenata	22	43	69
Gnophos obfuscata	107	115	262
Gonepteryx rhamni	577	337	1774
Gortyna flavago	0	35	115
Grammia quenseli	3	15	16
Graphiphora augur	105	112	228
Grapholita aureolana	0	3	11
Grapholita compositella	1	0	15
Grapholita coronillana	0	0	3
Grapholita discretana	0	0	2
Grapholita funebrana	0	0	2
Grapholita jungiella	0	2	6
Grapholita tenebrosana	1	0	2
Griposia aprilina	8	20	66
Gymnoscelis rufifasciata	0	1	13
Gynnidomorpha permixtana	7	0	9
Gypsonoma dealbana	6	6	26
Gypsonoma nitidulana	0	0	1
Gypsonoma oppressana	0	2	4
Gypsonoma sociana	3	2	23
Habrosyne pyritoides	78	144	262
Hada plebeja	138	85	344
Hadena albimacula	5	88	79
Hadena bicruris	0	0	7
Hadena caesia	84	204	208
Hadena capsincola	0	6	53
Hadena compta	6	4	80
Hadena confusa	57	5	158
Hadena filograna	0	9	34
Hadena perplexa	12	166	185
Hamearis lucina	14	56	168
Harpyia milhauseri	6	26	86
Hecatera bicolorata	27	13	78
Hecatera dysodea	0	24	24
Hedya dimidiana	0	2	6
Hedya nubiferana	20	19	66
Hedya ochroleucana	0	6	12
Hedya pruniana	0	3	9
Hedya salicella	23	8	16
Helicoverpa armigera	21	0	41
Heliothis adaucta	0	1	21
Heliothis nubigera	0	0	2
Heliothis peltigera	44	15	109
Heliothis viriplaca	0	0	12
Hellula undalis	0	0	1
Hemaris fuciformis	11	29	161
Hemaris tityus	0	16	104
Hemistola chrysoprasaria	10	103	108
Hemithea aestivaria	21	46	116
Hepialus humuli	37	33	135
Herminia grisealis	32	64	134
Herminia tarsicrinalis	43	94	209
Herminia tarsipennalis	9	18	57
Hesperia comma	87	36	308
Hoplodrina alsinides	0	0	5
Hoplodrina ambigua	30	22	104
Hoplodrina blanda	12	71	270
Hoplodrina octogenaria	16	115	370
Hoplodrina respersa	8	159	95
Hoplodrina superstes	0	32	7
Horisme aemulata	37	38	92
Horisme calligraphata	0	0	4
Horisme radicaria	0	0	1
Horisme tersata	25	65	168
Horisme vitalbata	0	0	1
Hydraecia micacea	2	24	42
Hydraecia petasitis	0	2	6
Hydraecia ultima	0	0	18
Hydrelia flammeolaria	42	65	198
Hydrelia sylvata	49	140	126
Hydria cervinalis	10	0	12
Hydria undulata	32	30	92
Hydriomena furcata	52	64	254
Hydriomena impluviata	142	103	320
Hydriomena ruberata	85	4	92
Hylaea fasciaria	73	92	233
Hyles euphorbiae	3	60	107
Hyles gallii	6	3	79
Hyles livornica	9	3	44
Hypena crassalis	61	122	126
Hypena obesalis	27	26	175
Hypena proboscidalis	197	170	439
Hypena rostralis	2	4	63
Hypenodes humidalis	27	2	12
Hyphoraia aulica	0	0	3
Hypomecis punctinalis	75	78	279
Hypomecis roboraria	30	106	198
Hypoxystis pluviaria	0	0	1
Hyppa rectilinea	55	85	184
Idaea aversata	43	114	327
Idaea biselata	38	89	235
Idaea contiguaria	0	0	10
Idaea dilutaria	10	100	18
Idaea dimidiata	4	7	83
Idaea inquinata	3	0	31
Idaea ochrata	2	0	0
Idaea seriata	3	8	125
Idaea serpentata	23	31	207
Idaea straminata	16	39	63
Idaea sylvestraria	39	54	14
Idaea trigeminata	0	0	1
Iphiclides podalirius	0	13	47
Ipimorpha retusa	7	83	77
Ipimorpha subtusa	27	46	88
Isotrias hybridana	2	0	0
Isotrias rectifasciana	3	0	5
Issoria lathonia	12	19	227
Jodis lactearia	25	36	88
Jodis putata	16	21	90
Jordanita globulariae	0	11	0
Jordanita notata	0	1	0
Kemtrognophos ambiguata	9	0	0
Korscheltellus fusconebulosa	12	51	47
Lacanobia contigua	27	48	155
Lacanobia oleracea	10	54	255
Lacanobia splendens	0	0	1
Lacanobia suasa	13	41	195
Lacanobia thalassina	59	78	262
Lacanobia w-latinum	10	86	136
Lampropteryx otregiata	3	3	14
Lampropteryx suffumata	65	88	240
Lamprotes c-aureum	1	76	20
Laothoe populi	37	105	215
Larentia clavaria	0	0	49
Lasiocampa quercus	85	92	302
Lasiocampa trifolii	4	26	100
Lasiommata maera	100	60	712
Lasiommata megera	0	0	3
Lasiommata petropolitana	58	50	214
Lasionhada proxima	0	0	1
Lasionycta proxima	40	20	183
Laspeyria flexula	94	102	301
Lateroligia ophiogramma	23	116	133
Lathronympha strigana	37	10	74
Leptidea juvernica	2	9	61
Leptidea sinapis	8	13	69
Leptidea sinapis agg.	64	75	454
Leptotes pirithous	0	0	5
Leucania comma	6	0	5
Leucania obsoleta	14	54	28
Leucodonta bicoloria	32	2	12
Leucoma salicis	1	26	34
Levipalpus hepatariella	0	0	4
Ligdia adustata	33	71	176
Limenitis camilla	124	84	434
Limenitis populi	1	13	30
Lithomoia solidaginis	12	39	30
Lithophane consocia	31	24	259
Lithophane furcifera	0	18	118
Lithophane ornitopus	2	40	116
Lithophane semibrunnea	0	0	1
Lithophane socia	15	51	242
Lithosia quadra	50	154	258
Lobesia botrana	0	0	3
Lobesia occidentis	0	0	1
Lobesia reliquana	3	3	10
Lobophora halterata	23	29	111
Lomaspilis marginata	210	143	454
Lomographa bimaculata	14	53	210
Lomographa temerata	25	56	237
Lopinga achine	19	69	307
Loxostege manualis	0	0	3
Loxostege sticticalis	4	9	10
Lozotaenia forsterana	6	0	7
Luperina testacea	0	0	49
Lycaena alciphron	0	0	1
Lycaena dispar	15	0	3
Lycaena helle	19	37	21
Lycaena hippothoe	22	23	287
Lycaena phlaeas	48	32	384
Lycaena tityrus	55	47	342
Lycaena tityrus subalpina	90	39	176
Lycaena virgaureae	202	62	195
Lycia alpina	13	112	62
Lycia hirtaria	28	65	355
Lycia isabellae	0	0	36
Lycia zonaria	0	0	113
Lycophotia molothina	4	22	9
Lycophotia porphyrea	143	184	168
Lygephila craccae	0	0	1
Lygephila pastinum	0	20	19
Lygephila viciae	0	0	111
Lymantria dispar	0	0	2
Lymantria monacha	47	132	242
Lysandra bellargus	7	21	243
Lysandra coridon	75	110	489
Macaria alternata	51	138	154
Macaria brunneata	96	128	207
Macaria carbonaria	0	0	12
Macaria fusca	3	73	115
Macaria liturata	78	86	223
Macaria notata	20	17	37
Macaria signaria	70	61	93
Macaria wauaria	0	13	171
Macdunnoughia confusa	10	64	193
Macroglossum stellatarum	51	47	602
Macrothylacia rubi	26	42	163
Malacosoma alpicola	3	0	20
Malacosoma neustria	11	105	117
Mamestra brassicae	38	36	215
Maniola jurtina	525	235	1310
Martania taeniata	18	0	0
Marumba quercus	0	0	1
Mecyna flavalis	10	23	31
Mecyna lutealis	0	1	0
Meganola albula	1	0	0
Meganola strigula	2	2	27
Melanargia galathea	201	163	451
Melanchra persicariae	70	135	281
Melanthia alaudaria	14	56	47
Melanthia procellata	33	141	384
Melitaea asteria	18	60	129
Melitaea athalia	324	377	1075
Melitaea aurelia	1	17	93
Melitaea cinxia	0	31	82
Melitaea diamina	259	307	706
Melitaea phoebe	0	109	62
Menophra abruptaria	0	0	18
Mesapamea didyma	28	43	102
Mesapamea secalis	60	65	108
Mesapamea secalis / secalella	0	0	27
Mesogona oxalina	13	59	117
Mesoleuca albicillata	44	66	184
Mesoligia furuncula	0	3	85
Mesoligia literosa	3	0	27
Mesotype didymata	0	0	5
Mesotype parallelolineata	0	0	9
Mesotype verberata	111	80	202
Metaxmeste phrygialis	49	24	73
Metaxmeste schrankiana	7	14	41
Metendothenia atropunctana	15	0	1
Miltochrista miniata	101	171	182
Mimas tiliae	22	72	197
Minoa murinata	5	43	176
Minois dryas	96	118	61
Minucia lunaris	0	0	11
Mniotype adusta	123	156	329
Mniotype satura	35	66	273
Moma alpium	24	146	109
Mompha epilobiella	0	21	2
Mompha lacteella	0	0	3
Mompha langiella	0	3	3
Mompha locupletella	0	3	2
Mompha miscella	0	0	4
Mompha propinquella	0	0	2
Mompha raschkiella	3	0	0
Mormo maura	4	3	47
Mythimna albipuncta	55	91	245
Mythimna andereggii	66	76	167
Mythimna anderreggii	0	0	1
Mythimna comma	17	74	108
Mythimna congrua	1	0	0
Mythimna conigera	21	48	263
Mythimna ferrago	57	176	273
Mythimna impura	59	134	218
Mythimna l-album	3	11	67
Mythimna pallens	12	10	37
Mythimna pudorina	34	111	58
Mythimna straminea	8	1	34
Mythimna turca	37	89	120
Mythimna unipuncta	0	5	21
Mythimna vitellina	24	13	118
Naenia typica	4	19	70
Nebula nebulata	36	50	47
Neosphaleroptera nubilana	0	0	1
Neptis rivularis	0	0	5
Noctua comes	10	63	121
Noctua fimbriata	137	128	309
Noctua interjecta	3	0	4
Noctua interjecta caliginosa	0	0	2
Noctua interposita	0	0	1
Noctua janthe	8	71	103
Noctua janthina	7	5	25
Noctua orbona	0	0	7
Noctua pronuba	213	156	639
Nola aerugula	26	30	34
Nola confusalis	21	61	103
Nola cristatula	6	2	10
Nola cucullatella	0	4	20
Nomophila noctuella	65	11	176
Nonagria typhae	2	34	22
Nothocasis sertata	1	6	150
Notocelia cynosbatella	22	4	36
Notocelia incarnatana	0	0	2
Notocelia roborana	0	5	21
Notocelia rosaecolana	1	0	5
Notocelia trimaculana	0	2	10
Notocelia uddmanniana	16	16	67
Notodonta dromedarius	183	186	341
Notodonta torva	19	49	52
Notodonta tritophus	2	72	61
Notodonta ziczac	140	208	294
Nudaria mundana	7	69	31
Nycteola asiatica	3	0	2
Nycteola degenerana	19	11	64
Nycteola revayana	6	8	67
Nymphalis antiopa	65	37	494
Nymphalis polychloros	11	14	93
Nymphula nitidulata	1	5	0
Ochlodes sylvanus	373	242	1191
Ochropacha duplaris	184	155	274
Ochropleura flammatra	0	3	6
Ochropleura musiva	3	7	63
Ochropleura plecta	209	238	716
Odezia atrata	71	30	225
Odonestis pruni	0	61	43
Odontopera bidentata	59	83	265
Odontosia carmelita	28	21	128
Oeneis glacialis	3	30	52
Olethreutes arcuella	6	14	76
Olethreutes subtilana	1	0	0
Oligia dubia	13	1	7
Oligia latruncula	40	65	179
Oligia strigilis	88	136	515
Oligia versicolor	12	33	30
Olindia schumacherana	1	0	10
Omia cymbalariae	0	0	1
Operophtera brumata	28	23	406
Operophtera fagata	0	4	123
Ophiusa tirhaca	0	0	1
Opigena polygona	0	25	101
Opisthograptis luteolata	67	110	351
Orbona fragariae	2	5	114
Orenaia alpestralis	29	8	72
Orenaia lugubralis	3	0	14
Orgyia antiqua	5	16	108
Orophia ferrugella	3	0	0
Orthonama obstipata	2	19	51
Orthonama vittata	0	2	4
Orthosia cerasi	13	99	447
Orthosia cruda	6	62	216
Orthosia gothica	61	123	617
Orthosia gracilis	1	28	140
Orthosia incerta	19	73	485
Orthosia munda	3	36	274
Orthosia opima	0	10	40
Orthosia populeti	0	5	55
Orthotaenia undulana	20	1	30
Ostrinia nubilalis	2	2	4
Ourapteryx sambucaria	2	45	104
Pachetra sagittigera	11	109	186
Pachycnemia hippocastanaria	29	146	4
Palpita vitrealis	0	0	11
Pammene albuginana	0	0	1
Pammene argyrana	0	0	1
Pammene aurana	0	1	20
Pammene aurita	1	2	9
Pammene fasciana	12	8	15
Pammene germmana	0	0	1
Pammene ochsenheimeriana	6	0	1
Pammene populana	0	9	4
Pammene regiana	1	3	20
Pammene rhediella	0	0	1
Pammene spiniana	0	0	1
Pammene splendidulana	0	0	3
Panchrysia deaurata	0	1	2
Panchrysia v-argenteum	11	22	22
Pandemis cerasana	10	9	45
Pandemis cinnamomeana	52	2	40
Pandemis corylana	31	13	48
Pandemis dumetana	10	3	5
Pandemis heparana	36	8	73
Panemeria tenebrata	5	34	122
Panolis flammea	10	10	70
Panthea coenobita	29	154	167
Papestra biren	126	62	223
Papilio machaon	140	96	714
Paradarisa consonaria	19	56	176
Paradiarsia punicea	20	110	39
Paramesia gnomana	1	2	15
Parapoynx stratiotata	31	3	46
Pararge aegeria	116	118	559
Parascotia fuliginaria	5	9	100
Parasemia plantaginis	68	123	329
Parastichtis suspecta	18	43	45
Paratalanta hyalinalis	10	8	26
Paratalanta pandalis	42	5	120
Parectropis similaria	0	0	12
Pareulype berberata	65	171	318
Parnassius apollo	31	439	645
Parnassius mnemosyne	43	188	591
Parnassius phoebus	103	190	241
Pasiphila debiliata	30	24	53
Pasiphila rectangulata	9	0	32
Patania ruralis	63	5	163
Pechipogo strigilata	9	70	85
Pelosia muscerda	69	58	54
Pelurga comitata	0	2	51
Pennithera firmata	26	15	28
Penthophera morio	1	3	6
Peribatodes rhomboidaria	6	9	142
Peribatodes secundaria	49	79	225
Pericallia matronula	6	90	46
Peridea anceps	3	23	58
Peridroma saucia	3	5	56
Perinephela lancealis	22	12	46
Periphanes delphinii	0	0	1
Perizoma affinitata	43	45	79
Perizoma albulata	86	55	282
Perizoma alchemillata	176	109	427
Perizoma bifaciata	1	0	4
Perizoma blandiata	119	85	265
Perizoma didymata	1	57	45
Perizoma flavofasciata	0	37	121
Perizoma hydrata	90	17	98
Perizoma incultaria	49	36	55
Perizoma minorata	111	94	129
Perizoma obsoletata	86	20	85
Perizoma parallelolineata	4	16	134
Perizoma taeniata	10	35	29
Petrophora chlorosata	5	41	102
Phalera bucephala	24	97	222
Phalonidia curvistrigana	0	0	1
Phalonidia gilvicomana	0	0	2
Phalonidia manniana	3	2	12
Pharmacis carna	5	37	33
Phengaris alcon	70	78	68
Phengaris alcon rebeli	0	0	5
Phengaris arion	63	43	403
Phengaris nausithous	284	83	317
Phengaris teleius	352	127	245
Pheosia gnoma	97	58	209
Pheosia tremula	22	77	132
Phiaris bipunctana	39	33	37
Phiaris helveticana	5	0	3
Phiaris metallicana	0	0	32
Phiaris micana	18	36	60
Phiaris obsoletana	3	0	9
Phiaris palustrana	5	5	25
Phiaris schulziana	28	49	21
Phiaris scoriana	3	2	9
Phiaris stibiana	0	0	6
Phiaris turfosana	0	0	1
Phiaris umbrosana	11	7	22
Phigalia pilosaria	0	1	17
Philedone gerningana	20	7	35
Philedonides lunana	0	0	8
Philereme transversata	5	11	44
Philereme vetulata	8	22	62
Phlogophora meticulosa	93	64	462
Phlogophora scita	3	42	64
Photedes captiuncula	6	3	75
Photedes minima	4	75	77
Phragmataecia castaneae	19	86	22
Phragmatobia fuliginosa	64	119	312
Phtheochroa inopiana	7	18	15
Phyllodesma tremulifolia	0	3	16
Phymatopus hecta	9	11	51
Phytometra viridaria	63	49	276
Pieris brassicae	111	93	538
Pieris bryoniae	161	209	639
Pieris mannii	0	0	54
Pieris napi	457	385	1884
Pieris rapae	396	166	1310
Pieris rapae rapae	0	0	1
Piniphila bifasciana	0	1	5
Plagodis dolabraria	25	76	201
Plagodis pulveraria	31	29	97
Platytes alpinella	4	3	4
Plebejus argus	187	181	236
Plebejus idas	36	6	332
Plemyria rubiginata	64	54	123
Plusia festucae	0	19	39
Plusia putnami	16	43	39
Poecilocampa alpina	0	5	126
Poecilocampa populi	24	38	365
Polia bombycina	39	164	166
Polia hepatica	32	35	85
Polia nebulosa	7	89	204
Polychrysia moneta	16	39	70
Polygonia c-album	135	100	808
Polymixis flavicincta	0	0	1
Polymixis xanthomista	0	21	71
Polyommatus damon	0	0	3
Polyommatus dorylas	0	3	127
Polyommatus eros	25	35	104
Polyommatus icarus	362	228	1768
Polypogon strigilata	3	0	9
Polypogon tentacularia	5	34	21
Pontia callidice	12	34	23
Pontia edusa	1	4	46
Pristerognatha fuligana	0	0	4
Pristerognatha penthinana	0	0	7
Proserpinus proserpina	0	0	10
Protolampra sobrina	14	54	50
Protschinia scutosa	0	2	11
Pseudargyrotoza conwagana	19	4	93
Pseudeustrotia candidula	0	14	1
Pseudococcyx mughiana	3	0	0
Pseudococcyx posticana	0	0	1
Pseudococcyx turionella	0	0	1
Pseudohermenias abietana	15	4	24
Pseudoips prasinana	48	146	274
Pseudopanthera macularia	33	76	363
Pseudosciaphila branderiana	0	0	11
Pseudoterpna pruinata	0	1	6
Psodos quadrifaria	65	83	288
Pterapherapteryx sexalata	52	87	105
Pterostoma palpina	56	156	295
Ptilodon capucina	111	153	423
Ptilodon cucullina	18	85	208
Ptilophora plumigera	10	18	359
Ptycholoma lecheana	10	4	17
Ptycholomoides aeriferana	0	0	45
Pungeleria capreolaria	11	17	82
Pyrausta aerealis	169	31	129
Pyrausta aurata	27	38	176
Pyrausta cingulata	40	18	29
Pyrausta coracinalis	8	10	69
Pyrausta despicata	59	5	212
Pyrausta falcatalis	2	4	20
Pyrausta nigrata	27	3	80
Pyrausta ostrinalis	3	0	10
Pyrausta porphyralis	1	0	11
Pyrausta purpuralis	163	47	237
Pyrgus alveus	0	8	181
Pyrgus andromedae	12	22	94
Pyrgus armoricanus	0	5	81
Pyrgus cacaliae	21	74	128
Pyrgus malvae	69	118	419
Pyrgus serratulae	58	61	246
Pyrgus warrenensis	31	23	129
Pyrrhia umbra	6	75	137
Retinia resinella	1	0	1
Rhagades pruni	64	96	4
Rheumaptera cervinalis	26	90	227
Rheumaptera hastata	82	20	63
Rheumaptera subhastata	18	28	78
Rhinoprora chloerata	0	0	9
Rhinoprora rectangulata	8	50	200
Rhizedra lutosa	30	38	53
Rhodometra sacraria	4	0	5
Rhodostrophia vibicaria	0	0	5
Rhopalognophos glaucinaria	128	102	314
Rhopobota myrtillana	3	25	3
Rhopobota naevana	6	3	34
Rhopobota stagnana	6	0	16
Rhyacia helvetina	16	246	50
Rhyacia lucipeta	3	10	36
Rhyacia simulans	3	6	33
Rhyacionia buoliana	20	2	2
Rhyacionia pinicolana	4	0	3
Rhyacionia pinivorana	4	0	3
Rhyparia purpurata	1	3	51
Rivula sericealis	112	137	363
Rusina ferruginea	44	132	204
Saturnia pavonia	27	28	88
Saturnia pavonia pavonia	0	0	1
Saturnia pavoniella	0	0	11
Saturnia pyri	0	0	1
Saturnia spini	0	0	1
Satyrium ilicis	0	7	9
Satyrium pruni	12	15	23
Satyrium spini	0	29	39
Satyrium w-album	7	23	69
Schoenobius gigantella	28	12	3
Schrankia costaestrigalis	10	0	1
Sciadia innuptaria	2	0	2
Sciadia tenebraria	9	30	63
Sciadia zelleraria	3	9	29
Sclerocona acutella	1	0	0
Scoliopteryx libatrix	46	98	249
Scolitantides orion	0	0	1
Scoparia ambigualis	20	20	58
Scoparia ancipitella	22	3	13
Scoparia basistrigalis	36	27	88
Scoparia gallica	2	0	0
Scoparia ingratella	6	4	9
Scoparia manifestella	15	4	6
Scoparia pyralella	11	5	37
Scoparia subfusca	2	39	49
Scopula floslactata	24	48	83
Scopula immistaria	0	4	2
Scopula immorata	3	48	252
Scopula immutata	19	35	46
Scopula incanata	70	127	275
Scopula marginepunctata	0	7	50
Scopula nigropunctata	31	82	114
Scopula ornata	27	72	254
Scopula rubiginata	0	0	3
Scopula subpunctaria	14	125	16
Scopula ternata	100	68	130
Scopula umbelaria	3	69	18
Scopula virgulata	0	6	4
Scotopteryx bipunctaria	15	92	180
Scotopteryx chenopodiata	166	77	494
Scotopteryx luridata	3	0	35
Scotopteryx moeniata	0	0	3
Selenia dentaria	78	106	343
Selenia lunularia	9	45	176
Selenia tetralunaria	34	89	315
Semioscopis avellanella	4	3	10
Semioscopis oculella	0	0	6
Semioscopis steinkellneriana	0	7	3
Semioscopis strigulana	2	4	0
Setina irrorella	106	112	293
Setina roscida	12	0	79
Shargacucullia prenanthis	0	8	42
Shargacucullia scrophulariae	0	20	50
Shargacucullia thapsiphaga	0	2	7
Shargacucullia verbasci	1	30	54
Sideridis kitti	4	3	80
Sideridis reticulata	6	34	135
Sideridis rivularis	83	121	232
Sideridis turbida	0	0	4
Siona lineata	39	69	199
Sitochroa palealis	0	2	9
Sitochroa verticalis	0	6	12
Smerinthus ocellata	4	85	144
Spaelotis ravida	0	1	2
Spargania luctuata	0	0	6
Sparganothis praecana	5	9	2
Spatalistis bifasciana	0	3	1
Speyeria aglaja	227	111	569
Sphaleroptera alpicolana	3	6	17
Sphaleroptera dentana	9	0	17
Sphaleroptera orientana	6	0	19
Sphinx ligustri	24	154	184
Sphinx pinastri	142	202	442
Spialia sertorius	0	0	51
Spilonota laricana	13	5	25
Spilonota ocellana	6	3	32
Spilosoma lubricipeda	101	191	505
Spilosoma lutea	50	147	237
Spilosoma urticae	0	0	5
Spodoptera exigua	0	1	45
Standfussiana lucernea	30	23	78
Standfussiana wiskotti	9	12	48
Staurophora celsia	0	1	1
Stauropus fagi	23	167	266
Stictea mygindiana	3	3	7
Sympistis nigrita	4	1	8
Syndemis musculana	27	16	21
Syngrapha ain	40	55	220
Syngrapha hochenwarthi	11	35	89
Syngrapha interrogationis	53	54	136
Tephronia sepiaria	0	0	1
Tethea ocularis	13	4	6
Tethea or	59	133	245
Tetheella fluctuosa	17	29	66
Thalera fimbrialis	0	10	18
Thecla betulae	3	9	108
Thera britannica	9	13	72
Thera cembrae	75	1	39
Thera cembrae mugo	1	0	2
Thera cognata	74	28	137
Thera firmata	2	15	17
Thera juniperata	3	3	102
Thera obeliscata	25	4	20
Thera variata	137	133	677
Thera vetustata	10	10	69
Theria rupicapraria	0	1	2
Thisanotia chrysonuchella	1	19	54
Tholera cespitis	0	14	181
Tholera decimalis	11	52	270
Thumatha senex	17	0	11
Thyatira batis	140	225	387
Thymelicus lineola	79	51	303
Thymelicus sylvestris	24	41	322
Tiliacea aurago	6	25	174
Tiliacea citrago	1	11	93
Timandra comae	51	84	219
Tortricodes alternella	11	19	39
Tortrix viridana	0	11	26
Trachea atriplicis	25	60	211
Trichiura crataegi	47	103	145
Trichiura crataegi crataegi	0	0	1
Trichoplusia ni	1	0	7
Trichopteryx carpinata	9	57	168
Trichopteryx polycommata	0	17	45
Trichosea ludifica	4	13	13
Triodia sylvina	4	15	132
Triphosa dubitata	80	96	250
Triphosa sabaudiata	0	52	18
Trisateles emortualis	10	38	110
Tyria jacobaeae	6	60	54
Udea alpinalis	160	4	65
Udea austriacalis	9	0	30
Udea decrepitalis	42	0	9
Udea elutalis	3	0	5
Udea ferrugalis	21	5	70
Udea fulvalis	0	0	1
Udea inquinatalis	12	3	7
Udea lutealis	158	1	135
Udea nebulalis	53	8	67
Udea olivalis	58	12	74
Udea prunalis	24	13	77
Udea rhododendronalis	0	3	20
Udea uliginosalis	159	9	124
Uresiphita gilvata	0	0	1
Utetheisa pulchella	0	0	5
Valeria jaspidea	0	0	3
Vanessa atalanta	275	88	1555
Vanessa cardui	250	104	1243
Venusia blomeri	11	62	129
Venusia cambrica	72	12	72
Watsonalla binaria	13	56	174
Watsonalla cultraria	30	59	278
Witlesia pallida	3	0	2
Xanthia gilvago	0	3	7
Xanthia icteritia	31	41	246
Xanthia ocellaris	0	4	8
Xanthia togata	6	25	172
Xanthorhoe biriviata	48	136	294
Xanthorhoe decoloraria	42	60	98
Xanthorhoe designata	68	105	215
Xanthorhoe ferrugata	78	93	483
Xanthorhoe fluctuata	142	81	398
Xanthorhoe incursata	18	20	50
Xanthorhoe montanata	233	118	470
Xanthorhoe quadrifasiata	23	20	205
Xanthorhoe spadicearia	140	92	345
Xestia alpicola	6	25	103
Xestia ashworthii	20	205	134
Xestia baja	49	146	309
Xestia castanea	18	29	3
Xestia c-nigrum	209	160	754
Xestia collina	3	9	31
Xestia ditrapezium	37	133	262
Xestia lorezi	0	0	77
Xestia ochreago	0	3	43
Xestia rhaetica	9	3	16
Xestia sexstrigata	0	0	8
Xestia sincera	0	0	1
Xestia speciosa	55	20	155
Xestia stigmatica	24	70	181
Xestia triangulum	33	89	213
Xestia xanthographa	5	29	65
Xylena exsoleta	0	0	34
Xylena solidaginis	0	0	1
Xylena vetusta	6	24	204
Zeiraphera griseana	40	20	84
Zeiraphera isertana	0	0	33
Zeiraphera ratzeburgiana	0	1	2
Zeiraphera rufimitrana	3	3	20
Zeuzera pyrina	13	35	68
Zygaena angelicae	7	14	73
Zygaena ephialtes	0	0	18
Zygaena exulans	52	165	192
Zygaena filipendulae	115	185	532
Zygaena lonicerae	4	22	181
Zygaena loti	14	26	163
Zygaena minos	0	0	33
Zygaena osterodensis	0	0	99
Zygaena purpuralis	42	101	337
Zygaena transalpina	0	8	53
Zygaena viciae	22	45	229

## Sheet: A3
Functional trait expression determines contrasting temporal trends of Lepidoptera inside and outside protected areas
Table A3. Traits of 1,595 butterfly and macromoth species
Species	Family	Minimum wing length	Maximum wing length	Mean wing length	Minimum dry weight	Maximum dry weight	Mean dry weight	Number of larval host plants	Phagy	Number of habitat types	Main habitat type	Dispersion				Species	Mean_dry_weight	Number_of_larval_host_plants	Number_of_habitat_types
Abraxas_grossulariatus	Geometridae	38	50	44	106.401	215.346	160.874	40	polyphagous	2	Forest	dispersive				Abraxas_grossulariatus	160.874	40	2
Abraxas_sylvata	Geometridae	17.5	22.5	20	14.516	27.6847	21.1004	3	oligophagous	2	Forest	intermediate				Abraxas_sylvata	21.1004	3	2
Abrostola_asclepiadis	Noctuidae	30	40	35	116.021	192.377	154.199	6	polyphagous	2	Open_landscape	intermediate				Abrostola_asclepiadis	154.199	6	2
Abrostola_tripartita	Noctuidae	15	20	17.5	34.3072	56.8856	45.5964	1	monophagous	2	Open_landscape	intermediate				Abrostola_tripartita	45.5964	1	2
Abrostola_triplasia	Noctuidae	15	20	17.5	34.3072	56.8856	45.5964	2	oligophagous	3	Open_landscape	intermediate				Abrostola_triplasia	45.5964	2	3
Acasis_appensata	Geometridae	28	36	32	48.5548	92.6028	70.5788	6	polyphagous	2	Forest	intermediate				Acasis_appensata	70.5788	6	2
Acasis_viretata	Geometridae	14	17	15.5	8.1825	13.4743	10.8284	11	polyphagous	2	Forest	intermediate				Acasis_viretata	10.8284	11	2
Acentria_ephemerella	Crambidae	15	24	19.5	13.2307	49.3309	31.2808	10	polyphagous	1	Open_landscape	dispersive				Acentria_ephemerella	31.2808	10	1
Acherontia_atropos	Sphingidae	45	65	55	744.323	2289.85	1517.09	1	monophagous	3	Open_landscape	dispersive				Acherontia_atropos	1517.09	1	3
Achlya_flavicornis	Drepanidae	15	20	17.5	26.1166	62.8608	44.4887	2	oligophagous	3	Forest	intermediate				Achlya_flavicornis	44.4887	2	3
Acleris_abietana	Tortricidae	18	23	20.5	22.044	43.7891	32.9165	2	oligophagous	1	Forest	intermediate				Acleris_abietana	32.9165	2	1
Acleris_aspersana	Tortricidae	16	22	19	15.8513	38.6644	27.2578	4	oligophagous	2	Forest	intermediate				Acleris_aspersana	27.2578	4	2
Acleris_bergmanniana	Tortricidae	17	22	19.5	18.7838	38.6644	28.7241	2	oligophagous	2	Forest	sedentary				Acleris_bergmanniana	28.7241	2	2
Acleris_cristana	Tortricidae	17	24	20.5	18.7838	49.3309	34.0574	5	oligophagous	2	Forest	sedentary				Acleris_cristana	34.0574	5	2
Acleris_emargana	Tortricidae	20	25	22.5	29.6082	55.3044	42.4563	3	oligophagous	2	Forest	intermediate				Acleris_emargana	42.4563	3	2
Acleris_ferrugana	Tortricidae	16	23	19.5	15.8513	43.7891	29.8202	4	oligophagous	2	Forest	intermediate				Acleris_ferrugana	29.8202	4	2
Acleris_forskaleana	Tortricidae	18	24	21	22.044	49.3309	35.6875	2	oligophagous	2	Forest	intermediate				Acleris_forskaleana	35.6875	2	2
Acleris_hastiana	Tortricidae	14	20	17	10.9065	29.6082	20.2573	6	polyphagous	2	Forest	intermediate				Acleris_hastiana	20.2573	6	2
Acleris_holmiana	Tortricidae	19	25	22	25.6471	55.3044	40.4757	3	oligophagous	2	Forest	intermediate				Acleris_holmiana	40.4757	3	2
Acleris_hyemana	Tortricidae	18	24	21	22.044	49.3309	35.6875	2	oligophagous	2	Forest	intermediate				Acleris_hyemana	35.6875	2	2
Acleris_kochiella	Tortricidae	16	21	18.5	15.8513	33.9423	24.8968	1	monophagous	2	Forest	sedentary				Acleris_kochiella	24.8968	1	2
Acleris_laterana	Tortricidae	16	22	19	15.8513	38.6644	27.2578	5	oligophagous	2	Forest	intermediate				Acleris_laterana	27.2578	5	2
Acleris_literana	Tortricidae	16	21	18.5	15.8513	33.9423	24.8968	4	oligophagous	2	Forest	intermediate				Acleris_literana	24.8968	4	2
Acleris_logiana	Tortricidae	16	22	19	15.8513	38.6644	27.2578	2	oligophagous	2	Forest	sedentary				Acleris_logiana	27.2578	2	2
Acleris_lorquiniana	Tortricidae	18	22	20	22.044	38.6644	30.3542	2	oligophagous	2	Forest	sedentary				Acleris_lorquiniana	30.3542	2	2
Acleris_maccana	Tortricidae	18	23	20.5	22.044	43.7891	32.9165	2	oligophagous	2	Forest	intermediate				Acleris_maccana	32.9165	2	2
Acleris_notana	Tortricidae	13	17	15	8.86276	18.7838	13.8233	3	oligophagous	2	Forest	intermediate				Acleris_notana	13.8233	3	2
Acleris_rhombana	Tortricidae	15	19	17	13.2307	25.6471	19.4389	4	oligophagous	2	Forest	intermediate				Acleris_rhombana	19.4389	4	2
Acleris_rufana	Tortricidae	13	17	15	8.86276	18.7838	13.8233	2	oligophagous	2	Forest	intermediate				Acleris_rufana	13.8233	2	2
Acleris_schalleriana	Tortricidae	18	25	21.5	22.044	55.3044	38.6742	3	oligophagous	2	Forest	sedentary				Acleris_schalleriana	38.6742	3	2
Acleris_sparsana	Tortricidae	18	24	21	22.044	49.3309	35.6875	4	oligophagous	2	Forest	intermediate				Acleris_sparsana	35.6875	4	2
Acleris_umbrana	Tortricidae	20	26	23	29.6082	61.7238	45.666	2	oligophagous	2	Forest	sedentary				Acleris_umbrana	45.666	2	2
Acleris_variegana	Tortricidae	14	18	16	10.9065	22.044	16.4753	6	polyphagous	2	Forest	intermediate				Acleris_variegana	16.4753	6	2
Acontia_lucida	Noctuidae	12.5	16	14.25	24.9	38.4285	31.6643	ND	oligophagous	2	Open_landscape	intermediate				Acontia_lucida	31.6643	10	2
Acronicta_aceris	Noctuidae	17.5	22.5	20	44.9846	69.971	57.4778	11	polyphagous	2	Forest	intermediate				Acronicta_aceris	57.4778	11	2
Acronicta_alni	Noctuidae	17.5	22.5	20	44.9846	69.971	57.4778	20	polyphagous	3	Forest	intermediate				Acronicta_alni	57.4778	20	3
Acronicta_auricoma	Noctuidae	17.5	22.5	20	44.9846	69.971	57.4778	ND	oligophagous	1	Both	intermediate				Acronicta_auricoma	57.4778	10	1
Acronicta_cuspis	Noctuidae	35	45	40	152.13	236.629	194.38	4	oligophagous	2	Forest	intermediate				Acronicta_cuspis	194.38	4	2
Acronicta_euphorbiae	Noctuidae	35	45	40	152.13	236.629	194.38	2	oligophagous	3	Open_landscape	intermediate				Acronicta_euphorbiae	194.38	2	3
Acronicta_leporina	Noctuidae	17.5	22.5	20	44.9846	69.971	57.4778	10	polyphagous	3	Forest	intermediate				Acronicta_leporina	57.4778	10	3
Acronicta_megacephala	Noctuidae	35	45	40	152.13	236.629	194.38	5	oligophagous	2	Forest	intermediate				Acronicta_megacephala	194.38	5	2
Acronicta_menyanthidis	Noctuidae	17.5	22.5	20	44.9846	69.971	57.4778	15	polyphagous	2	Open_landscape	intermediate				Acronicta_menyanthidis	57.4778	15	2
Acronicta_psi	Noctuidae	17.5	22.5	20	44.9846	69.971	57.4778	18	polyphagous	2	Both	intermediate				Acronicta_psi	57.4778	18	2
Acronicta_rumicis	Noctuidae	17.5	22.5	20	44.9846	69.971	57.4778	2	oligophagous	4	Open_landscape	intermediate				Acronicta_rumicis	57.4778	2	4
Acronicta_strigosa	Noctuidae	17.5	22.5	20	44.9846	69.971	57.4778	ND	oligophagous	2	Forest	intermediate				Acronicta_strigosa	57.4778	10	2
Actebia_praecox	Noctuidae	15	20	17.5	34.3072	56.8856	45.5964	9	polyphagous	1	Open_landscape	intermediate				Actebia_praecox	45.5964	9	1
Actinotia_polyodon	Noctuidae	15	20	17.5	34.3072	56.8856	45.5964	ND	oligophagous	2	Open_landscape	intermediate				Actinotia_polyodon	45.5964	10	2
Adoxophyes_orana	Tortricidae	18	25	21.5	22.044	55.3044	38.6742	6	polyphagous	2	Both	intermediate				Adoxophyes_orana	38.6742	6	2
Adscita_geryon	Zygaenidae	11.5	13.5	12.5	11.6151	18.9523	15.2837	1	monophagous	1	Open_landscape	sedentary				Adscita_geryon	15.2837	1	1
Adscita_statices	Zygaenidae	12.5	15	13.75	14.983	26.1449	20.564	2	oligophagous	3	Open_landscape	sedentary				Adscita_statices	20.564	2	3
Aedia_funesta	Noctuidae	15	20	17.5	34.3072	56.8856	45.5964	2	oligophagous	2	Open_landscape	intermediate				Aedia_funesta	45.5964	2	2
Aethalura_punctulata	Geometridae	12.5	16	14.25	6.11568	11.531	8.82334	4	oligophagous	2	Forest	intermediate				Aethalura_punctulata	8.82334	4	2
Aetheria_bicolorata	Noctuidae	22	26	24	67.2609	90.2177	78.7393	2	oligophagous	2	Open_landscape	intermediate				Aetheria_bicolorata	78.7393	2	2
Aetheria_dysodea	Noctuidae	18	22	20	47.2683	67.2609	57.2646	2	oligophagous	2	Open_landscape	intermediate				Aetheria_dysodea	57.2646	2	2
Aethes_aurofasciana	Tortricidae	15	20	17.5	13.2307	29.6082	21.4194	2	oligophagous	2	Open_landscape	intermediate				Aethes_aurofasciana	21.4194	2	2
Aethes_cnicana	Tortricidae	14	20	17	10.9065	29.6082	20.2573	2	oligophagous	2	Open_landscape	intermediate				Aethes_cnicana	20.2573	2	2
Aethes_decimana	Tortricidae	14	20	17	10.9065	29.6082	20.2573	2	oligophagous	2	Open_landscape	intermediate				Aethes_decimana	20.2573	2	2
Aethes_hartmanniana	Tortricidae	14	20	17	10.9065	29.6082	20.2573	2	oligophagous	2	Open_landscape	intermediate				Aethes_hartmanniana	20.2573	2	2
Aethes_rubigana	Tortricidae	14	20	17	10.9065	29.6082	20.2573	2	oligophagous	2	Open_landscape	intermediate				Aethes_rubigana	20.2573	2	2
Aethes_smeathmanniana	Tortricidae	14	20	17	10.9065	29.6082	20.2573	3	oligophagous	2	Open_landscape	intermediate				Aethes_smeathmanniana	20.2573	3	2
Aethes_tesserana	Tortricidae	14	20	17	10.9065	29.6082	20.2573	2	oligophagous	2	Open_landscape	intermediate				Aethes_tesserana	20.2573	2	2
Agapeta_hamana	Tortricidae	16	22	19	15.8513	38.6644	27.2578	2	oligophagous	2	Open_landscape	intermediate				Agapeta_hamana	27.2578	2	2
Agapeta_zoegana	Tortricidae	16	22	19	15.8513	38.6644	27.2578	1	monophagous	2	Open_landscape	intermediate				Agapeta_zoegana	27.2578	1	2
Aglais_io	Nymphalidae	50	65	57.5	564.09	1160.63	862.359	1	monophagous	3	Both	dispersive				Aglais_io	862.359	1	3
Aglais_urticae	Nymphalidae	40	55	47.5	305.384	733.126	519.255	2	oligophagous	3	Both	dispersive				Aglais_urticae	519.255	2	3
Aglia_tau	Saturniidae	60	85	72.5	1807.72	5244.54	3526.13	20	polyphagous	2	Forest	intermediate				Aglia_tau	3526.13	20	2
Agonopterix_alpigena	Depressariidae	16	22	19	15.8513	38.6644	27.2578	3	oligophagous	3	Open_landscape	intermediate				Agonopterix_alpigena	27.2578	3	3
Agonopterix_alstromeriana	Depressariidae	18	25	21.5	22.044	55.3044	38.6742	5	oligophagous	2	Open_landscape	intermediate				Agonopterix_alstromeriana	38.6742	5	2
Agonopterix_angelicella	Depressariidae	16	22	19	15.8513	38.6644	27.2578	6	polyphagous	2	Open_landscape	intermediate				Agonopterix_angelicella	27.2578	6	2
Agonopterix_arenella	Depressariidae	19	27	23	25.6471	68.6035	47.1253	6	polyphagous	2	Open_landscape	intermediate				Agonopterix_arenella	47.1253	6	2
Agonopterix_assimilella	Depressariidae	18	24	21	22.044	49.3309	35.6875	6	polyphagous	2	Open_landscape	intermediate				Agonopterix_assimilella	35.6875	6	2
Agonopterix_astrantiae	Depressariidae	16	22	19	15.8513	38.6644	27.2578	3	oligophagous	3	Open_landscape	sedentary				Agonopterix_astrantiae	27.2578	3	3
Agonopterix_capreolella	Depressariidae	16	22	19	15.8513	38.6644	27.2578	6	polyphagous	2	Open_landscape	intermediate				Agonopterix_capreolella	27.2578	6	2
Agonopterix_carduella	Depressariidae	18	26	22	22.044	61.7238	41.8839	6	polyphagous	2	Open_landscape	intermediate				Agonopterix_carduella	41.8839	6	2
Agonopterix_ciliella	Depressariidae	18	24	21	22.044	49.3309	35.6875	6	polyphagous	2	Open_landscape	intermediate				Agonopterix_ciliella	35.6875	6	2
Agonopterix_conterminella	Depressariidae	20	26	23	29.6082	61.7238	45.666	6	polyphagous	2	Open_landscape	sedentary				Agonopterix_conterminella	45.666	6	2
Agonopterix_doronicella	Depressariidae	16	22	19	15.8513	38.6644	27.2578	3	oligophagous	3	Open_landscape	sedentary				Agonopterix_doronicella	27.2578	3	3
Agonopterix_heracliana	Depressariidae	18	26	22	22.044	61.7238	41.8839	15	polyphagous	2	Open_landscape	intermediate				Agonopterix_heracliana	41.8839	15	2
Agonopterix_hypericella	Depressariidae	18	24	21	22.044	49.3309	35.6875	6	polyphagous	2	Open_landscape	intermediate				Agonopterix_hypericella	35.6875	6	2
Agonopterix_kaekeritziana	Depressariidae	16	24	20	15.8513	49.3309	32.5911	6	polyphagous	2	Open_landscape	intermediate				Agonopterix_kaekeritziana	32.5911	6	2
Agonopterix_laterella	Depressariidae	17	23	20	18.7838	43.7891	31.2864	6	polyphagous	2	Open_landscape	intermediate				Agonopterix_laterella	31.2864	6	2
Agonopterix_liturosa	Depressariidae	18	26	22	22.044	61.7238	41.8839	6	polyphagous	2	Open_landscape	intermediate				Agonopterix_liturosa	41.8839	6	2
Agonopterix_ocellana	Depressariidae	19	27	23	25.6471	68.6035	47.1253	30	polyphagous	2	Open_landscape	intermediate				Agonopterix_ocellana	47.1253	30	2
Agonopterix_pallorella	Depressariidae	20	26	23	29.6082	61.7238	45.666	6	polyphagous	2	Open_landscape	intermediate				Agonopterix_pallorella	45.666	6	2
Agonopterix_parilella	Depressariidae	18	24	21	22.044	49.3309	35.6875	6	polyphagous	2	Open_landscape	intermediate				Agonopterix_parilella	35.6875	6	2
Agonopterix_petasitis	Depressariidae	18	26	22	22.044	61.7238	41.8839	3	oligophagous	3	Open_landscape	sedentary				Agonopterix_petasitis	41.8839	3	3
Agonopterix_propinquella	Depressariidae	18	24	21	22.044	49.3309	35.6875	6	polyphagous	2	Open_landscape	intermediate				Agonopterix_propinquella	35.6875	6	2
Agonopterix_purpurea	Depressariidae	18	24	21	22.044	49.3309	35.6875	6	polyphagous	2	Open_landscape	intermediate				Agonopterix_purpurea	35.6875	6	2
Agonopterix_senecionis	Depressariidae	18	25	21.5	22.044	55.3044	38.6742	6	polyphagous	2	Open_landscape	intermediate				Agonopterix_senecionis	38.6742	6	2
Agonopterix_silerella	Depressariidae	18	24	21	22.044	49.3309	35.6875	3	oligophagous	3	Open_landscape	sedentary				Agonopterix_silerella	35.6875	3	3
Agonopterix_yeatiana	Depressariidae	19	25	22	25.6471	55.3044	40.4757	6	polyphagous	2	Open_landscape	intermediate				Agonopterix_yeatiana	40.4757	6	2
Agriades_glandon	Lycaenidae	22	28	25	46.3864	86.8365	66.6114	2	oligophagous	3	Open_landscape	sedentary				Agriades_glandon	66.6114	2	3
Agriades_optilete	Lycaenidae	22	30	26	46.3864	103.898	75.1421	1	monophagous	3	Open_landscape	sedentary				Agriades_optilete	75.1421	1	3
Agriades_orbitulus	Lycaenidae	22	30	26	46.3864	103.898	75.1421	1	monophagous	3	Open_landscape	sedentary				Agriades_orbitulus	75.1421	1	3
Agriopis_aurantiaria	Geometridae	15	20	17.5	9.76925	20.4564	15.1128	20	polyphagous	2	Forest	intermediate				Agriopis_aurantiaria	15.1128	20	2
Agriopis_bajaria	Geometridae	28	35	31.5	48.5548	86.1378	67.3463	20	polyphagous	2	Forest	intermediate				Agriopis_bajaria	67.3463	20	2
Agriopis_leucophaearia	Geometridae	15	20	17.5	9.76925	20.4564	15.1128	2	oligophagous	1	Forest	intermediate				Agriopis_leucophaearia	15.1128	2	1
Agriopis_marginaria	Geometridae	15	20	17.5	9.76925	20.4564	15.1128	20	polyphagous	3	Forest	intermediate				Agriopis_marginaria	15.1128	20	3
Agriphila_inquinatella	Crambidae	20	26	23	29.6082	61.7238	45.666	15	polyphagous	2	Open_landscape	intermediate				Agriphila_inquinatella	45.666	15	2
Agriphila_selasella	Crambidae	20	28	24	29.6082	75.9574	52.7828	15	polyphagous	2	Open_landscape	intermediate				Agriphila_selasella	52.7828	15	2
Agriphila_straminella	Crambidae	18	25	21.5	22.044	55.3044	38.6742	20	polyphagous	2	Open_landscape	intermediate				Agriphila_straminella	38.6742	20	2
Agriphila_tristella	Crambidae	20	28	24	29.6082	75.9574	52.7828	20	polyphagous	2	Open_landscape	intermediate				Agriphila_tristella	52.7828	20	2
Agrius_convolvuli	Sphingidae	40	60	50	519.325	1792.97	1156.15	2	oligophagous	3	Open_landscape	dispersive				Agrius_convolvuli	1156.15	2	3
Agrochola_circellaris	Noctuidae	17.5	22.5	20	44.9846	69.971	57.4778	7	polyphagous	2	Forest	intermediate				Agrochola_circellaris	57.4778	7	2
Agrochola_helvola	Noctuidae	17.5	22.5	20	44.9846	69.971	57.4778	9	polyphagous	3	Forest	intermediate				Agrochola_helvola	57.4778	9	3
Agrochola_litura	Noctuidae	17.5	22.5	20	44.9846	69.971	57.4778	12	polyphagous	3	Forest	intermediate				Agrochola_litura	57.4778	12	3
Agrochola_lota	Noctuidae	17.5	22.5	20	44.9846	69.971	57.4778	1	monophagous	3	Forest	intermediate				Agrochola_lota	57.4778	1	3
Agrochola_lychnidis	Noctuidae	17.5	22.5	20	44.9846	69.971	57.4778	11	polyphagous	3	Forest	intermediate				Agrochola_lychnidis	57.4778	11	3
Agrochola_macilenta	Noctuidae	17.5	22.5	20	44.9846	69.971	57.4778	8	polyphagous	3	Forest	intermediate				Agrochola_macilenta	57.4778	8	3
Agrochola_nitida	Noctuidae	35	45	40	152.13	236.629	194.38	20	polyphagous	2	Forest	intermediate				Agrochola_nitida	194.38	20	2
Agrotera_nemoralis	Crambidae	20	25	22.5	29.6082	55.3044	42.4563	5	oligophagous	2	Open_landscape	intermediate				Agrotera_nemoralis	42.4563	5	2
Agrotis_cinerea	Noctuidae	17.5	22.5	20	44.9846	69.971	57.4778	1	monophagous	1	Open_landscape	intermediate				Agrotis_cinerea	57.4778	1	1
Agrotis_clavis	Noctuidae	17.5	22.5	20	44.9846	69.971	57.4778	6	polyphagous	3	Open_landscape	intermediate				Agrotis_clavis	57.4778	6	3
Agrotis_exclamationis	Noctuidae	17.5	22.5	20	44.9846	69.971	57.4778	5	oligophagous	3	Open_landscape	intermediate				Agrotis_exclamationis	57.4778	5	3
Agrotis_fatidica	Noctuidae	35	45	40	152.13	236.629	194.38	2	oligophagous	3	Open_landscape	sedentary				Agrotis_fatidica	194.38	2	3
Agrotis_ipsilon	Noctuidae	17.5	25	21.25	44.9846	84.2075	64.5961	ND	oligophagous	3	Open_landscape	dispersive				Agrotis_ipsilon	64.5961	5	3
Agrotis_segetum	Noctuidae	17.5	22.5	20	44.9846	69.971	57.4778	4	oligophagous	3	Open_landscape	dispersive				Agrotis_segetum	57.4778	4	3
Agrotis_simplonia	Noctuidae	35	45	40	152.13	236.629	194.38	1	monophagous	3	Open_landscape	sedentary				Agrotis_simplonia	194.38	1	3
Albocosta_musiva	Noctuidae	30	40	35	116.021	192.377	154.199	20	polyphagous	2	Open_landscape	intermediate				Albocosta_musiva	154.199	20	2
Alcis_bastelbergeri	Geometridae	30	40	35	57.9706	121.388	89.6792	20	polyphagous	2	Forest	intermediate				Alcis_bastelbergeri	89.6792	20	2
Alcis_deversata	Geometridae	30	40	35	57.9706	121.388	89.6792	20	polyphagous	2	Forest	intermediate				Alcis_deversata	89.6792	20	2
Alcis_jubata	Geometridae	15	20	17.5	9.76925	20.4564	15.1128	1	monophagous	2	Forest	intermediate				Alcis_jubata	15.1128	1	2
Alcis_repandata	Geometridae	15	22.5	18.75	9.76925	27.6847	18.727	20	polyphagous	4	Forest	intermediate				Alcis_repandata	18.727	20	4
Aleimma_loeflingiana	Tortricidae	34	42	38	130.818	236.388	183.603	2	oligophagous	2	Forest	intermediate				Aleimma_loeflingiana	183.603	2	2
Algedonia_terrealis	Crambidae	18	22	20	22.044	38.6644	30.3542	6	polyphagous	2	Open_landscape	intermediate				Algedonia_terrealis	30.3542	6	2
Allophyes_oxyacanthae	Noctuidae	17.5	22.5	20	44.9846	69.971	57.4778	10	polyphagous	2	Forest	intermediate				Allophyes_oxyacanthae	57.4778	10	2
Alsophila_aescularia	Geometridae	15	20	17.5	9.76925	20.4564	15.1128	20	polyphagous	2	Forest	sedentary				Alsophila_aescularia	15.1128	20	2
Amata_phegea	Erebidae	30	40	35	104	211.401	157.701	20	polyphagous	3	Open_landscape	intermediate				Amata_phegea	157.701	20	3
Ammoconia_caecimacula	Noctuidae	35	45	40	152.13	236.629	194.38	20	polyphagous	2	Open_landscape	intermediate				Ammoconia_caecimacula	194.38	20	2
Amphipoea_fucosa	Noctuidae	15	20	17.5	34.3072	56.8856	45.5964	1	monophagous	2	Open_landscape	intermediate				Amphipoea_fucosa	45.5964	1	2
Amphipoea_lucens	Noctuidae	15	20	17.5	34.3072	56.8856	45.5964	2	oligophagous	1	Both	intermediate				Amphipoea_lucens	45.5964	2	1
Amphipoea_oculea	Noctuidae	15	20	17.5	34.3072	56.8856	45.5964	3	oligophagous	4	Open_landscape	intermediate				Amphipoea_oculea	45.5964	3	4
Amphipyra_berbera	Noctuidae	20	25	22.5	56.8856	84.2075	70.5465	10	polyphagous	2	Forest	intermediate				Amphipyra_berbera	70.5465	10	2
Amphipyra_livida	Noctuidae	35	45	40	152.13	236.629	194.38	4	oligophagous	2	Forest	intermediate				Amphipyra_livida	194.38	4	2
Amphipyra_perflua	Noctuidae	40	55	47.5	192.377	336.714	264.545	3	oligophagous	2	Forest	intermediate				Amphipyra_perflua	264.545	3	2
Amphipyra_pyramidea	Noctuidae	20	27.5	23.75	56.8856	99.5659	78.2258	15	polyphagous	2	Forest	intermediate				Amphipyra_pyramidea	78.2258	15	2
Amphipyra_tragopoginis	Noctuidae	20	27.5	23.75	56.8856	99.5659	78.2258	18	polyphagous	3	Forest	intermediate				Amphipyra_tragopoginis	78.2258	18	3
Anania_coronata	Crambidae	23	28	25.5	43.7891	75.9574	59.8732	5	oligophagous	2	Open_landscape	intermediate				Anania_coronata	59.8732	5	2
Anania_crocealis	Crambidae	22	26	24	38.6644	61.7238	50.1941	6	polyphagous	2	Open_landscape	intermediate				Anania_crocealis	50.1941	6	2
Anania_funebris	Crambidae	22	28	25	38.6644	75.9574	57.3109	3	oligophagous	2	Open_landscape	intermediate				Anania_funebris	57.3109	3	2
Anania_fuscalis	Crambidae	18	26	22	22.044	61.7238	41.8839	3	oligophagous	2	Open_landscape	intermediate				Anania_fuscalis	41.8839	3	2
Anania_hortulata	Crambidae	20	30	25	29.6082	92.144	60.8761	30	polyphagous	2	Open_landscape	intermediate				Anania_hortulata	60.8761	30	2
Anania_lancealis	Crambidae	20	26	23	29.6082	61.7238	45.666	5	oligophagous	2	Open_landscape	intermediate				Anania_lancealis	45.666	5	2
Anania_stachydalis	Crambidae	22	27	24.5	38.6644	68.6035	53.6339	3	oligophagous	2	Open_landscape	intermediate				Anania_stachydalis	53.6339	3	2
Anania_verbascalis	Crambidae	20	26	23	29.6082	61.7238	45.666	3	oligophagous	2	Open_landscape	intermediate				Anania_verbascalis	45.666	3	2
Anaplectoides_prasina	Noctuidae	17.5	22.5	20	44.9846	69.971	57.4778	10	polyphagous	3	Forest	intermediate				Anaplectoides_prasina	57.4778	10	3
Anarta_melanopa	Noctuidae	12.5	16	14.25	24.9	38.4285	31.6643	4	oligophagous	2	Open_landscape	sedentary				Anarta_melanopa	31.6643	4	2
Anarta_myrtilli	Noctuidae	12.5	16	14.25	24.9	38.4285	31.6643	2	oligophagous	2	Open_landscape	sedentary				Anarta_myrtilli	31.6643	2	2
Anarta_odontites	Noctuidae	25	32	28.5	84.2075	129.958	107.083	3	oligophagous	3	Open_landscape	sedentary				Anarta_odontites	107.083	3	3
Ancylis_achatana	Tortricidae	14	20	17	10.9065	29.6082	20.2573	2	oligophagous	2	Forest	intermediate				Ancylis_achatana	20.2573	2	2
Ancylis_apicella	Tortricidae	14	20	17	10.9065	29.6082	20.2573	2	oligophagous	2	Forest	intermediate				Ancylis_apicella	20.2573	2	2
Ancylis_badiana	Tortricidae	12	17	14.5	7.08329	18.7838	12.9336	3	oligophagous	2	Forest	intermediate				Ancylis_badiana	12.9336	3	2
Ancylis_comptana	Tortricidae	12	17	14.5	7.08329	18.7838	12.9336	3	oligophagous	2	Forest	intermediate				Ancylis_comptana	12.9336	3	2
Ancylis_diminutana	Tortricidae	11	15	13	5.55171	13.2307	9.39121	2	oligophagous	2	Forest	intermediate				Ancylis_diminutana	9.39121	2	2
Ancylis_geminana	Tortricidae	14	18	16	10.9065	22.044	16.4753	2	oligophagous	2	Forest	intermediate				Ancylis_geminana	16.4753	2	2
Ancylis_laetana	Tortricidae	14	20	17	10.9065	29.6082	20.2573	2	oligophagous	2	Forest	intermediate				Ancylis_laetana	20.2573	2	2
Ancylis_mitterbacheriana	Tortricidae	14	20	17	10.9065	29.6082	20.2573	1	monophagous	3	Forest	sedentary				Ancylis_mitterbacheriana	20.2573	1	3
Ancylis_myrtillana	Tortricidae	12	17	14.5	7.08329	18.7838	12.9336	1	monophagous	3	Forest	sedentary				Ancylis_myrtillana	12.9336	1	3
Ancylis_obtusana	Tortricidae	12	16	14	7.08329	15.8513	11.4673	2	oligophagous	2	Forest	intermediate				Ancylis_obtusana	11.4673	2	2
Ancylis_subarcuana	Tortricidae	13	17	15	8.86276	18.7838	13.8233	2	oligophagous	2	Forest	intermediate				Ancylis_subarcuana	13.8233	2	2
Ancylis_tineana	Tortricidae	12	17	14.5	7.08329	18.7838	12.9336	2	oligophagous	2	Forest	intermediate				Ancylis_tineana	12.9336	2	2
Ancylis_uncella	Tortricidae	14	20	17	10.9065	29.6082	20.2573	2	oligophagous	2	Forest	intermediate				Ancylis_uncella	20.2573	2	2
Ancylis_unculana	Tortricidae	13	17	15	8.86276	18.7838	13.8233	2	oligophagous	2	Forest	intermediate				Ancylis_unculana	13.8233	2	2
Ancylis_unguicella	Tortricidae	14	20	17	10.9065	29.6082	20.2573	2	oligophagous	2	Forest	intermediate				Ancylis_unguicella	20.2573	2	2
Ancylis_upupana	Tortricidae	14	19	16.5	10.9065	25.6471	18.2768	2	oligophagous	2	Forest	intermediate				Ancylis_upupana	18.2768	2	2
Angerona_prunaria	Geometridae	20	27.5	23.75	20.4564	46.3584	33.4074	11	polyphagous	2	Forest	intermediate				Angerona_prunaria	33.4074	11	2
Anorthoa_munda	Noctuidae	17	21	19	42.7499	61.9796	52.3647	13	polyphagous	1	Forest	intermediate				Anorthoa_munda	52.3647	13	1
Anthocharis_cardamines	Pieridae	35	45	40	132.809	261.768	197.288	2	oligophagous	4	Open_landscape	intermediate				Anthocharis_cardamines	197.288	2	4
Anticlea_badiata	Geometridae	24	30	27	32.6773	57.9706	45.3239	6	polyphagous	2	Open_landscape	intermediate				Anticlea_badiata	45.3239	6	2
Anticlea_derivata	Geometridae	12.5	16	14.25	6.11568	11.531	8.82334	5	oligophagous	2	Forest	intermediate				Anticlea_derivata	8.82334	5	2
Anticollix_sparsata	Geometridae	11	14	12.5	4.40373	8.1825	6.29311	1	monophagous	3	Forest	intermediate				Anticollix_sparsata	6.29311	1	3
Antitype_chi	Noctuidae	17.5	22.5	20	44.9846	69.971	57.4778	14	polyphagous	2	Open_landscape	intermediate				Antitype_chi	57.4778	14	2
Apamea_anceps	Noctuidae	17.5	22.5	20	44.9846	69.971	57.4778	5	oligophagous	2	Open_landscape	intermediate				Apamea_anceps	57.4778	5	2
Apamea_aquila	Noctuidae	35	45	40	152.13	236.629	194.38	2	oligophagous	3	Open_landscape	sedentary				Apamea_aquila	194.38	2	3
Apamea_crenata	Noctuidae	17.5	22.5	20	44.9846	69.971	57.4778	3	oligophagous	4	Open_landscape	intermediate				Apamea_crenata	57.4778	3	4
Apamea_epomidion	Noctuidae	17.5	22.5	20	44.9846	69.971	57.4778	4	oligophagous	2	Open_landscape	sedentary				Apamea_epomidion	57.4778	4	2
Apamea_furva	Noctuidae	17.5	22.5	20	44.9846	69.971	57.4778	3	oligophagous	2	Open_landscape	sedentary				Apamea_furva	57.4778	3	2
Apamea_illyria	Noctuidae	35	45	40	152.13	236.629	194.38	2	oligophagous	3	Open_landscape	sedentary				Apamea_illyria	194.38	2	3
Apamea_lateritia	Noctuidae	17.5	22.5	20	44.9846	69.971	57.4778	ND	oligophagous	2	Open_landscape	intermediate				Apamea_lateritia	57.4778	6	2
Apamea_lithoxylaea	Noctuidae	17.5	22.5	20	44.9846	69.971	57.4778	2	oligophagous	3	Open_landscape	intermediate				Apamea_lithoxylaea	57.4778	2	3
Apamea_maillardi	Noctuidae	35	45	40	152.13	236.629	194.38	1	monophagous	3	Open_landscape	sedentary				Apamea_maillardi	194.38	1	3
Apamea_monoglypha	Noctuidae	17.5	25	21.25	44.9846	84.2075	64.5961	3	oligophagous	4	Open_landscape	intermediate				Apamea_monoglypha	64.5961	3	4
Apamea_platinea	Noctuidae	35	45	40	152.13	236.629	194.38	2	oligophagous	3	Open_landscape	sedentary				Apamea_platinea	194.38	2	3
Apamea_remissa	Noctuidae	17.5	22.5	20	44.9846	69.971	57.4778	5	oligophagous	3	Forest	intermediate				Apamea_remissa	57.4778	5	3
Apamea_rubrirena	Noctuidae	35	45	40	152.13	236.629	194.38	3	oligophagous	3	Open_landscape	sedentary				Apamea_rubrirena	194.38	3	3
Apamea_scolopacina	Noctuidae	17.5	22.5	20	44.9846	69.971	57.4778	6	polyphagous	2	Forest	intermediate				Apamea_scolopacina	57.4778	6	2
Apamea_sordens	Noctuidae	17.5	22.5	20	44.9846	69.971	57.4778	4	oligophagous	3	Open_landscape	intermediate				Apamea_sordens	57.4778	4	3
Apamea_sublustris	Noctuidae	17.5	22.5	20	44.9846	69.971	57.4778	1	monophagous	1	Open_landscape	sedentary				Apamea_sublustris	57.4778	1	1
Apamea_unanimis	Noctuidae	17.5	22.5	20	44.9846	69.971	57.4778	5	oligophagous	3	Open_landscape	intermediate				Apamea_unanimis	57.4778	5	3
Apamea_zeta	Noctuidae	35	45	40	152.13	236.629	194.38	2	oligophagous	3	Open_landscape	sedentary				Apamea_zeta	194.38	2	3
Apatura_ilia	Nymphalidae	55	70	62.5	733.126	1422.99	1078.06	6	polyphagous	2	Forest	intermediate				Apatura_ilia	1078.06	6	2
Apatura_iris	Nymphalidae	60	80	70	931.316	2054.37	1492.84	4	oligophagous	3	Forest	intermediate				Apatura_iris	1492.84	4	3
Apeira_syringaria	Geometridae	15	20	17.5	9.76925	20.4564	15.1128	7	polyphagous	2	Forest	intermediate				Apeira_syringaria	15.1128	7	2
Aphantopus_hyperantus	Nymphalidae	40	50	45	305.384	564.09	434.737	7	polyphagous	3	Open_landscape	intermediate				Aphantopus_hyperantus	434.737	7	3
Aphelia_paleana	Tortricidae	18	23	20.5	22.044	43.7891	32.9165	4	oligophagous	2	Open_landscape	intermediate				Aphelia_paleana	32.9165	4	2
Aphelia_unitana	Tortricidae	17	22	19.5	18.7838	38.6644	28.7241	2	oligophagous	2	Open_landscape	intermediate				Aphelia_unitana	28.7241	2	2
Aphelia_viburnana	Tortricidae	18	23	20.5	22.044	43.7891	32.9165	4	oligophagous	2	Open_landscape	intermediate				Aphelia_viburnana	32.9165	4	2
Aplocera_efformata	Geometridae	14	17	15.5	8.1825	13.4743	10.8284	1	monophagous	3	Open_landscape	intermediate				Aplocera_efformata	10.8284	1	3
Aplocera_plagiata	Geometridae	10	13	11.5	3.44733	6.764	5.10566	1	monophagous	4	Open_landscape	intermediate				Aplocera_plagiata	5.10566	1	4
Aplocera_praeformata	Geometridae	10	13	11.5	3.44733	6.764	5.10566	ND	oligophagous	2	Open_landscape	intermediate				Aplocera_praeformata	5.10566	2	2
Aplocera_simpliciata	Geometridae	28	34	31	48.5548	79.9562	64.2555	6	polyphagous	2	Open_landscape	intermediate				Aplocera_simpliciata	64.2555	6	2
Apocheima_hispidaria	Geometridae	17.5	22.5	20	14.516	27.6847	21.1004	2	oligophagous	1	Forest	intermediate				Apocheima_hispidaria	21.1004	2	1
Apocheima_pilosaria	Geometridae	30	45	37.5	57.9706	164.28	111.126	40	polyphagous	2	Forest	intermediate				Apocheima_pilosaria	111.126	40	2
Aporia_crataegi	Pieridae	60	70	65	569.182	862.993	716.087	20	polyphagous	3	Open_landscape	intermediate				Aporia_crataegi	716.087	20	3
Aporophyla_lueneburgensis	Noctuidae	20	24	22	56.8856	78.3767	67.6312	5	oligophagous	2	Open_landscape	intermediate				Aporophyla_lueneburgensis	67.6312	5	2
Aporophyla_lutulenta	Noctuidae	19	23	21	51.981	72.7272	62.3541	14	polyphagous	3	Open_landscape	intermediate				Aporophyla_lutulenta	62.3541	14	3
Apotomis_betuletana	Tortricidae	16	22	19	15.8513	38.6644	27.2578	2	oligophagous	2	Forest	intermediate				Apotomis_betuletana	27.2578	2	2
Apotomis_capreana	Tortricidae	15	20	17.5	13.2307	29.6082	21.4194	2	oligophagous	2	Forest	intermediate				Apotomis_capreana	21.4194	2	2
Apotomis_infida	Tortricidae	16	22	19	15.8513	38.6644	27.2578	1	monophagous	2	Forest	intermediate				Apotomis_infida	27.2578	1	2
Apotomis_inundana	Tortricidae	14	19	16.5	10.9065	25.6471	18.2768	2	oligophagous	2	Forest	intermediate				Apotomis_inundana	18.2768	2	2
Apotomis_lineana	Tortricidae	14	18	16	10.9065	22.044	16.4753	2	oligophagous	2	Forest	intermediate				Apotomis_lineana	16.4753	2	2
Apotomis_sauciana	Tortricidae	16	22	19	15.8513	38.6644	27.2578	1	monophagous	2	Forest	intermediate				Apotomis_sauciana	27.2578	1	2
Apotomis_semifasciana	Tortricidae	14	19	16.5	10.9065	25.6471	18.2768	2	oligophagous	2	Forest	intermediate				Apotomis_semifasciana	18.2768	2	2
Apotomis_sororculana	Tortricidae	14	18	16	10.9065	22.044	16.4753	2	oligophagous	2	Forest	intermediate				Apotomis_sororculana	16.4753	2	2
Apotomis_turbidana	Tortricidae	14	19	16.5	10.9065	25.6471	18.2768	2	oligophagous	2	Forest	intermediate				Apotomis_turbidana	18.2768	2	2
Apterogenum_ypsillon	Noctuidae	15	20	17.5	34.3072	56.8856	45.5964	2	oligophagous	3	Open_landscape	sedentary				Apterogenum_ypsillon	45.5964	2	3
Araschnia_levana	Nymphalidae	30	40	35	138.441	305.384	221.912	3	oligophagous	3	Both	intermediate				Araschnia_levana	221.912	3	3
Archanara_geminipuncta	Noctuidae	32	40	36	129.958	192.377	161.168	2	oligophagous	1	Open_landscape	intermediate				Archanara_geminipuncta	161.168	2	1
Archanara_neurica	Noctuidae	15	20	17.5	34.3072	56.8856	45.5964	1	monophagous	2	Open_landscape	intermediate				Archanara_neurica	45.5964	1	2
Archanara_sparganii	Noctuidae	30	40	35	116.021	192.377	154.199	2	oligophagous	1	Open_landscape	intermediate				Archanara_sparganii	154.199	2	1
Archiearis_notha	Geometridae	22	28	25	26.1316	48.5548	37.3432	5	oligophagous	2	Forest	intermediate				Archiearis_notha	37.3432	5	2
Archiearis_parthenias	Geometridae	15	20	17.5	9.76925	20.4564	15.1128	2	oligophagous	2	Forest	intermediate				Archiearis_parthenias	15.1128	2	2
Archips_crataegana	Tortricidae	18	25	21.5	22.044	55.3044	38.6742	4	oligophagous	2	Forest	intermediate				Archips_crataegana	38.6742	4	2
Archips_oporana	Tortricidae	18	25	21.5	22.044	55.3044	38.6742	2	oligophagous	2	Forest	intermediate				Archips_oporana	38.6742	2	2
Archips_podana	Tortricidae	18	25	21.5	22.044	55.3044	38.6742	6	polyphagous	2	Forest	intermediate				Archips_podana	38.6742	6	2
Archips_rosana	Tortricidae	18	25	21.5	22.044	55.3044	38.6742	8	polyphagous	2	Forest	intermediate				Archips_rosana	38.6742	8	2
Archips_xylosteana	Tortricidae	18	25	21.5	22.044	55.3044	38.6742	5	oligophagous	2	Forest	intermediate				Archips_xylosteana	38.6742	5	2
Arctia_caja	Erebidae	22.5	32.5	27.5	51.1635	126.692	88.9279	20	polyphagous	4	Open_landscape	intermediate				Arctia_caja	88.9279	20	4
Arctia_flavia	Erebidae	50	65	57.5	366.495	699.891	533.193	40	polyphagous	3	Open_landscape	sedentary				Arctia_flavia	533.193	40	3
Arctornis_l-nigrum	Erebidae	17.5	25	21.25	27.5316	66.342	46.9368	ND	oligophagous	1	Forest	intermediate				Arctornis_l-nigrum	46.9368	6	1
Argynnis_paphia	Nymphalidae	55	70	62.5	733.126	1422.99	1078.06	2	oligophagous	3	Forest	intermediate				Argynnis_paphia	1078.06	2	3
Argyroploce_arbutella	Tortricidae	14	20	17	10.9065	29.6082	20.2573	1	monophagous	3	Open_landscape	intermediate				Argyroploce_arbutella	20.2573	1	3
Argyroploce_noricana	Tortricidae	14	18	16	10.9065	22.044	16.4753	1	monophagous	3	Open_landscape	sedentary				Argyroploce_noricana	16.4753	1	3
Argyrotaenia_ljungiana	Tortricidae	18	24	21	22.044	49.3309	35.6875	6	polyphagous	2	Forest	intermediate				Argyrotaenia_ljungiana	35.6875	6	2
Arichanna_melanaria	Geometridae	30	45	37.5	57.9706	164.28	111.126	20	polyphagous	2	Forest	intermediate				Arichanna_melanaria	111.126	20	2
Aricia_agestis	Lycaenidae	24	30	27	58.1622	103.898	81.03	3	oligophagous	1	Open_landscape	intermediate				Aricia_agestis	81.03	3	1
Aricia_artaxerxes	Lycaenidae	22	30	26	46.3864	103.898	75.1421	1	monophagous	1	Open_landscape	sedentary				Aricia_artaxerxes	75.1421	1	1
Ascotis_selenaria	Geometridae	40	50	45	121.388	215.346	168.367	50	polyphagous	2	Forest	intermediate				Ascotis_selenaria	168.367	50	2
Asteroscopus_sphinx	Noctuidae	17.5	22.5	20	44.9846	69.971	57.4778	14	polyphagous	2	Forest	intermediate				Asteroscopus_sphinx	57.4778	14	2
Asthena_albulata	Geometridae	9	12	10.5	2.62986	5.5068	4.06833	4	oligophagous	2	Forest	intermediate				Asthena_albulata	4.06833	4	2
Asthena_anseraria	Geometridae	18	22	20	15.6055	26.1316	20.8686	6	polyphagous	2	Forest	intermediate				Asthena_anseraria	20.8686	6	2
Aterpia_anderreggana	Tortricidae	16	22	19	15.8513	38.6644	27.2578	1	monophagous	3	Forest	sedentary				Aterpia_anderreggana	27.2578	1	3
Aterpia_corticana	Tortricidae	16	22	19	15.8513	38.6644	27.2578	2	oligophagous	2	Forest	intermediate				Aterpia_corticana	27.2578	2	2
Aterpia_sieversiana	Tortricidae	16	22	19	15.8513	38.6644	27.2578	2	oligophagous	3	Forest	sedentary				Aterpia_sieversiana	27.2578	2	3
Athetis_gluteosa	Noctuidae	30	40	35	116.021	192.377	154.199	20	polyphagous	2	Open_landscape	intermediate				Athetis_gluteosa	154.199	20	2
Athetis_pallustris	Noctuidae	15	20	17.5	34.3072	56.8856	45.5964	1	monophagous	2	Open_landscape	intermediate				Athetis_pallustris	45.5964	1	2
Atolmis_rubricollis	Erebidae	14	17.5	15.75	15.8807	27.5316	21.7062	3	oligophagous	2	Forest	intermediate				Atolmis_rubricollis	21.7062	3	2
Atypha_pulmonaris	Noctuidae	30	40	35	116.021	192.377	154.199	3	oligophagous	2	Open_landscape	intermediate				Atypha_pulmonaris	154.199	3	2
Auchmis_detersa	Noctuidae	35	45	40	152.13	236.629	194.38	1	monophagous	2	Open_landscape	intermediate				Auchmis_detersa	194.38	1	2
Autographa_aemula	Noctuidae	30	40	35	116.021	192.377	154.199	3	oligophagous	2	Open_landscape	intermediate				Autographa_aemula	154.199	3	2
Autographa_bractea	Noctuidae	17.5	22.5	20	44.9846	69.971	57.4778	9	polyphagous	4	Open_landscape	sedentary				Autographa_bractea	57.4778	9	4
Autographa_buraetica	Noctuidae	32	38	35	129.958	175.79	152.874	2	oligophagous	3	Open_landscape	sedentary				Autographa_buraetica	152.874	2	3
Autographa_gamma	Noctuidae	15	22.5	18.75	34.3072	69.971	52.1391	15	polyphagous	1	Open_landscape	dispersive				Autographa_gamma	52.1391	15	1
Autographa_jota	Noctuidae	17.5	22.5	20	44.9846	69.971	57.4778	13	polyphagous	3	Open_landscape	intermediate				Autographa_jota	57.4778	13	3
Autographa_pulchrina	Noctuidae	17.5	22.5	20	44.9846	69.971	57.4778	11	polyphagous	3	Open_landscape	intermediate				Autographa_pulchrina	57.4778	11	3
Axylia_putris	Noctuidae	17.5	22.5	20	44.9846	69.971	57.4778	11	polyphagous	3	Open_landscape	intermediate				Axylia_putris	57.4778	11	3
Bactra_lacteana	Tortricidae	14	20	17	10.9065	29.6082	20.2573	2	oligophagous	1	Open_landscape	intermediate				Bactra_lacteana	20.2573	2	1
Bactra_lancealana	Tortricidae	14	20	17	10.9065	29.6082	20.2573	2	oligophagous	1	Open_landscape	intermediate				Bactra_lancealana	20.2573	2	1
Baptria_tibiale	Geometridae	20	26	23	20.4564	40.1374	30.2969	3	oligophagous	2	Open_landscape	intermediate				Baptria_tibiale	30.2969	3	2
Bena_bicolorana	Nolidae	15	20	17.5	25.8875	62.3507	44.1191	5	oligophagous	1	Forest	intermediate				Bena_bicolorana	44.1191	5	1
Biston_betularia	Geometridae	20	27.5	23.75	20.4564	46.3584	33.4074	20	polyphagous	3	Forest	intermediate				Biston_betularia	33.4074	20	3
Biston_strataria	Geometridae	20	27.5	23.75	20.4564	46.3584	33.4074	9	polyphagous	2	Forest	intermediate				Biston_strataria	33.4074	9	2
Blastesthia_mughiana	Tortricidae	12	16	14	7.08329	15.8513	11.4673	1	monophagous	1	Forest	intermediate				Blastesthia_mughiana	11.4673	1	1
Boloria_aquilonaris	Nymphalidae	30	40	35	138.441	305.384	221.912	1	monophagous	3	Open_landscape	sedentary				Boloria_aquilonaris	221.912	1	3
Boloria_dia	Nymphalidae	30	40	35	138.441	305.384	221.912	3	oligophagous	3	Open_landscape	intermediate				Boloria_dia	221.912	3	3
Boloria_eunomia	Nymphalidae	30	40	35	138.441	305.384	221.912	2	oligophagous	3	Open_landscape	sedentary				Boloria_eunomia	221.912	2	3
Boloria_euphrosyne	Nymphalidae	30	40	35	138.441	305.384	221.912	5	oligophagous	3	Open_landscape	intermediate				Boloria_euphrosyne	221.912	5	3
Boloria_napaea	Nymphalidae	32	38	35	165.327	265.208	215.267	1	monophagous	3	Open_landscape	sedentary				Boloria_napaea	215.267	1	3
Boloria_pales	Nymphalidae	30	40	35	138.441	305.384	221.912	1	monophagous	3	Open_landscape	sedentary				Boloria_pales	221.912	1	3
Boloria_selene	Nymphalidae	30	40	35	138.441	305.384	221.912	2	oligophagous	4	Open_landscape	intermediate				Boloria_selene	221.912	2	4
Boloria_thore	Nymphalidae	30	38	34	138.441	265.208	201.824	1	monophagous	3	Open_landscape	sedentary				Boloria_thore	201.824	1	3
Boloria_titania	Nymphalidae	35	45	40	211.528	422.198	316.863	2	oligophagous	3	Open_landscape	sedentary				Boloria_titania	316.863	2	3
Boudinotiana_notha	Geometridae	12	15	13.5	5.5068	9.76925	7.63803	1	monophagous	2	Forest	sedentary				Boudinotiana_notha	7.63803	1	2
Brachionycha_nubeculosa	Noctuidae	17.5	22.5	20	44.9846	69.971	57.4778	1	monophagous	1	Forest	intermediate				Brachionycha_nubeculosa	57.4778	1	1
Brachylomia_viminalis	Noctuidae	15	20	17.5	34.3072	56.8856	45.5964	7	polyphagous	3	Open_landscape	intermediate				Brachylomia_viminalis	45.5964	7	3
Brenthis_ino	Nymphalidae	40	50	45	305.384	564.09	434.737	6	polyphagous	3	Open_landscape	intermediate				Brenthis_ino	434.737	6	3
Bryophila_domestica	Noctuidae	12.5	16	14.25	24.9	38.4285	31.6643	3	oligophagous	1	Open_landscape	intermediate				Bryophila_domestica	31.6643	3	1
Bryophila_ereptricula	Noctuidae	22	28	25	67.2609	102.77	85.0154	2	oligophagous	2	Open_landscape	intermediate				Bryophila_ereptricula	85.0154	2	2
Bryophila_raptricula	Noctuidae	11	14	12.5	19.8889	30.3889	25.1389	ND	oligophagous	2	Open_landscape	intermediate				Bryophila_raptricula	25.1389	6	2
Bupalus_piniaria	Geometridae	15	20	17.5	9.76925	20.4564	15.1128	3	oligophagous	3	Forest	intermediate				Bupalus_piniaria	15.1128	3	3
Cabera_exanthemata	Geometridae	12.5	17.5	15	6.11568	14.516	10.3159	7	polyphagous	3	Forest	intermediate				Cabera_exanthemata	10.3159	7	3
Cabera_pusaria	Geometridae	12.5	17.5	15	6.11568	14.516	10.3159	7	polyphagous	2	Forest	intermediate				Cabera_pusaria	10.3159	7	2
Cacoecimorpha_pronubana	Tortricidae	18	28	23	22.044	75.9574	49.0007	50	polyphagous	2	Both	intermediate				Cacoecimorpha_pronubana	49.0007	50	2
Calliergis_ramosa	Noctuidae	30	40	35	116.021	192.377	154.199	2	oligophagous	2	Forest	intermediate				Calliergis_ramosa	154.199	2	2
Callimorpha_dominula	Erebidae	22.5	27.5	25	51.1635	83.918	67.5407	20	polyphagous	4	Both	intermediate				Callimorpha_dominula	67.5407	20	4
Calliteara_fascelina	Erebidae	35	50	42.5	152.094	366.495	259.295	30	polyphagous	2	Open_landscape	intermediate				Calliteara_fascelina	259.295	30	2
Calliteara_pudibunda	Erebidae	20	30	25	38.2673	104	71.1337	12	polyphagous	3	Forest	intermediate				Calliteara_pudibunda	71.1337	12	3
Callophrys_rubi	Lycaenidae	26	34	30	71.618	143.859	107.738	8	polyphagous	4	Open_landscape	sedentary				Callophrys_rubi	107.738	8	4
Callopistria_juventina	Noctuidae	16	19	17.5	38.4285	51.981	45.2048	ND	oligophagous	2	Forest	intermediate				Callopistria_juventina	45.2048	6	2
Calophasia_lunula	Noctuidae	15	20	17.5	34.3072	56.8856	45.5964	4	oligophagous	1	Open_landscape	intermediate				Calophasia_lunula	45.5964	4	1
Campaea_margaritaria	Geometridae	20	25	22.5	20.4564	36.2903	28.3734	19	polyphagous	2	Forest	intermediate				Campaea_margaritaria	28.3734	19	2
Camptogramma_bilineata	Geometridae	12.5	16	14.25	6.11568	11.531	8.82334	15	polyphagous	4	Open_landscape	intermediate				Camptogramma_bilineata	8.82334	15	4
Camptogramma_scripturata	Geometridae	30	36	33	57.9706	92.6028	75.2867	20	polyphagous	2	Open_landscape	intermediate				Camptogramma_scripturata	75.2867	20	2
Capua_vulgana	Tortricidae	18	25	21.5	22.044	55.3044	38.6742	4	oligophagous	2	Forest	intermediate				Capua_vulgana	38.6742	4	2
Caradrina_clavipalpis	Noctuidae	15	20	17.5	34.3072	56.8856	45.5964	4	oligophagous	1	Open_landscape	intermediate				Caradrina_clavipalpis	45.5964	4	1
Caradrina_gilva	Noctuidae	30	40	35	116.021	192.377	154.199	3	oligophagous	2	Open_landscape	intermediate				Caradrina_gilva	154.199	3	2
Caradrina_kadenii	Noctuidae	14	17	15.5	30.3889	42.7499	36.5694	ND	oligophagous	1	Open_landscape	intermediate				Caradrina_kadenii	36.5694	6	1
Caradrina_morpheus	Noctuidae	15	20	17.5	34.3072	56.8856	45.5964	12	polyphagous	3	Open_landscape	intermediate				Caradrina_morpheus	45.5964	12	3
Caradrina_selini	Noctuidae	30	36	33	116.021	159.853	137.937	2	oligophagous	2	Open_landscape	intermediate				Caradrina_selini	137.937	2	2
Carcharodus_alceae	Hesperiidae	26	32	29	13.2269	23.1705	18.1987	3	oligophagous	3	Open_landscape	intermediate				Carcharodus_alceae	18.1987	3	3
Carcharodus_floccifera	Hesperiidae	26	32	29	13.2269	23.1705	18.1987	2	oligophagous	3	Open_landscape	sedentary				Carcharodus_floccifera	18.1987	2	3
Carsia_sororiata	Geometridae	10	13	11.5	3.44733	6.764	5.10566	3	oligophagous	1	Open_landscape	sedentary				Carsia_sororiata	5.10566	3	1
Carsia_sororiata_imbutata	Geometridae	20	26	23	20.4564	40.1374	30.2969	2	oligophagous	3	Open_landscape	sedentary				Carsia_sororiata_imbutata	30.2969	2	3
Carterocephalus_palaemon	Hesperiidae	25	30	27.5	11.8978	19.4651	15.6815	5	oligophagous	2	Open_landscape	intermediate				Carterocephalus_palaemon	15.6815	5	2
Cataclysta_lemnata	Crambidae	19	27	23	25.6471	68.6035	47.1253	3	oligophagous	1	Open_landscape	intermediate				Cataclysta_lemnata	47.1253	3	1
Catarhoe_cuculata	Geometridae	10	13	11.5	3.44733	6.764	5.10566	2	oligophagous	1	Open_landscape	intermediate				Catarhoe_cuculata	5.10566	2	1
Catarhoe_rubidata	Geometridae	10	13	11.5	3.44733	6.764	5.10566	2	oligophagous	1	Open_landscape	intermediate				Catarhoe_rubidata	5.10566	2	1
Catephia_alchymista	Erebidae	19	23	21	33.7209	54.0128	43.8669	ND	oligophagous	2	Forest	intermediate				Catephia_alchymista	43.8669	6	2
Catharia_simplonialis	Crambidae	20	26	23	29.6082	61.7238	45.666	3	oligophagous	3	Open_landscape	sedentary				Catharia_simplonialis	45.666	3	3
Catocala_electa	Erebidae	35	45	40	152.094	282.644	217.369	ND	oligophagous	2	Forest	intermediate				Catocala_electa	217.369	6	2
Catocala_elocata	Erebidae	35	45	40	152.094	282.644	217.369	ND	oligophagous	2	Forest	intermediate				Catocala_elocata	217.369	6	2
Catocala_fraxini	Erebidae	35	47.5	41.25	152.094	322.953	237.523	2	oligophagous	1	Forest	intermediate				Catocala_fraxini	237.523	2	1
Catocala_fulminea	Erebidae	60	80	70	574.531	1167.85	871.191	6	polyphagous	2	Forest	intermediate				Catocala_fulminea	871.191	6	2
Catocala_nupta	Erebidae	35	42.5	38.75	152.094	245.488	198.791	8	polyphagous	3	Forest	intermediate				Catocala_nupta	198.791	8	3
Catocala_sponsa	Erebidae	35	45	40	152.094	282.644	217.369	1	monophagous	1	Forest	intermediate				Catocala_sponsa	217.369	1	1
Catopsilia_florella	Pieridae	50	65	57.5	347.906	706.494	527.2	20	polyphagous	3	Open_landscape	dispersive				Catopsilia_florella	527.2	20	3
Catoptria_combinella	Crambidae	18	24	21	22.044	49.3309	35.6875	10	polyphagous	3	Open_landscape	intermediate				Catoptria_combinella	35.6875	10	3
Catoptria_conchella	Crambidae	20	28	24	29.6082	75.9574	52.7828	10	polyphagous	3	Open_landscape	intermediate				Catoptria_conchella	52.7828	10	3
Catoptria_falsella	Crambidae	20	27	23.5	29.6082	68.6035	49.1058	10	polyphagous	3	Open_landscape	intermediate				Catoptria_falsella	49.1058	10	3
Catoptria_furcatellus	Crambidae	18	24	21	22.044	49.3309	35.6875	15	polyphagous	3	Open_landscape	intermediate				Catoptria_furcatellus	35.6875	15	3
Catoptria_languidellus	Crambidae	18	24	21	22.044	49.3309	35.6875	10	polyphagous	3	Open_landscape	intermediate				Catoptria_languidellus	35.6875	10	3
Catoptria_luctiferella	Crambidae	18	24	21	22.044	49.3309	35.6875	10	polyphagous	3	Open_landscape	sedentary				Catoptria_luctiferella	35.6875	10	3
Catoptria_maculalis	Crambidae	22	28	25	38.6644	75.9574	57.3109	10	polyphagous	3	Open_landscape	intermediate				Catoptria_maculalis	57.3109	10	3
Catoptria_margaritella	Crambidae	22	30	26	38.6644	92.144	65.4042	20	polyphagous	3	Open_landscape	intermediate				Catoptria_margaritella	65.4042	20	3
Catoptria_myella	Crambidae	18	26	22	22.044	61.7238	41.8839	10	polyphagous	3	Open_landscape	intermediate				Catoptria_myella	41.8839	10	3
Catoptria_mytilella	Crambidae	16	22	19	15.8513	38.6644	27.2578	10	polyphagous	3	Open_landscape	intermediate				Catoptria_mytilella	27.2578	10	3
Catoptria_osthelderi	Crambidae	20	26	23	29.6082	61.7238	45.666	10	polyphagous	3	Open_landscape	sedentary				Catoptria_osthelderi	45.666	10	3
Catoptria_permutatellus	Crambidae	18	24	21	22.044	49.3309	35.6875	15	polyphagous	3	Open_landscape	intermediate				Catoptria_permutatellus	35.6875	15	3
Catoptria_permutatellus/osthelderi	Crambidae	0	0	0	0	0	0	15	polyphagous	3	Open_landscape	intermediate				Catoptria_permutatellus/osthelderi	0	15	3
Catoptria_petrificella	Crambidae	18	25	21.5	22.044	55.3044	38.6742	10	polyphagous	3	Open_landscape	sedentary				Catoptria_petrificella	38.6742	10	3
Catoptria_pinella	Crambidae	16	22	19	15.8513	38.6644	27.2578	15	polyphagous	2	Open_landscape	intermediate				Catoptria_pinella	27.2578	15	2
Catoptria_pyramidellus	Crambidae	16	22	19	15.8513	38.6644	27.2578	10	polyphagous	3	Open_landscape	intermediate				Catoptria_pyramidellus	27.2578	10	3
Catoptria_radiella	Crambidae	20	26	23	29.6082	61.7238	45.666	10	polyphagous	2	Open_landscape	intermediate				Catoptria_radiella	45.666	10	2
Catoptria_speculalis	Crambidae	20	26	23	29.6082	61.7238	45.666	10	polyphagous	3	Open_landscape	sedentary				Catoptria_speculalis	45.666	10	3
Catoptria_verellus	Crambidae	18	24	21	22.044	49.3309	35.6875	15	polyphagous	3	Open_landscape	intermediate				Catoptria_verellus	35.6875	15	3
Celaena_leucostigma	Noctuidae	30	40	35	116.021	192.377	154.199	2	oligophagous	1	Open_landscape	intermediate				Celaena_leucostigma	154.199	2	1
Celastrina_argiolus	Lycaenidae	26	34	30	71.618	143.859	107.738	12	polyphagous	2	Both	intermediate				Celastrina_argiolus	107.738	12	2
Celypha_aurofasciana	Tortricidae	12	17	14.5	7.08329	18.7838	12.9336	2	oligophagous	2	Open_landscape	intermediate				Celypha_aurofasciana	12.9336	2	2
Celypha_cespitana	Tortricidae	14	20	17	10.9065	29.6082	20.2573	3	oligophagous	2	Open_landscape	intermediate				Celypha_cespitana	20.2573	3	2
Celypha_flavipalpana	Tortricidae	12	16	14	7.08329	15.8513	11.4673	2	oligophagous	2	Open_landscape	intermediate				Celypha_flavipalpana	11.4673	2	2
Celypha_lacunana	Tortricidae	14	20	17	10.9065	29.6082	20.2573	5	oligophagous	2	Open_landscape	intermediate				Celypha_lacunana	20.2573	5	2
Celypha_rivulana	Tortricidae	14	20	17	10.9065	29.6082	20.2573	2	oligophagous	2	Open_landscape	intermediate				Celypha_rivulana	20.2573	2	2
Celypha_rosaceana	Tortricidae	12	16	14	7.08329	15.8513	11.4673	4	oligophagous	2	Open_landscape	intermediate				Celypha_rosaceana	11.4673	4	2
Celypha_rufana	Tortricidae	14	20	17	10.9065	29.6082	20.2573	2	oligophagous	2	Open_landscape	intermediate				Celypha_rufana	20.2573	2	2
Celypha_rurestrana	Tortricidae	14	20	17	10.9065	29.6082	20.2573	2	oligophagous	2	Open_landscape	intermediate				Celypha_rurestrana	20.2573	2	2
Celypha_siderana	Tortricidae	12	16	14	7.08329	15.8513	11.4673	2	oligophagous	2	Open_landscape	intermediate				Celypha_siderana	11.4673	2	2
Celypha_striana	Tortricidae	12	16	14	7.08329	15.8513	11.4673	2	oligophagous	2	Open_landscape	intermediate				Celypha_striana	11.4673	2	2
Cepphis_advenaria	Geometridae	17.5	22.5	20	14.516	27.6847	21.1004	4	oligophagous	3	Open_landscape	intermediate				Cepphis_advenaria	21.1004	4	3
Ceramica_pisi	Noctuidae	17.5	22.5	20	44.9846	69.971	57.4778	20	polyphagous	4	Open_landscape	intermediate				Ceramica_pisi	57.4778	20	4
Cerapteryx_graminis	Noctuidae	17.5	22.5	20	44.9846	69.971	57.4778	9	polyphagous	2	Open_landscape	intermediate				Cerapteryx_graminis	57.4778	9	2
Cerastis_leucographa	Noctuidae	17.5	22.5	20	44.9846	69.971	57.4778	1	monophagous	2	Open_landscape	intermediate				Cerastis_leucographa	57.4778	1	2
Cerastis_rubricosa	Noctuidae	17.5	22.5	20	44.9846	69.971	57.4778	8	polyphagous	3	Open_landscape	intermediate				Cerastis_rubricosa	57.4778	8	3
Cerura_erminea	Notodontidae	27.5	35	31.25	165.69	346.299	255.994	ND	oligophagous	2	Forest	intermediate				Cerura_erminea	255.994	6	2
Cerura_vinula	Notodontidae	30	40	35	216.176	520.86	368.518	3	oligophagous	3	Forest	intermediate				Cerura_vinula	368.518	3	3
Charanyca_trigrammica	Noctuidae	17.5	22.5	20	44.9846	69.971	57.4778	5	oligophagous	3	Open_landscape	intermediate				Charanyca_trigrammica	57.4778	5	3
Charissa_ambiguata	Geometridae	28	36	32	48.5548	92.6028	70.5788	6	polyphagous	3	Open_landscape	intermediate				Charissa_ambiguata	70.5788	6	3
Charissa_intermedia	Geometridae	28	36	32	48.5548	92.6028	70.5788	6	polyphagous	3	Open_landscape	sedentary				Charissa_intermedia	70.5788	6	3
Charissa_pullata	Geometridae	28	36	32	48.5548	92.6028	70.5788	6	polyphagous	3	Open_landscape	sedentary				Charissa_pullata	70.5788	6	3
Chersotis_alpestris	Noctuidae	32	40	36	129.958	192.377	161.168	2	oligophagous	3	Open_landscape	sedentary				Chersotis_alpestris	161.168	2	3
Chersotis_cuprea	Noctuidae	35	45	40	152.13	236.629	194.38	2	oligophagous	3	Open_landscape	sedentary				Chersotis_cuprea	194.38	2	3
Chersotis_margaritacea	Noctuidae	35	45	40	152.13	236.629	194.38	4	oligophagous	2	Open_landscape	intermediate				Chersotis_margaritacea	194.38	4	2
Chersotis_multangula	Noctuidae	35	45	40	152.13	236.629	194.38	2	oligophagous	3	Open_landscape	sedentary				Chersotis_multangula	194.38	2	3
Chersotis_ocellina	Noctuidae	35	45	40	152.13	236.629	194.38	2	oligophagous	3	Open_landscape	sedentary				Chersotis_ocellina	194.38	2	3
Chesias_legatella	Geometridae	12	15	13.5	5.5068	9.76925	7.63803	2	oligophagous	4	Open_landscape	intermediate				Chesias_legatella	7.63803	2	4
Chiasmia_clathrata	Geometridae	12.5	15	13.75	6.11568	9.76925	7.94247	8	polyphagous	3	Open_landscape	intermediate				Chiasmia_clathrata	7.94247	8	3
Chilo_phragmitella	Crambidae	22	32	27	38.6644	110.395	74.5295	6	polyphagous	1	Open_landscape	intermediate				Chilo_phragmitella	74.5295	6	1
Chilodes_maritima	Noctuidae	15	20	17.5	34.3072	56.8856	45.5964	1	monophagous	2	Open_landscape	intermediate				Chilodes_maritima	45.5964	1	2
Chloantha_hyperici	Noctuidae	15	19	17	34.3072	51.981	43.1441	ND	oligophagous	2	Open_landscape	intermediate				Chloantha_hyperici	43.1441	6	2
Chlorissa_cloraria	Geometridae	12.5	16	14.25	6.11568	11.531	8.82334	ND	oligophagous	1	Open_landscape	intermediate				Chlorissa_cloraria	8.82334	6	1
Chlorissa_viridata	Geometridae	11	14	12.5	4.40373	8.1825	6.29311	5	oligophagous	2	Open_landscape	intermediate				Chlorissa_viridata	6.29311	5	2
Chloroclysta_miata	Geometridae	15	19	17	9.76925	17.9309	13.8501	7	polyphagous	2	Forest	intermediate				Chloroclysta_miata	13.8501	7	2
Chloroclysta_miata_miata	Geometridae	28	34	31	48.5548	79.9562	64.2555	5	oligophagous	2	Forest	intermediate				Chloroclysta_miata_miata	64.2555	5	2
Chloroclysta_siterata	Geometridae	15	19	17	9.76925	17.9309	13.8501	11	polyphagous	2	Forest	intermediate				Chloroclysta_siterata	13.8501	11	2
Chloroclystis_v-ata	Geometridae	10	13	11.5	3.44733	6.764	5.10566	15	polyphagous	3	Forest	intermediate				Chloroclystis_v-ata	5.10566	15	3
Choristoneura_diversana	Tortricidae	16	22	19	15.8513	38.6644	27.2578	2	oligophagous	2	Forest	intermediate				Choristoneura_diversana	27.2578	2	2
Choristoneura_murinana	Tortricidae	16	22	19	15.8513	38.6644	27.2578	1	monophagous	1	Forest	intermediate				Choristoneura_murinana	27.2578	1	1
Chortodes_fluxa	Noctuidae	30	40	35	116.021	192.377	154.199	2	oligophagous	1	Open_landscape	intermediate				Chortodes_fluxa	154.199	2	1
Chortodes_pygmina	Noctuidae	30	36	33	116.021	159.853	137.937	2	oligophagous	1	Open_landscape	intermediate				Chortodes_pygmina	137.937	2	1
Chrysodeixis_chalcites	Noctuidae	14	17	15.5	30.3889	42.7499	36.5694	ND	oligophagous	3	Open_landscape	dispersive				Chrysodeixis_chalcites	36.5694	6	3
Chrysoteuchia_culmella	Crambidae	18	26	22	22.044	61.7238	41.8839	30	polyphagous	2	Open_landscape	intermediate				Chrysoteuchia_culmella	41.8839	30	2
Cidaria_fulvata	Geometridae	10	13	11.5	3.44733	6.764	5.10566	2	oligophagous	2	Open_landscape	intermediate				Cidaria_fulvata	5.10566	2	2
Cilix_glaucata	Drepanidae	11	14	12.5	10.1311	21.156	15.6435	2	oligophagous	2	Forest	intermediate				Cilix_glaucata	15.6435	2	2
Cleora_cinctaria	Geometridae	15	20	17.5	9.76925	20.4564	15.1128	6	polyphagous	2	Forest	intermediate				Cleora_cinctaria	15.1128	6	2
Cleorodes_lichenaria	Geometridae	14	17	15.5	8.1825	13.4743	10.8284	2	oligophagous	3	Forest	intermediate				Cleorodes_lichenaria	10.8284	2	3
Clepsis_consimilana	Tortricidae	18	24	21	22.044	49.3309	35.6875	5	oligophagous	2	Forest	intermediate				Clepsis_consimilana	35.6875	5	2
Clepsis_dumicolana	Tortricidae	16	22	19	15.8513	38.6644	27.2578	2	oligophagous	2	Forest	intermediate				Clepsis_dumicolana	27.2578	2	2
Clepsis_rogana	Tortricidae	18	24	21	22.044	49.3309	35.6875	3	oligophagous	2	Forest	intermediate				Clepsis_rogana	35.6875	3	2
Clepsis_rurinana	Tortricidae	18	24	21	22.044	49.3309	35.6875	2	oligophagous	2	Forest	intermediate				Clepsis_rurinana	35.6875	2	2
Clepsis_senecionana	Tortricidae	18	25	21.5	22.044	55.3044	38.6742	1	monophagous	2	Forest	intermediate				Clepsis_senecionana	38.6742	1	2
Clepsis_spectrana	Tortricidae	16	22	19	15.8513	38.6644	27.2578	4	oligophagous	2	Forest	intermediate				Clepsis_spectrana	27.2578	4	2
Clepsis_steineriana	Tortricidae	18	25	21.5	22.044	55.3044	38.6742	1	monophagous	3	Forest	sedentary				Clepsis_steineriana	38.6742	1	3
Clostera_anachoreta	Notodontidae	15	20	17.5	25.9788	62.594	44.2864	1	monophagous	1	Forest	intermediate				Clostera_anachoreta	44.2864	1	1
Clostera_anastomosis	Notodontidae	28	36	32	175.072	377.441	276.257	6	polyphagous	2	Forest	intermediate				Clostera_anastomosis	276.257	6	2
Clostera_curtula	Notodontidae	15	18	16.5	25.9788	45.3587	35.6688	3	oligophagous	3	Forest	intermediate				Clostera_curtula	35.6688	3	3
Clostera_pigra	Notodontidae	15	19	17	25.9788	53.5104	39.7446	3	oligophagous	3	Forest	intermediate				Clostera_pigra	39.7446	3	3
Cnephasia_alticolana	Tortricidae	16	22	19	15.8513	38.6644	27.2578	2	oligophagous	3	Open_landscape	sedentary				Cnephasia_alticolana	27.2578	2	3
Cnephasia_asseclana	Tortricidae	16	22	19	15.8513	38.6644	27.2578	5	oligophagous	2	Open_landscape	intermediate				Cnephasia_asseclana	27.2578	5	2
Cnephasia_communana	Tortricidae	14	20	17	10.9065	29.6082	20.2573	4	oligophagous	2	Open_landscape	intermediate				Cnephasia_communana	20.2573	4	2
Cnephasia_incertana	Tortricidae	14	20	17	10.9065	29.6082	20.2573	6	polyphagous	2	Open_landscape	intermediate				Cnephasia_incertana	20.2573	6	2
Cnephasia_stephensiana	Tortricidae	16	22	19	15.8513	38.6644	27.2578	5	oligophagous	2	Open_landscape	intermediate				Cnephasia_stephensiana	27.2578	5	2
Cochylidia_implicitana	Tortricidae	12	18	15	7.08329	22.044	14.5637	2	oligophagous	2	Open_landscape	intermediate				Cochylidia_implicitana	14.5637	2	2
Cochylidia_moguntiana	Tortricidae	12	16	14	7.08329	15.8513	11.4673	2	oligophagous	2	Open_landscape	sedentary				Cochylidia_moguntiana	11.4673	2	2
Cochylidia_rupicola	Tortricidae	12	16	14	7.08329	15.8513	11.4673	1	monophagous	3	Open_landscape	sedentary				Cochylidia_rupicola	11.4673	1	3
Cochylidia_subroseana	Tortricidae	12	16	14	7.08329	15.8513	11.4673	2	oligophagous	2	Open_landscape	intermediate				Cochylidia_subroseana	11.4673	2	2
Cochylis_dubitana	Tortricidae	14	20	17	10.9065	29.6082	20.2573	3	oligophagous	2	Open_landscape	intermediate				Cochylis_dubitana	20.2573	3	2
Cochylis_nana	Tortricidae	10	14	12	4.25136	10.9065	7.57894	2	oligophagous	2	Open_landscape	sedentary				Cochylis_nana	7.57894	2	2
Cochylis_pallidana	Tortricidae	12	16	14	7.08329	15.8513	11.4673	3	oligophagous	2	Open_landscape	intermediate				Cochylis_pallidana	11.4673	3	2
Cochylis_roseana	Tortricidae	12	16	14	7.08329	15.8513	11.4673	2	oligophagous	2	Open_landscape	intermediate				Cochylis_roseana	11.4673	2	2
Coenonympha_arcania	Nymphalidae	28	34	31	114.516	195.321	154.918	3	oligophagous	3	Open_landscape	intermediate				Coenonympha_arcania	154.918	3	3
Coenonympha_gardetta	Nymphalidae	26	32	29	93.4024	165.327	129.365	2	oligophagous	3	Open_landscape	sedentary				Coenonympha_gardetta	129.365	2	3
Coenonympha_glycerion	Nymphalidae	30	36	33	138.441	228.567	183.504	3	oligophagous	3	Open_landscape	intermediate				Coenonympha_glycerion	183.504	3	3
Coenonympha_pamphilus	Nymphalidae	28	34	31	114.516	195.321	154.918	4	oligophagous	2	Open_landscape	intermediate				Coenonympha_pamphilus	154.918	4	2
Coenonympha_tullia	Nymphalidae	28	36	32	114.516	228.567	171.541	3	oligophagous	1	Open_landscape	intermediate				Coenonympha_tullia	171.541	3	1
Coenotephria_salicata	Geometridae	10	13	11.5	3.44733	6.764	5.10566	3	oligophagous	4	Open_landscape	intermediate				Coenotephria_salicata	5.10566	3	4
Coenotephria_tophaceata	Geometridae	20	26	23	20.4564	40.1374	30.2969	6	polyphagous	3	Open_landscape	intermediate				Coenotephria_tophaceata	30.2969	6	3
Colias_alfacariensis	Pieridae	40	50	45	190.46	347.906	269.183	ND	polyphagous	3	Open_landscape	intermediate				Colias_alfacariensis	269.183	6	3
Colias_crocea	Pieridae	45	55	50	261.768	450.01	355.889	7	polyphagous	1	Open_landscape	dispersive				Colias_crocea	355.889	7	1
Colias_hyale	Pieridae	40	50	45	190.46	347.906	269.183	ND	polyphagous	3	Open_landscape	dispersive				Colias_hyale	269.183	6	3
Colias_palaeno	Pieridae	40	50	45	190.46	347.906	269.183	1	monophagous	3	Open_landscape	intermediate				Colias_palaeno	269.183	1	3
Colias_phicomone	Pieridae	35	45	40	132.809	261.768	197.288	1	monophagous	3	Open_landscape	sedentary				Colias_phicomone	197.288	1	3
Colobochyla_salicalis	Erebidae	14	17.5	15.75	15.8807	27.5316	21.7062	ND	oligophagous	1	Forest	intermediate				Colobochyla_salicalis	21.7062	6	1
Colocasia_coryli	Noctuidae	20	25	22.5	56.8856	84.2075	70.5465	18	polyphagous	2	Forest	intermediate				Colocasia_coryli	70.5465	18	2
Colostygia_aptata	Geometridae	20	26	23	20.4564	40.1374	30.2969	6	polyphagous	2	Forest	intermediate				Colostygia_aptata	30.2969	6	2
Colostygia_aqueata	Geometridae	20	26	23	20.4564	40.1374	30.2969	6	polyphagous	2	Forest	intermediate				Colostygia_aqueata	30.2969	6	2
Colostygia_austriacaria	Geometridae	20	26	23	20.4564	40.1374	30.2969	3	oligophagous	3	Open_landscape	sedentary				Colostygia_austriacaria	30.2969	3	3
Colostygia_kollariaria	Geometridae	20	26	23	20.4564	40.1374	30.2969	3	oligophagous	3	Open_landscape	sedentary				Colostygia_kollariaria	30.2969	3	3
Colostygia_olivata	Geometridae	10	13	11.5	3.44733	6.764	5.10566	3	oligophagous	4	Forest	intermediate				Colostygia_olivata	5.10566	3	4
Colostygia_pectinataria	Geometridae	11	14	12.5	4.40373	8.1825	6.29311	7	polyphagous	4	Open_landscape	intermediate				Colostygia_pectinataria	6.29311	7	4
Colostygia_turbata	Geometridae	20	26	23	20.4564	40.1374	30.2969	6	polyphagous	2	Forest	intermediate				Colostygia_turbata	30.2969	6	2
Colotois_pennaria	Geometridae	20	27.5	23.75	20.4564	46.3584	33.4074	19	polyphagous	3	Forest	intermediate				Colotois_pennaria	33.4074	19	3
Comibaena_bajularia	Geometridae	15	18	16.5	9.76925	15.6055	12.6874	2	oligophagous	1	Forest	intermediate				Comibaena_bajularia	12.6874	2	1
Conistra_erythrocephala	Noctuidae	17.5	22.5	20	44.9846	69.971	57.4778	ND	oligophagous	2	Forest	intermediate				Conistra_erythrocephala	57.4778	6	2
Conistra_ligula	Noctuidae	17.5	22.5	20	44.9846	69.971	57.4778	11	polyphagous	2	Forest	intermediate				Conistra_ligula	57.4778	11	2
Conistra_rubiginea	Noctuidae	17.5	22.5	20	44.9846	69.971	57.4778	1	monophagous	2	Forest	intermediate				Conistra_rubiginea	57.4778	1	2
Conistra_rubiginosa	Noctuidae	17.5	22.5	20	44.9846	69.971	57.4778	ND	oligophagous	1	Forest	intermediate				Conistra_rubiginosa	57.4778	6	1
Conistra_vaccinii	Noctuidae	17.5	22.5	20	44.9846	69.971	57.4778	12	polyphagous	2	Forest	intermediate				Conistra_vaccinii	57.4778	12	2
Coranarta_cordigera	Noctuidae	15	20	17.5	34.3072	56.8856	45.5964	1	monophagous	2	Open_landscape	sedentary				Coranarta_cordigera	45.5964	1	2
Cosmia_affinis	Noctuidae	17.5	22.5	20	44.9846	69.971	57.4778	4	oligophagous	2	Forest	intermediate				Cosmia_affinis	57.4778	4	2
Cosmia_diffinis	Noctuidae	17.5	22.5	20	44.9846	69.971	57.4778	3	oligophagous	1	Forest	intermediate				Cosmia_diffinis	57.4778	3	1
Cosmia_pyralina	Noctuidae	17.5	22.5	20	44.9846	69.971	57.4778	11	polyphagous	2	Forest	intermediate				Cosmia_pyralina	57.4778	11	2
Cosmia_trapezina	Noctuidae	17.5	22.5	20	44.9846	69.971	57.4778	12	polyphagous	2	Forest	intermediate				Cosmia_trapezina	57.4778	12	2
Cosmorhoe_ocellata	Geometridae	10	13	11.5	3.44733	6.764	5.10566	4	oligophagous	4	Open_landscape	intermediate				Cosmorhoe_ocellata	5.10566	4	4
Cosmotriche_lobulina	Lasiocampidae	35	50	42.5	345.07	1026.26	685.664	6	polyphagous	2	Forest	intermediate				Cosmotriche_lobulina	685.664	6	2
Cossus_cossus	Cossidae	27.5	37.5	32.5	167.255	431.417	299.336	11	polyphagous	3	Forest	intermediate				Cossus_cossus	299.336	11	3
Costignophos_pullata	Geometridae	28	34	31	48.5548	79.9562	64.2555	6	polyphagous	3	Open_landscape	sedentary				Costignophos_pullata	64.2555	6	3
Crambus_alienellus	Crambidae	18	24	21	22.044	49.3309	35.6875	10	polyphagous	2	Open_landscape	intermediate				Crambus_alienellus	35.6875	10	2
Crambus_ericella	Crambidae	22	30	26	38.6644	92.144	65.4042	5	oligophagous	3	Open_landscape	intermediate				Crambus_ericella	65.4042	5	3
Crambus_hamella	Crambidae	20	26	23	29.6082	61.7238	45.666	10	polyphagous	2	Open_landscape	intermediate				Crambus_hamella	45.666	10	2
Crambus_lathoniellus	Crambidae	18	25	21.5	22.044	55.3044	38.6742	10	polyphagous	2	Open_landscape	intermediate				Crambus_lathoniellus	38.6742	10	2
Crambus_pascuella	Crambidae	22	30	26	38.6644	92.144	65.4042	20	polyphagous	2	Open_landscape	intermediate				Crambus_pascuella	65.4042	20	2
Crambus_perlella	Crambidae	22	30	26	38.6644	92.144	65.4042	30	polyphagous	2	Open_landscape	intermediate				Crambus_perlella	65.4042	30	2
Crambus_pratella	Crambidae	18	25	21.5	22.044	55.3044	38.6742	20	polyphagous	2	Open_landscape	intermediate				Crambus_pratella	38.6742	20	2
Crambus_silvella	Crambidae	22	30	26	38.6644	92.144	65.4042	10	polyphagous	2	Open_landscape	intermediate				Crambus_silvella	65.4042	10	2
Crambus_uliginosellus	Crambidae	20	28	24	29.6082	75.9574	52.7828	10	polyphagous	3	Open_landscape	intermediate				Crambus_uliginosellus	52.7828	10	3
Craniophora_ligustri	Noctuidae	17.5	22.5	20	44.9846	69.971	57.4778	4	oligophagous	2	Forest	intermediate				Craniophora_ligustri	57.4778	4	2
Crocallis_elinguaria	Geometridae	20	27.5	23.75	20.4564	46.3584	33.4074	18	polyphagous	2	Forest	intermediate				Crocallis_elinguaria	33.4074	18	2
Crocota_niveata	Geometridae	30	40	35	57.9706	121.388	89.6792	6	polyphagous	2	Open_landscape	intermediate				Crocota_niveata	89.6792	6	2
Cryphia_algae	Noctuidae	14	18	16	30.3889	47.2683	38.8286	1	monophagous	1	Open_landscape	intermediate				Cryphia_algae	38.8286	1	1
Crypsedra_gemmea	Noctuidae	15	20	17.5	34.3072	56.8856	45.5964	ND	oligophagous	3	Open_landscape	intermediate				Crypsedra_gemmea	45.5964	6	3
Cucullia_absinthii	Noctuidae	17.5	22.5	20	44.9846	69.971	57.4778	3	oligophagous	1	Open_landscape	intermediate				Cucullia_absinthii	57.4778	3	1
Cucullia_artemisiae	Noctuidae	17	21	19	42.7499	61.9796	52.3647	ND	oligophagous	2	Open_landscape	intermediate				Cucullia_artemisiae	52.3647	6	2
Cucullia_asteris	Noctuidae	17.5	22.5	20	44.9846	69.971	57.4778	5	oligophagous	2	Open_landscape	intermediate				Cucullia_asteris	57.4778	5	2
Cucullia_campanulae	Noctuidae	35	45	40	152.13	236.629	194.38	1	monophagous	2	Open_landscape	intermediate				Cucullia_campanulae	194.38	1	2
Cucullia_chamomillae	Noctuidae	17.5	22.5	20	44.9846	69.971	57.4778	5	oligophagous	1	Open_landscape	intermediate				Cucullia_chamomillae	57.4778	5	1
Cucullia_lactucae	Noctuidae	35	45	40	152.13	236.629	194.38	3	oligophagous	2	Open_landscape	intermediate				Cucullia_lactucae	194.38	3	2
Cucullia_lucifuga	Noctuidae	35	45	40	152.13	236.629	194.38	2	oligophagous	2	Open_landscape	intermediate				Cucullia_lucifuga	194.38	2	2
Cucullia_umbratica	Noctuidae	17.5	22.5	20	44.9846	69.971	57.4778	4	oligophagous	2	Open_landscape	intermediate				Cucullia_umbratica	57.4778	4	2
Cupido_argiades	Lycaenidae	22	30	26	46.3864	103.898	75.1421	ND	polyphagous	3	Open_landscape	intermediate				Cupido_argiades	75.1421	6	3
Cupido_minimus	Lycaenidae	16	22	19	20.2676	46.3864	33.327	1	monophagous	1	Open_landscape	sedentary				Cupido_minimus	33.327	1	1
Cyaniris_semiargus	Lycaenidae	24	30	27	58.1622	103.898	81.03	ND	polyphagous	3	Open_landscape	sedentary				Cyaniris_semiargus	81.03	6	3
Cybosia_mesomella	Erebidae	11	15	13	8.76223	18.8258	13.794	3	oligophagous	4	Forest	intermediate				Cybosia_mesomella	13.794	3	4
Cyclophora_albipunctata	Geometridae	10	13	11.5	3.44733	6.764	5.10566	2	oligophagous	3	Forest	intermediate				Cyclophora_albipunctata	5.10566	2	3
Cyclophora_annularia	Geometridae	10	13	11.5	3.44733	6.764	5.10566	1	monophagous	2	Forest	intermediate				Cyclophora_annularia	5.10566	1	2
Cyclophora_linearia	Geometridae	11	15	13	4.40373	9.76925	7.08649	3	oligophagous	1	Forest	intermediate				Cyclophora_linearia	7.08649	3	1
Cyclophora_pendularia	Geometridae	9	12	10.5	2.62986	5.5068	4.06833	5	oligophagous	2	Forest	intermediate				Cyclophora_pendularia	4.06833	5	2
Cyclophora_porata	Geometridae	10	13	11.5	3.44733	6.764	5.10566	1	monophagous	2	Forest	intermediate				Cyclophora_porata	5.10566	1	2
Cyclophora_punctaria	Geometridae	10	13	11.5	3.44733	6.764	5.10566	1	monophagous	1	Forest	intermediate				Cyclophora_punctaria	5.10566	1	1
Cyclophora_puppillaria	Geometridae	11	14	12.5	4.40373	8.1825	6.29311	2	oligophagous	1	Both	intermediate				Cyclophora_puppillaria	6.29311	2	1
Cydalima_perspectalis	Crambidae	36	44	40	153.523	269.274	211.399	6	polyphagous	2	Both	dispersive				Cydalima_perspectalis	211.399	6	2
Cydia_amplana	Tortricidae	14	20	17	10.9065	29.6082	20.2573	2	oligophagous	2	Forest	intermediate				Cydia_amplana	20.2573	2	2
Cydia_cognatana	Tortricidae	14	20	17	10.9065	29.6082	20.2573	2	oligophagous	2	Forest	intermediate				Cydia_cognatana	20.2573	2	2
Cydia_coniferana	Tortricidae	12	18	15	7.08329	22.044	14.5637	1	monophagous	1	Forest	intermediate				Cydia_coniferana	14.5637	1	1
Cydia_cosmophorana	Tortricidae	12	18	15	7.08329	22.044	14.5637	1	monophagous	2	Forest	sedentary				Cydia_cosmophorana	14.5637	1	2
Cydia_fagiglandana	Tortricidae	14	20	17	10.9065	29.6082	20.2573	2	oligophagous	2	Forest	intermediate				Cydia_fagiglandana	20.2573	2	2
Cydia_illutana	Tortricidae	12	18	15	7.08329	22.044	14.5637	1	monophagous	1	Forest	intermediate				Cydia_illutana	14.5637	1	1
Cydia_indivisa	Tortricidae	12	18	15	7.08329	22.044	14.5637	1	monophagous	3	Forest	sedentary				Cydia_indivisa	14.5637	1	3
Cydia_inquinatana	Tortricidae	14	20	17	10.9065	29.6082	20.2573	2	oligophagous	2	Forest	intermediate				Cydia_inquinatana	20.2573	2	2
Cydia_nigricana	Tortricidae	14	20	17	10.9065	29.6082	20.2573	1	monophagous	2	Open_landscape	intermediate				Cydia_nigricana	20.2573	1	2
Cydia_pactolana	Tortricidae	14	20	17	10.9065	29.6082	20.2573	1	monophagous	1	Forest	intermediate				Cydia_pactolana	20.2573	1	1
Cydia_pomonella	Tortricidae	15	22	18.5	13.2307	38.6644	25.9475	15	polyphagous	2	Open_landscape	intermediate				Cydia_pomonella	25.9475	15	2
Cydia_servillana	Tortricidae	14	20	17	10.9065	29.6082	20.2573	2	oligophagous	2	Forest	intermediate				Cydia_servillana	20.2573	2	2
Cydia_splendana	Tortricidae	14	20	17	10.9065	29.6082	20.2573	2	oligophagous	2	Forest	intermediate				Cydia_splendana	20.2573	2	2
Cydia_strobilella	Tortricidae	12	18	15	7.08329	22.044	14.5637	1	monophagous	1	Forest	intermediate				Cydia_strobilella	14.5637	1	1
Cydia_succedana	Tortricidae	14	20	17	10.9065	29.6082	20.2573	2	oligophagous	2	Open_landscape	intermediate				Cydia_succedana	20.2573	2	2
Cymolomia_hartigiana	Tortricidae	18	24	21	22.044	49.3309	35.6875	1	monophagous	1	Forest	intermediate				Cymolomia_hartigiana	35.6875	1	1
Cynaeda_dentalis	Crambidae	22	28	25	38.6644	75.9574	57.3109	3	oligophagous	2	Open_landscape	intermediate				Cynaeda_dentalis	57.3109	3	2
Daphnis_nerii	Sphingidae	45	60	52.5	744.323	1792.97	1268.65	ND	oligophagous	3	Open_landscape	dispersive				Daphnis_nerii	1268.65	6	3
Dasypolia_ferdinandi	Noctuidae	40	50	45	192.377	284.775	238.576	1	monophagous	3	Open_landscape	sedentary				Dasypolia_ferdinandi	238.576	1	3
Dasypolia_templi	Noctuidae	17.5	22.5	20	44.9846	69.971	57.4778	2	oligophagous	2	Open_landscape	sedentary				Dasypolia_templi	57.4778	2	2
Deilephila_elpenor	Sphingidae	25	35	30	123.495	345.315	234.405	4	oligophagous	4	Open_landscape	dispersive				Deilephila_elpenor	234.405	4	4
Deilephila_porcellus	Sphingidae	22.5	30	26.25	89.4981	215.589	152.544	2	oligophagous	1	Open_landscape	intermediate				Deilephila_porcellus	152.544	2	1
Deileptenia_ribeata	Geometridae	14	18	16	8.1825	15.6055	11.894	6	polyphagous	2	Forest	intermediate				Deileptenia_ribeata	11.894	6	2
Deltote_bankiana	Noctuidae	12	15	13.5	23.1759	34.3072	28.7415	2	oligophagous	2	Open_landscape	intermediate				Deltote_bankiana	28.7415	2	2
Deltote_deceptoria	Noctuidae	12	15	13.5	23.1759	34.3072	28.7415	ND	oligophagous	2	Open_landscape	intermediate				Deltote_deceptoria	28.7415	6	2
Deltote_pygarga	Noctuidae	12	15	13.5	23.1759	34.3072	28.7415	2	oligophagous	4	Open_landscape	intermediate				Deltote_pygarga	28.7415	2	4
Deltote_uncula	Noctuidae	12	15	13.5	23.1759	34.3072	28.7415	4	oligophagous	2	Open_landscape	intermediate				Deltote_uncula	28.7415	4	2
Dendrolimus_pini	Lasiocampidae	25	35	30	123.415	345.07	234.243	1	monophagous	2	Forest	intermediate				Dendrolimus_pini	234.243	1	2
Depressaria_albipunctella	Depressariidae	18	26	22	22.044	61.7238	41.8839	6	polyphagous	2	Open_landscape	intermediate				Depressaria_albipunctella	41.8839	6	2
Depressaria_badiella	Depressariidae	20	28	24	29.6082	75.9574	52.7828	6	polyphagous	2	Open_landscape	intermediate				Depressaria_badiella	52.7828	6	2
Depressaria_chaerophylli	Depressariidae	22	30	26	38.6644	92.144	65.4042	6	polyphagous	2	Open_landscape	intermediate				Depressaria_chaerophylli	65.4042	6	2
Depressaria_douglasella	Depressariidae	18	26	22	22.044	61.7238	41.8839	6	polyphagous	2	Open_landscape	intermediate				Depressaria_douglasella	41.8839	6	2
Depressaria_heydenii	Depressariidae	18	26	22	22.044	61.7238	41.8839	3	oligophagous	3	Open_landscape	sedentary				Depressaria_heydenii	41.8839	3	3
Depressaria_libanotidella	Depressariidae	22	30	26	38.6644	92.144	65.4042	3	oligophagous	2	Open_landscape	intermediate				Depressaria_libanotidella	65.4042	3	2
Depressaria_olerella	Depressariidae	18	26	22	22.044	61.7238	41.8839	6	polyphagous	2	Open_landscape	intermediate				Depressaria_olerella	41.8839	6	2
Depressaria_pimpinellae	Depressariidae	19	27	23	25.6471	68.6035	47.1253	6	polyphagous	2	Open_landscape	intermediate				Depressaria_pimpinellae	47.1253	6	2
Depressaria_pulcherrimella	Depressariidae	18	26	22	22.044	61.7238	41.8839	6	polyphagous	3	Open_landscape	sedentary				Depressaria_pulcherrimella	41.8839	6	3
Depressaria_radiella	Depressariidae	20	28	24	29.6082	75.9574	52.7828	3	oligophagous	2	Open_landscape	intermediate				Depressaria_radiella	52.7828	3	2
Diachrysia_chrysitis	Noctuidae	15	20	17.5	34.3072	56.8856	45.5964	16	polyphagous	4	Open_landscape	intermediate				Diachrysia_chrysitis	45.5964	16	4
Diachrysia_chryson	Noctuidae	15	20	17.5	34.3072	56.8856	45.5964	1	monophagous	2	Open_landscape	intermediate				Diachrysia_chryson	45.5964	1	2
Diachrysia_chryson_chryson	Noctuidae	28	34	31	102.77	144.572	123.671	3	oligophagous	3	Open_landscape	intermediate				Diachrysia_chryson_chryson	123.671	3	3
Diachrysia_stenochrysis	Noctuidae	30	40	35	116.021	192.377	154.199	2	oligophagous	3	Open_landscape	sedentary				Diachrysia_stenochrysis	154.199	2	3
Diacrisia_sannio	Erebidae	17.5	21	19.25	27.5316	43.1595	35.3456	11	polyphagous	4	Open_landscape	intermediate				Diacrisia_sannio	35.3456	11	4
Diaphora_mendica	Erebidae	15	22.5	18.75	18.8258	51.1635	34.9947	14	polyphagous	3	Open_landscape	intermediate				Diaphora_mendica	34.9947	14	3
Diarsia_brunnea	Noctuidae	17.5	22.5	20	44.9846	69.971	57.4778	12	polyphagous	2	Forest	intermediate				Diarsia_brunnea	57.4778	12	2
Diarsia_dahlii	Noctuidae	17.5	22.5	20	44.9846	69.971	57.4778	9	polyphagous	3	Forest	sedentary				Diarsia_dahlii	57.4778	9	3
Diarsia_mendica	Noctuidae	17.5	22.5	20	44.9846	69.971	57.4778	14	polyphagous	4	Forest	intermediate				Diarsia_mendica	57.4778	14	4
Diarsia_rubi	Noctuidae	17.5	22.5	20	44.9846	69.971	57.4778	8	polyphagous	4	Forest	intermediate				Diarsia_rubi	57.4778	8	4
Diasemia_reticularis	Crambidae	18	27	22.5	22.044	68.6035	45.3237	40	polyphagous	3	Open_landscape	intermediate				Diasemia_reticularis	45.3237	40	3
Dicallomera_fascelina	Erebidae	20	27.5	23.75	38.2673	83.918	61.0926	12	polyphagous	2	Open_landscape	intermediate				Dicallomera_fascelina	61.0926	12	2
Dichagyris_nigrescens	Noctuidae	35	45	40	152.13	236.629	194.38	2	oligophagous	3	Open_landscape	sedentary				Dichagyris_nigrescens	194.38	2	3
Dichagyris_signifera	Noctuidae	35	45	40	152.13	236.629	194.38	2	oligophagous	3	Open_landscape	sedentary				Dichagyris_signifera	194.38	2	3
Dichelia_histrionana	Tortricidae	18	25	21.5	22.044	55.3044	38.6742	2	oligophagous	2	Forest	intermediate				Dichelia_histrionana	38.6742	2	2
Dichonia_convergens	Noctuidae	34	42	38	144.572	209.604	177.088	1	monophagous	2	Forest	sedentary				Dichonia_convergens	177.088	1	2
Dichrorampha_acuminatana	Tortricidae	12	16	14	7.08329	15.8513	11.4673	1	monophagous	2	Open_landscape	intermediate				Dichrorampha_acuminatana	11.4673	1	2
Dichrorampha_aeratana	Tortricidae	12	16	14	7.08329	15.8513	11.4673	1	monophagous	2	Open_landscape	intermediate				Dichrorampha_aeratana	11.4673	1	2
Dichrorampha_agilana	Tortricidae	11	15	13	5.55171	13.2307	9.39121	2	oligophagous	2	Open_landscape	intermediate				Dichrorampha_agilana	9.39121	2	2
Dichrorampha_alpestrana	Tortricidae	12	16	14	7.08329	15.8513	11.4673	1	monophagous	3	Open_landscape	sedentary				Dichrorampha_alpestrana	11.4673	1	3
Dichrorampha_alpigenana	Tortricidae	12	16	14	7.08329	15.8513	11.4673	1	monophagous	3	Open_landscape	sedentary				Dichrorampha_alpigenana	11.4673	1	3
Dichrorampha_alpinana	Tortricidae	12	16	14	7.08329	15.8513	11.4673	1	monophagous	3	Open_landscape	sedentary				Dichrorampha_alpinana	11.4673	1	3
Dichrorampha_bugnionana	Tortricidae	12	16	14	7.08329	15.8513	11.4673	1	monophagous	2	Open_landscape	intermediate				Dichrorampha_bugnionana	11.4673	1	2
Dichrorampha_cacaleana	Tortricidae	12	16	14	7.08329	15.8513	11.4673	1	monophagous	3	Open_landscape	sedentary				Dichrorampha_cacaleana	11.4673	1	3
Dichrorampha_dentivalva	Tortricidae	12	16	14	7.08329	15.8513	11.4673	1	monophagous	2	Open_landscape	intermediate				Dichrorampha_dentivalva	11.4673	1	2
Dichrorampha_flavidorsana	Tortricidae	12	16	14	7.08329	15.8513	11.4673	2	oligophagous	2	Open_landscape	intermediate				Dichrorampha_flavidorsana	11.4673	2	2
Dichrorampha_petiverella	Tortricidae	12	16	14	7.08329	15.8513	11.4673	2	oligophagous	2	Open_landscape	intermediate				Dichrorampha_petiverella	11.4673	2	2
Dichrorampha_plumbagana	Tortricidae	12	16	14	7.08329	15.8513	11.4673	1	monophagous	2	Open_landscape	intermediate				Dichrorampha_plumbagana	11.4673	1	2
Dichrorampha_plumbana	Tortricidae	12	16	14	7.08329	15.8513	11.4673	2	oligophagous	2	Open_landscape	intermediate				Dichrorampha_plumbana	11.4673	2	2
Dichrorampha_sedatana	Tortricidae	12	16	14	7.08329	15.8513	11.4673	1	monophagous	2	Open_landscape	intermediate				Dichrorampha_sedatana	11.4673	1	2
Dichrorampha_simpliciana	Tortricidae	12	16	14	7.08329	15.8513	11.4673	1	monophagous	2	Open_landscape	intermediate				Dichrorampha_simpliciana	11.4673	1	2
Dichrorampha_vancouverana	Tortricidae	12	16	14	7.08329	15.8513	11.4673	1	monophagous	3	Open_landscape	sedentary				Dichrorampha_vancouverana	11.4673	1	3
Diloba_caeruleocephala	Noctuidae	17.5	22.5	20	44.9846	69.971	57.4778	13	polyphagous	2	Forest	intermediate				Diloba_caeruleocephala	57.4778	13	2
Diplopseustis_perieresalis	Crambidae	18	24	21	22.044	49.3309	35.6875	20	polyphagous	2	Open_landscape	intermediate				Diplopseustis_perieresalis	35.6875	20	2
Discestra_trifolii	Noctuidae	35	45	40	152.13	236.629	194.38	100	polyphagous	3	Open_landscape	intermediate				Discestra_trifolii	194.38	100	3
Doloploca_punctulana	Tortricidae	18	25	21.5	22.044	55.3044	38.6742	2	oligophagous	2	Forest	intermediate				Doloploca_punctulana	38.6742	2	2
Donacaula_mucronella	Crambidae	18	30	24	22.044	92.144	57.094	5	oligophagous	1	Open_landscape	intermediate				Donacaula_mucronella	57.094	5	1
Drepana_falcataria	Drepanidae	15	19	17	26.1166	53.7484	39.9325	3	oligophagous	3	Forest	intermediate				Drepana_falcataria	39.9325	3	3
Drymonia_dodonaea	Notodontidae	17.5	22.5	20	41.6162	89.7213	65.6688	2	oligophagous	1	Forest	intermediate				Drymonia_dodonaea	65.6688	2	1
Drymonia_querna	Notodontidae	34	42	38	316.934	604.634	460.784	6	polyphagous	2	Forest	intermediate				Drymonia_querna	460.784	6	2
Drymonia_ruficornis	Notodontidae	15	20	17.5	25.9788	62.594	44.2864	2	oligophagous	1	Forest	intermediate				Drymonia_ruficornis	44.2864	2	1
Dryobotodes_eremita	Noctuidae	17.5	22.5	20	44.9846	69.971	57.4778	5	oligophagous	1	Forest	intermediate				Dryobotodes_eremita	57.4778	5	1
Duponchelia_fovealis	Crambidae	18	24	21	22.044	49.3309	35.6875	50	polyphagous	3	Open_landscape	dispersive				Duponchelia_fovealis	35.6875	50	3
Dypterygia_scabriuscula	Noctuidae	17.5	22.5	20	44.9846	69.971	57.4778	3	oligophagous	3	Forest	intermediate				Dypterygia_scabriuscula	57.4778	3	3
Dysstroma_citrata	Geometridae	10	13	11.5	3.44733	6.764	5.10566	6	polyphagous	3	Forest	intermediate				Dysstroma_citrata	5.10566	6	3
Dysstroma_truncata	Geometridae	10	13	11.5	3.44733	6.764	5.10566	20	polyphagous	3	Forest	intermediate				Dysstroma_truncata	5.10566	20	3
Eana_argentana	Tortricidae	18	25	21.5	22.044	55.3044	38.6742	3	oligophagous	2	Open_landscape	intermediate				Eana_argentana	38.6742	3	2
Eana_canescana	Tortricidae	18	25	21.5	22.044	55.3044	38.6742	2	oligophagous	2	Open_landscape	intermediate				Eana_canescana	38.6742	2	2
Eana_incanana	Tortricidae	18	25	21.5	22.044	55.3044	38.6742	2	oligophagous	2	Open_landscape	intermediate				Eana_incanana	38.6742	2	2
Eana_osseana	Tortricidae	18	25	21.5	22.044	55.3044	38.6742	3	oligophagous	2	Open_landscape	intermediate				Eana_osseana	38.6742	3	2
Eana_penziana	Tortricidae	18	25	21.5	22.044	55.3044	38.6742	2	oligophagous	3	Open_landscape	sedentary				Eana_penziana	38.6742	2	3
Earias_clorana	Nolidae	12.5	16	14.25	14.8304	31.5306	23.1805	7	polyphagous	3	Open_landscape	intermediate				Earias_clorana	23.1805	7	3
Earophila_badiata	Geometridae	12	15	13.5	5.5068	9.76925	7.63803	3	oligophagous	2	Open_landscape	intermediate				Earophila_badiata	7.63803	3	2
Ebulea_crocealis	Crambidae	18	24	21	22.044	49.3309	35.6875	6	polyphagous	2	Open_landscape	intermediate				Ebulea_crocealis	35.6875	6	2
Ecliptopera_capitata	Geometridae	20	26	23	20.4564	40.1374	30.2969	6	polyphagous	2	Open_landscape	intermediate				Ecliptopera_capitata	30.2969	6	2
Ecliptopera_silaceata	Geometridae	10	13	11.5	3.44733	6.764	5.10566	3	oligophagous	4	Open_landscape	intermediate				Ecliptopera_silaceata	5.10566	3	4
Ecpyrrhorrhoe_rubiginalis	Crambidae	22	28	25	38.6644	75.9574	57.3109	3	oligophagous	2	Open_landscape	intermediate				Ecpyrrhorrhoe_rubiginalis	57.3109	3	2
Ectropis_crepuscularia	Geometridae	35	45	40	86.1378	164.28	125.209	50	polyphagous	2	Forest	intermediate				Ectropis_crepuscularia	125.209	50	2
Egira_conspicillaris	Noctuidae	17.5	22.5	20	44.9846	69.971	57.4778	ND	oligophagous	2	Forest	intermediate				Egira_conspicillaris	57.4778	6	2
Eilema_cereola	Erebidae	20	28	24	38.2673	87.7305	62.9989	10	polyphagous	2	Forest	intermediate				Eilema_cereola	62.9989	10	2
Eilema_complana	Erebidae	14	17.5	15.75	15.8807	27.5316	21.7062	4	oligophagous	4	Forest	intermediate				Eilema_complana	21.7062	4	4
Eilema_depressa	Erebidae	12.5	16	14.25	12.0091	22.0733	17.0412	4	oligophagous	4	Forest	intermediate				Eilema_depressa	17.0412	4	4
Eilema_griseola	Erebidae	15	20	17.5	18.8258	38.2673	28.5466	4	oligophagous	4	Forest	intermediate				Eilema_griseola	28.5466	4	4
Eilema_lurideola	Erebidae	14	17.5	15.75	15.8807	27.5316	21.7062	8	polyphagous	4	Forest	intermediate				Eilema_lurideola	21.7062	8	4
Eilema_lutarella	Erebidae	24	30	27	59.9892	104	81.9947	10	polyphagous	2	Forest	intermediate				Eilema_lutarella	81.9947	10	2
Eilema_sororcula	Erebidae	12.5	16	14.25	12.0091	22.0733	17.0412	2	oligophagous	3	Forest	intermediate				Eilema_sororcula	17.0412	2	3
Elaphria_venustula	Noctuidae	14	18	16	30.3889	47.2683	38.8286	3	oligophagous	2	Open_landscape	intermediate				Elaphria_venustula	38.8286	3	2
Electrophaes_corylata	Geometridae	11	14	12.5	4.40373	8.1825	6.29311	8	polyphagous	2	Forest	intermediate				Electrophaes_corylata	6.29311	8	2
Elophila_nymphaeata	Crambidae	23	30	26.5	43.7891	92.144	67.9665	6	polyphagous	1	Open_landscape	intermediate				Elophila_nymphaeata	67.9665	6	1
Elophos_caelibaria	Geometridae	28	36	32	48.5548	92.6028	70.5788	1	monophagous	3	Open_landscape	sedentary				Elophos_caelibaria	70.5788	1	3
Elophos_dilucidaria	Geometridae	28	36	32	48.5548	92.6028	70.5788	1	monophagous	3	Open_landscape	sedentary				Elophos_dilucidaria	70.5788	1	3
Elophos_operaria	Geometridae	28	36	32	48.5548	92.6028	70.5788	2	oligophagous	3	Open_landscape	sedentary				Elophos_operaria	70.5788	2	3
Elophos_serotinaria	Geometridae	28	36	32	48.5548	92.6028	70.5788	2	oligophagous	3	Open_landscape	sedentary				Elophos_serotinaria	70.5788	2	3
Elophos_vittaria	Geometridae	28	36	32	48.5548	92.6028	70.5788	1	monophagous	3	Open_landscape	sedentary				Elophos_vittaria	70.5788	1	3
Elophos_vittaria_mendicaria	Geometridae	28	36	32	48.5548	92.6028	70.5788	1	monophagous	3	Open_landscape	sedentary				Elophos_vittaria_mendicaria	70.5788	1	3
Elophos_zirbitzensis	Geometridae	28	36	32	48.5548	92.6028	70.5788	1	monophagous	3	Open_landscape	sedentary				Elophos_zirbitzensis	70.5788	1	3
Ematurga_atomaria	Geometridae	11	15	13	4.40373	9.76925	7.08649	10	polyphagous	4	Open_landscape	intermediate				Ematurga_atomaria	7.08649	10	4
Emmelia_trabealis	Noctuidae	18	24	21	47.2683	78.3767	62.8225	3	oligophagous	2	Open_landscape	intermediate				Emmelia_trabealis	62.8225	3	2
Enargia_paleacea	Noctuidae	15	20	17.5	34.3072	56.8856	45.5964	3	oligophagous	1	Forest	intermediate				Enargia_paleacea	45.5964	3	1
Enarmonia_formosana	Tortricidae	12	16	14	7.08329	15.8513	11.4673	2	oligophagous	2	Forest	intermediate				Enarmonia_formosana	11.4673	2	2
Endothenia_ericetana	Tortricidae	12	16	14	7.08329	15.8513	11.4673	1	monophagous	3	Open_landscape	intermediate				Endothenia_ericetana	11.4673	1	3
Endothenia_lapideana	Tortricidae	12	16	14	7.08329	15.8513	11.4673	2	oligophagous	2	Open_landscape	intermediate				Endothenia_lapideana	11.4673	2	2
Endothenia_marginana	Tortricidae	12	16	14	7.08329	15.8513	11.4673	2	oligophagous	2	Open_landscape	intermediate				Endothenia_marginana	11.4673	2	2
Endothenia_nigricostana	Tortricidae	12	16	14	7.08329	15.8513	11.4673	2	oligophagous	2	Open_landscape	intermediate				Endothenia_nigricostana	11.4673	2	2
Endothenia_oblongana	Tortricidae	12	16	14	7.08329	15.8513	11.4673	2	oligophagous	2	Open_landscape	intermediate				Endothenia_oblongana	11.4673	2	2
Endothenia_quadrimaculana	Tortricidae	12	16	14	7.08329	15.8513	11.4673	2	oligophagous	2	Open_landscape	intermediate				Endothenia_quadrimaculana	11.4673	2	2
Endothenia_ustulana	Tortricidae	12	16	14	7.08329	15.8513	11.4673	2	oligophagous	2	Open_landscape	intermediate				Endothenia_ustulana	11.4673	2	2
Ennomos_alniaria	Geometridae	20	25	22.5	20.4564	36.2903	28.3734	8	polyphagous	2	Forest	intermediate				Ennomos_alniaria	28.3734	8	2
Ennomos_autumnaria	Geometridae	20	27.5	23.75	20.4564	46.3584	33.4074	12	polyphagous	2	Forest	intermediate				Ennomos_autumnaria	33.4074	12	2
Ennomos_erosaria	Geometridae	17.5	25	21.25	14.516	36.2903	25.4032	4	oligophagous	1	Forest	intermediate				Ennomos_erosaria	25.4032	4	1
Ennomos_fuscantaria	Geometridae	20	27.5	23.75	20.4564	46.3584	33.4074	1	monophagous	1	Forest	intermediate				Ennomos_fuscantaria	33.4074	1	1
Ennomos_quercinaria	Geometridae	20	27.5	23.75	20.4564	46.3584	33.4074	8	polyphagous	2	Forest	intermediate				Ennomos_quercinaria	33.4074	8	2
Entephria_caeruleata	Geometridae	26	32	29	40.1374	68.4248	54.2811	2	oligophagous	3	Open_landscape	intermediate				Entephria_caeruleata	54.2811	2	3
Entephria_caesiata	Geometridae	10	13	11.5	3.44733	6.764	5.10566	6	polyphagous	1	Open_landscape	intermediate				Entephria_caesiata	5.10566	6	1
Entephria_cyanata	Geometridae	20	26	23	20.4564	40.1374	30.2969	3	oligophagous	3	Open_landscape	intermediate				Entephria_cyanata	30.2969	3	3
Entephria_flavata	Geometridae	20	26	23	20.4564	40.1374	30.2969	2	oligophagous	3	Open_landscape	intermediate				Entephria_flavata	30.2969	2	3
Entephria_flavicinctata	Geometridae	10	13	11.5	3.44733	6.764	5.10566	4	oligophagous	1	Open_landscape	sedentary				Entephria_flavicinctata	5.10566	4	1
Entephria_infidaria	Geometridae	20	26	23	20.4564	40.1374	30.2969	2	oligophagous	3	Open_landscape	sedentary				Entephria_infidaria	30.2969	2	3
Entephria_nobiliaria	Geometridae	20	26	23	20.4564	40.1374	30.2969	1	monophagous	3	Open_landscape	sedentary				Entephria_nobiliaria	30.2969	1	3
Epagoge_grotiana	Tortricidae	16	22	19	15.8513	38.6644	27.2578	3	oligophagous	2	Forest	intermediate				Epagoge_grotiana	27.2578	3	2
Epiblema_cirsiana	Tortricidae	12	16	14	7.08329	15.8513	11.4673	1	monophagous	2	Open_landscape	intermediate				Epiblema_cirsiana	11.4673	1	2
Epiblema_costipunctana	Tortricidae	12	16	14	7.08329	15.8513	11.4673	1	monophagous	2	Open_landscape	intermediate				Epiblema_costipunctana	11.4673	1	2
Epiblema_foenella	Tortricidae	12	16	14	7.08329	15.8513	11.4673	1	monophagous	2	Open_landscape	intermediate				Epiblema_foenella	11.4673	1	2
Epiblema_grandaevana	Tortricidae	14	20	17	10.9065	29.6082	20.2573	1	monophagous	3	Open_landscape	intermediate				Epiblema_grandaevana	20.2573	1	3
Epiblema_hepaticana	Tortricidae	14	20	17	10.9065	29.6082	20.2573	1	monophagous	2	Open_landscape	intermediate				Epiblema_hepaticana	20.2573	1	2
Epiblema_scutulana	Tortricidae	14	20	17	10.9065	29.6082	20.2573	2	oligophagous	2	Open_landscape	intermediate				Epiblema_scutulana	20.2573	2	2
Epiblema_similana	Tortricidae	14	20	17	10.9065	29.6082	20.2573	1	monophagous	2	Open_landscape	intermediate				Epiblema_similana	20.2573	1	2
Epiblema_simploniana	Tortricidae	12	16	14	7.08329	15.8513	11.4673	1	monophagous	3	Open_landscape	sedentary				Epiblema_simploniana	11.4673	1	3
Epiblema_sticticana	Tortricidae	14	20	17	10.9065	29.6082	20.2573	1	monophagous	2	Open_landscape	intermediate				Epiblema_sticticana	20.2573	1	2
Epiblema_turbidana	Tortricidae	12	16	14	7.08329	15.8513	11.4673	1	monophagous	2	Open_landscape	intermediate				Epiblema_turbidana	11.4673	1	2
Epilecta_linogrisea	Noctuidae	36	44	40	159.853	227.464	193.658	20	polyphagous	2	Open_landscape	intermediate				Epilecta_linogrisea	193.658	20	2
Epilobophora_sabinata	Geometridae	28	36	32	48.5548	92.6028	70.5788	1	monophagous	2	Forest	intermediate				Epilobophora_sabinata	70.5788	1	2
Epinotia_abbreviana	Tortricidae	12	16	14	7.08329	15.8513	11.4673	2	oligophagous	2	Forest	intermediate				Epinotia_abbreviana	11.4673	2	2
Epinotia_bilunana	Tortricidae	14	20	17	10.9065	29.6082	20.2573	2	oligophagous	2	Forest	intermediate				Epinotia_bilunana	20.2573	2	2
Epinotia_brunnichana	Tortricidae	14	20	17	10.9065	29.6082	20.2573	2	oligophagous	2	Forest	intermediate				Epinotia_brunnichana	20.2573	2	2
Epinotia_cinereana	Tortricidae	12	16	14	7.08329	15.8513	11.4673	2	oligophagous	2	Forest	intermediate				Epinotia_cinereana	11.4673	2	2
Epinotia_cruciana	Tortricidae	14	20	17	10.9065	29.6082	20.2573	2	oligophagous	2	Forest	intermediate				Epinotia_cruciana	20.2573	2	2
Epinotia_demarniana	Tortricidae	12	16	14	7.08329	15.8513	11.4673	1	monophagous	2	Forest	intermediate				Epinotia_demarniana	11.4673	1	2
Epinotia_fraternana	Tortricidae	12	16	14	7.08329	15.8513	11.4673	1	monophagous	2	Forest	intermediate				Epinotia_fraternana	11.4673	1	2
Epinotia_granitana	Tortricidae	12	16	14	7.08329	15.8513	11.4673	1	monophagous	2	Forest	intermediate				Epinotia_granitana	11.4673	1	2
Epinotia_huebneriana	Tortricidae	12	16	14	7.08329	15.8513	11.4673	1	monophagous	2	Forest	intermediate				Epinotia_huebneriana	11.4673	1	2
Epinotia_immundana	Tortricidae	12	16	14	7.08329	15.8513	11.4673	1	monophagous	2	Forest	intermediate				Epinotia_immundana	11.4673	1	2
Epinotia_maculana	Tortricidae	12	16	14	7.08329	15.8513	11.4673	2	oligophagous	2	Forest	intermediate				Epinotia_maculana	11.4673	2	2
Epinotia_mercuriana	Tortricidae	12	16	14	7.08329	15.8513	11.4673	1	monophagous	2	Forest	intermediate				Epinotia_mercuriana	11.4673	1	2
Epinotia_nanana	Tortricidae	14	20	17	10.9065	29.6082	20.2573	1	monophagous	2	Forest	intermediate				Epinotia_nanana	20.2573	1	2
Epinotia_nemorivaga	Tortricidae	12	16	14	7.08329	15.8513	11.4673	1	monophagous	2	Forest	intermediate				Epinotia_nemorivaga	11.4673	1	2
Epinotia_nigricana	Tortricidae	12	16	14	7.08329	15.8513	11.4673	1	monophagous	1	Forest	intermediate				Epinotia_nigricana	11.4673	1	1
Epinotia_nisella	Tortricidae	12	16	14	7.08329	15.8513	11.4673	2	oligophagous	1	Forest	intermediate				Epinotia_nisella	11.4673	2	1
Epinotia_pusillana	Tortricidae	10	14	12	4.25136	10.9065	7.57894	1	monophagous	1	Forest	intermediate				Epinotia_pusillana	7.57894	1	1
Epinotia_pygmaeana	Tortricidae	10	14	12	4.25136	10.9065	7.57894	1	monophagous	1	Forest	intermediate				Epinotia_pygmaeana	7.57894	1	1
Epinotia_ramella	Tortricidae	14	20	17	10.9065	29.6082	20.2573	2	oligophagous	2	Forest	intermediate				Epinotia_ramella	20.2573	2	2
Epinotia_rhomboidella	Tortricidae	12	16	14	7.08329	15.8513	11.4673	2	oligophagous	2	Forest	intermediate				Epinotia_rhomboidella	11.4673	2	2
Epinotia_rubiginosana	Tortricidae	12	16	14	7.08329	15.8513	11.4673	2	oligophagous	2	Forest	intermediate				Epinotia_rubiginosana	11.4673	2	2
Epinotia_signatana	Tortricidae	14	20	17	10.9065	29.6082	20.2573	1	monophagous	2	Forest	intermediate				Epinotia_signatana	20.2573	1	2
Epinotia_solandriana	Tortricidae	12	16	14	7.08329	15.8513	11.4673	3	oligophagous	2	Forest	intermediate				Epinotia_solandriana	11.4673	3	2
Epinotia_sordidana	Tortricidae	12	16	14	7.08329	15.8513	11.4673	1	monophagous	2	Forest	intermediate				Epinotia_sordidana	11.4673	1	2
Epinotia_subocellana	Tortricidae	12	16	14	7.08329	15.8513	11.4673	1	monophagous	2	Forest	intermediate				Epinotia_subocellana	11.4673	1	2
Epinotia_subsequana	Tortricidae	12	16	14	7.08329	15.8513	11.4673	1	monophagous	2	Forest	intermediate				Epinotia_subsequana	11.4673	1	2
Epinotia_tedella	Tortricidae	14	20	17	10.9065	29.6082	20.2573	1	monophagous	1	Forest	intermediate				Epinotia_tedella	20.2573	1	1
Epinotia_tenerana	Tortricidae	12	16	14	7.08329	15.8513	11.4673	2	oligophagous	2	Forest	intermediate				Epinotia_tenerana	11.4673	2	2
Epinotia_tetraquetrana	Tortricidae	14	20	17	10.9065	29.6082	20.2573	1	monophagous	2	Forest	intermediate				Epinotia_tetraquetrana	20.2573	1	2
Epinotia_thapsiana	Tortricidae	14	20	17	10.9065	29.6082	20.2573	1	monophagous	2	Forest	intermediate				Epinotia_thapsiana	20.2573	1	2
Epinotia_trigonella	Tortricidae	14	20	17	10.9065	29.6082	20.2573	1	monophagous	2	Forest	intermediate				Epinotia_trigonella	20.2573	1	2
Epione_repandaria	Geometridae	15	20	17.5	9.76925	20.4564	15.1128	4	oligophagous	3	Forest	intermediate				Epione_repandaria	15.1128	4	3
Epione_vespertaria	Geometridae	15	20	17.5	9.76925	20.4564	15.1128	2	oligophagous	2	Forest	intermediate				Epione_vespertaria	15.1128	2	2
Epipsilia_grisescens	Noctuidae	35	45	40	152.13	236.629	194.38	1	monophagous	3	Open_landscape	sedentary				Epipsilia_grisescens	194.38	1	3
Epipsilia_latens	Noctuidae	35	45	40	152.13	236.629	194.38	1	monophagous	3	Open_landscape	sedentary				Epipsilia_latens	194.38	1	3
Epirrhoe_alternata	Geometridae	10	13	11.5	3.44733	6.764	5.10566	4	oligophagous	4	Open_landscape	intermediate				Epirrhoe_alternata	5.10566	4	4
Epirrhoe_galiata	Geometridae	10	13	11.5	3.44733	6.764	5.10566	3	oligophagous	2	Open_landscape	intermediate				Epirrhoe_galiata	5.10566	3	2
Epirrhoe_hastulata	Geometridae	20	26	23	20.4564	40.1374	30.2969	3	oligophagous	2	Open_landscape	intermediate				Epirrhoe_hastulata	30.2969	3	2
Epirrhoe_molluginata	Geometridae	20	26	23	20.4564	40.1374	30.2969	2	oligophagous	2	Open_landscape	intermediate				Epirrhoe_molluginata	30.2969	2	2
Epirrhoe_rivata	Geometridae	10	13	11.5	3.44733	6.764	5.10566	2	oligophagous	2	Open_landscape	intermediate				Epirrhoe_rivata	5.10566	2	2
Epirrhoe_tristata	Geometridae	10	13	11.5	3.44733	6.764	5.10566	1	monophagous	2	Open_landscape	intermediate				Epirrhoe_tristata	5.10566	1	2
Epirrita_autumnata	Geometridae	15	20	17.5	9.76925	20.4564	15.1128	7	polyphagous	3	Forest	intermediate				Epirrita_autumnata	15.1128	7	3
Epirrita_christyi	Geometridae	15	20	17.5	9.76925	20.4564	15.1128	10	polyphagous	1	Forest	intermediate				Epirrita_christyi	15.1128	10	1
Epirrita_dilutata	Geometridae	15	20	17.5	9.76925	20.4564	15.1128	14	polyphagous	2	Forest	intermediate				Epirrita_dilutata	15.1128	14	2
Erannis_defoliaria	Geometridae	17.5	25	21.25	14.516	36.2903	25.4032	20	polyphagous	2	Forest	intermediate				Erannis_defoliaria	25.4032	20	2
Erebia_aethiops	Nymphalidae	35	45	40	211.528	422.198	316.863	7	polyphagous	3	Open_landscape	sedentary				Erebia_aethiops	316.863	7	3
Erebia_alberganus	Nymphalidae	30	36	33	138.441	228.567	183.504	2	oligophagous	3	Open_landscape	sedentary				Erebia_alberganus	183.504	2	3
Erebia_cassioides	Nymphalidae	30	38	34	138.441	265.208	201.824	1	monophagous	3	Open_landscape	sedentary				Erebia_cassioides	201.824	1	3
Erebia_claudina	Nymphalidae	28	34	31	114.516	195.321	154.918	1	monophagous	3	Open_landscape	sedentary				Erebia_claudina	154.918	1	3
Erebia_epiphron	Nymphalidae	30	36	33	138.441	228.567	183.504	1	monophagous	2	Open_landscape	sedentary				Erebia_epiphron	183.504	1	2
Erebia_eriphyle	Nymphalidae	30	36	33	138.441	228.567	183.504	2	oligophagous	3	Open_landscape	sedentary				Erebia_eriphyle	183.504	2	3
Erebia_euryale	Nymphalidae	35	45	40	211.528	422.198	316.863	3	oligophagous	3	Open_landscape	sedentary				Erebia_euryale	316.863	3	3
Erebia_gorge	Nymphalidae	32	40	36	165.327	305.384	235.355	1	monophagous	3	Open_landscape	sedentary				Erebia_gorge	235.355	1	3
Erebia_ligea	Nymphalidae	40	50	45	305.384	564.09	434.737	3	oligophagous	3	Forest	intermediate				Erebia_ligea	434.737	3	3
Erebia_manto	Nymphalidae	35	45	40	211.528	422.198	316.863	2	oligophagous	3	Open_landscape	sedentary				Erebia_manto	316.863	2	3
Erebia_medusa	Nymphalidae	35	45	40	211.528	422.198	316.863	4	oligophagous	3	Open_landscape	intermediate				Erebia_medusa	316.863	4	3
Erebia_melampus	Nymphalidae	30	40	35	138.441	305.384	221.912	1	monophagous	3	Open_landscape	sedentary				Erebia_melampus	221.912	1	3
Erebia_meolans	Nymphalidae	30	38	34	138.441	265.208	201.824	2	oligophagous	3	Open_landscape	sedentary				Erebia_meolans	201.824	2	3
Erebia_nivalis	Nymphalidae	30	36	33	138.441	228.567	183.504	1	monophagous	3	Open_landscape	sedentary				Erebia_nivalis	183.504	1	3
Erebia_oeme	Nymphalidae	28	34	31	114.516	195.321	154.918	2	oligophagous	3	Open_landscape	sedentary				Erebia_oeme	154.918	2	3
Erebia_pandrose	Nymphalidae	32	38	35	165.327	265.208	215.267	1	monophagous	3	Open_landscape	sedentary				Erebia_pandrose	215.267	1	3
Erebia_pharte	Nymphalidae	30	36	33	138.441	228.567	183.504	2	oligophagous	3	Open_landscape	sedentary				Erebia_pharte	183.504	2	3
Erebia_pluto	Nymphalidae	28	34	31	114.516	195.321	154.918	1	monophagous	3	Open_landscape	sedentary				Erebia_pluto	154.918	1	3
Erebia_pronoe	Nymphalidae	32	40	36	165.327	305.384	235.355	2	oligophagous	3	Open_landscape	sedentary				Erebia_pronoe	235.355	2	3
Erebia_styx	Nymphalidae	30	36	33	138.441	228.567	183.504	1	monophagous	3	Open_landscape	sedentary				Erebia_styx	183.504	1	3
Eriogaster_arbusculae	Lasiocampidae	30	45	37.5	215.442	743.756	479.599	6	polyphagous	3	Open_landscape	sedentary				Eriogaster_arbusculae	479.599	6	3
Eriogaster_lanestris	Lasiocampidae	15	20	17.5	25.9086	62.4067	44.1577	3	oligophagous	1	Open_landscape	intermediate				Eriogaster_lanestris	44.1577	3	1
Eriopsela_quadrana	Tortricidae	14	20	17	10.9065	29.6082	20.2573	1	monophagous	0	Open_landscape	intermediate				Eriopsela_quadrana	20.2573	1	0
Eriopygodes_imbecilla	Noctuidae	15	20	17.5	34.3072	56.8856	45.5964	2	oligophagous	2	Forest	intermediate				Eriopygodes_imbecilla	45.5964	2	2
Erynnis_tages	Hesperiidae	24	32	28	10.6562	23.1705	16.9133	1	monophagous	3	Open_landscape	intermediate				Erynnis_tages	16.9133	1	3
Eublemma_parva	Erebidae	9	12	10.5	5.34219	10.8591	8.10064	2	oligophagous	1	Open_landscape	intermediate				Eublemma_parva	8.10064	2	1
Euchalcia_variabilis	Noctuidae	15	20	17.5	34.3072	56.8856	45.5964	ND	oligophagous	3	Open_landscape	sedentary				Euchalcia_variabilis	45.5964	6	3
Euchoeca_nebulata	Geometridae	10	13	11.5	3.44733	6.764	5.10566	1	monophagous	3	Forest	intermediate				Euchoeca_nebulata	5.10566	1	3
Euclidia_glyphica	Erebidae	12.5	15	13.75	12.0091	18.8258	15.4174	5	oligophagous	3	Open_landscape	intermediate				Euclidia_glyphica	15.4174	5	3
Euclidia_mi	Erebidae	12.5	15	13.75	12.0091	18.8258	15.4174	3	oligophagous	3	Open_landscape	intermediate				Euclidia_mi	15.4174	3	3
Eucosma_aemulana	Tortricidae	12	16	14	7.08329	15.8513	11.4673	1	monophagous	0	Open_landscape	intermediate				Eucosma_aemulana	11.4673	1	0
Eucosma_aspidiscana	Tortricidae	12	16	14	7.08329	15.8513	11.4673	1	monophagous	0	Open_landscape	intermediate				Eucosma_aspidiscana	11.4673	1	0
Eucosma_campoliliana	Tortricidae	12	18	15	7.08329	22.044	14.5637	1	monophagous	0	Open_landscape	intermediate				Eucosma_campoliliana	14.5637	1	0
Eucosma_cana	Tortricidae	12	18	15	7.08329	22.044	14.5637	2	oligophagous	0	Open_landscape	intermediate				Eucosma_cana	14.5637	2	0
Eucosma_conterminana	Tortricidae	12	16	14	7.08329	15.8513	11.4673	1	monophagous	0	Open_landscape	intermediate				Eucosma_conterminana	11.4673	1	0
Eucosma_fervidana	Tortricidae	12	16	14	7.08329	15.8513	11.4673	1	monophagous	0	Open_landscape	intermediate				Eucosma_fervidana	11.4673	1	0
Eucosma_hohenwartiana	Tortricidae	12	18	15	7.08329	22.044	14.5637	1	monophagous	0	Open_landscape	intermediate				Eucosma_hohenwartiana	14.5637	1	0
Eucosma_obumbratana	Tortricidae	12	16	14	7.08329	15.8513	11.4673	1	monophagous	0	Open_landscape	intermediate				Eucosma_obumbratana	11.4673	1	0
Eucosma_parvulana	Tortricidae	12	16	14	7.08329	15.8513	11.4673	1	monophagous	0	Open_landscape	intermediate				Eucosma_parvulana	11.4673	1	0
Eucosma_pupillana	Tortricidae	12	16	14	7.08329	15.8513	11.4673	1	monophagous	0	Open_landscape	intermediate				Eucosma_pupillana	11.4673	1	0
Eucosmomorpha_albersana	Tortricidae	12	16	14	7.08329	15.8513	11.4673	1	monophagous	0	Open_landscape	intermediate				Eucosmomorpha_albersana	11.4673	1	0
Eudemis_porphyrana	Tortricidae	16	22	19	15.8513	38.6644	27.2578	2	oligophagous	0	Forest	intermediate				Eudemis_porphyrana	27.2578	2	0
Eudemis_profundana	Tortricidae	16	22	19	15.8513	38.6644	27.2578	1	monophagous	0	Forest	intermediate				Eudemis_profundana	27.2578	1	0
Eudonia_delunella	Crambidae	18	24	21	22.044	49.3309	35.6875	10	polyphagous	2	Open_landscape	intermediate				Eudonia_delunella	35.6875	10	2
Eudonia_lacustrata	Crambidae	17	23	20	18.7838	43.7891	31.2864	10	polyphagous	2	Open_landscape	intermediate				Eudonia_lacustrata	31.2864	10	2
Eudonia_laetella	Crambidae	18	24	21	22.044	49.3309	35.6875	10	polyphagous	2	Open_landscape	intermediate				Eudonia_laetella	35.6875	10	2
Eudonia_mercurella	Crambidae	18	24	21	22.044	49.3309	35.6875	10	polyphagous	2	Open_landscape	intermediate				Eudonia_mercurella	35.6875	10	2
Eudonia_murana	Crambidae	18	24	21	22.044	49.3309	35.6875	10	polyphagous	2	Open_landscape	intermediate				Eudonia_murana	35.6875	10	2
Eudonia_pallida	Crambidae	18	24	21	22.044	49.3309	35.6875	10	polyphagous	2	Open_landscape	intermediate				Eudonia_pallida	35.6875	10	2
Eudonia_petrophila	Crambidae	18	24	21	22.044	49.3309	35.6875	10	polyphagous	3	Open_landscape	intermediate				Eudonia_petrophila	35.6875	10	3
Eudonia_phaeoleuca	Crambidae	18	24	21	22.044	49.3309	35.6875	10	polyphagous	3	Open_landscape	sedentary				Eudonia_phaeoleuca	35.6875	10	3
Eudonia_sudetica	Crambidae	18	24	21	22.044	49.3309	35.6875	10	polyphagous	3	Open_landscape	intermediate				Eudonia_sudetica	35.6875	10	3
Eudonia_truncicolella	Crambidae	18	24	21	22.044	49.3309	35.6875	10	polyphagous	2	Open_landscape	intermediate				Eudonia_truncicolella	35.6875	10	2
Eudonia_vallesialis	Crambidae	18	24	21	22.044	49.3309	35.6875	10	polyphagous	3	Open_landscape	sedentary				Eudonia_vallesialis	35.6875	10	3
Eugnorisma_depuncta	Noctuidae	17.5	22.5	20	44.9846	69.971	57.4778	8	polyphagous	1	Open_landscape	intermediate				Eugnorisma_depuncta	57.4778	8	1
Eugraphe_sigma	Noctuidae	35	45	40	152.13	236.629	194.38	20	polyphagous	3	Open_landscape	intermediate				Eugraphe_sigma	194.38	20	3
Eulia_ministrana	Tortricidae	18	25	21.5	22.044	55.3044	38.6742	3	oligophagous	0	Forest	intermediate				Eulia_ministrana	38.6742	3	0
Eulithis_mellinata	Geometridae	12.5	16	14.25	6.11568	11.531	8.82334	3	oligophagous	2	Open_landscape	intermediate				Eulithis_mellinata	8.82334	3	2
Eulithis_populata	Geometridae	11	14	12.5	4.40373	8.1825	6.29311	4	oligophagous	3	Forest	intermediate				Eulithis_populata	6.29311	4	3
Eulithis_prunata	Geometridae	12.5	16	14.25	6.11568	11.531	8.82334	3	oligophagous	2	Forest	intermediate				Eulithis_prunata	8.82334	3	2
Eulithis_testata	Geometridae	12.5	16	14.25	6.11568	11.531	8.82334	4	oligophagous	3	Forest	intermediate				Eulithis_testata	8.82334	4	3
Eumedonia_eumedon	Lycaenidae	26	34	30	71.618	143.859	107.738	3	oligophagous	3	Open_landscape	sedentary				Eumedonia_eumedon	107.738	3	3
Euphydryas_aurinia	Nymphalidae	30	42	36	138.441	349.234	243.838	3	oligophagous	3	Open_landscape	sedentary				Euphydryas_aurinia	243.838	3	3
Euphydryas_aurinia_glaciegenita	Nymphalidae	30	40	35	138.441	305.384	221.912	2	oligophagous	3	Open_landscape	sedentary				Euphydryas_aurinia_glaciegenita	221.912	2	3
Euphydryas_cynthia	Nymphalidae	32	44	38	165.327	396.895	281.111	1	monophagous	3	Open_landscape	sedentary				Euphydryas_cynthia	281.111	1	3
Euphydryas_intermedia	Nymphalidae	32	44	38	165.327	396.895	281.111	1	monophagous	3	Open_landscape	sedentary				Euphydryas_intermedia	281.111	1	3
Euphydryas_maturna	Nymphalidae	40	50	45	305.384	564.09	434.737	3	oligophagous	2	Forest	sedentary				Euphydryas_maturna	434.737	3	2
Euphyia_adumbraria	Geometridae	20	26	23	20.4564	40.1374	30.2969	1	monophagous	3	Open_landscape	intermediate				Euphyia_adumbraria	30.2969	1	3
Euphyia_biangulata	Geometridae	12	15	13.5	5.5068	9.76925	7.63803	3	oligophagous	3	Open_landscape	intermediate				Euphyia_biangulata	7.63803	3	3
Euphyia_scripturata	Geometridae	20	26	23	20.4564	40.1374	30.2969	2	oligophagous	2	Open_landscape	intermediate				Euphyia_scripturata	30.2969	2	2
Euphyia_unangulata	Geometridae	11	14	12.5	4.40373	8.1825	6.29311	ND	oligophagous	2	Open_landscape	intermediate				Euphyia_unangulata	6.29311	6	2
Eupithecia_abietaria	Geometridae	9	12	10.5	2.62986	5.5068	4.06833	5	oligophagous	2	Forest	intermediate				Eupithecia_abietaria	4.06833	5	2
Eupithecia_absinthiata	Geometridae	9	12	10.5	2.62986	5.5068	4.06833	16	polyphagous	4	Open_landscape	intermediate				Eupithecia_absinthiata	4.06833	16	4
Eupithecia_actaeata	Geometridae	16	22	19	11.531	26.1316	18.8313	3	oligophagous	3	Forest	intermediate				Eupithecia_actaeata	18.8313	3	3
Eupithecia_analoga	Geometridae	18	24	21	15.6055	32.6773	24.1414	3	oligophagous	2	Open_landscape	intermediate				Eupithecia_analoga	24.1414	3	2
Eupithecia_assimilata	Geometridae	8	11	9.5	1.94322	4.40373	3.17347	4	oligophagous	2	Both	intermediate				Eupithecia_assimilata	3.17347	4	2
Eupithecia_cauchiata	Geometridae	16	22	19	11.531	26.1316	18.8313	3	oligophagous	3	Open_landscape	intermediate				Eupithecia_cauchiata	18.8313	3	3
Eupithecia_centaureata	Geometridae	9	12	10.5	2.62986	5.5068	4.06833	19	polyphagous	4	Open_landscape	intermediate				Eupithecia_centaureata	4.06833	19	4
Eupithecia_conterminata	Geometridae	16	22	19	11.531	26.1316	18.8313	3	oligophagous	2	Forest	sedentary				Eupithecia_conterminata	18.8313	3	2
Eupithecia_denotata	Geometridae	9	12	10.5	2.62986	5.5068	4.06833	4	oligophagous	2	Open_landscape	intermediate				Eupithecia_denotata	4.06833	4	2
Eupithecia_distinctaria	Geometridae	9	12	10.5	2.62986	5.5068	4.06833	1	monophagous	1	Open_landscape	intermediate				Eupithecia_distinctaria	4.06833	1	1
Eupithecia_egenaria	Geometridae	7	10	8.5	1.37892	3.44733	2.41313	3	oligophagous	1	Forest	intermediate				Eupithecia_egenaria	2.41313	3	1
Eupithecia_ericeata	Geometridae	16	22	19	11.531	26.1316	18.8313	3	oligophagous	3	Open_landscape	sedentary				Eupithecia_ericeata	18.8313	3	3
Eupithecia_exiguata	Geometridae	9	12	10.5	2.62986	5.5068	4.06833	20	polyphagous	2	Forest	intermediate				Eupithecia_exiguata	4.06833	20	2
Eupithecia_expallidata	Geometridae	9	12	10.5	2.62986	5.5068	4.06833	1	monophagous	2	Open_landscape	intermediate				Eupithecia_expallidata	4.06833	1	2
Eupithecia_extraversaria	Geometridae	18	24	21	15.6055	32.6773	24.1414	3	oligophagous	2	Open_landscape	intermediate				Eupithecia_extraversaria	24.1414	3	2
Eupithecia_haworthiata	Geometridae	9	12	10.5	2.62986	5.5068	4.06833	1	monophagous	2	Open_landscape	intermediate				Eupithecia_haworthiata	4.06833	1	2
Eupithecia_icterata	Geometridae	9	12	10.5	2.62986	5.5068	4.06833	1	monophagous	3	Open_landscape	intermediate				Eupithecia_icterata	4.06833	1	3
Eupithecia_immundata	Geometridae	18	24	21	15.6055	32.6773	24.1414	3	oligophagous	2	Forest	sedentary				Eupithecia_immundata	24.1414	3	2
Eupithecia_impurata	Geometridae	18	24	21	15.6055	32.6773	24.1414	3	oligophagous	2	Open_landscape	intermediate				Eupithecia_impurata	24.1414	3	2
Eupithecia_indigata	Geometridae	8	11	9.5	1.94322	4.40373	3.17347	2	oligophagous	2	Forest	intermediate				Eupithecia_indigata	3.17347	2	2
Eupithecia_innotata	Geometridae	9	12	10.5	2.62986	5.5068	4.06833	6	polyphagous	2	Open_landscape	intermediate				Eupithecia_innotata	4.06833	6	2
Eupithecia_intricata	Geometridae	9	12	10.5	2.62986	5.5068	4.06833	6	polyphagous	4	Forest	sedentary				Eupithecia_intricata	4.06833	6	4
Eupithecia_inturbata	Geometridae	8	11	9.5	1.94322	4.40373	3.17347	1	monophagous	2	Forest	intermediate				Eupithecia_inturbata	3.17347	1	2
Eupithecia_lanceata	Geometridae	18	24	21	15.6055	32.6773	24.1414	3	oligophagous	2	Forest	intermediate				Eupithecia_lanceata	24.1414	3	2
Eupithecia_laquaearia	Geometridae	16	22	19	11.531	26.1316	18.8313	3	oligophagous	3	Open_landscape	intermediate				Eupithecia_laquaearia	18.8313	3	3
Eupithecia_lariciata	Geometridae	9	12	10.5	2.62986	5.5068	4.06833	1	monophagous	2	Forest	sedentary				Eupithecia_lariciata	4.06833	1	2
Eupithecia_linariata	Geometridae	8	11	9.5	1.94322	4.40373	3.17347	1	monophagous	1	Open_landscape	intermediate				Eupithecia_linariata	3.17347	1	1
Eupithecia_millefoliata	Geometridae	8	11	9.5	1.94322	4.40373	3.17347	1	monophagous	1	Open_landscape	intermediate				Eupithecia_millefoliata	3.17347	1	1
Eupithecia_nanata	Geometridae	9	12	10.5	2.62986	5.5068	4.06833	2	oligophagous	2	Open_landscape	sedentary				Eupithecia_nanata	4.06833	2	2
Eupithecia_pernotata	Geometridae	16	22	19	11.531	26.1316	18.8313	3	oligophagous	3	Open_landscape	sedentary				Eupithecia_pernotata	18.8313	3	3
Eupithecia_pimpinellata	Geometridae	8	11	9.5	1.94322	4.40373	3.17347	1	monophagous	1	Open_landscape	intermediate				Eupithecia_pimpinellata	3.17347	1	1
Eupithecia_plumbeolata	Geometridae	9	12	10.5	2.62986	5.5068	4.06833	1	monophagous	2	Open_landscape	intermediate				Eupithecia_plumbeolata	4.06833	1	2
Eupithecia_pusillata	Geometridae	9	12	10.5	2.62986	5.5068	4.06833	4	oligophagous	2	Forest	intermediate				Eupithecia_pusillata	4.06833	4	2
Eupithecia_pyreneata	Geometridae	16	22	19	11.531	26.1316	18.8313	3	oligophagous	3	Open_landscape	sedentary				Eupithecia_pyreneata	18.8313	3	3
Eupithecia_satyrata	Geometridae	9	12	10.5	2.62986	5.5068	4.06833	20	polyphagous	3	Open_landscape	intermediate				Eupithecia_satyrata	4.06833	20	3
Eupithecia_selinata	Geometridae	18	24	21	15.6055	32.6773	24.1414	3	oligophagous	2	Open_landscape	intermediate				Eupithecia_selinata	24.1414	3	2
Eupithecia_semigraphata	Geometridae	18	24	21	15.6055	32.6773	24.1414	3	oligophagous	2	Open_landscape	intermediate				Eupithecia_semigraphata	24.1414	3	2
Eupithecia_silenata	Geometridae	16	22	19	11.531	26.1316	18.8313	3	oligophagous	2	Open_landscape	sedentary				Eupithecia_silenata	18.8313	3	2
Eupithecia_sinuosaria	Geometridae	9	12	10.5	2.62986	5.5068	4.06833	ND	oligophagous	2	Open_landscape	intermediate				Eupithecia_sinuosaria	4.06833	6	2
Eupithecia_subfuscata	Geometridae	9	12	10.5	2.62986	5.5068	4.06833	20	polyphagous	3	Forest	intermediate				Eupithecia_subfuscata	4.06833	20	3
Eupithecia_subumbrata	Geometridae	9	12	10.5	2.62986	5.5068	4.06833	9	polyphagous	4	Open_landscape	intermediate				Eupithecia_subumbrata	4.06833	9	4
Eupithecia_succenturiata	Geometridae	8	11	9.5	1.94322	4.40373	3.17347	7	polyphagous	1	Open_landscape	intermediate				Eupithecia_succenturiata	3.17347	7	1
Eupithecia_tantillaria	Geometridae	8	11	9.5	1.94322	4.40373	3.17347	3	oligophagous	2	Open_landscape	intermediate				Eupithecia_tantillaria	3.17347	3	2
Eupithecia_tenuiata	Geometridae	8	11	9.5	1.94322	4.40373	3.17347	4	oligophagous	3	Forest	intermediate				Eupithecia_tenuiata	3.17347	4	3
Eupithecia_thalictrata	Geometridae	16	22	19	11.531	26.1316	18.8313	3	oligophagous	2	Open_landscape	intermediate				Eupithecia_thalictrata	18.8313	3	2
Eupithecia_tripunctaria	Geometridae	9	12	10.5	2.62986	5.5068	4.06833	7	polyphagous	3	Open_landscape	intermediate				Eupithecia_tripunctaria	4.06833	7	3
Eupithecia_trisignaria	Geometridae	9	12	10.5	2.62986	5.5068	4.06833	2	oligophagous	4	Open_landscape	intermediate				Eupithecia_trisignaria	4.06833	2	4
Eupithecia_undata	Geometridae	16	22	19	11.531	26.1316	18.8313	3	oligophagous	2	Forest	intermediate				Eupithecia_undata	18.8313	3	2
Eupithecia_valerianata	Geometridae	9	12	10.5	2.62986	5.5068	4.06833	2	oligophagous	4	Open_landscape	intermediate				Eupithecia_valerianata	4.06833	2	4
Eupithecia_venosata	Geometridae	9	12	10.5	2.62986	5.5068	4.06833	7	polyphagous	1	Open_landscape	intermediate				Eupithecia_venosata	4.06833	7	1
Eupithecia_veratraria	Geometridae	18	24	21	15.6055	32.6773	24.1414	3	oligophagous	3	Open_landscape	sedentary				Eupithecia_veratraria	24.1414	3	3
Eupithecia_virgaureata	Geometridae	8	11	9.5	1.94322	4.40373	3.17347	20	polyphagous	3	Open_landscape	intermediate				Eupithecia_virgaureata	3.17347	20	3
Eupithecia_vulgata	Geometridae	9	12	10.5	2.62986	5.5068	4.06833	12	polyphagous	4	Both	intermediate				Eupithecia_vulgata	4.06833	12	4
Euplagia_quadripunctaria	Erebidae	22.5	30	26.25	51.1635	104	77.5818	15	polyphagous	1	Both	intermediate				Euplagia_quadripunctaria	77.5818	15	1
Euplexia_lucipara	Noctuidae	15	20	17.5	34.3072	56.8856	45.5964	14	polyphagous	4	Forest	intermediate				Euplexia_lucipara	45.5964	14	4
Eupoecilia_ambiguella	Tortricidae	12	18	15	7.08329	22.044	14.5637	2	oligophagous	0	Open_landscape	intermediate				Eupoecilia_ambiguella	14.5637	2	0
Eupoecilia_angustana	Tortricidae	14	20	17	10.9065	29.6082	20.2573	2	oligophagous	0	Open_landscape	intermediate				Eupoecilia_angustana	20.2573	2	0
Eupoecilia_sanguisorbana	Tortricidae	12	18	15	7.08329	22.044	14.5637	1	monophagous	0	Open_landscape	intermediate				Eupoecilia_sanguisorbana	14.5637	1	0
Euproctis_chrysorrhoea	Erebidae	15	20	17.5	18.8258	38.2673	28.5466	20	polyphagous	1	Open_landscape	intermediate				Euproctis_chrysorrhoea	28.5466	20	1
Euproctis_similis	Erebidae	15	20	17.5	18.8258	38.2673	28.5466	20	polyphagous	2	Open_landscape	intermediate				Euproctis_similis	28.5466	20	2
Eupsilia_transversa	Noctuidae	17.5	22.5	20	44.9846	69.971	57.4778	14	polyphagous	2	Forest	intermediate				Eupsilia_transversa	57.4778	14	2
Eurois_occulta	Noctuidae	17.5	22.5	20	44.9846	69.971	57.4778	9	polyphagous	4	Open_landscape	sedentary				Eurois_occulta	57.4778	9	4
Eurrhypis_pollinalis	Crambidae	18	24	21	22.044	49.3309	35.6875	6	polyphagous	2	Open_landscape	intermediate				Eurrhypis_pollinalis	35.6875	6	2
Eustroma_reticulata	Geometridae	10	13	11.5	3.44733	6.764	5.10566	1	monophagous	3	Forest	intermediate				Eustroma_reticulata	5.10566	1	3
Euthrix_potatoria	Lasiocampidae	22.5	32.5	27.5	89.4424	275.142	182.292	15	polyphagous	4	Open_landscape	intermediate				Euthrix_potatoria	182.292	15	4
Euxoa_aquilina	Noctuidae	32	40	36	129.958	192.377	161.168	2	oligophagous	3	Open_landscape	intermediate				Euxoa_aquilina	161.168	2	3
Euxoa_birivia	Noctuidae	35	45	40	152.13	236.629	194.38	2	oligophagous	3	Open_landscape	sedentary				Euxoa_birivia	194.38	2	3
Euxoa_culminicola	Noctuidae	35	45	40	152.13	236.629	194.38	1	monophagous	3	Open_landscape	sedentary				Euxoa_culminicola	194.38	1	3
Euxoa_decora	Noctuidae	35	45	40	152.13	236.629	194.38	2	oligophagous	3	Open_landscape	sedentary				Euxoa_decora	194.38	2	3
Euxoa_nigricans	Noctuidae	17.5	22.5	20	44.9846	69.971	57.4778	4	oligophagous	1	Open_landscape	intermediate				Euxoa_nigricans	57.4778	4	1
Euxoa_obelisca	Noctuidae	15	19	17	34.3072	51.981	43.1441	2	oligophagous	1	Open_landscape	intermediate				Euxoa_obelisca	43.1441	2	1
Euxoa_recussa	Noctuidae	35	45	40	152.13	236.629	194.38	2	oligophagous	3	Open_landscape	intermediate				Euxoa_recussa	194.38	2	3
Euxoa_tritici	Noctuidae	16	20	18	38.4285	56.8856	47.6571	5	oligophagous	1	Open_landscape	intermediate				Euxoa_tritici	47.6571	5	1
Evergestis_aenealis	Crambidae	18	24	21	22.044	49.3309	35.6875	6	polyphagous	2	Open_landscape	intermediate				Evergestis_aenealis	35.6875	6	2
Evergestis_extimalis	Crambidae	20	26	23	29.6082	61.7238	45.666	6	polyphagous	2	Open_landscape	intermediate				Evergestis_extimalis	45.666	6	2
Evergestis_forficalis	Crambidae	22	28	25	38.6644	75.9574	57.3109	15	polyphagous	2	Open_landscape	intermediate				Evergestis_forficalis	57.3109	15	2
Evergestis_limbata	Crambidae	20	26	23	29.6082	61.7238	45.666	6	polyphagous	2	Open_landscape	intermediate				Evergestis_limbata	45.666	6	2
Evergestis_pallidata	Crambidae	18	24	21	22.044	49.3309	35.6875	6	polyphagous	2	Open_landscape	intermediate				Evergestis_pallidata	35.6875	6	2
Evergestis_sophialis	Crambidae	18	25	21.5	22.044	55.3044	38.6742	6	polyphagous	2	Open_landscape	intermediate				Evergestis_sophialis	38.6742	6	2
Exaeretia_ciniflonella	Depressariidae	18	24	21	22.044	49.3309	35.6875	6	polyphagous	2	Open_landscape	intermediate				Exaeretia_ciniflonella	35.6875	6	2
Exapate_duratella	Tortricidae	16	22	19	15.8513	38.6644	27.2578	3	oligophagous	0	Forest	sedentary				Exapate_duratella	27.2578	3	0
Fabriciana_adippe	Nymphalidae	55	70	62.5	733.126	1422.99	1078.06	5	oligophagous	2	Open_landscape	intermediate				Fabriciana_adippe	1078.06	5	2
Fabriciana_niobe	Nymphalidae	55	70	62.5	733.126	1422.99	1078.06	3	oligophagous	3	Open_landscape	intermediate				Fabriciana_niobe	1078.06	3	3
Fagivorina_arenaria	Geometridae	11	14	12.5	4.40373	8.1825	6.29311	ND	oligophagous	1	Forest	intermediate				Fagivorina_arenaria	6.29311	6	1
Falcaria_lacertinaria	Drepanidae	15	19	17	26.1166	53.7484	39.9325	2	oligophagous	3	Open_landscape	intermediate				Falcaria_lacertinaria	39.9325	2	3
Falseuncaria_ruficiliana	Tortricidae	14	20	17	10.9065	29.6082	20.2573	1	monophagous	0	Open_landscape	intermediate				Falseuncaria_ruficiliana	20.2573	1	0
Favonius_quercus	Lycaenidae	28	36	32	86.8365	166.908	126.872	4	oligophagous	2	Forest	sedentary				Favonius_quercus	126.872	4	2
Furcula_bicuspis	Notodontidae	15	20	17.5	25.9788	62.594	44.2864	2	oligophagous	1	Forest	intermediate				Furcula_bicuspis	44.2864	2	1
Furcula_bifida	Notodontidae	15	20	17.5	25.9788	62.594	44.2864	2	oligophagous	1	Forest	intermediate				Furcula_bifida	44.2864	2	1
Furcula_furcula	Notodontidae	14	18	16	21.0391	45.3587	33.1989	6	polyphagous	3	Forest	intermediate				Furcula_furcula	33.1989	6	3
Gagitodes_sagittata	Geometridae	12	15	13.5	5.5068	9.76925	7.63803	2	oligophagous	1	Open_landscape	intermediate				Gagitodes_sagittata	7.63803	2	1
[truncated: 759 more rows]

## Sheet: A4
Functional trait expression determines contrasting temporal trends of Lepidoptera inside and outside protected areas
[truncated: 24 more rows]

[truncated: 1 more sheets: A5]
